# Supplementary material
Source: publisher figshare collection journal article supplement (https://acs.figshare.com/ndownloader/files/23166485)
Supplement: Supplementary file 1 [file 23166485]

## Sheet: Splash sheet
	Supporting Information for:
	Extensive Evaluation of Performance of the COSMO-RS Approach
	in Capturing Liquid-Liquid Equilibria of Binary Mixtures of Ionic Liquids
	with Molecular Compounds
	Published in: Industrial & Engineering Chemistry Research
	DOI: 10.1021/acs.iecr.0c00449
	by Kamil Paduszyński & Marta Królikowska
	Department of Physical Chemistry, Faculty of Chemistry
	Warsaw University of Technology, Noakowskiego 3, 00-664 Warsaw, Poland
	E-mail: kpaduszynski@ch.pw.edu.pl

## Sheet: Ion codes
Code	Name	M / g/mol	Charge	Class	Family	SMILES
im-1o6	1-[(hexyloxy)methyl]-1H-imidazol-3-ium	183.27	1	cation	imidazolium	CCCCCCOCn1cc[nH+]c1
im-1,1	1,3-dimethyl-1H-imidazol-3-ium	97.138	1	cation	imidazolium	Cn1cc[n+](C)c1
im-2,1	1-ethyl-3-methyl-1H-imidazol-3-ium	111.164	1	cation	imidazolium	CCn1cc[n+](C)c1
im-2,2	1,3-diethyl-1H-imidazol-3-ium	125.191	1	cation	imidazolium	CCn1cc[n+](CC)c1
im-3,1	1-methyl-3-propyl-1H-imidazol-3-ium	125.191	1	cation	imidazolium	CCC[n+]1ccn(C)c1
im-3,1,1	1,2-dimethyl-3-propyl-1H-imidazol-3-ium	139.218	1	cation	imidazolium	CCC[n+]1ccn(C)c1C
im-4,1	1-butyl-3-methyl-1H-imidazol-3-ium	139.218	1	cation	imidazolium	CCCCn1cc[n+](C)c1
im-4,2	3-butyl-1-ethyl-1H-imidazol-3-ium	153.244	1	cation	imidazolium	CCCC[n+]1ccn(CC)c1
im-4,1,1	1-butyl-2,3-dimethyl-1H-imidazol-3-ium	153.244	1	cation	imidazolium	CCCCn1cc[n+](C)c1C
im-5,1	3-methyl-1-pentyl-1H-imidazol-3-ium	153.244	1	cation	imidazolium	CCCCCn1cc[n+](C)c1
im-6,1	3-hexyl-1-methyl-1H-imidazol-3-ium	167.271	1	cation	imidazolium	CCCCCC[n+]1ccn(C)c1
im-6,2	3-ethyl-1-hexyl-1H-imidazol-3-ium	181.297	1	cation	imidazolium	CCCCCCn1cc[n+](CC)c1
im-6,1,1	3-hexyl-1,2-dimethyl-1H-imidazol-3-ium	181.297	1	cation	imidazolium	CCCCCC[n+]1ccn(C)c1C
im-7,1	3-heptyl-1-methyl-1H-imidazol-3-ium	181.297	1	cation	imidazolium	CCCCCCC[n+]1ccn(C)c1
im-8,1	3-methyl-1-octyl-1H-imidazol-3-ium	195.324	1	cation	imidazolium	CCCCCCCCn1cc[n+](C)c1
im-10,1	1-decyl-3-methyl-1H-imidazol-3-ium	223.377	1	cation	imidazolium	CCCCCCCCCCn1cc[n+](C)c1
im-12,1	1-dodecyl-3-methyl-1H-imidazol-3-ium	251.414	1	cation	imidazolium	CCCCCCCCCCCCn1cc[n+](C)c1
im-a,1	3-methyl-1-(prop-2-en-1-yl)-1H-imidazol-3-ium	123.175	1	cation	imidazolium	C[n+]1ccn(CC=C)c1
im-2oh,1	1-(2-hydroxyethyl)-3-methyl-1H-imidazol-3-ium	127.164	1	cation	imidazolium	C[n+]1ccn(CCO)c1
im-1o6,1	3-[(hexyloxy)methyl]-1-methyl-1H-imidazol-3-ium	197.301	1	cation	imidazolium	CCCCCCOC[n+]1ccn(C)c1
im-1o4,1o4	1,3-bis(butoxymethyl)-1H-imidazol-3-ium	241.349	1	cation	imidazolium	CCCCOCn1cc[n+](COCCCC)c1
im-1o6,1o6	1,3-bis[(hexyloxy)methyl]-1H-imidazol-3-ium	297.456	1	cation	imidazolium	CCCCCCOCn1cc[n+](COCCCCCC)c1
im-2o1,1	3-(2-methoxyethyl)-1-methyl-1H-imidazol-3-ium	141.19	1	cation	imidazolium	COCC[n+]1ccn(C)c1
py-1[2],1[4],1[6]	2,4,6-trimethylpyridin-1-ium	122.19	1	cation	pyridinium	Cc1cc(C)[nH+]c(C)c1
py-2	1-ethylpyridin-1-ium	108.16	1	cation	pyridinium	CC[n+]1ccccc1
py-4	1-butylpyridin-1-ium	136.214	1	cation	pyridinium	CCCC[n+]1ccccc1
py-6	1-hexylpyridin-1-ium	164.267	1	cation	pyridinium	CCCCCC[n+]1ccccc1
py-8	1-octylpyridin-1-ium	192.32	1	cation	pyridinium	CCCCCCCC[n+]1ccccc1
py-1,1[4]	1,4-dimethylpyridin-1-ium	108.081	1	cation	pyridinium	Cc1cc[n+](C)cc1
py-2,1[2]	1-ethyl-2-methylpyridin-1-ium	122.187	1	cation	pyridinium	CC[n+]1ccccc1C
py-2,1[3]	1-ethyl-3-methylpyridin-1-ium	122.187	1	cation	pyridinium	CC[n+]1cccc(C)c1
py-2,1[4]	1-ethyl-4-methylpyridin-1-ium	122.187	1	cation	pyridinium	CC[n+]1ccc(C)cc1
py-3,1[3]	3-methyl-1-propylpyridin-1-ium	136.214	1	cation	pyridinium	CCC[n+]1cccc(C)c1
py-4,1[2]	1-butyl-2-methylpyridin-1-ium	150.24	1	cation	pyridinium	CCCC[n+]1ccccc1C
py-4,1[3]	1-butyl-3-methylpyridin-1-ium	150.24	1	cation	pyridinium	CCCC[n+]1cccc(C)c1
py-4,1[4]	1-butyl-4-methylpyridin-1-ium	150.24	1	cation	pyridinium	CCCC[n+]1ccc(C)cc1
py-6,1[3]	1-hexyl-3-methylpyridin-1-ium	178.294	1	cation	pyridinium	CCCCCC[n+]1cccc(C)c1
py-6,1[3],1[5]	1-hexyl-3,5-dimethylpyridin-1-ium	192.32	1	cation	pyridinium	CCCCCC[n+]1cc(C)cc(C)c1
py-6,2[2],1[3],1[5]	2-Ethyl-1-hexyl-3,5-dimethyl-pyridinium	220.373	1	cation	pyridinium	CCCCCC[n+]1cc(C)cc(C)c1CC
py-8,1[3]	3-methyl-1-octylpyridin-1-ium	206.347	1	cation	pyridinium	CCCCCCCC[n+]1cccc(C)c1
py-10,1[3]	1-decyl-3-methylpyridin-1-ium	234.406	1	cation	pyridinium	CCCCCCCCCC[n+]1cccc(C)c1
py-12,1[3]	1-dodecyl-3-methylpyridin-1-ium	262.46	1	cation	pyridinium	CCCCCCCCCCCC[n+]1cccc(C)c1
py-14,1[3]	3-methyl-1-tetradecylpyridin-1-ium	290.514	1	cation	pyridinium	CCCCCCCCCCCCCC[n+]1cccc(C)c1
py-3oh	1-(3-hydroxypropyl)pyridin-1-ium	138.186	1	cation	pyridinium	OCCC[n+]1ccccc1
py-4,cn[4]	4-cyano-1-butylpyridin-1-ium	161.223	1	cation	pyridinium	CCCC[n+]1ccc(cc1)C#N
py-6,cn[3]	3-cyano-1-hexylpyridin-1-ium	189.276	1	cation	pyridinium	CCCCCC[n+]1cccc(c1)C#N
py-6,cn[4]	4-cyano-1-hexylpyridin-1-ium	189.276	1	cation	pyridinium	CCCCCC[n+]1ccc(cc1)C#N
py-8,cn[3]	3-cyano-1-octylpyridin-1-ium	217.329	1	cation	pyridinium	CCCCCCCC[n+]1cccc(c1)C#N
py-6,dma[4]	4-(dimethylamino)-1-hexylpyridin-1-ium	207.335	1	cation	pyridinium	CCCCCC[n+]1ccc(cc1)N(C)C
py-6,1[3],dma[4]	4-(dimethylamino)-1-hexyl-3-methylpyridin-1-ium	221.361	1	cation	pyridinium	CCCCCC[n+]1ccc(N(C)C)c(C)c1
py-1o10,conh2[4]	4-carbamoyl-1-[(decyloxy)methyl]pyridin-1-ium	293.43	1	cation	pyridinium	CCCCCCCCCCOC[n+]1ccc(cc1)C(N)=O
quin-4	1-butylquinolin-1-ium	186.272	1	cation	quinolinium	CCCC[n+]1cccc2ccccc12
quin-6	1-hexylquinolin-1-ium	214.325	1	cation	quinolinium	CCCCCC[n+]1cccc2ccccc12
quin-8	1-octylquinolin-1-ium	242.385	1	cation	quinolinium	CCCCCCCC[n+]1cccc2ccccc12
quini-4	2-butylisoquinolin-2-ium	186.272	1	cation	quinolinium	CCCC[n+]1ccc2ccccc2c1
quini-6	2-hexylisoquinolin-2-ium	214.325	1	cation	quinolinium	CCCCCC[n+]1ccc2ccccc2c1
quini-8	2-octylisoquinolin-2-ium	242.379	1	cation	quinolinium	CCCCCCCC[n+]1ccc2ccccc2c1
n-4,1,1,1	butyltrimethylazanium	116.224	1	cation	ammonium	CCCC[N+](C)(C)C
n-4,4,4,4	tetrabutylazanium	242.463	1	cation	ammonium	CCCC[N+](CCCC)(CCCC)CCCC
n-8,2,2,2	triethyl(octyl)azanium	214.41	1	cation	ammonium	CCCCCCCC[N+](CC)(CC)CC
n-8,8,8,1	methyltrioctylazanium	368.702	1	cation	ammonium	CCCCCCCC[N+](C)(CCCCCCCC)CCCCCCCC
n-10,10,1,1	bis(decyl)dimethylazanium	326.623	1	cation	ammonium	CCCCCCCCCC[N+](C)(C)CCCCCCCCCC
n-1ph,14,1,1	benzyldimethyltetradecylazanium	332.595	1	cation	ammonium	CCCCCCCCCCCCCC[N+](C)(C)Cc1ccccc1
n-2oh,3,1,1	(2-hydroxyethyl)dimethylpropylazanium	132.223	1	cation	ammonium	CCC[N+](C)(C)CCO
n-2oh,6,1,1	hexyl(2-hydroxyethyl)dimethylazanium	174.307	1	cation	ammonium	CCCCCC[N+](C)(C)CCO
n-2oh,1,1,1	(2-hydroxyethyl)trimethylazanium	104.17	1	cation	ammonium	C[N+](C)(C)CCO
n-2oh,2,1,1	ethyl(2-hydroxyethyl)dimethylazanium	118.197	1	cation	ammonium	CC[N+](C)(C)CCO
n-2oh,5,1,1	(2-hydroxyethyl)dimethylpentylazanium	160.28	1	cation	ammonium	CCCCC[N+](C)(C)CCO
n-2oh,4,1,1	butyl(2-hydroxyethyl)dimethylazanium	146.25	1	cation	ammonium	CCCC[N+](C)(C)CCO
n-2o1,2,2,1	diethyl(2-methoxyethyl)methylazanium	146.25	1	cation	ammonium	CC[N+](C)(CC)CCOC
n-2oac,1,1,1	[2-(acetyloxy)ethyl]trimethylazanium	146.209	1	cation	ammonium	CC(=O)OCC[N+](C)(C)C
n-1o5,2oac,1,1	[2-(acetyloxy)ethyl]dimethyl[(pentyloxy)methyl]azanium	232.339	1	cation	ammonium	CCCCCOC[N+](C)(C)CCOC(C)=O
n-1o[11],2oh,1,1	(2-hydroxyethyl)[(undecyloxy)methyl]dimethylazanium	274.462	1	cation	ammonium	CCCCCCCCCCCOC[N+](C)(C)CCO
pyr-3,1	1-methyl-1-propylpyrrolidin-1-ium	128.235	1	cation	pyrrolidinium	CCC[N+]1(C)CCCC1
pyr-4,1	1-butyl-1-methylpyrrolidin-1-ium	142.261	1	cation	pyrrolidinium	CCCC[N+]1(C)CCCC1
pyr-6,1	1-hexyl-1-methylpyrrolidin-1-ium	170.314	1	cation	pyrrolidinium	CCCCCC[N+]1(C)CCCC1
pyr-2o1,1	1-(2-methoxyethyl)-1-methylpyrrolidin-1-ium	144.234	1	cation	pyrrolidinium	COCC[N+]1(C)CCCC1
pip-2,1	1-ethyl-1-methylpiperidin-1-ium	128.235	1	cation	piperidinium	CC[N+]1(C)CCCCC1
pip-3,1	1-methyl-1-propylpiperidin-1-ium	142.261	1	cation	piperidinium	CCC[N+]1(C)CCCCC1
pip-4,1	1-butyl-1-methylpiperidin-1-ium	156.288	1	cation	piperidinium	CCCC[N+]1(C)CCCCC1
pip-6,1	1-hexyl-1-methylpiperidin-1-ium	184.341	1	cation	piperidinium	CCCCCC[N+]1(C)CCCCC1
pip-2o1,1	1-(2-methoxyethyl)-1-methylpiperidin-1-ium	158.26	1	cation	piperidinium	COCC[N+]1(C)CCCCC1
dabco-6	1-hexyl-1,4-diazabicyclo[2.2.2]octan-1-ium	197.34	1	cation	bicyclic	CCCCCC[N@@+]12CC[N@@](CC1)CC2
mo-4,1	4-butyl-4-methylmorpholin-4-ium	158.261	1	cation	morpholinium	CCCC[N+]1(C)CCOCC1
mo-6,1	4-hexyl-4-methylmorpholin-4-ium	186.315	1	cation	morpholinium	CCCCCC[N+]1(C)CCOCC1
mo-2o1,1	4-(2-methoxyethyl)-4-methylmorpholin-4-ium	160.233	1	cation	morpholinium	COCC[N+]1(C)CCOCC1
p-4i,4i,4i,1	methyltris(2-methylpropyl)phosphanium	217.351	1	cation	phosphonium	CC[P+](CC(C)C)(CC(C)C)CC(C)C
p-4,4,4,4	tetrabutylphosphanium	259.43	1	cation	phosphonium	CCCC[P+](CCCC)(CCCC)CCCC
p-14,6,6,6	trihexyl(tetradecyl)phosphanium	483.856	1	cation	phosphonium	CCCCCCCCCCCCCC[P+](CCCCCC)(CCCCCC)CCCCCC
s-2,2,1	diethyl(methyl)sulfanium	105.221	1	cation	sulfonium	CC[S+](C)CC
s-2,2,2	triethylsulfanium	119.248	1	cation	sulfonium	CC[S+](CC)CC
fsa	bis(flurosulfonyl)azanide	180.132	-1	anion	NTf2 derivatives	FS(=O)(=O)[N-]S(F)(=O)=O
ntf2	bis(trifluoromethylsulfonyl)azanide	280.147	-1	anion	NTf2 derivatives	FC(F)(F)S(=O)(=O)[N-]S(=O)(=O)C(F)(F)F
ctf3	tris(trifluoromethylsulfonyl)methide	411.22	-1	anion	methanides	FC(F)(F)S(=O)(=O)[C-](S(=O)(=O)C(F)(F)F)S(=O)(=O)C(F)(F)F
dca	dicyanoazanide	66.042	-1	anion	dicyanamides	N#C[N-]C#N
ccn3	tricyanomethide	90.063	-1	anion	methanides	N#C[C-](C#N)C#N
bf4	tetrafluoroborate	86.805	-1	anion	BF4 derivatives	F[B-](F)(F)F
tcb	tetracyanoboranuide	114.881	-1	anion	BF4 derivatives	N#C[B-](C#N)(C#N)C#N
pf6	hexafluorophosphate	144.965	-1	anion	PF6 derivatives	F[P-](F)(F)(F)(F)F
fap	trifluorotris(pentafluoroethyl)-$\lambda^5$-phosphanuide	445.01	-1	anion	PF6 derivatives	FC(F)(F)C(F)(F)[P-](F)(F)(F)(C(F)(F)C(F)(F)F)C(F)(F)C(F)(F)F
so3-1	methanesulfonate	95.098	-1	anion	sulfonates	CS([O-])(=O)=O
dbs	2-dodecylbenzene-1-sulfonate	325.487	-1	anion	sulfonates	CCCCCCCCCCCCc1ccccc1S([O-])(=O)=O
so3-ph1	4-methylbenzene-1-sulfonate	171.194	-1	anion	sulfonates	Cc1ccc(cc1)S([O-])(=O)=O
so4-1	methyl sulfate	111.098	-1	anion	sulfates	COS([O-])(=O)=O
so4-2	ethyl sulfate	125.124	-1	anion	sulfates	CCOS([O-])(=O)=O
so4-8	octyl sulfate	209.284	-1	anion	sulfates	CCCCCCCCOS([O-])(=O)=O
so4-12	dodecyl sulfate	265.39	-1	anion	sulfates	CCCCCCCCCCCCOS([O-])(=O)=O
so4-[2o]21	2-(2-methoxyethoxy)ethyl sulfate	199.203	-1	anion	sulfates	COCCOCCOS([O-])(=O)=O
po2-8i,8i	bis(2,4,4-trimethylpentyl)phosphinate	289.414	-1	anion	phosphates	C[C@H](CC(C)(C)C)CP([O-])(=O)C[C@H](C)CC(C)(C)C
otf	trifluoromethanesulfonate	149.07	-1	anion	sulfonates	[O-]S(=O)(=O)C(F)(F)F
cl	chloride	35.454	-1	anion	inorganics	[Cl-]
br	bromide	79.905	-1	anion	inorganics	[Br-]
no3	nitrate	62.005	-1	anion	inorganics	[O-][N+]([O-])=O
scn	thiocyanate	58.083	-1	anion	inorganics	[S-]C#N
ac	acetate	59.045	-1	anion	carboxylates	CC([O-])=O
8ac	decanoate	171.257	-1	anion	carboxylates	CCCCCCCCCC([O-])=O
tfa	trifluoroacetate	113.016	-1	anion	carboxylates	[O-]C(=O)C(F)(F)F
acsul	acesulfamate	162.144	-1	anion	sulfonates	CC1=CC(=O)[N-]S(=O)(=O)O1
tdi	4,5-dicyano-2-(trifluoromethyl)-1H-imidazol-1-ide	185.087	-1	anion	heterocyclic amines	FC(F)(F)c1nc(C#N)c([n-]1)C#N
1,1,1,2,2,3,3,4,4,5,5,6,6-tridecafluorooctane	1,1,1,2,2,3,3,4,4,5,5,6,6-tridecafluorooctane	348.107	0	solute	alkyl halides	CCC(F)(F)C(F)(F)C(F)(F)C(F)(F)C(F)(F)C(F)(F)F
1,2-butanediol	(2S)-butane-1,2-diol	90.122	0	solute	alcohols	CC[C@H](O)CO
1,2-dibromoethane	1,2-dibromoethane	187.862	0	solute	alkyl halides	BrCCBr
1,2-dimethylcyclohexane	(1R,2R)-1,2-dimethylcyclohexane	112.216	0	solute	cyclic alkanes	C[C@@H]1CCCC[C@H]1C
1,2-ethanediol	ethane-1,2-diol	62.068	0	solute	alcohols	OCCO
1,2-hexanediol	(2S)-hexane-1,2-diol	118.176	0	solute	alcohols	CCCC[C@H](O)CO
1,2-pentanediol	(2S)-pentane-1,2-diol	104.149	0	solute	alcohols	CCC[C@H](O)CO
1,2-propanediol	(2S)-propane-1,2-diol	76.095	0	solute	alcohols	C[C@H](O)CO
1,3-butanediol	(3R)-butane-1,3-diol	90.122	0	solute	alcohols	C[C@@H](O)CCO
1,3-dibromopropane	1,3-dibromopropane	201.889	0	solute	alkyl halides	BrCCCBr
1,3-dichloropropane	1,3-dichloropropane	112.98	0	solute	cyclic alkanes	ClCCCCl
1,3-dimethylcyclohexane	(1R,3S)-1,3-dimethylcyclohexane	112.216	0	solute	cyclic alkanes	C[C@H]1CCC[C@@H](C)C1
1,3-propanediol	propane-1,3-diol	76.095	0	solute	alcohols	OCCCO
1,4-butanediol	butane-1,4-diol	90.122	0	solute	alcohols	OCCCCO
1,4-dibromobutane	1,4-dibromobutane	215.916	0	solute	alkyl halides	BrCCCCBr
1,4-dichlorobutane	1,4-dichlorobutane	127.01	0	solute	alkyl halides	ClCCCCCl
1,4-dioxane	1,4-dioxane	88.106	0	solute	ethers	C1COCCO1
1,5-dibromopentane	1,5-dibromopentane	229.943	0	solute	alkyl halides	BrCCCCCBr
1,5-dichloropentane	1,5-dichloropentane	141.04	0	solute	alkyl halides	ClCCCCCCl
1,5-pentanediol	pentane-1,5-diol	104.149	0	solute	alcohols	OCCCCCO
1,6-dibromohexane	1,6-dibromohexane	243.97	0	solute	alkyl halides	BrCCCCCCBr
1,6-dichlorohexane	1,6-dichlorohexane	155.06	0	solute	alkyl halides	ClCCCCCCCl
1-bromobutane	1-bromobutane	137.02	0	solute	alkyl halides	CCCCBr
1-bromoethane	bromoethane	108.966	0	solute	alkyl halides	CCBr
1-bromopentane	1-bromopentane	151.047	0	solute	alkyl halides	CCCCCBr
1-bromopropane	1-bromopropane	122.993	0	solute	alkyl halides	CCCBr
1-butanol	butan-1-ol	74.123	0	solute	alcohols	CCCCO
1-chlorobutane	1-chlorobutane	92.57	0	solute	alkyl halides	CCCCCl
1-chloropentane	1-chloropentane	106.59	0	solute	alkyl halides	CCCCCCl
1-chloropropane	1-chloropropane	78.54	0	solute	alkyl halides	CCCCl
1-decanol	decan-1-ol	158.285	0	solute	alcohols	CCCCCCCCCCO
1-dodecanol	dodecan-1-ol	186.339	0	solute	alcohols	CCCCCCCCCCCCO
1-eicosanol	icosan-1-ol	298.555	0	solute	alcohols	CCCCCCCCCCCCCCCCCCCCO
1-heptanol	heptan-1-ol	116.204	0	solute	alcohols	CCCCCCCO
1-hexadecanol	hexadecan-1-ol	242.447	0	solute	alcohols	CCCCCCCCCCCCCCCCO
1-hexanol	hexan-1-ol	102.177	0	solute	alcohols	CCCCCCO
1-nonanol	nonan-1-ol	144.258	0	solute	alcohols	CCCCCCCCCO
1-octadecanol	octadecan-1-ol	270.501	0	solute	alcohols	CCCCCCCCCCCCCCCCCCO
1-octanol	octan-1-ol	130.231	0	solute	alcohols	CCCCCCCCO
1-pentanol	pentan-1-ol	88.15	0	solute	alcohols	CCCCCO
1-propanol	propan-1-ol	60.096	0	solute	alcohols	CCCO
1-tetradecanol	tetradecan-1-ol	214.393	0	solute	alcohols	CCCCCCCCCCCCCCO
1-undecanol	undecan-1-ol	172.312	0	solute	alcohols	CCCCCCCCCCCO
2,3-butanediol	(2R,3S)-butane-2,3-diol	90.122	0	solute	alcohols	C[C@@H](O)[C@H](C)O
2-butanol	(2R)-butan-2-ol	74.123	0	solute	alcohols	CC[C@@H](C)O
2-hexanone	hexan-2-one	100.161	0	solute	ketones	CCCCC(C)=O
2-methyl-1-butanol	(2R)-2-methylbutan-1-ol	88.15	0	solute	alcohols	CC[C@@H](C)CO
2-methyl-1-propanol	2-methylpropan-1-ol	74.123	0	solute	alcohols	CC(C)CO
2-methyl-2-butanol	2-methylbutan-2-ol	88.15	0	solute	alcohols	CCC(C)(C)O
2-methyl-2-propanol	2-methylpropan-2-ol	74.123	0	solute	alcohols	CC(C)(C)O
2-methylpropan-1-ol	2-methylpropan-1-ol	74.123	0	solute	alcohols	CC(C)CO
2-methylthiophene	2-methylthiophene	98.16	0	solute	S-compounds	Cc1cccs1
2-pentanol	(2R)-pentan-2-ol	88.15	0	solute	alcohols	CCC[C@@H](C)O
2-pentanone	pentan-2-one	86.134	0	solute	ketones	CCCC(C)=O
2-propanol	propan-2-ol	60.096	0	solute	ketones	CC(C)O
3,3,4,4,5,5,6,6,7,7,8,8,8-tridecafluoro-1-octanol	3,3,4,4,5,5,6,6,7,7,8,8,8-tridecafluorooctan-1-ol	364.106	0	solute	alcohols	OCCC(F)(F)C(F)(F)C(F)(F)C(F)(F)C(F)(F)C(F)(F)F
3-methylbutan-1-ol	3-methylbutan-1-ol	88.15	0	solute	alcohols	CC(C)CCO
3-pentanone	pentan-3-one	86.134	0	solute	ketones	CCC(=O)CC
4,4,5,5,6,6,7,7,8,8,9,9,9-tridecafluoro-1-nonanol	4,4,5,5,6,6,7,7,8,8,9,9,9-tridecafluorononan-1-ol	378.133	0	solute	alcohols	OCCCC(F)(F)C(F)(F)C(F)(F)C(F)(F)C(F)(F)C(F)(F)F
4-heptanone	heptan-4-one	114.188	0	solute	ketones	CCCC(=O)CCC
5-nonanone	nonan-5-one	142.242	0	solute	ketones	CCCCC(=O)CCCC
7,7,8,8,8-pentafluoro-1-octanol	7,7,8,8,8-pentafluorooctan-1-ol	220.183	0	solute	alcohols	OCCCCCCC(F)(F)C(F)(F)F
ETBE	2-ethoxy-2-methylpropane	102.177	0	solute	ethers	CCOC(C)(C)C
MTBE	2-methoxy-2-methylpropane	88.15	0	solute	ethers	COC(C)(C)C
TAME	2-methoxy-2-methylbutane	102.177	0	solute	ethers	CCC(C)(C)OC
aniline	aniline	93.129	0	solute	amines	Nc1ccccc1
benzene	benzene	78.114	0	solute	aromatics	c1ccccc1
bromobenzene	bromobenzene	157.01	0	solute	alkyl halides	Brc1ccccc1
chlorobenzene	chlorobenzene	112.56	0	solute	alkyl halides	Clc1ccccc1
cycloheptane	cycloheptane	98.189	0	solute	cyclic alkanes	C1CCCCCC1
cyclohexane	cyclohexane	84.162	0	solute	cyclic alkanes	C1CCCCC1
cyclohexanol	cyclohexanol	100.161	0	solute	alcohols	OC1CCCCC1
cyclopentane	cyclopentane	70.135	0	solute	cyclic alkanes	C1CCCC1
cyclopentanone	cyclopentanone	84.118	0	solute	ketones	O=C1CCCC1
d-sorbitol	(2R,3R,4R,5S)-hexane-1,2,3,4,5,6-hexol	182.172	0	solute	alcohols	OC[C@H](O)[C@@H](O)[C@H](O)[C@H](O)CO
di-n-butylether	1-butoxybutane	130.231	0	solute	ethers	CCCCOCCCC
di-n-pentylether	1-(pentyloxy)pentane	158.285	0	solute	ethers	CCCCCOCCCCC
di-n-propylether	1-propoxypropane	102.177	0	solute	ethers	CCCOCCC
dibromomethane	dibromomethane	173.835	0	solute	alkyl halides	BrCBr
dichlorobenzene	1,4-dichlorobenzene	147	0	solute	alkyl halides	Clc1ccc(Cl)cc1
dichloromethane	dichloromethane	84.93	0	solute	alkyl halides	ClCCl
ethanol	ethanol	46.069	0	solute	alcohols	CCO
ethylbenzene	ethylbenzene	106.168	0	solute	aromatics	CCc1ccccc1
glycerol	propane-1,2,3-triol	92.094	0	solute	alcohols	OCC(O)CO
iodobenzene	iodobenzene	204.01	0	solute	alkyl halides	Ic1ccccc1
linalool	(3S)-3,7-dimethylocta-1,6-dien-3-ol	154.253	0	solute	alcohols	CC(C)=CCC[C@](C)(O)C=C
m-xylene	1,3-xylene	106.168	0	solute	aromatics	Cc1cccc(C)c1
methylcyclohexane	methylcyclohexane	98.189	0	solute	cyclic alkanes	CC1CCCCC1
n-butyl-methyl-ether	1-methoxybutane	88.15	0	solute	ethers	CCCCOC
n-butylbenzene	butylbenzene	134.222	0	solute	aromatics	CCCCc1ccccc1
n-decane	decane	142.286	0	solute	alkanes	CCCCCCCCCC
n-dodecane	dodecane	170.34	0	solute	alkanes	CCCCCCCCCCCC
n-heptane	heptane	100.205	0	solute	alkanes	CCCCCCC
n-hexadecane	hexadecane	226.448	0	solute	alkanes	CCCCCCCCCCCCCCCC
n-hexane	hexane	86.178	0	solute	alkanes	CCCCCC
n-nonane	nonane	128.259	0	solute	alkanes	CCCCCCCCC
n-octane	octane	114.232	0	solute	alkanes	CCCCCCCC
n-pentane	pentane	72.151	0	solute	alkanes	CCCCC
n-propylbenzene	propylbenzene	120.195	0	solute	aromatics	CCCc1ccccc1
n-tetradecane	tetradecane	198.394	0	solute	alkanes	CCCCCCCCCCCCCC
n-undecane	undecane	156.313	0	solute	alkanes	CCCCCCCCCCC
nicotine	3-[(2R)-1-methylpyrrolidin-2-yl]pyridine	162.236	0	solute	amines	CN1CCC[C@@H]1c1cccnc1
o-xylene	1,2-xylene	106.168	0	solute	aromatics	Cc1ccccc1C
oleinic-acid	(9Z)-octadec-9-enoic acid	282.468	0	solute	acids	CCCCCCCC\C=C/CCCCCCCC(O)=O
p-xylene	1,4-xylene	106.168	0	solute	aromatics	Cc1ccc(C)cc1
perfluoroheptane	hexadecafluoroheptane	388.051	0	solute	alkyl halides	FC(F)(F)C(F)(F)C(F)(F)C(F)(F)C(F)(F)C(F)(F)C(F)(F)F
perfluorohexane	tetradecafluorohexane	338.044	0	solute	alkyl halides	FC(F)(F)C(F)(F)C(F)(F)C(F)(F)C(F)(F)C(F)(F)F
perfluorooctane	octadecafluorooctane	438.059	0	solute	alkyl halides	FC(F)(F)C(F)(F)C(F)(F)C(F)(F)C(F)(F)C(F)(F)C(F)(F)C(F)(F)F
tetrahydrofuran	oxolane	72.107	0	solute	ethers	C1CCOC1
thiophene	thiophene	84.14	0	solute	S-compounds	c1ccsc1
toluene	toluene	92.141	0	solute	aromatics	Cc1ccccc1
water	water	18.015	0	solute	water	O
xylitol	(2R,3R,4S)-pentane-1,2,3,4,5-pentol	152.146	0	solute	alcohols	OC[C@H](O)[C@@H](O)[C@H](O)CO
d-sorbitol	(2R,3R,4R,5S)-hexane-1,2,3,4,5,6-hexol	182.172	0	solute	alcohols	OC[C@H](O)[C@@H](O)[C@H](O)[C@H](O)CO

## Sheet: References
Key	Author	Journal	Year	Volume	First page
batista-2014	Batista et al.	J. Mol. Liq.	2014	192	26
bendova-2006	Bendová et al.	J. Chem. Eng. Data	2006	51	2126
blesic-2010a	Blesic et al.	Phys. Chem. Chem. Phys.	2010	12	9685
calado-2013	Calado et al.	Fluid Phase Equilib.	2013	337	67
chapeaux-2007	Chapeaux et al.	J. Chem. Eng. Data	2007	52	2462
ciocirlan-2014	Ciocirlan et al.	J. Chem. Eng. Data	2014	59	1165
costa-2012	Costa et al.	J. Phys. Chem. B	2012	116	9186
crosthwaite-2004	Crosthwaite et al.	J. Phys. Chem. B	2004	108	5113
crosthwaite-2005a	Crosthwaite et al.	Fluid Phase Equilib.	2005	228-229	303
crosthwaite-2006	Crosthwaite et al.	J. Phys. Chem. B	2006	110	9354
dittmar-2009	Dittmar et al.	J. Mol. Liq.	2009	145	116
domanska-2003	Domańska et al.	Chem. Eur. J.	2003	9	3033
domanska-2003a	Domańska et al.	J. Chem. Eng. Data	2003	48	451
domanska-2004	Domańska et al.	J. Phys. Chem. B	2004	108	2376
domanska-2005	Domańska et al.	J. Chem. Thermodyn.	2005	37	577
domanska-2006	Domańska et al.	J. Solution Chem.	2006	35	311
domanska-2006a	Domańska et al.	Green Chem.	2006	8	268
domanska-2006b	Domańska et al.	Thermochim. Acta	2006	448	19
domanska-2006c	Domańska et al.	J. Chem. Thermodyn.	2006	38	685
domanska-2007c	Domańska et al.	Fluid Phase Equilib.	2007	260	9
domanska-2007d	Domańska et al.	J. Chem. Eng. Data	2007	52	1872
domanska-2007e	Domańska et al.	J. Chem. Thermodyn.	2007	39	729
domanska-2007f	Domańska et al.	J. Phys. Chem. B	2007	111	4109
domanska-2007g	Domańska et al.	J. Chem. Eng. Data	2007	52	309
domanska-2007h	Domańska et al.	Green Chem.	2007	9	262
domanska-2008c	Domańska et al.	J. Chem. Eng. Data	2008	53	498
domanska-2008d	Domańska et al.	J. Phys. Chem. B	2008	112	1218
domanska-2008e	Domańska et al.	J. Phys. Chem. B	2008	112	11054
domanska-2008f	Domańska et al.	J. Solution Chem.	2008	37	1271
domanska-2008g	Domańska et al.	J. Chem. Eng. Data	2008	53	1126
domanska-2009a	Domańska et al.	J. Chem. Thermodyn.	2009	41	1303
domanska-2009i	Domańska et al.	J. Chem. Eng. Data	2009	54	1435
domanska-2009j	Domańska et al.	J. Phys. Chem. B	2009	113	6397
domanska-2009k	Domańska et al.	Fluid Phase Equilib.	2009	278	90
domanska-2010	Domańska et al.	J. Phys. Chem. B	2010	114	15011
domanska-2010c	Domańska et al.	Fluid Phase Equilib.	2010	294	72
domanska-2010d	Domańska et al.	J. Chem. Thermodyn.	2010	42	355
domanska-2010g	Domańska et al.	J. Chem. Thermodyn.	2010	42	1180
domanska-2010k	Domańska et al.	J. Chem. Eng. Data	2010	55	773
domanska-2011a	Domańska et al.	J. Chem. Thermodyn.	2011	43	989
domanska-2011b	Domańska et al.	J. Chem. Thermodyn.	2011	43	775
domanska-2011i	Domańska et al.	J. Chem. Thermodyn.	2011	43	1488
domanska-2011j	Domańska et al.	Fluid Phase Equilib.	2011	308	55
domanska-2011k	Domańska et al.	Fluid Phase Equilib.	2011	303	1
domanska-2011l	Domańska et al.	J. Phys. Chem. B	2011	115	4003
domanska-2012g	Domańska et al.	Chem. Eng. J.	2012	181-182	63
domanska-2012h	Domańska et al.	J. Chem. Thermodyn.	2012	55	225
domanska-2013f	Domańska et al.	Fluid Phase Equilib.	2013	345	18
domanska-2015c	Domańska et al.	Fluid Phase Equilib.	2015	387	18
domanska-2015d	Domańska et al.	J. Chem. Thermodyn.	2015	83	90
domanska-2016c	Domańska et al.	Fluid Phase Equilib.	2016	423	109
domanska-2016d	Domańska et al.	Ind. Eng. Chem. Res.	2016	55	5736
domanska-2016e	Domańska et al.	J. Chem. Thermodyn.	2016	102	357
domanska-2016g	Królikowski et al.	J. Mol. Liq.	2016	224	1124
domanska-2017	Domańska et al.	J. Phys. Chem. B	2017	121	7689
domanska-2017a	Domańska et al.	Fluid Phase Equilib.	2017	447	84
fernandez-2013	Fernández et al.	Ind. Eng. Chem. Res.	2013	52	11758
ferreira-2008	Ferreira et al.	Green Chem.	2008	10	918
forte-2011	Forte et al.	J. Chem. Eng. Data	2011	56	2273
freire-2007a	Freire et al.	J. Phys. Chem. B	2007	111	13082
freire-2008	Freire et al.	J. Phys. Chem. B	2008	112	1604
freire-2008a	Freire et al.	J. Chem. Eng. Data	2008	53	2378
freire-2010	Freire et al.	Fluid Phase Equilib.	2010	294	234
freire-2010a	Freire et al.	J. Phys. Chem. B	2010	114	15925
geppertrybczynska-2012	Geppert-Rybczyńska et al.	J. Chem. Eng. Data	2012	57	1923
gonzalez-2014a	González et al.	Fluid Phase Equilib.	2014	383	72
heintz-2003	Heintz et al.	J. Chem. Eng. Data	2003	48	472
heintz-2005	Heintz et al.	J. Solution Chem.	2005	34	1135
heintz-2005c	Heintz et al.	J. Chem. Eng. Data	2005	50	956
huo-2008a	Huo et al.	J. Chem. Eng. Data	2008	53	2535
juan-2011	Juan et al.	J. Chem. Eng. Data	2011	56	3963
karpinska-2019	Karpińska et al.	J. Chem. Thermodyn.	2019	137	56
krolikowska-2012a	Królikowska et al.	J. Phys. Chem. B	2012	116	4292
krolikowska-2013a	Królikowska et al.	J. Chem. Thermodyn.	2013	63	128
krolikowska-2013b	Królikowska et al.	Fluid Phase Equilib.	2013	354	66
krolikowska-2013c	Królikowska et al.	J. Chem. Eng. Data	2013	58	285
krolikowska-2014b	Królikowska et al.	Fluid Phase Equilib.	2014	361	273
kumar-2012	Kumar et al.	J. Chem. Eng. Data	2012	57	521
lachwa-2006	Łachwa et al.	J. Chem. Eng. Data	2006	51	2215
letcher-2010	Letcher et al.	Fluid Phase Equilib.	2010	294	89
li-2010c	Li et al.	J. Chem. Thermodyn.	2010	42	1478
lin-2007	Lin et al.	Fluid Phase Equilib.	2007	253	130
lukoshko-2015a	Lukoshko et al.	Fluid Phase Equilib.	2015	399	105
makowska-2006	Makowska et al.	J. Phys. Chem. B	2006	110	17195
makowska-2010	Makowska et al.	J. Chem. Eng. Data	2010	55	2829
makowska-2012	Makowska et al.	J. Mol. Liq.	2012	176	86
makowska-2012a	Makowska et al.	Fluid Phase Equilib.	2011	314	140
makowska-2014	Makowska et al.	Fluid Phase Equilib.	2014	382	100
makowska-2014a	Makowska et al.	Fluid Phase Equilib.	2014	372	21
marciniak-2011b	Marciniak et al.	Fluid Phase Equilib.	2011	307	160
marciniak-2011c	Marciniak et al.	Fluid Phase Equilib.	2011	304	121
marciniak-2011d	Marciniak et al.	J. Chem. Eng. Data	2011	56	368
matsuda-2014	Matsuda et al.	J. Solution Chem.	2014	43	1561
morais-2013	Morais et al.	Ind. Eng. Chem. Res.	2013	52	14722
najdanovicvisak-2003	Najdanovic-Visak et al.	J. Phys. Chem. B	2003	107	12797
najdanovicvisak-2007	Najdanovic-Visak et al.	Fluid Phase Equilib.	2007	254	35
navas-2009	Navas et al.	Ind. Eng. Chem. Res.	2009	48	2678
navas-2011	Navas et al.	Phys. Chem. Chem. Phys.	2011	13	7751
okuniewska-2014	Okuniewska et al.	Fluid Phase Equilib.	2014	376	55
okuniewski-2014	Okuniewski et al.	J. Chem. Thermodyn.	2014	77	23
ortega-2007	Ortega et al.	J. Chem. Eng. Data	2007	52	2269
ortega-2008	Ortega et al.	J. Chem. Thermodyn.	2008	40	1087
paduszynski-2011b	Paduszyński et al.	J. Phys. Chem. B	2011	115	12537
paduszynski-2011c	Paduszyński et al.	Fluid Phase Equilib.	2011	305	43
paduszynski-2014	Paduszyński et al.	J. Phys. Chem. B	2015	119	543
paduszynski-2015	Paduszyński et al.	J. Chem. Thermodyn.	2015	90	317
pereiro-2010a	Pereiro et al.	J. Phys. Chem. B	2010	114	8978
pereiro-2011	Pereiro et al.	J. Chem. Eng. Data	2011	56	4356
rao-2016	Srinivasa Rao et al.	J. Chem. Thermodyn.	2016	100	165
santos-2012	Santos et al.	Fluid Phase Equilib.	2012	325	105
shao-2014	Shao et al.	J. Chem. Eng. Data	2014	59	225
shiflett-2007	Shiflett et al.	J. Chem. Eng. Data	2007	52	1302
siporska-2012	Siporska et al.	J. Mol. Liq.	2012	176	101
siporska-2014	Siporska et al.	Fluid Phase Equilib.	2014	371	15
siporska-2015	Siporska et al.	J. Chem. Thermodyn.	2015	88	22
trindade-2010	Trindade et al.	Ind. Eng. Chem. Res.	2010	49	4850
vale-2010	Vale et al.	J. Chem. Eng. Data	2010	55	4195
vale-2010a	Vale et al.	J. Chem. Eng. Data	2010	55	2030
vale-2011	Vale et al.	J. Chem. Eng. Data	2011	56	1330
vale-2011a	Vale et al.	J. Chem. Eng. Data	2011	56	4829
vale-2012	Vale et al.	ChemPhysChem	2012	13	1860
vreekamp-2011	Vreekamp et al.	J. Phys. Chem. B	2011	115	8763
wagner-2003	Wagner et al.	Phys. Chem. Chem. Phys.	2003	5	3943
wang-2009a	Wang et al.	J. Chem. Thermodyn.	2009	41	1206
wertz-2007	Wertz et al.	J. Mol. Liq.	2007	131-132	2
wertz-2013	Wertz et al.	J. Chem. Eng. Data	2013	58	2375
wu-2003	Wu et al.	J. Chem. Eng. Data	2003	48	486
zawadzki-2012	Zawadzki et al.	J. Chem. Thermodyn.	2012	48	276

## Sheet: COSMO-RS vs exptl data points
Data point general information														Experimental data point (' - IL-rich phase, '' - solute-rich phase)					Problem met during COSMOtherm calculations						Computed data point (' - IL-rich phase, '' - solute-rich phase; empty cell if data point accepted - LLE split not predicted)																	Conformers count
IL ID	Dataset ID	Reference	Cation code	Cation family	Anion code	Anion family	Solute	Solute family	M (IL) / g/mol	M (solute) / g/mol	T / K	Mole fractions coverted from mass fraction		xIL'(exptl)	xIL''(exptl)	wIL'(exptl)	wIL''(exptl)		No problem met (COSMO-c0)	No problem met (COSMO-cx)	No problem met (FINE-c0)	No problem met (FINE-cx)	Data point accepted		xIL' (COSMO-c0)	xIL'' (COSMO-c0)	wIL' (COSMO-c0)	wIL'' (COSMO-c0)	xIL' (COSMO-cx)	xIL'' (COSMO-cx)	wIL' (COSMO-cx)	wIL'' (COSMO-cx)	xIL' (FINE-c0)	xIL'' (FINE-c0)	wIL' (FINE-c0)	wIL'' (FINE-c0)	xIL' (FINE-cx)	xIL'' (FINE-cx)	wIL' (FINE-cx)	wIL'' (FINE-cx)		# Conformers of cation (COSMO)	# Conformers of anions (COSMO)	# Conformers of solutes (COSMO)	# Conformers of cation (FINE)	# Conformers of anions (FINE)	# Conformers of solutes (FINE)
1	1	domanska-2016d	dabco-6	bicyclic	ntf2	NTf2 derivatives	water	water	477.487	18.015	308.2	FALSE		0.5307		0.967713			TRUE	TRUE	TRUE	TRUE	TRUE		0.596962	0.00078797	0.97516	0.0204737	0.617057	0.00070433	0.977121	0.0183388	0.706015	0.00054644	0.984533	0.0142843	0.702165	0.00056116	0.984249	0.0146637		4	3	1	4	3	1
1	1	domanska-2016d	dabco-6	bicyclic	ntf2	NTf2 derivatives	water	water	477.487	18.015	315.5	FALSE		0.5212		0.966502			TRUE	TRUE	TRUE	TRUE	TRUE		0.574382	0.00078595	0.972803	0.0204222	0.594368	0.00070472	0.974898	0.0183488	0.693097	0.00053782	0.983568	0.014062	0.689276	0.00055211	0.983276	0.0144305		4	3	1	4	3	1
1	1	domanska-2016d	dabco-6	bicyclic	ntf2	NTf2 derivatives	water	water	477.487	18.015	319.5	FALSE		0.51		0.965019			TRUE	TRUE	TRUE	TRUE	TRUE		0.561315	0.00079127	0.971358	0.0205577	0.581186	0.0007108	0.973532	0.0185043	0.685364	0.00053778	0.982974	0.014061	0.681559	0.00055196	0.982678	0.0144266		4	3	1	4	3	1
1	1	domanska-2016d	dabco-6	bicyclic	ntf2	NTf2 derivatives	water	water	477.487	18.015	325.2	FALSE		0.4936		0.962735			TRUE	TRUE	TRUE	TRUE	TRUE		0.541975	0.00080639	0.9691	0.0209426	0.561615	0.00072639	0.971392	0.0189027	0.673611	0.00054306	0.982047	0.0141971	0.669825	0.00055726	0.981742	0.0145632		4	3	1	4	3	1
1	1	domanska-2016d	dabco-6	bicyclic	ntf2	NTf2 derivatives	water	water	477.487	18.015	331.9	FALSE		0.4786		0.96052			TRUE	TRUE	TRUE	TRUE	TRUE		0.51835	0.00083538	0.96613	0.0216798	0.537619	0.0007551	0.968571	0.0196357	0.658785	0.00055705	0.980833	0.0145578	0.655027	0.00057148	0.980517	0.0149295		4	3	1	4	3	1
1	1	domanska-2016d	dabco-6	bicyclic	ntf2	NTf2 derivatives	water	water	477.487	18.015	336.4	FALSE		0.4635		0.958156			TRUE	TRUE	TRUE	TRUE	TRUE		0.502064	0.00086174	0.963931	0.0223492	0.521026	0.00078079	0.966479	0.0202907	0.648273	0.00057114	0.97994	0.0149207	0.644532	0.00058585	0.979616	0.0152993		4	3	1	4	3	1
1	1	domanska-2016d	dabco-6	bicyclic	ntf2	NTf2 derivatives	water	water	477.487	18.015	343.4	FALSE		0.4447		0.955008			TRUE	TRUE	TRUE	TRUE	TRUE		0.47626	0.00091417	0.960163	0.023678	0.494663	0.00083146	0.962888	0.0215802	0.631125	0.00060075	0.978424	0.0156826	0.627411	0.00061612	0.978086	0.0160776		4	3	1	4	3	1
1	1	domanska-2016d	dabco-6	bicyclic	ntf2	NTf2 derivatives	water	water	477.487	18.015	348.3	FALSE		0.422		0.950863			TRUE	TRUE	TRUE	TRUE	TRUE		0.457994	0.00095957	0.957259	0.0248258	0.475947	0.00087514	0.960115	0.0226891	0.618606	0.00062731	0.977268	0.016365	0.614912	0.00064331	0.976918	0.0167757		4	3	1	4	3	1
1	1	domanska-2016d	dabco-6	bicyclic	ntf2	NTf2 derivatives	water	water	477.487	18.015	353.6	FALSE		0.3986		0.946141			TRUE	TRUE	TRUE	TRUE	TRUE		0.438166	0.00101733	0.953855	0.0262824	0.45559	0.00093056	0.956861	0.0240927	0.60464	0.00066182	0.975924	0.0172503	0.600969	0.00067865	0.975561	0.0176815		4	3	1	4	3	1
1	1	domanska-2016d	dabco-6	bicyclic	ntf2	NTf2 derivatives	water	water	477.487	18.015	358.6	FALSE		0.378		0.941546			TRUE	TRUE	TRUE	TRUE	TRUE		0.41949	0.00108062	0.95038	0.0278736	0.43638	0.00099123	0.953535	0.0256247	0.591109	0.0007003	0.974565	0.0182357	0.58746	0.00071809	0.974189	0.0186906		4	3	1	4	3	1
1	1	domanska-2016d	dabco-6	bicyclic	ntf2	NTf2 derivatives	water	water	477.487	18.015	364.9	FALSE		0.3517		0.934976			TRUE	TRUE	TRUE	TRUE	TRUE		0.396137	0.00117363	0.945615	0.0302029	0.412312	0.00108033	0.948968	0.0278663	0.573631	0.00075774	0.972722	0.0197031	0.570011	0.00077698	0.972327	0.0201937		4	3	1	4	3	1
1	1	domanska-2016d	dabco-6	bicyclic	ntf2	NTf2 derivatives	water	water	477.487	18.015	370.4	FALSE		0.3281		0.928278			TRUE	TRUE	TRUE	TRUE	TRUE		0.376021	0.00126807	0.941081	0.0325572	0.391546	0.00117079	0.944617	0.030132	0.55804	0.00081692	0.970986	0.0212105	0.554446	0.00083767	0.970573	0.021738		4	3	1	4	3	1
1	1	domanska-2016d	dabco-6	bicyclic	ntf2	NTf2 derivatives	water	water	477.487	18.015	308.4	FALSE			0.000219		0.00577235		TRUE	TRUE	TRUE	TRUE	TRUE		0.596368	0.0007877	0.9751	0.0204668	0.616461	0.00070415	0.977065	0.0183342	0.705683	0.00054605	0.984508	0.0142742	0.701833	0.00056075	0.984224	0.0146531		4	3	1	4	3	1
1	1	domanska-2016d	dabco-6	bicyclic	ntf2	NTf2 derivatives	water	water	477.487	18.015	318.4	FALSE			0.00023		0.00606059		TRUE	TRUE	TRUE	TRUE	TRUE		0.564952	0.00078936	0.971767	0.0205091	0.584859	0.00070872	0.973918	0.0184511	0.687534	0.00053748	0.983142	0.0140532	0.683725	0.00055168	0.982847	0.0144194		4	3	1	4	3	1
1	1	domanska-2016d	dabco-6	bicyclic	ntf2	NTf2 derivatives	water	water	477.487	18.015	328.4	FALSE			0.000245		0.00645339		TRUE	TRUE	TRUE	TRUE	TRUE		0.530798	0.00081872	0.967726	0.0212563	0.550275	0.0007387	0.970088	0.0192172	0.666658	0.0005487	0.981484	0.0143426	0.662886	0.00056298	0.981174	0.0147105		4	3	1	4	3	1
1	1	domanska-2016d	dabco-6	bicyclic	ntf2	NTf2 derivatives	water	water	477.487	18.015	338.3	FALSE			0.000281		0.0073949		TRUE	TRUE	TRUE	TRUE	TRUE		0.495106	0.00087457	0.962951	0.0226747	0.513926	0.00079323	0.965545	0.0206076	0.643711	0.00057823	0.979545	0.0151032	0.639975	0.0005931	0.979216	0.0154858		4	3	1	4	3	1
2	1	shao-2014	im-1,1	imidazolium	ntf2	NTf2 derivatives	1-propanol	alcohols	377.285	60.096	291.41	FALSE			0.0183		0.104769		TRUE	TRUE	TRUE	TRUE	TRUE		0.649346	0.0383792	0.920797	0.20036	0.568381	0.0510358	0.892093	0.252412	0.537697	6.6983e-05	0.879545	0.000420373	0.521034	8.2971e-05	0.872277	0.000520667		1	3	4	1	3	4
2	1	shao-2014	im-1,1	imidazolium	ntf2	NTf2 derivatives	1-propanol	alcohols	377.285	60.096	294.56	FALSE			0.0283		0.154579		TRUE	TRUE	TRUE	TRUE	TRUE		0.623344	0.04252	0.912202	0.218015	0.537847	0.0572435	0.879609	0.275991	0.517265	7.7514e-05	0.870585	0.000486437	0.500268	9.6584e-05	0.862727	0.000606049		1	3	4	1	3	4
2	1	shao-2014	im-1,1	imidazolium	ntf2	NTf2 derivatives	1-propanol	alcohols	377.285	60.096	297.11	FALSE			0.035		0.185469		TRUE	TRUE	TRUE	TRUE	TRUE		0.601197	0.0463062	0.904436	0.233615	0.511746	0.0630814	0.868076	0.297107	0.500252	8.7346e-05	0.86272	0.000548109	0.482995	0.00010941	0.854335	0.000686484		1	3	4	1	3	4
2	1	shao-2014	im-1,1	imidazolium	ntf2	NTf2 derivatives	1-propanol	alcohols	377.285	60.096	299.51	FALSE			0.0403		0.208629		TRUE	TRUE	TRUE	TRUE	TRUE		0.579397	0.0502908	0.896354	0.249501	0.485895	0.0694181	0.855774	0.318949	0.483839	9.7849e-05	0.854755	0.000613983	0.466342	0.00012324	0.845825	0.000773203		1	3	4	1	3	4
2	1	shao-2014	im-1,1	imidazolium	ntf2	NTf2 derivatives	1-propanol	alcohols	377.285	60.096	299.43	FALSE			0.0446		0.226648		TRUE	TRUE	TRUE	TRUE	TRUE		0.58014	0.0501507	0.896637	0.248951	0.48678	0.0691916	0.85621	0.318187	0.484392	9.7478e-05	0.855029	0.000611656	0.466903	0.00012275	0.846118	0.00077013		1	3	4	1	3	4
2	1	shao-2014	im-1,1	imidazolium	ntf2	NTf2 derivatives	1-propanol	alcohols	377.285	60.096	302.33	FALSE			0.0493		0.2456		TRUE	TRUE	TRUE	TRUE	TRUE		0.552515	0.0555972	0.885735	0.269854	0.453651	0.0782231	0.839044	0.347583	0.464022	0.000112	0.844605	0.000702725	0.44625	0.00014208	0.834964	0.000891315		1	3	4	1	3	4
2	1	shao-2014	im-1,1	imidazolium	ntf2	NTf2 derivatives	1-propanol	alcohols	377.285	60.096	302.3	FALSE			0.0533		0.261152		TRUE	TRUE	TRUE	TRUE	TRUE		0.552809	0.0555367	0.885855	0.269627	0.454007	0.0781201	0.839237	0.347259	0.464236	0.00011183	0.844717	0.000701659	0.446469	0.00014186	0.835086	0.000889936		1	3	4	1	3	4
2	1	shao-2014	im-1,1	imidazolium	ntf2	NTf2 derivatives	1-propanol	alcohols	377.285	60.096	303.37	FALSE			0.075		0.337323		TRUE	TRUE	TRUE	TRUE	TRUE		0.54223	0.0577528	0.881465	0.277873	0.441158	0.0819406	0.832101	0.359115	0.456563	0.00011777	0.840623	0.000738905	0.43869	0.00014983	0.830698	0.000939895		1	3	4	1	3	4
2	1	shao-2014	im-1,1	imidazolium	ntf2	NTf2 derivatives	1-propanol	alcohols	377.285	60.096	303.38	FALSE			0.0759		0.340213		TRUE	TRUE	TRUE	TRUE	TRUE		0.54213	0.0577741	0.881423	0.277951	0.441038	0.0819781	0.832034	0.359229	0.456491	0.00011783	0.840584	0.000739282	0.438617	0.00014991	0.830656	0.000940397		1	3	4	1	3	4
2	1	shao-2014	im-1,1	imidazolium	ntf2	NTf2 derivatives	1-propanol	alcohols	377.285	60.096	303.97	FALSE			0.1006		0.41253		TRUE	TRUE	TRUE	TRUE	TRUE		0.5362	0.0590513	0.878906	0.282636	0.433784	0.0842248	0.827873	0.366044	0.452219	0.00012126	0.838261	0.000760788	0.434288	0.00015453	0.828165	0.000969355		1	3	4	1	3	4
2	1	shao-2014	im-1,1	imidazolium	ntf2	NTf2 derivatives	1-propanol	alcohols	377.285	60.096	304.09	FALSE		0.152		0.52948			TRUE	TRUE	TRUE	TRUE	TRUE		0.534985	0.059316	0.878385	0.283601	0.432292	0.0846948	0.827006	0.367456	0.451348	0.00012197	0.837784	0.00076524	0.433405	0.00015549	0.827653	0.000975372		1	3	4	1	3	4
2	1	shao-2014	im-1,1	imidazolium	ntf2	NTf2 derivatives	1-propanol	alcohols	377.285	60.096	303.91	FALSE		0.1752		0.571468			TRUE	TRUE	TRUE	TRUE	TRUE		0.536807	0.0589196	0.879165	0.282155	0.434526	0.0839913	0.828303	0.365341	0.452656	0.0001209	0.838501	0.000758531	0.434729	0.00015405	0.828421	0.000966346		1	3	4	1	3	4
2	1	shao-2014	im-1,1	imidazolium	ntf2	NTf2 derivatives	1-propanol	alcohols	377.285	60.096	303.65	FALSE		0.1931		0.600384			TRUE	TRUE	TRUE	TRUE	TRUE		0.539426	0.0583537	0.88028	0.280083	0.437733	0.0829932	0.83015	0.362322	0.454539	0.00011938	0.839527	0.000749	0.436639	0.000152	0.829522	0.000953497		1	3	4	1	3	4
2	1	shao-2014	im-1,1	imidazolium	ntf2	NTf2 derivatives	1-propanol	alcohols	377.285	60.096	302.88	FALSE		0.2301		0.652333			TRUE	TRUE	TRUE	TRUE	TRUE		0.547102	0.0567226	0.883503	0.274058	0.44709	0.080153	0.835431	0.353609	0.460088	0.00011501	0.842516	0.000721599	0.442263	0.00014612	0.832726	0.00091664		1	3	4	1	3	4
2	1	shao-2014	im-1,1	imidazolium	ntf2	NTf2 derivatives	1-propanol	alcohols	377.285	60.096	302.14	FALSE		0.2544		0.681739			TRUE	TRUE	TRUE	TRUE	TRUE		0.554371	0.0552156	0.886493	0.26842	0.455896	0.0775744	0.840263	0.345538	0.465377	0.00011098	0.845318	0.000696329	0.447624	0.00014071	0.835728	0.000882727		1	3	4	1	3	4
2	1	shao-2014	im-1,1	imidazolium	ntf2	NTf2 derivatives	1-propanol	alcohols	377.285	60.096	299.44	FALSE		0.2957		0.72496			TRUE	TRUE	TRUE	TRUE	TRUE		0.580047	0.0501682	0.896602	0.24902	0.486669	0.0692198	0.856156	0.318282	0.484323	9.7524e-05	0.854995	0.000611944	0.466833	0.00012281	0.846082	0.000770506		1	3	4	1	3	4
2	1	shao-2014	im-1,1	imidazolium	ntf2	NTf2 derivatives	1-propanol	alcohols	377.285	60.096	297.08	FALSE		0.3483		0.770394			TRUE	TRUE	TRUE	TRUE	TRUE		0.601463	0.0462591	0.904532	0.233424	0.512059	0.0630076	0.868219	0.296846	0.500455	8.7223e-05	0.862816	0.000547337	0.4832	0.00010925	0.854437	0.00068548		1	3	4	1	3	4
2	1	shao-2014	im-1,1	imidazolium	ntf2	NTf2 derivatives	1-propanol	alcohols	377.285	60.096	291.46	FALSE		0.4147		0.816451			TRUE	TRUE	TRUE	TRUE	TRUE		0.648944	0.0384408	0.920668	0.200627	0.56791	0.0511269	0.891908	0.252767	0.537378	6.7138e-05	0.879409	0.000421346	0.52071	8.317e-05	0.872132	0.000521915		1	3	4	1	3	4
2	1	shao-2014	im-1,1	imidazolium	ntf2	NTf2 derivatives	1-propanol	alcohols	377.285	60.096	287.52	FALSE		0.4592		0.842041			TRUE	TRUE	TRUE	TRUE	TRUE		0.679505	0.0339448	0.930121	0.180727	0.603764	0.0445655	0.905358	0.226506	0.56207	5.6042e-05	0.889596	0.00035173	0.545843	6.8969e-05	0.882979	0.000432832		1	3	4	1	3	4
2	1	shao-2014	im-1,1	imidazolium	ntf2	NTf2 derivatives	1-propanol	alcohols	377.285	60.096	281.22	FALSE		0.5117		0.868055			TRUE	TRUE	TRUE	TRUE	TRUE		0.724065	0.0280225	0.942772	0.153259	0.656218	0.0361701	0.92298	0.190676	0.599584	4.2136e-05	0.903853	0.000264473	0.584112	5.1395e-05	0.898141	0.000322572		1	3	4	1	3	4
2	2	shao-2014	im-1,1	imidazolium	ntf2	NTf2 derivatives	1-butanol	alcohols	377.285	74.123	318.02	FALSE			0.022		0.102736		TRUE	TRUE	TRUE	TRUE	TRUE		0.546778	0.0746778	0.859957	0.291175	0.623845	0.0553116	0.894086	0.229595	0.655638	2.7688e-05	0.906463	0.000140916	0.657022	2.3323e-05	0.906982	0.000118702		1	3	5	1	3	5
2	2	shao-2014	im-1,1	imidazolium	ntf2	NTf2 derivatives	1-butanol	alcohols	377.285	74.123	322.89	FALSE			0.0355		0.157785		TRUE	TRUE	TRUE	TRUE	TRUE		0.496819	0.0900288	0.834042	0.334922	0.581166	0.065728	0.875973	0.263672	0.63119	3.4098e-05	0.897025	0.000173534	0.633489	2.8537e-05	0.897935	0.000145236		1	3	5	1	3	5
2	2	shao-2014	im-1,1	imidazolium	ntf2	NTf2 derivatives	1-butanol	alcohols	377.285	74.123	324.55	FALSE			0.0405		0.17685		TRUE	TRUE	TRUE	TRUE	TRUE		0.478255	0.0964154	0.823499	0.351961	0.565641	0.069889	0.868911	0.276654	0.622668	3.66e-05	0.89361	0.000186266	0.625283	3.0563e-05	0.894666	0.000155546		1	3	5	1	3	5
2	2	shao-2014	im-1,1	imidazolium	ntf2	NTf2 derivatives	1-butanol	alcohols	377.285	74.123	326.5	FALSE			0.0502		0.211992		TRUE	TRUE	TRUE	TRUE	TRUE		0.455171	0.104952	0.809609	0.373766	0.546699	0.0752741	0.859919	0.292953	0.612538	3.9772e-05	0.889463	0.000202406	0.61553	3.3125e-05	0.890698	0.000168583		1	3	5	1	3	5
2	2	shao-2014	im-1,1	imidazolium	ntf2	NTf2 derivatives	1-butanol	alcohols	377.285	74.123	329.08	FALSE			0.0754		0.293327		TRUE	TRUE	TRUE	TRUE	TRUE		0.421912	0.118567	0.787906	0.406418	0.520334	0.0833993	0.846662	0.316532	0.598944	4.4392e-05	0.883741	0.000225914	0.60244	3.6842e-05	0.88523	0.000187497		1	3	5	1	3	5
2	2	shao-2014	im-1,1	imidazolium	ntf2	NTf2 derivatives	1-butanol	alcohols	377.285	74.123	329.98	FALSE			0.1002		0.361761		TRUE	TRUE	TRUE	TRUE	TRUE		0.409362	0.124159	0.779142	0.419129	0.510753	0.0865562	0.841615	0.325381	0.59415	4.6125e-05	0.881679	0.000234731	0.597826	3.8233e-05	0.883262	0.000194575		1	3	5	1	3	5
2	2	shao-2014	im-1,1	imidazolium	ntf2	NTf2 derivatives	1-butanol	alcohols	377.285	74.123	330.11	FALSE			0.1203		0.410399		TRUE	TRUE	TRUE	TRUE	TRUE		0.4075	0.125012	0.777812	0.421034	0.50935	0.0870276	0.840865	0.326688	0.593456	4.6381e-05	0.881378	0.000236034	0.597158	3.8439e-05	0.882975	0.000195623		1	3	5	1	3	5
2	2	shao-2014	im-1,1	imidazolium	ntf2	NTf2 derivatives	1-butanol	alcohols	377.285	74.123	330.21	FALSE		0.1394		0.451897			TRUE	TRUE	TRUE	TRUE	TRUE		0.406059	0.125676	0.776779	0.422513	0.508269	0.0873933	0.840286	0.327699	0.592921	4.6579e-05	0.881146	0.000237041	0.596643	3.8597e-05	0.882754	0.000196427		1	3	5	1	3	5
2	2	shao-2014	im-1,1	imidazolium	ntf2	NTf2 derivatives	1-butanol	alcohols	377.285	74.123	330.14	FALSE		0.1532		0.4794			TRUE	TRUE	TRUE	TRUE	TRUE		0.407069	0.12521	0.777504	0.421477	0.509025	0.087137	0.840691	0.32699	0.593296	4.644e-05	0.881309	0.000236334	0.597004	3.8486e-05	0.882909	0.000195862		1	3	5	1	3	5
2	2	shao-2014	im-1,1	imidazolium	ntf2	NTf2 derivatives	1-butanol	alcohols	377.285	74.123	329.83	FALSE		0.202		0.563022			TRUE	TRUE	TRUE	TRUE	TRUE		0.411496	0.12319	0.780656	0.416955	0.512365	0.086017	0.842473	0.323881	0.594951	4.5832e-05	0.882025	0.00023324	0.598597	3.7998e-05	0.883592	0.000193379		1	3	5	1	3	5
2	2	shao-2014	im-1,1	imidazolium	ntf2	NTf2 derivatives	1-butanol	alcohols	377.285	74.123	328.66	FALSE		0.252		0.63165			TRUE	TRUE	TRUE	TRUE	TRUE		0.427581	0.116127	0.791757	0.400748	0.524735	0.0819878	0.848938	0.31252	0.60117	4.3605e-05	0.88469	0.000221909	0.604585	3.621e-05	0.886137	0.000184281		1	3	5	1	3	5
2	2	shao-2014	im-1,1	imidazolium	ntf2	NTf2 derivatives	1-butanol	alcohols	377.285	74.123	326.77	FALSE		0.2959		0.681435			TRUE	TRUE	TRUE	TRUE	TRUE		0.451849	0.106239	0.807535	0.37696	0.544012	0.0760672	0.858608	0.295307	0.611126	4.0233e-05	0.888877	0.000204752	0.614171	3.3496e-05	0.890138	0.000170471		1	3	5	1	3	5
2	2	shao-2014	im-1,1	imidazolium	ntf2	NTf2 derivatives	1-butanol	alcohols	377.285	74.123	325.16	FALSE		0.3194		0.704901			TRUE	TRUE	TRUE	TRUE	TRUE		0.471194	0.0989537	0.819346	0.358558	0.559802	0.0715122	0.866184	0.281625	0.619513	3.7565e-05	0.892329	0.000191176	0.622246	3.1343e-05	0.89344	0.000159515		1	3	5	1	3	5
2	2	shao-2014	im-1,1	imidazolium	ntf2	NTf2 derivatives	1-butanol	alcohols	377.285	74.123	322.84	FALSE		0.3597		0.740892			TRUE	TRUE	TRUE	TRUE	TRUE		0.497363	0.089847	0.834343	0.334427	0.581624	0.0656079	0.876177	0.263293	0.631445	3.4025e-05	0.897127	0.000173163	0.633734	2.8478e-05	0.898032	0.000144936		1	3	5	1	3	5
2	2	shao-2014	im-1,1	imidazolium	ntf2	NTf2 derivatives	1-butanol	alcohols	377.285	74.123	321.78	FALSE		0.3796		0.75695			TRUE	TRUE	TRUE	TRUE	TRUE		0.508754	0.0861295	0.840546	0.324194	0.591256	0.0631354	0.880422	0.255406	0.636837	3.2519e-05	0.899252	0.000165499	0.638925	2.7256e-05	0.900068	0.000138717		1	3	5	1	3	5
2	2	shao-2014	im-1,1	imidazolium	ntf2	NTf2 derivatives	1-butanol	alcohols	377.285	74.123	320.14	FALSE		0.4022		0.773988			TRUE	TRUE	TRUE	TRUE	TRUE		0.525767	0.0808311	0.849468	0.309206	0.605763	0.059553	0.886634	0.243753	0.6451	3.0318e-05	0.902458	0.000154299	0.646877	2.5467e-05	0.90314	0.000129613		1	3	5	1	3	5
2	2	shao-2014	im-1,1	imidazolium	ntf2	NTf2 derivatives	1-butanol	alcohols	377.285	74.123	318.4	FALSE		0.4242		0.789468			TRUE	TRUE	TRUE	TRUE	TRUE		0.543087	0.0757289	0.858155	0.294304	0.620658	0.0560421	0.892795	0.232062	0.653761	2.8142e-05	0.905757	0.000143226	0.655214	2.3694e-05	0.906303	0.00012059		1	3	5	1	3	5
2	2	shao-2014	im-1,1	imidazolium	ntf2	NTf2 derivatives	1-butanol	alcohols	377.285	74.123	316.26	FALSE		0.4435		0.802232			TRUE	TRUE	TRUE	TRUE	TRUE		0.563469	0.0700727	0.867901	0.277219	0.63831	0.0520841	0.899828	0.218551	0.664263	2.5675e-05	0.909671	0.000130672	0.66532	2.1679e-05	0.91006	0.000110336		1	3	5	1	3	5
2	2	shao-2014	im-1,1	imidazolium	ntf2	NTf2 derivatives	1-butanol	alcohols	377.285	74.123	310.89	FALSE		0.4915		0.831076			TRUE	TRUE	TRUE	TRUE	TRUE		0.610769	0.0582298	0.888729	0.239379	0.679623	0.0435954	0.915236	0.188321	0.689852	2.0377e-05	0.918841	0.00010371	0.689938	1.7329e-05	0.918871	8.81981e-05		1	3	5	1	3	5
2	3	shao-2014	im-1,1	imidazolium	ntf2	NTf2 derivatives	1-pentanol	alcohols	377.285	88.15	333.6	FALSE			0.0197		0.0791991		TRUE	TRUE	TRUE	TRUE	TRUE		0.640071	0.0790673	0.883874	0.26872	0.692844	0.0596994	0.906142	0.213675	0.725617	2.6751e-05	0.918823	0.000114485	0.746238	1.4914e-05	0.926396	6.38293e-05		1	3	7	1	3	7
2	3	shao-2014	im-1,1	imidazolium	ntf2	NTf2 derivatives	1-pentanol	alcohols	377.285	88.15	340.78	FALSE			0.0315		0.122196		TRUE	TRUE	TRUE	TRUE	TRUE		0.57726	0.100478	0.853897	0.32345	0.638897	0.0752765	0.88335	0.258388	0.694281	3.6138e-05	0.906715	0.000154654	0.717911	1.9959e-05	0.915914	8.54196e-05		1	3	7	1	3	7
2	3	shao-2014	im-1,1	imidazolium	ntf2	NTf2 derivatives	1-pentanol	alcohols	377.285	88.15	342.53	FALSE			0.038		0.144616		TRUE	TRUE	TRUE	TRUE	TRUE		0.560139	0.106971	0.844971	0.338922	0.624485	0.0798499	0.876813	0.270828	0.686374	3.8869e-05	0.903539	0.000166339	0.710761	2.1415e-05	0.913176	9.16505e-05		1	3	7	1	3	7
2	3	shao-2014	im-1,1	imidazolium	ntf2	NTf2 derivatives	1-pentanol	alcohols	377.285	88.15	345.44	FALSE			0.0515		0.188568		TRUE	TRUE	TRUE	TRUE	TRUE		0.529638	0.119338	0.828162	0.367082	0.59925	0.0883333	0.864865	0.293137	0.672999	4.3859e-05	0.89805	0.000187691	0.698668	2.4061e-05	0.908456	0.000102974		1	3	7	1	3	7
2	3	shao-2014	im-1,1	imidazolium	ntf2	NTf2 derivatives	1-pentanol	alcohols	377.285	88.15	348.15	FALSE			0.0721		0.24957		TRUE	TRUE	TRUE	TRUE	TRUE		0.498384	0.133191	0.809613	0.396738	0.574157	0.0974358	0.852305	0.316028	0.660296	4.9063e-05	0.892695	0.000209958	0.687185	2.6803e-05	0.903867	0.000114708		1	3	7	1	3	7
2	3	shao-2014	im-1,1	imidazolium	ntf2	NTf2 derivatives	1-pentanol	alcohols	377.285	88.15	349.39	FALSE			0.0965		0.313723		TRUE	TRUE	TRUE	TRUE	TRUE		0.482906	0.140542	0.799882	0.411726	0.562097	0.102073	0.846009	0.327296	0.654405	5.1642e-05	0.890164	0.000220992	0.681862	2.8156e-05	0.901704	0.000120498		1	3	7	1	3	7
2	3	shao-2014	im-1,1	imidazolium	ntf2	NTf2 derivatives	1-pentanol	alcohols	377.285	88.15	350.06	FALSE			0.1429		0.416429		TRUE	TRUE	TRUE	TRUE	TRUE		0.474166	0.144848	0.794217	0.420279	0.555415	0.104722	0.842445	0.333618	0.651202	5.309e-05	0.888775	0.000227187	0.678968	2.8913e-05	0.900518	0.000123737		1	3	7	1	3	7
2	3	shao-2014	im-1,1	imidazolium	ntf2	NTf2 derivatives	1-pentanol	alcohols	377.285	88.15	350.12	FALSE		0.1488		0.427984			TRUE	TRUE	TRUE	TRUE	TRUE		0.473369	0.145247	0.793694	0.421062	0.55481	0.104964	0.84212	0.334192	0.650915	5.3221e-05	0.88865	0.000227748	0.678707	2.8982e-05	0.900411	0.000124032		1	3	7	1	3	7
2	3	shao-2014	im-1,1	imidazolium	ntf2	NTf2 derivatives	1-pentanol	alcohols	377.285	88.15	349.83	FALSE		0.1987		0.514876			TRUE	TRUE	TRUE	TRUE	TRUE		0.477198	0.143341	0.796197	0.417304	0.557723	0.103801	0.843683	0.331429	0.652303	5.2588e-05	0.889254	0.00022504	0.679963	2.8651e-05	0.900926	0.000122616		1	3	7	1	3	7
2	3	shao-2014	im-1,1	imidazolium	ntf2	NTf2 derivatives	1-pentanol	alcohols	377.285	88.15	349.27	FALSE		0.2501		0.588043			TRUE	TRUE	TRUE	TRUE	TRUE		0.484442	0.139797	0.800865	0.41023	0.563281	0.10161	0.846635	0.326182	0.654977	5.1387e-05	0.890411	0.000219901	0.682379	2.8022e-05	0.901915	0.000119924		1	3	7	1	3	7
2	3	shao-2014	im-1,1	imidazolium	ntf2	NTf2 derivatives	1-pentanol	alcohols	377.285	88.15	348.14	FALSE		0.2957		0.64247			TRUE	TRUE	TRUE	TRUE	TRUE		0.498506	0.133135	0.809688	0.396621	0.574253	0.0973997	0.852354	0.31594	0.660343	4.9043e-05	0.892716	0.000209872	0.687227	2.6793e-05	0.903884	0.000114665		1	3	7	1	3	7
2	3	shao-2014	im-1,1	imidazolium	ntf2	NTf2 derivatives	1-pentanol	alcohols	377.285	88.15	345.71	FALSE		0.3479		0.69544			TRUE	TRUE	TRUE	TRUE	TRUE		0.52666	0.120604	0.826454	0.369872	0.596823	0.0891835	0.863681	0.29532	0.671744	4.4352e-05	0.897527	0.0001898	0.697534	2.4321e-05	0.908007	0.000104086		1	3	7	1	3	7
2	3	shao-2014	im-1,1	imidazolium	ntf2	NTf2 derivatives	1-pentanol	alcohols	377.285	88.15	342.84	FALSE		0.3981		0.738961			TRUE	TRUE	TRUE	TRUE	TRUE		0.557018	0.108188	0.843305	0.341769	0.621874	0.0806988	0.875607	0.273104	0.684963	3.9373e-05	0.902967	0.000168496	0.709485	2.1683e-05	0.912683	9.27974e-05		1	3	7	1	3	7
2	3	shao-2014	im-1,1	imidazolium	ntf2	NTf2 derivatives	1-pentanol	alcohols	377.285	88.15	339.51	FALSE		0.4468		0.775625			TRUE	TRUE	TRUE	TRUE	TRUE		0.589188	0.096131	0.859913	0.312811	0.649026	0.0721727	0.887826	0.249773	0.699955	3.4274e-05	0.908964	0.000146677	0.723039	1.8963e-05	0.917855	8.11572e-05		1	3	7	1	3	7
2	3	shao-2014	im-1,1	imidazolium	ntf2	NTf2 derivatives	1-pentanol	alcohols	377.285	88.15	335.74	FALSE		0.485		0.801221			TRUE	TRUE	TRUE	TRUE	TRUE		0.622453	0.0847194	0.875875	0.283752	0.677577	0.0638786	0.899945	0.226041	0.716467	2.927e-05	0.915364	0.000125265	0.737967	1.6275e-05	0.923395	6.96538e-05		1	3	7	1	3	7
2	4	shao-2014	im-1,1	imidazolium	ntf2	NTf2 derivatives	1-hexanol	alcohols	377.285	102.177	353.46	FALSE			0.0195		0.0684113		TRUE	TRUE	TRUE	TRUE	TRUE		0.699277	0.0800194	0.895683	0.243094	0.721905	0.0710963	0.905529	0.220342	0.757989	1.1414e-05	0.920414	4.21445e-05	0.773749	9.833e-06	0.92662	3.6307e-05		1	3	10	1	3	10
2	4	shao-2014	im-1,1	imidazolium	ntf2	NTf2 derivatives	1-hexanol	alcohols	377.285	102.177	358.59	FALSE			0.0277		0.0951825		TRUE	TRUE	TRUE	TRUE	TRUE		0.664969	0.0929643	0.879935	0.274547	0.688775	0.082801	0.89097	0.250004	0.740061	1.3971e-05	0.913139	5.15855e-05	0.756477	1.203e-05	0.919809	4.44189e-05		1	3	10	1	3	10
2	4	shao-2014	im-1,1	imidazolium	ntf2	NTf2 derivatives	1-hexanol	alcohols	377.285	102.177	360.66	FALSE			0.0368		0.123633		TRUE	TRUE	TRUE	TRUE	TRUE		0.650029	0.0989151	0.872746	0.288425	0.674387	0.0881721	0.884361	0.26311	0.732658	1.5144e-05	0.910066	5.59164e-05	0.74933	1.3037e-05	0.916929	4.8137e-05		1	3	10	1	3	10
2	4	shao-2014	im-1,1	imidazolium	ntf2	NTf2 derivatives	1-hexanol	alcohols	377.285	102.177	362.54	FALSE			0.0447		0.147322		TRUE	TRUE	TRUE	TRUE	TRUE		0.635868	0.104761	0.865736	0.301722	0.660788	0.0934424	0.877944	0.275676	0.725856	1.6287e-05	0.907207	6.01365e-05	0.742752	1.4019e-05	0.914246	5.17627e-05		1	3	10	1	3	10
2	4	shao-2014	im-1,1	imidazolium	ntf2	NTf2 derivatives	1-hexanol	alcohols	377.285	102.177	364.45	FALSE			0.0522		0.168995		TRUE	TRUE	TRUE	TRUE	TRUE		0.620832	0.111185	0.858073	0.31596	0.646374	0.099214	0.870955	0.289113	0.718869	1.753e-05	0.904231	6.47259e-05	0.735987	1.5086e-05	0.911453	5.57023e-05		1	3	10	1	3	10
2	4	shao-2014	im-1,1	imidazolium	ntf2	NTf2 derivatives	1-hexanol	alcohols	377.285	102.177	367.14	FALSE			0.0726		0.22424		TRUE	TRUE	TRUE	TRUE	TRUE		0.598438	0.121211	0.84622	0.33744	0.624956	0.108168	0.860198	0.30932	0.708902	1.9428e-05	0.899921	7.17335e-05	0.726326	1.6715e-05	0.907405	6.17168e-05		1	3	10	1	3	10
2	4	shao-2014	im-1,1	imidazolium	ntf2	NTf2 derivatives	1-hexanol	alcohols	377.285	102.177	367.94	FALSE			0.0746		0.229384		TRUE	TRUE	TRUE	TRUE	TRUE		0.59143	0.124429	0.842397	0.344151	0.618322	0.111047	0.856771	0.315657	0.705911	2.0028e-05	0.898612	7.39487e-05	0.723421	1.723e-05	0.906174	6.36182e-05		1	3	10	1	3	10
2	4	shao-2014	im-1,1	imidazolium	ntf2	NTf2 derivatives	1-hexanol	alcohols	377.285	102.177	368.69	FALSE			0.1019		0.295255		TRUE	TRUE	TRUE	TRUE	TRUE		0.584742	0.127574	0.838697	0.350627	0.612002	0.113853	0.853464	0.321764	0.703096	2.0607e-05	0.897374	7.60864e-05	0.720687	1.7726e-05	0.905009	6.54495e-05		1	3	10	1	3	10
2	4	shao-2014	im-1,1	imidazolium	ntf2	NTf2 derivatives	1-hexanol	alcohols	377.285	102.177	369.79	FALSE		0.1477		0.390202			TRUE	TRUE	TRUE	TRUE	TRUE		0.574663	0.13241	0.833022	0.360425	0.602454	0.118134	0.848386	0.330941	0.698946	2.1483e-05	0.895536	7.93206e-05	0.716657	1.8477e-05	0.903282	6.82223e-05		1	3	10	1	3	10
2	4	shao-2014	im-1,1	imidazolium	ntf2	NTf2 derivatives	1-hexanol	alcohols	377.285	102.177	369.57	FALSE		0.1526		0.399378			TRUE	TRUE	TRUE	TRUE	TRUE		0.576704	0.131421	0.834181	0.358435	0.604382	0.117257	0.849419	0.329075	0.699777	2.1305e-05	0.895905	7.86635e-05	0.717465	1.8324e-05	0.903629	6.76574e-05		1	3	10	1	3	10
2	4	shao-2014	im-1,1	imidazolium	ntf2	NTf2 derivatives	1-hexanol	alcohols	377.285	102.177	369.55	FALSE		0.2023		0.483584			TRUE	TRUE	TRUE	TRUE	TRUE		0.576889	0.131331	0.834286	0.358255	0.604556	0.117178	0.849512	0.328906	0.699853	2.1289e-05	0.895939	7.86044e-05	0.717538	1.8311e-05	0.903661	6.76094e-05		1	3	10	1	3	10
2	4	shao-2014	im-1,1	imidazolium	ntf2	NTf2 derivatives	1-hexanol	alcohols	377.285	102.177	369.34	FALSE		0.2503		0.55213			TRUE	TRUE	TRUE	TRUE	TRUE		0.578826	0.130398	0.83538	0.356372	0.606408	0.116361	0.850501	0.327161	0.700645	2.112e-05	0.89629	7.79804e-05	0.718309	1.8166e-05	0.903991	6.7074e-05		1	3	10	1	3	10
2	4	shao-2014	im-1,1	imidazolium	ntf2	NTf2 derivatives	1-hexanol	alcohols	377.285	102.177	368.49	FALSE		0.2968		0.609143			TRUE	TRUE	TRUE	TRUE	TRUE		0.586538	0.126724	0.839696	0.348884	0.613705	0.113098	0.854359	0.320127	0.703847	2.0451e-05	0.897705	7.55104e-05	0.721417	1.7592e-05	0.905321	6.49548e-05		1	3	10	1	3	10
2	4	shao-2014	im-1,1	imidazolium	ntf2	NTf2 derivatives	1-hexanol	alcohols	377.285	102.177	366.66	FALSE		0.3434		0.658837			TRUE	TRUE	TRUE	TRUE	TRUE		0.602554	0.119331	0.848439	0.333481	0.628875	0.10649	0.862201	0.305592	0.710691	1.9076e-05	0.900701	7.04338e-05	0.728061	1.6413e-05	0.908137	6.06018e-05		1	3	10	1	3	10
2	4	shao-2014	im-1,1	imidazolium	ntf2	NTf2 derivatives	1-hexanol	alcohols	377.285	102.177	365.37	FALSE		0.3767		0.690555			TRUE	TRUE	TRUE	TRUE	TRUE		0.61336	0.114483	0.854178	0.323123	0.63919	0.102155	0.867398	0.295836	0.715477	1.8159e-05	0.902773	6.70482e-05	0.7327	1.5625e-05	0.910084	5.76923e-05		1	3	10	1	3	10
2	4	shao-2014	im-1,1	imidazolium	ntf2	NTf2 derivatives	1-hexanol	alcohols	377.285	102.177	364.37	FALSE		0.3961		0.707765			TRUE	TRUE	TRUE	TRUE	TRUE		0.621476	0.110905	0.858406	0.315348	0.64699	0.0989629	0.871258	0.288536	0.719163	1.7476e-05	0.904357	6.45265e-05	0.736274	1.5039e-05	0.911572	5.55287e-05		1	3	10	1	3	10
2	4	shao-2014	im-1,1	imidazolium	ntf2	NTf2 derivatives	1-hexanol	alcohols	377.285	102.177	361.72	FALSE		0.4288		0.734884			TRUE	TRUE	TRUE	TRUE	TRUE		0.642137	0.102164	0.868863	0.295854	0.666778	0.0910927	0.880791	0.270109	0.728832	1.5779e-05	0.908462	5.82609e-05	0.745631	1.3583e-05	0.915424	5.01529e-05		1	3	10	1	3	10
2	4	shao-2014	im-1,1	imidazolium	ntf2	NTf2 derivatives	1-hexanol	alcohols	377.285	102.177	361.01	FALSE		0.4489		0.750481			TRUE	TRUE	TRUE	TRUE	TRUE		0.647455	0.0999767	0.871486	0.290864	0.671893	0.089123	0.883196	0.265398	0.731398	1.5351e-05	0.909539	5.66807e-05	0.748112	1.3215e-05	0.916435	4.87942e-05		1	3	10	1	3	10
2	4	shao-2014	im-1,1	imidazolium	ntf2	NTf2 derivatives	1-hexanol	alcohols	377.285	102.177	356.77	FALSE		0.4986		0.785952			TRUE	TRUE	TRUE	TRUE	TRUE		0.677545	0.0880928	0.885827	0.262919	0.700909	0.0783997	0.896407	0.239031	0.746489	1.3009e-05	0.915774	4.80336e-05	0.762678	1.1203e-05	0.922278	4.13654e-05		1	3	10	1	3	10
2	5	shao-2014	im-1,1	imidazolium	ntf2	NTf2 derivatives	1-heptanol	alcohols	377.285	116.204	373.65	FALSE			0.0217		0.0671791		TRUE	TRUE	TRUE	TRUE	TRUE		0.736498	0.0943564	0.900742	0.252766	0.743798	0.091147	0.904085	0.24563	0.813155	1.0656e-05	0.933906	3.45965e-05	0.805499	1.1042e-05	0.930777	3.58497e-05		1	3	10	1	3	10
2	5	shao-2014	im-1,1	imidazolium	ntf2	NTf2 derivatives	1-heptanol	alcohols	377.285	116.204	378.05	FALSE			0.0319		0.0966446		TRUE	TRUE	TRUE	TRUE	TRUE		0.71212	0.105672	0.889275	0.277264	0.719316	0.102378	0.89271	0.270237	0.800859	1.2576e-05	0.928861	4.08299e-05	0.793	1.3011e-05	0.925584	4.22422e-05		1	3	10	1	3	10
2	5	shao-2014	im-1,1	imidazolium	ntf2	NTf2 derivatives	1-heptanol	alcohols	377.285	116.204	381.51	FALSE			0.0406		0.120799		TRUE	TRUE	TRUE	TRUE	TRUE		0.691409	0.115706	0.879146	0.298159	0.698516	0.11237	0.882663	0.291294	0.790898	1.4301e-05	0.924701	4.64302e-05	0.782891	1.4778e-05	0.921308	4.79788e-05		1	3	10	1	3	10
2	5	shao-2014	im-1,1	imidazolium	ntf2	NTf2 derivatives	1-heptanol	alcohols	377.285	116.204	380.32	FALSE			0.0426		0.12623		TRUE	TRUE	TRUE	TRUE	TRUE		0.698698	0.11213	0.882752	0.290798	0.705835	0.108805	0.88624	0.283868	0.794352	1.3685e-05	0.926151	4.44304e-05	0.786395	1.4147e-05	0.922798	4.59303e-05		1	3	10	1	3	10
2	5	shao-2014	im-1,1	imidazolium	ntf2	NTf2 derivatives	1-heptanol	alcohols	377.285	116.204	384.56	FALSE			0.0622		0.177186		TRUE	TRUE	TRUE	TRUE	TRUE		0.671863	0.125543	0.869242	0.31793	0.678894	0.122193	0.872844	0.311274	0.781908	1.5997e-05	0.920888	5.19363e-05	0.773781	1.6515e-05	0.917393	5.3618e-05		1	3	10	1	3	10
2	5	shao-2014	im-1,1	imidazolium	ntf2	NTf2 derivatives	1-heptanol	alcohols	377.285	116.204	384.33	FALSE			0.0629		0.178933		TRUE	TRUE	TRUE	TRUE	TRUE		0.673383	0.124765	0.870025	0.316391	0.680419	0.121415	0.87362	0.309717	0.782592	1.5863e-05	0.92118	5.15013e-05	0.774476	1.6378e-05	0.917693	5.31733e-05		1	3	10	1	3	10
2	5	shao-2014	im-1,1	imidazolium	ntf2	NTf2 derivatives	1-heptanol	alcohols	377.285	116.204	387.27	FALSE			0.0727		0.202898		TRUE	TRUE	TRUE	TRUE	TRUE		0.653339	0.13521	0.859531	0.336707	0.660315	0.131876	0.863226	0.330303	0.77376	1.7655e-05	0.917384	5.7319e-05	0.765536	1.8213e-05	0.913799	5.91306e-05		1	3	10	1	3	10
2	5	shao-2014	im-1,1	imidazolium	ntf2	NTf2 derivatives	1-heptanol	alcohols	377.285	116.204	387.69	FALSE			0.0775		0.214307		TRUE	TRUE	TRUE	TRUE	TRUE		0.65036	0.136796	0.857939	0.339728	0.65733	0.133468	0.861651	0.333371	0.772484	1.7926e-05	0.916831	5.81988e-05	0.764246	1.849e-05	0.913232	6.00299e-05		1	3	10	1	3	10
2	5	shao-2014	im-1,1	imidazolium	ntf2	NTf2 derivatives	1-heptanol	alcohols	377.285	116.204	389.34	FALSE			0.1028		0.271141		TRUE	TRUE	TRUE	TRUE	TRUE		0.638353	0.143285	0.851432	0.351918	0.645303	0.139987	0.855216	0.345757	0.767439	1.9027e-05	0.914633	6.17732e-05	0.759144	1.9616e-05	0.910979	6.36854e-05		1	3	10	1	3	10
2	5	shao-2014	im-1,1	imidazolium	ntf2	NTf2 derivatives	1-heptanol	alcohols	377.285	116.204	390.54	FALSE		0.1504		0.36498			TRUE	TRUE	TRUE	TRUE	TRUE		0.629294	0.14828	0.846426	0.361122	0.636239	0.145016	0.850272	0.355126	0.763735	1.9865e-05	0.913007	6.44938e-05	0.755403	2.0473e-05	0.909314	6.64676e-05		1	3	10	1	3	10
2	5	shao-2014	im-1,1	imidazolium	ntf2	NTf2 derivatives	1-heptanol	alcohols	377.285	116.204	390.56	FALSE		0.1566		0.37611			TRUE	TRUE	TRUE	TRUE	TRUE		0.62914	0.148366	0.846341	0.361278	0.636085	0.145102	0.850187	0.355283	0.763673	1.988e-05	0.91298	6.45424e-05	0.75534	2.0488e-05	0.909286	6.65163e-05		1	3	10	1	3	10
2	5	shao-2014	im-1,1	imidazolium	ntf2	NTf2 derivatives	1-heptanol	alcohols	377.285	116.204	390.54	FALSE		0.1947		0.439769			TRUE	TRUE	TRUE	TRUE	TRUE		0.629294	0.14828	0.846426	0.361122	0.636239	0.145016	0.850272	0.355126	0.763735	1.9865e-05	0.913007	6.44938e-05	0.755403	2.0473e-05	0.909314	6.64676e-05		1	3	10	1	3	10
2	5	shao-2014	im-1,1	imidazolium	ntf2	NTf2 derivatives	1-heptanol	alcohols	377.285	116.204	390.42	FALSE		0.2464		0.514933			TRUE	TRUE	TRUE	TRUE	TRUE		0.630213	0.14777	0.846938	0.360189	0.637158	0.144501	0.850776	0.354174	0.764107	1.978e-05	0.913171	6.42178e-05	0.755778	2.0386e-05	0.909482	6.61852e-05		1	3	10	1	3	10
2	5	shao-2014	im-1,1	imidazolium	ntf2	NTf2 derivatives	1-heptanol	alcohols	377.285	116.204	389.74	FALSE		0.3036		0.585997			TRUE	TRUE	TRUE	TRUE	TRUE		0.635365	0.144923	0.84979	0.354953	0.642313	0.141636	0.853594	0.348846	0.766207	1.9303e-05	0.914093	6.26692e-05	0.7579	1.9898e-05	0.910426	6.46009e-05		1	3	10	1	3	10
2	5	shao-2014	im-1,1	imidazolium	ntf2	NTf2 derivatives	1-heptanol	alcohols	377.285	116.204	388.78	FALSE		0.3457		0.631733			TRUE	TRUE	TRUE	TRUE	TRUE		0.642485	0.141036	0.853687	0.347724	0.64944	0.137726	0.857445	0.341492	0.769157	1.8646e-05	0.915383	6.05363e-05	0.760881	1.9227e-05	0.911748	6.24225e-05		1	3	10	1	3	10
2	5	shao-2014	im-1,1	imidazolium	ntf2	NTf2 derivatives	1-heptanol	alcohols	377.285	116.204	386.5	FALSE		0.4006		0.684534			TRUE	TRUE	TRUE	TRUE	TRUE		0.658723	0.132365	0.862387	0.331247	0.665712	0.129024	0.866054	0.324765	0.776091	1.7169e-05	0.918391	5.57413e-05	0.767893	1.7715e-05	0.914831	5.75138e-05		1	3	10	1	3	10
2	5	shao-2014	im-1,1	imidazolium	ntf2	NTf2 derivatives	1-heptanol	alcohols	377.285	116.204	383.3	FALSE		0.4506		0.726991			TRUE	TRUE	TRUE	TRUE	TRUE		0.680095	0.121356	0.873455	0.309597	0.687156	0.118008	0.87702	0.302847	0.785644	1.5275e-05	0.922479	4.95924e-05	0.777567	1.5776e-05	0.919027	5.12189e-05		1	3	10	1	3	10
2	5	shao-2014	im-1,1	imidazolium	ntf2	NTf2 derivatives	1-heptanol	alcohols	377.285	116.204	380.69	FALSE		0.4879		0.755699			TRUE	TRUE	TRUE	TRUE	TRUE		0.69645	0.113227	0.881645	0.293066	0.703579	0.109899	0.885142	0.286157	0.793281	1.3873e-05	0.925702	4.50407e-05	0.785309	1.4341e-05	0.922337	4.65601e-05		1	3	10	1	3	10
2	6	shao-2014	im-1,1	imidazolium	ntf2	NTf2 derivatives	1-octanol	alcohols	377.285	130.231	391	FALSE			0.0163		0.0458054		TRUE	TRUE	TRUE	TRUE	TRUE		0.782562	0.102503	0.912484	0.248612	0.784339	0.101656	0.913317	0.24689	0.822891	1.0498e-05	0.930845	3.04126e-05	0.830943	1.0205e-05	0.934381	2.95638e-05		1	3	9	1	3	9
2	6	shao-2014	im-1,1	imidazolium	ntf2	NTf2 derivatives	1-octanol	alcohols	377.285	130.231	395	FALSE			0.0246		0.0680897		TRUE	TRUE	TRUE	TRUE	TRUE		0.765337	0.112023	0.904293	0.267655	0.766633	0.11148	0.904916	0.266584	0.813218	1.2102e-05	0.926542	3.50592e-05	0.821373	1.1767e-05	0.930174	3.40888e-05		1	3	9	1	3	9
2	6	shao-2014	im-1,1	imidazolium	ntf2	NTf2 derivatives	1-octanol	alcohols	377.285	130.231	403	FALSE			0.0368		0.0996543		TRUE	TRUE	TRUE	TRUE	TRUE		0.726915	0.13411	0.88521	0.309724	0.727046	0.13447	0.885277	0.310388	0.79311	1.5983e-05	0.917395	4.63021e-05	0.80142	1.5552e-05	0.921209	4.50535e-05		1	3	9	1	3	9
2	6	shao-2014	im-1,1	imidazolium	ntf2	NTf2 derivatives	1-octanol	alcohols	377.285	130.231	404	FALSE			0.047		0.125015		TRUE	TRUE	TRUE	TRUE	TRUE		0.721686	0.137209	0.882522	0.315403	0.721651	0.13772	0.882504	0.316335	0.790528	1.6539e-05	0.9162	4.79127e-05	0.798852	1.6095e-05	0.920035	4.66265e-05		1	3	9	1	3	9
2	6	shao-2014	im-1,1	imidazolium	ntf2	NTf2 derivatives	1-octanol	alcohols	377.285	130.231	412	FALSE			0.0797		0.200569		TRUE	TRUE	TRUE	TRUE	TRUE		0.675613	0.165531	0.857829	0.364949	0.674056	0.167732	0.856962	0.368631	0.769339	2.166e-05	0.906215	6.27474e-05	0.777746	2.1094e-05	0.910216	6.11078e-05		1	3	9	1	3	9
2	6	shao-2014	im-1,1	imidazolium	ntf2	NTf2 derivatives	1-octanol	alcohols	377.285	130.231	413	FALSE			0.1001		0.243714		TRUE	TRUE	TRUE	TRUE	TRUE		0.669235	0.169601	0.854261	0.371738	0.667462	0.172099	0.853262	0.375865	0.766626	2.2392e-05	0.904913	6.48679e-05	0.775039	2.1809e-05	0.908933	6.3179e-05		1	3	9	1	3	9
2	6	shao-2014	im-1,1	imidazolium	ntf2	NTf2 derivatives	1-octanol	alcohols	377.285	130.231	414	FALSE			0.101		0.245553		TRUE	TRUE	TRUE	TRUE	TRUE		0.662695	0.173815	0.850562	0.378684	0.660697	0.176634	0.849424	0.383285	0.763901	2.3146e-05	0.9036	6.7052e-05	0.772317	2.2546e-05	0.907638	6.5314e-05		1	3	9	1	3	9
2	6	shao-2014	im-1,1	imidazolium	ntf2	NTf2 derivatives	1-octanol	alcohols	377.285	130.231	415	FALSE			0.1513		0.340571		TRUE	TRUE	TRUE	TRUE	TRUE		0.655979	0.17818	0.846722	0.385792	0.653753	0.181355	0.845439	0.390906	0.76116	2.3923e-05	0.902273	6.93028e-05	0.769581	2.3305e-05	0.906331	6.75126e-05		1	3	9	1	3	9
2	6	shao-2014	im-1,1	imidazolium	ntf2	NTf2 derivatives	1-octanol	alcohols	377.285	130.231	415	FALSE		0.1524		0.342492			TRUE	TRUE	TRUE	TRUE	TRUE		0.655979	0.17818	0.846722	0.385792	0.653753	0.181355	0.845439	0.390906	0.76116	2.3923e-05	0.902273	6.93028e-05	0.769581	2.3305e-05	0.906331	6.75126e-05		1	3	9	1	3	9
2	6	shao-2014	im-1,1	imidazolium	ntf2	NTf2 derivatives	1-octanol	alcohols	377.285	130.231	415	FALSE		0.1997		0.419584			TRUE	TRUE	TRUE	TRUE	TRUE		0.655979	0.17818	0.846722	0.385792	0.653753	0.181355	0.845439	0.390906	0.76116	2.3923e-05	0.902273	6.93028e-05	0.769581	2.3305e-05	0.906331	6.75126e-05		1	3	9	1	3	9
2	6	shao-2014	im-1,1	imidazolium	ntf2	NTf2 derivatives	1-octanol	alcohols	377.285	130.231	410	FALSE		0.5055		0.74757			TRUE	TRUE	TRUE	TRUE	TRUE		0.687915	0.157786	0.864605	0.351807	0.686773	0.159464	0.863982	0.354679	0.774722	2.0261e-05	0.908783	5.86948e-05	0.783114	1.9728e-05	0.912743	5.71508e-05		1	3	9	1	3	9
3	1	domanska-2006c	im-1,1	imidazolium	so4-1	sulfates	1-octanol	alcohols	208.236	130.231	322.33	FALSE			0.278		0.381062		TRUE	TRUE	TRUE	TRUE	TRUE		0.922537	0.00988344	0.950107	0.0157104	0.920193	0.010467	0.94855	0.0166322	0.983703	1.3914e-05	0.989745	2.22479e-05	0.983568	1.2147e-05	0.98966	1.94226e-05		1	1	9	1	1	9
3	1	domanska-2006c	im-1,1	imidazolium	so4-1	sulfates	1-octanol	alcohols	208.236	130.231	325.69	FALSE			0.296		0.40202		TRUE	TRUE	TRUE	TRUE	TRUE		0.922457	0.0102791	0.950054	0.0163354	0.920102	0.010878	0.94849	0.017281	0.982877	1.5972e-05	0.989222	2.55386e-05	0.982699	1.4001e-05	0.98911	2.2387e-05		1	1	9	1	1	9
3	1	domanska-2006c	im-1,1	imidazolium	so4-1	sulfates	1-octanol	alcohols	208.236	130.231	329.33	FALSE			0.314		0.422597		TRUE	TRUE	TRUE	TRUE	TRUE		0.922342	0.0107175	0.949977	0.0170277	0.919976	0.0113333	0.948406	0.0179995	0.981944	1.8504e-05	0.988631	2.95871e-05	0.981716	1.6288e-05	0.988487	2.60438e-05		1	1	9	1	1	9
3	1	domanska-2006c	im-1,1	imidazolium	so4-1	sulfates	1-octanol	alcohols	208.236	130.231	332.45	FALSE			0.3296		0.44013		TRUE	TRUE	TRUE	TRUE	TRUE		0.92222	0.0111013	0.949896	0.0176335	0.919845	0.0117316	0.948319	0.0186277	0.981112	2.0953e-05	0.988103	3.35029e-05	0.980837	1.8506e-05	0.987929	2.95903e-05		1	1	9	1	1	9
3	1	domanska-2006c	im-1,1	imidazolium	so4-1	sulfates	1-octanol	alcohols	208.236	130.231	337.03	FALSE			0.3555		0.468644		TRUE	TRUE	TRUE	TRUE	TRUE		0.922004	0.011678	0.949753	0.0185431	0.919616	0.0123295	0.948167	0.01957	0.979834	2.5074e-05	0.987292	4.00921e-05	0.979484	2.2251e-05	0.98707	3.55783e-05		1	1	9	1	1	9
3	1	domanska-2006c	im-1,1	imidazolium	so4-1	sulfates	1-octanol	alcohols	208.236	130.231	339.47	FALSE			0.3873		0.502672		TRUE	TRUE	TRUE	TRUE	TRUE		0.921871	0.0119915	0.949665	0.0190374	0.919477	0.0126544	0.948074	0.0200818	0.979125	2.7554e-05	0.986842	4.40574e-05	0.978731	2.4509e-05	0.986591	3.91887e-05		1	1	9	1	1	9
3	1	domanska-2006c	im-1,1	imidazolium	so4-1	sulfates	1-octanol	alcohols	208.236	130.231	341.56	FALSE			0.4159		0.532388		TRUE	TRUE	TRUE	TRUE	TRUE		0.921748	0.0122635	0.949583	0.019466	0.919348	0.0129361	0.947989	0.0205254	0.978502	2.9851e-05	0.986446	4.77301e-05	0.978068	2.6605e-05	0.98617	4.254e-05		1	1	9	1	1	9
3	1	domanska-2006c	im-1,1	imidazolium	so4-1	sulfates	1-octanol	alcohols	208.236	130.231	342.87	FALSE			0.4409		0.557705		TRUE	TRUE	TRUE	TRUE	TRUE		0.921666	0.0124356	0.949529	0.0197372	0.919263	0.0131142	0.947932	0.0208059	0.978103	3.1377e-05	0.986192	5.01701e-05	0.977643	2.7998e-05	0.9859	4.47673e-05		1	1	9	1	1	9
3	1	domanska-2006c	im-1,1	imidazolium	so4-1	sulfates	1-octanol	alcohols	208.236	130.231	342.97	FALSE			0.4425		0.559305		TRUE	TRUE	TRUE	TRUE	TRUE		0.92166	0.0124488	0.949525	0.019758	0.919256	0.0131279	0.947928	0.0208274	0.978072	3.1496e-05	0.986173	5.03603e-05	0.977611	2.8108e-05	0.985879	4.49432e-05		1	1	9	1	1	9
3	1	domanska-2006c	im-1,1	imidazolium	so4-1	sulfates	1-octanol	alcohols	208.236	130.231	343.22	FALSE			0.4439		0.560702		TRUE	TRUE	TRUE	TRUE	TRUE		0.921644	0.0124818	0.949514	0.01981	0.919239	0.013162	0.947917	0.0208811	0.977996	3.1796e-05	0.986124	5.084e-05	0.977529	2.8382e-05	0.985827	4.53813e-05		1	1	9	1	1	9
3	1	domanska-2006c	im-1,1	imidazolium	so4-1	sulfates	1-octanol	alcohols	208.236	130.231	342.97	FALSE			0.4465		0.563294		TRUE	TRUE	TRUE	TRUE	TRUE		0.92166	0.0124488	0.949525	0.019758	0.919256	0.0131279	0.947928	0.0208274	0.978072	3.1496e-05	0.986173	5.03603e-05	0.977611	2.8108e-05	0.985879	4.49432e-05		1	1	9	1	1	9
3	1	domanska-2006c	im-1,1	imidazolium	so4-1	sulfates	1-octanol	alcohols	208.236	130.231	343.2	FALSE			0.4537		0.570436		TRUE	TRUE	TRUE	TRUE	TRUE		0.921645	0.0124792	0.949515	0.0198058	0.919241	0.0131593	0.947917	0.0208768	0.978002	3.1772e-05	0.986128	5.08016e-05	0.977535	2.836e-05	0.985831	4.53461e-05		1	1	9	1	1	9
3	1	domanska-2006c	im-1,1	imidazolium	so4-1	sulfates	1-octanol	alcohols	208.236	130.231	344.18	FALSE			0.4704		0.586817		TRUE	TRUE	TRUE	TRUE	TRUE		0.921581	0.012609	0.949472	0.0200103	0.919174	0.0132936	0.947873	0.0210882	0.977699	3.2973e-05	0.985935	5.27219e-05	0.977212	2.9457e-05	0.985626	4.71001e-05		1	1	9	1	1	9
3	1	domanska-2006c	im-1,1	imidazolium	so4-1	sulfates	1-octanol	alcohols	208.236	130.231	344.62	FALSE			0.4716		0.587985		TRUE	TRUE	TRUE	TRUE	TRUE		0.921552	0.0126675	0.949453	0.0201024	0.919144	0.0133541	0.947853	0.0211835	0.977561	3.3525e-05	0.985848	5.36045e-05	0.977066	2.9962e-05	0.985533	4.79076e-05		1	1	9	1	1	9
3	1	domanska-2006c	im-1,1	imidazolium	so4-1	sulfates	1-octanol	alcohols	208.236	130.231	344.82	FALSE			0.4858		0.601698		TRUE	TRUE	TRUE	TRUE	TRUE		0.921538	0.0126941	0.949444	0.0201444	0.91913	0.0133817	0.947844	0.0212268	0.977499	3.3779e-05	0.985808	5.40107e-05	0.976999	3.0194e-05	0.98549	4.82786e-05		1	1	9	1	1	9
3	1	domanska-2006c	im-1,1	imidazolium	so4-1	sulfates	1-octanol	alcohols	208.236	130.231	345.85	FALSE			0.5047		0.619674		TRUE	TRUE	TRUE	TRUE	TRUE		0.921468	0.0128318	0.949397	0.0203612	0.919056	0.0135241	0.947795	0.0214509	0.977174	3.5113e-05	0.985601	5.61436e-05	0.976652	3.1415e-05	0.985269	5.02308e-05		1	1	9	1	1	9
3	1	domanska-2006c	im-1,1	imidazolium	so4-1	sulfates	1-octanol	alcohols	208.236	130.231	345.83	FALSE		0.5792		0.687585			TRUE	TRUE	TRUE	TRUE	TRUE		0.921469	0.0128291	0.949398	0.020357	0.919058	0.0135213	0.947796	0.0214465	0.97718	3.5087e-05	0.985605	5.6102e-05	0.976659	3.1391e-05	0.985274	5.01925e-05		1	1	9	1	1	9
3	1	domanska-2006c	im-1,1	imidazolium	so4-1	sulfates	1-octanol	alcohols	208.236	130.231	345.47	FALSE		0.5827		0.690665			TRUE	TRUE	TRUE	TRUE	TRUE		0.921494	0.0127809	0.949415	0.0202811	0.919084	0.0134714	0.947813	0.0213681	0.977294	3.4615e-05	0.985678	5.53473e-05	0.976781	3.096e-05	0.985351	4.95033e-05		1	1	9	1	1	9
3	1	domanska-2006c	im-1,1	imidazolium	so4-1	sulfates	1-octanol	alcohols	208.236	130.231	342.59	FALSE		0.6276		0.729344			TRUE	TRUE	TRUE	TRUE	TRUE		0.921684	0.0123987	0.949541	0.0196791	0.919281	0.013076	0.947944	0.0207458	0.978189	3.1045e-05	0.986247	4.96392e-05	0.977735	2.7695e-05	0.985958	4.42829e-05		1	1	9	1	1	9
3	1	domanska-2006c	im-1,1	imidazolium	so4-1	sulfates	1-octanol	alcohols	208.236	130.231	341.56	FALSE		0.668		0.762877			TRUE	TRUE	TRUE	TRUE	TRUE		0.921748	0.0122635	0.949583	0.019466	0.919348	0.0129361	0.947989	0.0205254	0.978502	2.9851e-05	0.986446	4.77301e-05	0.978068	2.6605e-05	0.98617	4.254e-05		1	1	9	1	1	9
3	1	domanska-2006c	im-1,1	imidazolium	so4-1	sulfates	1-octanol	alcohols	208.236	130.231	340.35	FALSE		0.6948		0.784489			TRUE	TRUE	TRUE	TRUE	TRUE		0.92182	0.0121056	0.949631	0.0192172	0.919423	0.0127726	0.948039	0.020268	0.978865	2.8501e-05	0.986676	4.55716e-05	0.978454	2.5373e-05	0.986415	4.05702e-05		1	1	9	1	1	9
3	1	domanska-2006c	im-1,1	imidazolium	so4-1	sulfates	1-octanol	alcohols	208.236	130.231	335.96	FALSE		0.744		0.822915			TRUE	TRUE	TRUE	TRUE	TRUE		0.922058	0.0115419	0.949789	0.0183285	0.919673	0.0121884	0.948205	0.0193477	0.980139	2.4052e-05	0.987486	3.8458e-05	0.979807	2.132e-05	0.987275	3.40897e-05		1	1	9	1	1	9
3	1	domanska-2006c	im-1,1	imidazolium	so4-1	sulfates	1-octanol	alcohols	208.236	130.231	335.47	FALSE		0.755		0.831293			TRUE	TRUE	TRUE	TRUE	TRUE		0.922082	0.0114799	0.949805	0.0182308	0.919699	0.0121241	0.948222	0.0192463	0.980277	2.3596e-05	0.987573	3.77289e-05	0.979953	2.0906e-05	0.987368	3.34277e-05		1	1	9	1	1	9
3	1	domanska-2006c	im-1,1	imidazolium	so4-1	sulfates	1-octanol	alcohols	208.236	130.231	333.47	FALSE		0.7872		0.855387			TRUE	TRUE	TRUE	TRUE	TRUE		0.922175	0.0112284	0.949867	0.0178339	0.919798	0.0118635	0.948288	0.0188355	0.980833	2.1814e-05	0.987926	3.48796e-05	0.980543	1.9288e-05	0.987742	3.08407e-05		1	1	9	1	1	9
3	1	domanska-2006c	im-1,1	imidazolium	so4-1	sulfates	1-octanol	alcohols	208.236	130.231	332.04	FALSE		0.8072		0.870036			TRUE	TRUE	TRUE	TRUE	TRUE		0.922237	0.0110505	0.949908	0.0175532	0.919864	0.0116789	0.948332	0.0185445	0.981223	2.0616e-05	0.988174	3.2964e-05	0.980955	1.82e-05	0.988004	2.9101e-05		1	1	9	1	1	9
3	1	domanska-2006c	im-1,1	imidazolium	so4-1	sulfates	1-octanol	alcohols	208.236	130.231	330.49	FALSE		0.8469		0.898426			TRUE	TRUE	TRUE	TRUE	TRUE		0.922299	0.0108594	0.949949	0.0172516	0.91993	0.0114805	0.948376	0.0182317	0.981638	1.9383e-05	0.988437	3.09926e-05	0.981394	1.7083e-05	0.988282	2.7315e-05		1	1	9	1	1	9
3	1	domanska-2006c	im-1,1	imidazolium	so4-1	sulfates	1-octanol	alcohols	208.236	130.231	328.15	FALSE		0.8675		0.912807			TRUE	TRUE	TRUE	TRUE	TRUE		0.922382	0.0105743	0.950004	0.0168016	0.92002	0.0111845	0.948436	0.0177647	0.982251	1.7647e-05	0.988825	2.82168e-05	0.98204	1.5512e-05	0.988692	2.48031e-05		1	1	9	1	1	9
3	1	domanska-2006c	im-1,1	imidazolium	so4-1	sulfates	1-octanol	alcohols	208.236	130.231	325.37	FALSE		0.8949		0.931576			TRUE	TRUE	TRUE	TRUE	TRUE		0.922466	0.010241	0.95006	0.0162753	0.920112	0.0108384	0.948497	0.0172186	0.982957	1.5765e-05	0.989273	2.52076e-05	0.982784	1.3814e-05	0.989163	2.2088e-05		1	1	9	1	1	9
3	1	domanska-2006c	im-1,1	imidazolium	so4-1	sulfates	1-octanol	alcohols	208.236	130.231	323.08	FALSE		0.9233		0.950613			TRUE	TRUE	TRUE	TRUE	TRUE		0.922522	0.00997098	0.950097	0.0158487	0.920175	0.0105579	0.948538	0.0167758	0.983521	1.4352e-05	0.98963	2.29483e-05	0.983377	1.2541e-05	0.989539	2.00526e-05		1	1	9	1	1	9
3	1	domanska-2006c	im-1,1	imidazolium	so4-1	sulfates	1-octanol	alcohols	208.236	130.231	319.26	FALSE		0.9491		0.967548			TRUE	TRUE	TRUE	TRUE	TRUE		0.922587	0.0095297	0.95014	0.0151513	0.920252	0.0100994	0.94859	0.0160516	0.984429	1.2243e-05	0.990205	1.95761e-05	0.984329	1.0648e-05	0.990142	1.70258e-05		1	1	9	1	1	9
3	2	domanska-2006c	im-1,1	imidazolium	so4-1	sulfates	1-nonanol	alcohols	208.236	144.258	351.23	FALSE			0.3755		0.464653		TRUE	TRUE	TRUE	TRUE	TRUE		0.94993	0.0106705	0.964772	0.0153303	0.945845	0.0125288	0.961849	0.0179853	0.988618	2.4161e-05	0.992087	3.4876e-05	0.988302	2.5192e-05	0.991867	3.63642e-05		1	1	7	1	1	7
3	2	domanska-2006c	im-1,1	imidazolium	so4-1	sulfates	1-nonanol	alcohols	208.236	144.258	352.83	FALSE			0.4158		0.506757		TRUE	TRUE	TRUE	TRUE	TRUE		0.949877	0.0108506	0.964733	0.0155878	0.945792	0.0127242	0.961811	0.0182643	0.988346	2.5641e-05	0.991898	3.70123e-05	0.988014	2.6763e-05	0.991666	3.86319e-05		1	1	7	1	1	7
3	2	domanska-2006c	im-1,1	imidazolium	so4-1	sulfates	1-nonanol	alcohols	208.236	144.258	354.26	FALSE			0.4355		0.52688		TRUE	TRUE	TRUE	TRUE	TRUE		0.949826	0.0110129	0.964697	0.0158198	0.945742	0.0129001	0.961775	0.0185153	0.988099	2.7031e-05	0.991725	3.90187e-05	0.987752	2.824e-05	0.991483	4.07638e-05		1	1	7	1	1	7
3	2	domanska-2006c	im-1,1	imidazolium	so4-1	sulfates	1-nonanol	alcohols	208.236	144.258	354.49	FALSE			0.4586		0.550103		TRUE	TRUE	TRUE	TRUE	TRUE		0.949817	0.0110391	0.964691	0.0158573	0.945733	0.0129284	0.961769	0.0185558	0.988059	2.7261e-05	0.991697	3.93507e-05	0.987709	2.8484e-05	0.991453	4.11161e-05		1	1	7	1	1	7
3	2	domanska-2006c	im-1,1	imidazolium	so4-1	sulfates	1-nonanol	alcohols	208.236	144.258	355.42	FALSE			0.477		0.568321		TRUE	TRUE	TRUE	TRUE	TRUE		0.949782	0.0111456	0.964666	0.0160095	0.945699	0.0130435	0.961744	0.01872	0.987896	2.8208e-05	0.991583	4.07177e-05	0.987536	2.9491e-05	0.991332	4.25696e-05		1	1	7	1	1	7
3	2	domanska-2006c	im-1,1	imidazolium	so4-1	sulfates	1-nonanol	alcohols	208.236	144.258	354.5	FALSE		0.512		0.602305			TRUE	TRUE	TRUE	TRUE	TRUE		0.949817	0.0110403	0.964691	0.0158589	0.945733	0.0129297	0.961768	0.0185576	0.988057	2.7271e-05	0.991696	3.93651e-05	0.987707	2.8495e-05	0.991452	4.11319e-05		1	1	7	1	1	7
3	2	domanska-2006c	im-1,1	imidazolium	so4-1	sulfates	1-nonanol	alcohols	208.236	144.258	353.76	FALSE		0.5369		0.625963			TRUE	TRUE	TRUE	TRUE	TRUE		0.949844	0.010956	0.96471	0.0157385	0.94576	0.0128385	0.961788	0.0184274	0.988186	2.6538e-05	0.991786	3.83071e-05	0.987844	2.7716e-05	0.991547	4.00075e-05		1	1	7	1	1	7
3	2	domanska-2006c	im-1,1	imidazolium	so4-1	sulfates	1-nonanol	alcohols	208.236	144.258	353.48	FALSE		0.5799		0.66584			TRUE	TRUE	TRUE	TRUE	TRUE		0.949854	0.0109242	0.964717	0.015693	0.94577	0.012804	0.961795	0.0183782	0.988235	2.6265e-05	0.99182	3.7913e-05	0.987895	2.7426e-05	0.991583	3.95889e-05		1	1	7	1	1	7
3	2	domanska-2006c	im-1,1	imidazolium	so4-1	sulfates	1-nonanol	alcohols	208.236	144.258	353.82	FALSE		0.615		0.697506			TRUE	TRUE	TRUE	TRUE	TRUE		0.949842	0.0109628	0.964708	0.0157482	0.945758	0.0128459	0.961786	0.0184379	0.988176	2.6596e-05	0.991779	3.83908e-05	0.987833	2.7778e-05	0.991539	4.0097e-05		1	1	7	1	1	7
3	2	domanska-2006c	im-1,1	imidazolium	so4-1	sulfates	1-nonanol	alcohols	208.236	144.258	352.38	FALSE		0.6546		0.732313			TRUE	TRUE	TRUE	TRUE	TRUE		0.949892	0.0107998	0.964744	0.0155152	0.945807	0.0126691	0.961822	0.0181857	0.988423	2.5217e-05	0.991951	3.64003e-05	0.988095	2.6313e-05	0.991723	3.79823e-05		1	1	7	1	1	7
3	2	domanska-2006c	im-1,1	imidazolium	so4-1	sulfates	1-nonanol	alcohols	208.236	144.258	351.71	FALSE		0.7042		0.774596			TRUE	TRUE	TRUE	TRUE	TRUE		0.949915	0.0107244	0.96476	0.0154073	0.94583	0.0125873	0.961838	0.0180688	0.988537	2.4597e-05	0.992031	3.55053e-05	0.988216	2.5655e-05	0.991807	3.70325e-05		1	1	7	1	1	7
3	2	domanska-2006c	im-1,1	imidazolium	so4-1	sulfates	1-nonanol	alcohols	208.236	144.258	350.57	FALSE		0.7628		0.82276			TRUE	TRUE	TRUE	TRUE	TRUE		0.949951	0.0105967	0.964787	0.0152248	0.945866	0.0124485	0.961864	0.0178708	0.988728	2.3572e-05	0.992164	3.40258e-05	0.988419	2.4568e-05	0.991948	3.54634e-05		1	1	7	1	1	7
3	2	domanska-2006c	im-1,1	imidazolium	so4-1	sulfates	1-nonanol	alcohols	208.236	144.258	348.92	FALSE		0.7975		0.850409			TRUE	TRUE	TRUE	TRUE	TRUE		0.95	0.0104134	0.964822	0.0149626	0.945915	0.012249	0.961899	0.0175859	0.989001	2.2157e-05	0.992354	3.19833e-05	0.988707	2.3068e-05	0.992149	3.32982e-05		1	1	7	1	1	7
3	2	domanska-2006c	im-1,1	imidazolium	so4-1	sulfates	1-nonanol	alcohols	208.236	144.258	349.63	FALSE		0.8319		0.877205			TRUE	TRUE	TRUE	TRUE	TRUE		0.94998	0.0104921	0.964807	0.0150751	0.945894	0.0123347	0.961884	0.0177082	0.988884	2.2757e-05	0.992273	3.28493e-05	0.988584	2.3703e-05	0.992063	3.42149e-05		1	1	7	1	1	7
3	2	domanska-2006c	im-1,1	imidazolium	so4-1	sulfates	1-nonanol	alcohols	208.236	144.258	347.57	FALSE		0.8745		0.909572			TRUE	TRUE	TRUE	TRUE	TRUE		0.950038	0.0102646	0.964848	0.0147498	0.945952	0.0120868	0.961925	0.0173542	0.98922	2.1055e-05	0.992507	3.03925e-05	0.988939	2.1902e-05	0.992311	3.16152e-05		1	1	7	1	1	7
3	2	domanska-2006c	im-1,1	imidazolium	so4-1	sulfates	1-nonanol	alcohols	208.236	144.258	341.35	FALSE		0.9216		0.944347			TRUE	TRUE	TRUE	TRUE	TRUE		0.950171	0.00959398	0.964944	0.0137902	0.946086	0.0113521	0.962022	0.0163047	0.990186	1.6579e-05	0.99318	2.39316e-05	0.989958	1.7173e-05	0.993022	2.4789e-05		1	1	7	1	1	7
3	2	domanska-2006c	im-1,1	imidazolium	so4-1	sulfates	1-nonanol	alcohols	208.236	144.258	327.8	FALSE		0.9519		0.966178			TRUE	TRUE	TRUE	TRUE	TRUE		0.950237	0.00821694	0.964991	0.0118181	0.946166	0.00982569	0.962079	0.0141218	0.992053	9.6094e-06	0.994481	1.38711e-05	0.991917	9.8563e-06	0.994386	1.42275e-05		1	1	7	1	1	7
3	3	domanska-2006c	im-1,1	imidazolium	so4-1	sulfates	1-decanol	alcohols	208.236	158.285	311.36	FALSE			0.1589		0.199063		TRUE	TRUE	TRUE	TRUE	TRUE		0.967641	0.00532854	0.97521	0.00699833	0.964936	0.00640477	0.973121	0.00840897	0.997507	2.3472e-06	0.998104	3.08792e-06	0.997428	2.6419e-06	0.998044	3.47562e-06		1	1	6	1	1	6
3	3	domanska-2006c	im-1,1	imidazolium	so4-1	sulfates	1-decanol	alcohols	208.236	158.285	314.24	FALSE			0.2042		0.252377		TRUE	TRUE	TRUE	TRUE	TRUE		0.967776	0.00553673	0.975315	0.00727129	0.965094	0.00663335	0.973243	0.00870845	0.997369	2.6798e-06	0.997999	3.52548e-06	0.997286	3.0197e-06	0.997935	3.97264e-06		1	1	6	1	1	6
3	3	domanska-2006c	im-1,1	imidazolium	so4-1	sulfates	1-decanol	alcohols	208.236	158.285	319.14	FALSE			0.2354		0.288272		TRUE	TRUE	TRUE	TRUE	TRUE		0.967971	0.00590234	0.975465	0.00775054	0.965328	0.0070328	0.973424	0.0092317	0.997121	3.3409e-06	0.99781	4.3952e-06	0.997029	3.7714e-06	0.99774	4.96156e-06		1	1	6	1	1	6
3	3	domanska-2006c	im-1,1	imidazolium	so4-1	sulfates	1-decanol	alcohols	208.236	158.285	322.25	FALSE			0.2599		0.316		TRUE	TRUE	TRUE	TRUE	TRUE		0.968073	0.00614167	0.975544	0.00806421	0.965454	0.00729304	0.973522	0.00957252	0.996954	3.8308e-06	0.997683	5.0397e-06	0.996856	4.3288e-06	0.997608	5.69486e-06		1	1	6	1	1	6
3	3	domanska-2006c	im-1,1	imidazolium	so4-1	sulfates	1-decanol	alcohols	208.236	158.285	325.63	FALSE			0.2828		0.341562		TRUE	TRUE	TRUE	TRUE	TRUE		0.968166	0.00640812	0.975616	0.00841336	0.965574	0.00758157	0.973614	0.00995033	0.996764	4.4332e-06	0.997538	5.8322e-06	0.996658	5.0145e-06	0.997458	6.59695e-06		1	1	6	1	1	6
3	3	domanska-2006c	im-1,1	imidazolium	so4-1	sulfates	1-decanol	alcohols	208.236	158.285	329.25	FALSE			0.3023		0.363063		TRUE	TRUE	TRUE	TRUE	TRUE		0.968245	0.00670068	0.975677	0.00879665	0.965681	0.00789715	0.973697	0.0103635	0.99655	5.1686e-06	0.997376	6.79968e-06	0.996436	5.8519e-06	0.997289	7.69861e-06		1	1	6	1	1	6
3	3	domanska-2006c	im-1,1	imidazolium	so4-1	sulfates	1-decanol	alcohols	208.236	158.285	332.76	FALSE			0.3411		0.405133		TRUE	TRUE	TRUE	TRUE	TRUE		0.968304	0.0069915	0.975722	0.0091776	0.965766	0.00820943	0.973762	0.0107722	0.996333	5.9812e-06	0.99721	7.86871e-06	0.99621	6.7774e-06	0.997116	8.91617e-06		1	1	6	1	1	6
3	3	domanska-2006c	im-1,1	imidazolium	so4-1	sulfates	1-decanol	alcohols	208.236	158.285	338.1	FALSE			0.371		0.436924		TRUE	TRUE	TRUE	TRUE	TRUE		0.968359	0.00744723	0.975765	0.00977443	0.965861	0.00869616	0.973836	0.0114092	0.995981	7.4313e-06	0.996942	9.77642e-06	0.995844	8.4295e-06	0.996838	1.10896e-05		1	1	6	1	1	6
3	3	domanska-2006c	im-1,1	imidazolium	so4-1	sulfates	1-decanol	alcohols	208.236	158.285	343.28	FALSE			0.4079		0.475425		TRUE	TRUE	TRUE	TRUE	TRUE		0.968374	0.00790452	0.975777	0.0103731	0.965914	0.0091815	0.973877	0.0120441	0.995615	9.1224e-06	0.996663	1.20012e-05	0.995462	1.0356e-05	0.996547	1.36241e-05		1	1	6	1	1	6
3	3	domanska-2006c	im-1,1	imidazolium	so4-1	sulfates	1-decanol	alcohols	208.236	158.285	349.18	FALSE			0.45		0.518393		TRUE	TRUE	TRUE	TRUE	TRUE		0.968349	0.00844364	0.975758	0.0110787	0.965932	0.00974998	0.973891	0.0127875	0.995167	1.145e-05	0.996322	1.50633e-05	0.994995	1.3009e-05	0.996191	1.71143e-05		1	1	6	1	1	6
3	3	domanska-2006c	im-1,1	imidazolium	so4-1	sulfates	1-decanol	alcohols	208.236	158.285	353.45	FALSE			0.5019		0.570006		TRUE	TRUE	TRUE	TRUE	TRUE		0.968304	0.00884604	0.975723	0.0116052	0.965917	0.0101719	0.973879	0.0133391	0.994821	1.3445e-05	0.996059	1.76878e-05	0.994633	1.5281e-05	0.995915	2.01032e-05		1	1	6	1	1	6
3	3	domanska-2006c	im-1,1	imidazolium	so4-1	sulfates	1-decanol	alcohols	208.236	158.285	355.85	FALSE			0.5288		0.596187		TRUE	TRUE	TRUE	TRUE	TRUE		0.968269	0.00907678	0.975695	0.0119071	0.965899	0.0104129	0.973865	0.0136541	0.994619	1.4694e-05	0.995904	1.9331e-05	0.994421	1.6705e-05	0.995754	2.19766e-05		1	1	6	1	1	6
3	3	domanska-2006c	im-1,1	imidazolium	so4-1	sulfates	1-decanol	alcohols	208.236	158.285	356.55	FALSE			0.5981		0.661913		TRUE	TRUE	TRUE	TRUE	TRUE		0.968257	0.00914471	0.975686	0.0119959	0.965892	0.0104838	0.97386	0.0137467	0.994558	1.5077e-05	0.995858	1.98349e-05	0.994358	1.7141e-05	0.995706	2.25502e-05		1	1	6	1	1	6
3	3	domanska-2006c	im-1,1	imidazolium	so4-1	sulfates	1-decanol	alcohols	208.236	158.285	355.45	FALSE		0.6836		0.739744			TRUE	TRUE	TRUE	TRUE	TRUE		0.968275	0.0090381	0.9757	0.0118565	0.965902	0.0103725	0.973868	0.0136013	0.994653	1.4479e-05	0.99593	1.90481e-05	0.994457	1.646e-05	0.995781	2.16543e-05		1	1	6	1	1	6
3	3	domanska-2006c	im-1,1	imidazolium	so4-1	sulfates	1-decanol	alcohols	208.236	158.285	354.65	FALSE		0.7181		0.770181			TRUE	TRUE	TRUE	TRUE	TRUE		0.968287	0.008961	0.97571	0.0117556	0.965909	0.010292	0.973873	0.0134961	0.994721	1.4057e-05	0.995982	1.8493e-05	0.994528	1.5979e-05	0.995835	2.10215e-05		1	1	6	1	1	6
3	3	domanska-2006c	im-1,1	imidazolium	so4-1	sulfates	1-decanol	alcohols	208.236	158.285	354.65	FALSE		0.7559		0.802914			TRUE	TRUE	TRUE	TRUE	TRUE		0.968287	0.008961	0.97571	0.0117556	0.965909	0.010292	0.973873	0.0134961	0.994721	1.4057e-05	0.995982	1.8493e-05	0.994528	1.5979e-05	0.995835	2.10215e-05		1	1	6	1	1	6
3	3	domanska-2006c	im-1,1	imidazolium	so4-1	sulfates	1-decanol	alcohols	208.236	158.285	353.33	FALSE		0.7787		0.822354			TRUE	TRUE	TRUE	TRUE	TRUE		0.968306	0.00883459	0.975724	0.0115903	0.965918	0.0101599	0.97388	0.0133234	0.994831	1.3385e-05	0.996066	1.76089e-05	0.994644	1.5213e-05	0.995923	2.00138e-05		1	1	6	1	1	6
3	3	domanska-2006c	im-1,1	imidazolium	so4-1	sulfates	1-decanol	alcohols	208.236	158.285	353.98	FALSE		0.7994		0.839811			TRUE	TRUE	TRUE	TRUE	TRUE		0.968297	0.00889671	0.975717	0.0116715	0.965914	0.0102249	0.973877	0.0134083	0.994777	1.3712e-05	0.996025	1.80391e-05	0.994587	1.5586e-05	0.99588	2.05045e-05		1	1	6	1	1	6
3	3	domanska-2006c	im-1,1	imidazolium	so4-1	sulfates	1-decanol	alcohols	208.236	158.285	352.75	FALSE		0.8256		0.861647			TRUE	TRUE	TRUE	TRUE	TRUE		0.968313	0.00877936	0.975729	0.011518	0.965921	0.0101021	0.973883	0.0132479	0.994879	1.3098e-05	0.996103	1.72313e-05	0.994694	1.4887e-05	0.995961	1.95849e-05		1	1	6	1	1	6
3	3	domanska-2006c	im-1,1	imidazolium	so4-1	sulfates	1-decanol	alcohols	208.236	158.285	351.37	FALSE		0.8592		0.889234			TRUE	TRUE	TRUE	TRUE	TRUE		0.968329	0.00864873	0.975742	0.0113471	0.965928	0.00996526	0.973887	0.013069	0.994992	1.2438e-05	0.996189	1.63631e-05	0.994812	1.4134e-05	0.996051	1.85943e-05		1	1	6	1	1	6
3	3	domanska-2006c	im-1,1	imidazolium	so4-1	sulfates	1-decanol	alcohols	208.236	158.285	349.19	FALSE		0.8964		0.919244			TRUE	TRUE	TRUE	TRUE	TRUE		0.968349	0.00844457	0.975758	0.0110799	0.965932	0.00975096	0.973891	0.0127888	0.995166	1.1455e-05	0.996322	1.50699e-05	0.994994	1.3014e-05	0.99619	1.71208e-05		1	1	6	1	1	6
3	3	domanska-2006c	im-1,1	imidazolium	so4-1	sulfates	1-decanol	alcohols	208.236	158.285	346.65	FALSE		0.9304		0.946197			TRUE	TRUE	TRUE	TRUE	TRUE		0.968366	0.00821007	0.97577	0.0107731	0.96593	0.00950416	0.973889	0.0124661	0.995364	1.0395e-05	0.996472	1.36754e-05	0.9952	1.1807e-05	0.996347	1.5533e-05		1	1	6	1	1	6
3	3	domanska-2006c	im-1,1	imidazolium	so4-1	sulfates	1-decanol	alcohols	208.236	158.285	331.13	FALSE		0.9679		0.975411			TRUE	TRUE	TRUE	TRUE	TRUE		0.968279	0.00685558	0.975703	0.00899957	0.965729	0.00806365	0.973734	0.0105814	0.996435	5.5909e-06	0.997288	7.35524e-06	0.996316	6.3329e-06	0.997198	8.3314e-06		1	1	6	1	1	6
3	4	domanska-2006c	im-1,1	imidazolium	so4-1	sulfates	di-n-propylether	ethers	208.236	102.177	359.36	FALSE		0.5698		0.72968			TRUE	TRUE	TRUE	TRUE	TRUE		0.954683	0.00155222	0.977239	0.00315832	0.960947	0.00080784	0.980448	0.00164499	0.977541	4.1013e-08	0.988852	8.35842e-08	0.980258	2.1474e-08	0.990215	4.37639e-08		1	1	4	1	1	4
3	4	domanska-2006c	im-1,1	imidazolium	so4-1	sulfates	di-n-propylether	ethers	208.236	102.177	356.97	FALSE		0.5865		0.742973			TRUE	TRUE	TRUE	TRUE	TRUE		0.954952	0.0014871	0.977377	0.00302603	0.961192	0.00076738	0.980574	0.00156267	0.978106	3.6751e-08	0.989136	7.48983e-08	0.980766	1.9153e-08	0.990469	3.90337e-08		1	1	4	1	1	4
3	4	domanska-2006c	im-1,1	imidazolium	so4-1	sulfates	di-n-propylether	ethers	208.236	102.177	355.48	FALSE		0.6		0.753512			TRUE	TRUE	TRUE	TRUE	TRUE		0.955112	0.00144778	0.977459	0.00294614	0.961338	0.00074307	0.980648	0.0015132	0.978451	3.4301e-08	0.989309	6.99052e-08	0.981076	1.7824e-08	0.990624	3.63252e-08		1	1	4	1	1	4
3	4	domanska-2006c	im-1,1	imidazolium	so4-1	sulfates	di-n-propylether	ethers	208.236	102.177	354.39	FALSE		0.6081		0.759748			TRUE	TRUE	TRUE	TRUE	TRUE		0.955226	0.00141962	0.977518	0.00288892	0.961441	0.00072572	0.980701	0.0014779	0.9787	3.2604e-08	0.989434	6.64467e-08	0.9813	1.6906e-08	0.990736	3.44543e-08		1	1	4	1	1	4
3	4	domanska-2006c	im-1,1	imidazolium	so4-1	sulfates	di-n-propylether	ethers	208.236	102.177	353.28	FALSE		0.6209		0.769473			TRUE	TRUE	TRUE	TRUE	TRUE		0.955338	0.00139147	0.977575	0.00283172	0.961544	0.00070843	0.980753	0.00144271	0.978951	3.0955e-08	0.98956	6.30861e-08	0.981525	1.6015e-08	0.990849	3.26385e-08		1	1	4	1	1	4
3	4	domanska-2006c	im-1,1	imidazolium	so4-1	sulfates	di-n-propylether	ethers	208.236	102.177	352.2	FALSE		0.6409		0.784357			TRUE	TRUE	TRUE	TRUE	TRUE		0.955444	0.00136457	0.97763	0.00277705	0.961641	0.00069195	0.980803	0.00140918	0.979193	2.9423e-08	0.989681	5.99639e-08	0.981742	1.5189e-08	0.990957	3.09551e-08		1	1	4	1	1	4
3	4	domanska-2006c	im-1,1	imidazolium	so4-1	sulfates	di-n-propylether	ethers	208.236	102.177	350.02	FALSE		0.652		0.792458			TRUE	TRUE	TRUE	TRUE	TRUE		0.955648	0.00131173	0.977735	0.00266966	0.961829	0.00065974	0.980899	0.00134363	0.979672	2.6539e-08	0.989921	5.40863e-08	0.982172	1.364e-08	0.991172	2.77982e-08		1	1	4	1	1	4
3	4	domanska-2006c	im-1,1	imidazolium	so4-1	sulfates	di-n-propylether	ethers	208.236	102.177	347.74	FALSE		0.668		0.803942			TRUE	TRUE	TRUE	TRUE	TRUE		0.955848	0.00125852	0.977837	0.00256151	0.962013	0.00062749	0.980993	0.00127799	0.980161	2.38e-08	0.990166	4.85042e-08	0.982612	1.2175e-08	0.991392	2.48126e-08		1	1	4	1	1	4
3	4	domanska-2006c	im-1,1	imidazolium	so4-1	sulfates	di-n-propylether	ethers	208.236	102.177	348.06	FALSE		0.672		0.806778			TRUE	TRUE	TRUE	TRUE	TRUE		0.955821	0.00126586	0.977823	0.00257643	0.961988	0.00063193	0.98098	0.00128702	0.980093	2.4169e-08	0.990132	4.92562e-08	0.982551	1.2371e-08	0.991361	2.5212e-08		1	1	4	1	1	4
3	4	domanska-2006c	im-1,1	imidazolium	so4-1	sulfates	di-n-propylether	ethers	208.236	102.177	345.13	FALSE		0.6969		0.824124			TRUE	TRUE	TRUE	TRUE	TRUE		0.956059	0.00120009	0.977946	0.00244273	0.962208	0.00059233	0.981092	0.00120642	0.980707	2.0982e-08	0.990439	4.27612e-08	0.983102	1.0674e-08	0.991636	2.17535e-08		1	1	4	1	1	4
3	4	domanska-2006c	im-1,1	imidazolium	so4-1	sulfates	di-n-propylether	ethers	208.236	102.177	342.66	FALSE		0.7167		0.837551			TRUE	TRUE	TRUE	TRUE	TRUE		0.956241	0.00114716	0.978039	0.00233512	0.962378	0.00056071	0.981179	0.00114206	0.98121	1.8597e-08	0.990691	3.79006e-08	0.983553	9.4115e-09	0.991862	1.91806e-08		1	1	4	1	1	4
3	4	domanska-2006c	im-1,1	imidazolium	so4-1	sulfates	di-n-propylether	ethers	208.236	102.177	340.49	FALSE		0.7394		0.852559			TRUE	TRUE	TRUE	TRUE	TRUE		0.956386	0.0011025	0.978114	0.00224432	0.962514	0.00053421	0.981249	0.00108811	0.981641	1.6709e-08	0.990907	3.40528e-08	0.983939	8.4162e-09	0.992054	1.71522e-08		1	1	4	1	1	4
3	4	domanska-2006c	im-1,1	imidazolium	so4-1	sulfates	di-n-propylether	ethers	208.236	102.177	338.02	FALSE		0.7509		0.860011			TRUE	TRUE	TRUE	TRUE	TRUE		0.956535	0.0010537	0.97819	0.00214509	0.962655	0.00050545	0.98132	0.00102956	0.98212	1.4772e-08	0.991146	3.01052e-08	0.984369	7.4007e-09	0.992268	1.50826e-08		1	1	4	1	1	4
3	4	domanska-2006c	im-1,1	imidazolium	so4-1	sulfates	di-n-propylether	ethers	208.236	102.177	335.8	FALSE		0.7653		0.869202			TRUE	TRUE	TRUE	TRUE	TRUE		0.956653	0.00101161	0.97825	0.00205949	0.962768	0.00048083	0.981378	0.000979439	0.982539	1.3209e-08	0.991355	2.69198e-08	0.984745	6.5848e-09	0.992456	1.34198e-08		1	1	4	1	1	4
3	4	domanska-2006c	im-1,1	imidazolium	so4-1	sulfates	di-n-propylether	ethers	208.236	102.177	333.88	FALSE		0.782		0.879672			TRUE	TRUE	TRUE	TRUE	TRUE		0.956743	0.00097654	0.978297	0.00198817	0.962855	0.00046044	0.981422	0.000937925	0.982894	1.1979e-08	0.991533	2.44131e-08	0.985062	5.9463e-09	0.992614	1.21185e-08		1	1	4	1	1	4
3	4	domanska-2006c	im-1,1	imidazolium	so4-1	sulfates	di-n-propylether	ethers	208.236	102.177	331.8	FALSE		0.7977		0.889333			TRUE	TRUE	TRUE	TRUE	TRUE		0.956828	0.00093988	0.97834	0.0019136	0.962938	0.00043926	0.981465	0.000894801	0.98327	1.0766e-08	0.99172	2.1941e-08	0.985399	5.3188e-09	0.992782	1.08397e-08		1	1	4	1	1	4
3	4	domanska-2006c	im-1,1	imidazolium	so4-1	sulfates	di-n-propylether	ethers	208.236	102.177	328.86	FALSE		0.8228		0.904426			TRUE	TRUE	TRUE	TRUE	TRUE		0.956924	0.00089038	0.978389	0.00181291	0.963036	0.00041088	0.981515	0.000837014	0.983787	9.2409e-09	0.991978	1.88329e-08	0.985862	4.5346e-09	0.993013	9.24148e-09		1	1	4	1	1	4
3	4	domanska-2006c	im-1,1	imidazolium	so4-1	sulfates	di-n-propylether	ethers	208.236	102.177	325.97	FALSE		0.8381		0.91342			TRUE	TRUE	TRUE	TRUE	TRUE		0.956991	0.00084424	0.978424	0.00171905	0.963108	0.00038468	0.981551	0.000783662	0.984279	7.9362e-09	0.992224	1.61739e-08	0.986303	3.8682e-09	0.993232	7.88336e-09		1	1	4	1	1	4
3	4	domanska-2006c	im-1,1	imidazolium	so4-1	sulfates	di-n-propylether	ethers	208.236	102.177	324.62	FALSE		0.8454		0.917657			TRUE	TRUE	TRUE	TRUE	TRUE		0.957013	0.00082352	0.978435	0.00167689	0.963134	0.000373	0.981564	0.000759877	0.984504	7.3862e-09	0.992336	1.5053e-08	0.986504	3.5887e-09	0.993332	7.31375e-09		1	1	4	1	1	4
3	4	domanska-2006c	im-1,1	imidazolium	so4-1	sulfates	di-n-propylether	ethers	208.236	102.177	324.01	FALSE		0.8507		0.920712			TRUE	TRUE	TRUE	TRUE	TRUE		0.957021	0.00081433	0.978439	0.0016582	0.963144	0.00036783	0.981569	0.000749349	0.984604	7.1493e-09	0.992386	1.45702e-08	0.986594	3.4685e-09	0.993377	7.06878e-09		1	1	4	1	1	4
3	4	domanska-2006c	im-1,1	imidazolium	so4-1	sulfates	di-n-propylether	ethers	208.236	102.177	321.07	FALSE		0.8726		0.93315			TRUE	TRUE	TRUE	TRUE	TRUE		0.957041	0.00077146	0.97845	0.00157097	0.963175	0.00034387	0.981586	0.000700555	0.985079	6.1015e-09	0.992622	1.24348e-08	0.987018	2.9394e-09	0.993588	5.99048e-09		1	1	4	1	1	4
3	4	domanska-2006c	im-1,1	imidazolium	so4-1	sulfates	di-n-propylether	ethers	208.236	102.177	317.68	FALSE		0.8968		0.946553			TRUE	TRUE	TRUE	TRUE	TRUE		0.957026	0.00072489	0.978442	0.00147621	0.963179	0.00031811	0.981587	0.000648092	0.985607	5.0683e-09	0.992885	1.03292e-08	0.98749	2.4216e-09	0.993822	4.9352e-09		1	1	4	1	1	4
3	4	domanska-2006c	im-1,1	imidazolium	so4-1	sulfates	di-n-propylether	ethers	208.236	102.177	315.67	FALSE		0.9187		0.958385			TRUE	TRUE	TRUE	TRUE	TRUE		0.956998	0.00069866	0.978427	0.00142283	0.963164	0.00030374	0.98158	0.000618825	0.98591	4.5337e-09	0.993036	9.23965e-09	0.987761	2.1555e-09	0.993957	4.39289e-09		1	1	4	1	1	4
3	4	domanska-2006c	im-1,1	imidazolium	so4-1	sulfates	di-n-propylether	ethers	208.236	102.177	310.92	FALSE		0.9417		0.970518			TRUE	TRUE	TRUE	TRUE	TRUE		0.956869	0.00064057	0.978361	0.00130461	0.963077	0.00027227	0.981535	0.000554728	0.9866	3.4684e-09	0.99338	7.06857e-09	0.988377	1.6295e-09	0.994263	3.32091e-09		1	1	4	1	1	4
3	4	domanska-2006c	im-1,1	imidazolium	so4-1	sulfates	di-n-propylether	ethers	208.236	102.177	304.48	FALSE		0.9631		0.981547			TRUE	TRUE	TRUE	TRUE	TRUE		0.956551	0.00056996	0.978198	0.00116089	0.962833	0.00023474	0.981411	0.000478282	0.987477	2.3874e-09	0.993816	4.8655e-09	0.989158	1.1033e-09	0.994651	2.24852e-09		1	1	4	1	1	4
3	5	domanska-2006c	im-1,1	imidazolium	so4-1	sulfates	di-n-butylether	ethers	208.236	130.231	407.12	FALSE		0.7662		0.839746			TRUE	TRUE	TRUE	TRUE	TRUE		0.981078	0.0024696	0.988082	0.00394299	0.98403	0.00144238	0.989952	0.00230434	0.991814	9.8525e-08	0.994865	1.57539e-07	0.993178	4.5222e-08	0.995723	7.23088e-08		1	1	5	1	1	5
3	5	domanska-2006c	im-1,1	imidazolium	so4-1	sulfates	di-n-butylether	ethers	208.236	130.231	401.51	FALSE		0.7795		0.849683			TRUE	TRUE	TRUE	TRUE	TRUE		0.981614	0.0022338	0.988422	0.00356702	0.984503	0.00128221	0.990252	0.00204865	0.992385	7.8323e-08	0.995224	1.25236e-07	0.993662	3.5569e-08	0.996027	5.68739e-08		1	1	5	1	1	5
3	5	domanska-2006c	im-1,1	imidazolium	so4-1	sulfates	di-n-butylether	ethers	208.236	130.231	394.64	FALSE		0.7888		0.856568			TRUE	TRUE	TRUE	TRUE	TRUE		0.982224	0.00197041	0.988809	0.00314692	0.985042	0.00110577	0.990593	0.00176693	0.993037	5.8709e-08	0.995634	9.38742e-08	0.994214	2.6303e-08	0.996373	4.20578e-08		1	1	5	1	1	5
3	5	domanska-2006c	im-1,1	imidazolium	so4-1	sulfates	di-n-butylether	ethers	208.236	130.231	380.97	FALSE		0.8115		0.873155			TRUE	TRUE	TRUE	TRUE	TRUE		0.983288	0.0015224	0.989482	0.00243206	0.985986	0.00081288	0.991189	0.00129914	0.994192	3.2259e-08	0.99636	5.15813e-08	0.995189	1.4043e-08	0.996986	2.24544e-08		1	1	5	1	1	5
3	5	domanska-2006c	im-1,1	imidazolium	so4-1	sulfates	di-n-butylether	ethers	208.236	130.231	368.38	FALSE		0.8435		0.89603			TRUE	TRUE	TRUE	TRUE	TRUE		0.98409	0.00118908	0.98999	0.00189995	0.986704	0.00060262	0.991643	0.000963226	0.995103	1.7995e-08	0.996932	2.87735e-08	0.995957	7.6122e-09	0.997468	1.21717e-08		1	1	5	1	1	5
3	5	domanska-2006c	im-1,1	imidazolium	so4-1	sulfates	di-n-butylether	ethers	208.236	130.231	365.51	FALSE		0.8571		0.905576			TRUE	TRUE	TRUE	TRUE	TRUE		0.984248	0.00112257	0.99009	0.00179375	0.986847	0.00056165	0.991734	0.000897762	0.995293	1.568e-08	0.997051	2.50719e-08	0.996116	6.5879e-09	0.997567	1.05339e-08		1	1	5	1	1	5
3	5	domanska-2006c	im-1,1	imidazolium	so4-1	sulfates	di-n-butylether	ethers	208.236	130.231	361.36	FALSE		0.8725		0.916262			TRUE	TRUE	TRUE	TRUE	TRUE		0.984462	0.00103213	0.990225	0.00164933	0.987041	0.00050656	0.991856	0.000809731	0.995555	1.2808e-08	0.997215	2.04797e-08	0.996336	5.3276e-09	0.997705	8.51869e-09		1	1	5	1	1	5
3	5	domanska-2006c	im-1,1	imidazolium	so4-1	sulfates	di-n-butylether	ethers	208.236	130.231	358.4	FALSE		0.8851		0.924909			TRUE	TRUE	TRUE	TRUE	TRUE		0.984602	0.00097158	0.990314	0.00155263	0.987169	0.00047012	0.991937	0.000751498	0.995734	1.1061e-08	0.997328	1.76863e-08	0.996486	4.5674e-09	0.9978	7.30315e-09		1	1	5	1	1	5
3	5	domanska-2006c	im-1,1	imidazolium	so4-1	sulfates	di-n-butylether	ethers	208.236	130.231	354.69	FALSE		0.9056		0.938798			TRUE	TRUE	TRUE	TRUE	TRUE		0.984764	0.00090014	0.990417	0.00143852	0.987318	0.00042761	0.992031	0.000683562	0.995949	9.1771e-09	0.997463	1.46739e-08	0.996667	3.7546e-09	0.997913	6.00351e-09		1	1	5	1	1	5
3	5	domanska-2006c	im-1,1	imidazolium	so4-1	sulfates	di-n-butylether	ethers	208.236	130.231	350.16	FALSE		0.9286		0.954119			TRUE	TRUE	TRUE	TRUE	TRUE		0.984941	0.00081926	0.990528	0.00130933	0.987482	0.00038018	0.992134	0.00060776	0.996199	7.2742e-09	0.997619	1.16313e-08	0.996876	2.9418e-09	0.998044	4.70386e-09		1	1	5	1	1	5
3	5	domanska-2006c	im-1,1	imidazolium	so4-1	sulfates	di-n-butylether	ethers	208.236	130.231	349.17	FALSE		0.9362		0.959122			TRUE	TRUE	TRUE	TRUE	TRUE		0.984976	0.00080248	0.990551	0.00128253	0.987515	0.00037044	0.992155	0.000592193	0.996252	6.9094e-09	0.997653	1.1048e-08	0.99692	2.7871e-09	0.998071	4.4565e-09		1	1	5	1	1	5
3	5	domanska-2006c	im-1,1	imidazolium	so4-1	sulfates	di-n-butylether	ethers	208.236	130.231	344.77	FALSE		0.9614		0.975505			TRUE	TRUE	TRUE	TRUE	TRUE		0.985119	0.00073158	0.990641	0.00116927	0.987651	0.00032971	0.992241	0.000527094	0.996478	5.481e-09	0.997794	8.76398e-09	0.997109	2.1856e-09	0.99819	3.49472e-09		1	1	5	1	1	5
3	5	domanska-2006c	im-1,1	imidazolium	so4-1	sulfates	di-n-butylether	ethers	208.236	130.231	341.67	FALSE		0.98		0.987398			TRUE	TRUE	TRUE	TRUE	TRUE		0.985205	0.00068509	0.990696	0.00109499	0.987734	0.00030339	0.992294	0.000485025	0.99663	4.642e-09	0.99789	7.42244e-09	0.997236	1.8358e-09	0.998269	2.9354e-09		1	1	5	1	1	5
3	6	domanska-2006c	im-1,1	imidazolium	so4-1	sulfates	MTBE	ethers	208.236	88.15	324.13	FALSE		0.6872		0.838444			TRUE	TRUE	TRUE	TRUE	TRUE		0.882996	0.00268691	0.946886	0.00632412	0.882996	0.00268691	0.946886	0.00632412	0.926086	1.0891e-07	0.967318	2.57277e-07	0.926086	1.0891e-07	0.967318	2.57277e-07		1	1	1	1	1	1
3	6	domanska-2006c	im-1,1	imidazolium	so4-1	sulfates	MTBE	ethers	208.236	88.15	322.95	FALSE		0.7155		0.855929			TRUE	TRUE	TRUE	TRUE	TRUE		0.883042	0.00265086	0.946909	0.00623957	0.883042	0.00265086	0.946909	0.00623957	0.926757	1.0319e-07	0.967628	2.43765e-07	0.926757	1.0319e-07	0.967628	2.43765e-07		1	1	1	1	1	1
3	6	domanska-2006c	im-1,1	imidazolium	so4-1	sulfates	MTBE	ethers	208.236	88.15	321.87	FALSE		0.7423		0.871869			TRUE	TRUE	TRUE	TRUE	TRUE		0.883076	0.00261849	0.946925	0.00616365	0.883076	0.00261849	0.946925	0.00616365	0.927364	9.8201e-08	0.967908	2.31979e-07	0.927364	9.8201e-08	0.967908	2.31979e-07		1	1	1	1	1	1
3	6	domanska-2006c	im-1,1	imidazolium	so4-1	sulfates	MTBE	ethers	208.236	88.15	321.33	FALSE		0.756		0.879797			TRUE	TRUE	TRUE	TRUE	TRUE		0.883089	0.00260253	0.946932	0.00612621	0.883089	0.00260253	0.946932	0.00612621	0.927665	9.579e-08	0.968046	2.26284e-07	0.927665	9.579e-08	0.968046	2.26284e-07		1	1	1	1	1	1
3	6	domanska-2006c	im-1,1	imidazolium	so4-1	sulfates	MTBE	ethers	208.236	88.15	320.38	FALSE		0.7759		0.891055			TRUE	TRUE	TRUE	TRUE	TRUE		0.883108	0.00257481	0.946941	0.00606119	0.883108	0.00257481	0.946941	0.00606119	0.928191	9.1678e-08	0.968289	2.1657e-07	0.928191	9.1678e-08	0.968289	2.1657e-07		1	1	1	1	1	1
3	6	domanska-2006c	im-1,1	imidazolium	so4-1	sulfates	MTBE	ethers	208.236	88.15	319.76	FALSE		0.7927		0.900331			TRUE	TRUE	TRUE	TRUE	TRUE		0.883116	0.00255696	0.946945	0.00601932	0.883116	0.00255696	0.946945	0.00601932	0.928531	8.9082e-08	0.968445	2.10438e-07	0.928531	8.9082e-08	0.968445	2.10438e-07		1	1	1	1	1	1
3	6	domanska-2006c	im-1,1	imidazolium	so4-1	sulfates	MTBE	ethers	208.236	88.15	318.56	FALSE		0.8094		0.909352			TRUE	TRUE	TRUE	TRUE	TRUE		0.883125	0.00252296	0.946949	0.00593955	0.883125	0.00252296	0.946949	0.00593955	0.929183	8.4246e-08	0.968745	1.99014e-07	0.929183	8.4246e-08	0.968745	1.99014e-07		1	1	1	1	1	1
3	6	domanska-2006c	im-1,1	imidazolium	so4-1	sulfates	MTBE	ethers	208.236	88.15	318.17	FALSE		0.813		0.911271			TRUE	TRUE	TRUE	TRUE	TRUE		0.883125	0.00251206	0.946949	0.00591398	0.883125	0.00251206	0.946949	0.00591398	0.929393	8.2727e-08	0.968842	1.95425e-07	0.929393	8.2727e-08	0.968842	1.95425e-07		1	1	1	1	1	1
3	6	domanska-2006c	im-1,1	imidazolium	so4-1	sulfates	MTBE	ethers	208.236	88.15	315.68	FALSE		0.8407		0.925744			TRUE	TRUE	TRUE	TRUE	TRUE		0.883099	0.00244423	0.946937	0.00575482	0.883099	0.00244423	0.946937	0.00575482	0.930716	7.36e-08	0.96945	1.73865e-07	0.930716	7.36e-08	0.96945	1.73865e-07		1	1	1	1	1	1
3	6	domanska-2006c	im-1,1	imidazolium	so4-1	sulfates	MTBE	ethers	208.236	88.15	312.43	FALSE		0.8654		0.938226			TRUE	TRUE	TRUE	TRUE	TRUE		0.882992	0.00236013	0.946885	0.00555745	0.882992	0.00236013	0.946885	0.00555745	0.93239	6.3067e-08	0.970218	1.48983e-07	0.93239	6.3067e-08	0.970218	1.48983e-07		1	1	1	1	1	1
3	6	domanska-2006c	im-1,1	imidazolium	so4-1	sulfates	MTBE	ethers	208.236	88.15	309.71	FALSE		0.8774		0.944153			TRUE	TRUE	TRUE	TRUE	TRUE		0.882837	0.0022935	0.946809	0.00540104	0.882837	0.0022935	0.946809	0.00540104	0.933746	5.5327e-08	0.970839	1.30698e-07	0.933746	5.5327e-08	0.970839	1.30698e-07		1	1	1	1	1	1
3	6	domanska-2006c	im-1,1	imidazolium	so4-1	sulfates	MTBE	ethers	208.236	88.15	304.12	FALSE		0.9247		0.966677			TRUE	TRUE	TRUE	TRUE	TRUE		0.882321	0.0021669	0.946557	0.00510378	0.882321	0.0021669	0.946557	0.00510378	0.93641	4.2064e-08	0.972057	9.93674e-08	0.93641	4.2064e-08	0.972057	9.93674e-08		1	1	1	1	1	1
3	6	domanska-2006c	im-1,1	imidazolium	so4-1	sulfates	MTBE	ethers	208.236	88.15	301.88	FALSE		0.9334		0.970681			TRUE	TRUE	TRUE	TRUE	TRUE		0.882036	0.00211994	0.946419	0.0049935	0.882036	0.00211994	0.946419	0.0049935	0.937431	3.7616e-08	0.972522	8.886e-08	0.937431	3.7616e-08	0.972522	8.886e-08		1	1	1	1	1	1
3	6	domanska-2006c	im-1,1	imidazolium	so4-1	sulfates	MTBE	ethers	208.236	88.15	299.52	FALSE		0.9404		0.973872			TRUE	TRUE	TRUE	TRUE	TRUE		0.881687	0.00207273	0.946248	0.00488261	0.881687	0.00207273	0.946248	0.00488261	0.938479	3.3395e-08	0.972999	7.88887e-08	0.938479	3.3395e-08	0.972999	7.88887e-08		1	1	1	1	1	1
3	6	domanska-2006c	im-1,1	imidazolium	so4-1	sulfates	MTBE	ethers	208.236	88.15	296.71	FALSE		0.972		0.987953			TRUE	TRUE	TRUE	TRUE	TRUE		0.881202	0.00201948	0.946012	0.00475751	0.881202	0.00201948	0.946012	0.00475751	0.93969	2.8934e-08	0.97355	6.83505e-08	0.93969	2.8934e-08	0.97355	6.83505e-08		1	1	1	1	1	1
3	7	domanska-2006c	im-1,1	imidazolium	so4-1	sulfates	TAME	ethers	208.236	102.177	302.77	FALSE		0.9654		0.982718			TRUE	TRUE	TRUE	TRUE	TRUE		0.927142	0.00110898	0.962873	0.00225749	0.932067	0.00074962	0.965472	0.00152653	0.970926	1.1594e-08	0.98552	2.36285e-08	0.97328	7.7137e-09	0.986708	1.57205e-08		1	1	2	1	1	2
3	7	domanska-2006c	im-1,1	imidazolium	so4-1	sulfates	TAME	ethers	208.236	102.177	316.82	FALSE		0.9421		0.970726			TRUE	TRUE	TRUE	TRUE	TRUE		0.928009	0.00133806	0.963331	0.00272317	0.932767	0.00093881	0.965841	0.00191143	0.967406	2.3732e-08	0.983737	4.83656e-08	0.969997	1.6033e-08	0.98505	3.26751e-08		1	1	2	1	1	2
3	7	domanska-2006c	im-1,1	imidazolium	so4-1	sulfates	TAME	ethers	208.236	102.177	321.23	FALSE		0.9232		0.960782			TRUE	TRUE	TRUE	TRUE	TRUE		0.928048	0.00142314	0.963352	0.00289607	0.932773	0.00100938	0.965843	0.00205496	0.966179	2.9442e-08	0.983114	6.00026e-08	0.968853	1.9981e-08	0.98447	4.07211e-08		1	1	2	1	1	2
3	7	domanska-2006c	im-1,1	imidazolium	so4-1	sulfates	TAME	ethers	208.236	102.177	325.57	FALSE		0.8988		0.947645			TRUE	TRUE	TRUE	TRUE	TRUE		0.927988	0.00151368	0.96332	0.00308003	0.932686	0.00108466	0.965798	0.00220804	0.964911	3.6255e-08	0.982469	7.38874e-08	0.967671	2.4712e-08	0.983871	5.03629e-08		1	1	2	1	1	2
3	7	domanska-2006c	im-1,1	imidazolium	so4-1	sulfates	TAME	ethers	208.236	102.177	331.16	FALSE		0.8717		0.932644			TRUE	TRUE	TRUE	TRUE	TRUE		0.927772	0.00164083	0.963206	0.00333831	0.932447	0.00119077	0.965672	0.00242378	0.963189	4.7135e-08	0.981593	9.60608e-08	0.966065	3.2303e-08	0.983056	6.58333e-08		1	1	2	1	1	2
3	7	domanska-2006c	im-1,1	imidazolium	so4-1	sulfates	TAME	ethers	208.236	102.177	333.13	FALSE		0.865		0.928867			TRUE	TRUE	TRUE	TRUE	TRUE		0.92766	0.00168862	0.963146	0.00343537	0.93233	0.00123075	0.96561	0.00250506	0.962557	5.1626e-08	0.98127	1.05213e-07	0.965475	3.5448e-08	0.982756	7.22428e-08		1	1	2	1	1	2
3	7	domanska-2006c	im-1,1	imidazolium	so4-1	sulfates	TAME	ethers	208.236	102.177	336.71	FALSE		0.8444		0.917079			TRUE	TRUE	TRUE	TRUE	TRUE		0.92741	0.00177964	0.963014	0.00362021	0.932074	0.00130705	0.965476	0.00266015	0.961375	6.0797e-08	0.980667	1.23904e-07	0.964372	4.1884e-08	0.982195	8.53593e-08		1	1	2	1	1	2
3	7	domanska-2006c	im-1,1	imidazolium	so4-1	sulfates	TAME	ethers	208.236	102.177	341.62	FALSE		0.8078		0.895458			TRUE	TRUE	TRUE	TRUE	TRUE		0.926973	0.00191361	0.962783	0.00389219	0.931636	0.0014197	0.965245	0.00288908	0.959681	7.5788e-08	0.979801	1.54455e-07	0.962792	5.2444e-08	0.98139	1.0688e-07		1	1	2	1	1	2
3	7	domanska-2006c	im-1,1	imidazolium	so4-1	sulfates	TAME	ethers	208.236	102.177	344.82	FALSE		0.7696		0.871917			TRUE	TRUE	TRUE	TRUE	TRUE		0.926632	0.00200688	0.962602	0.0040815	0.931298	0.00149836	0.965067	0.00304891	0.95853	8.7292e-08	0.979212	1.779e-07	0.961718	6.0574e-08	0.980842	1.23449e-07		1	1	2	1	1	2
3	7	domanska-2006c	im-1,1	imidazolium	so4-1	sulfates	TAME	ethers	208.236	102.177	347.98	FALSE		0.744		0.855552			TRUE	TRUE	TRUE	TRUE	TRUE		0.926252	0.00210383	0.962401	0.00427825	0.930924	0.00158031	0.96487	0.00321539	0.957356	1.0019e-07	0.978611	2.04186e-07	0.960622	6.9713e-08	0.980283	1.42075e-07		1	1	2	1	1	2
3	7	domanska-2006c	im-1,1	imidazolium	so4-1	sulfates	TAME	ethers	208.236	102.177	350.66	FALSE		0.7134		0.835335			TRUE	TRUE	TRUE	TRUE	TRUE		0.925897	0.00218995	0.962213	0.00445298	0.930577	0.00165326	0.964687	0.00336356	0.95633	1.1246e-07	0.978085	2.29193e-07	0.959665	7.8428e-08	0.979794	1.59836e-07		1	1	2	1	1	2
3	7	domanska-2006c	im-1,1	imidazolium	so4-1	sulfates	TAME	ethers	208.236	102.177	353.17	FALSE		0.6913		0.820269			TRUE	TRUE	TRUE	TRUE	TRUE		0.925538	0.00227396	0.962023	0.0046234	0.930228	0.00172457	0.964503	0.00350838	0.955345	1.2518e-07	0.977579	2.55116e-07	0.958746	8.7478e-08	0.979323	1.7828e-07		1	1	2	1	1	2
3	7	domanska-2006c	im-1,1	imidazolium	so4-1	sulfates	TAME	ethers	208.236	102.177	356.76	FALSE		0.6521		0.792531			TRUE	TRUE	TRUE	TRUE	TRUE		0.924981	0.00239997	0.961727	0.00487897	0.929687	0.00183174	0.964217	0.00372599	0.953892	1.4565e-07	0.976832	2.96834e-07	0.95739	1.0208e-07	0.978628	2.08038e-07		1	1	2	1	1	2
3	8	domanska-2006c	im-1,1	imidazolium	so4-1	sulfates	2-pentanone	ketones	208.236	86.134	368.81	FALSE		0.5846		0.772846			TRUE	TRUE	TRUE	TRUE	TRUE		0.658633	0.0361561	0.823461	0.0831485	0.658633	0.0361561	0.823461	0.0831485	0.0668116	0.00031853	0.147548	0.000769725	0.0668116	0.00031853	0.147548	0.000769725		1	1	1	1	1	1
3	8	domanska-2006c	im-1,1	imidazolium	so4-1	sulfates	2-pentanone	ketones	208.236	86.134	365.9	FALSE		0.6498		0.817713			TRUE	TRUE	TRUE	TRUE	TRUE		0.661545	0.0350434	0.82534	0.0807108	0.661545	0.0350434	0.82534	0.0807108	0.069735	0.00029068	0.153423	0.000702453	0.069735	0.00029068	0.153423	0.000702453		1	1	1	1	1	1
3	8	domanska-2006c	im-1,1	imidazolium	so4-1	sulfates	2-pentanone	ketones	208.236	86.134	364.63	FALSE		0.6636		0.826661			TRUE	TRUE	TRUE	TRUE	TRUE		0.662783	0.0345699	0.826137	0.0796712	0.662783	0.0345699	0.826137	0.0796712	0.0710462	0.0002793	0.156044	0.000674963	0.0710462	0.0002793	0.156044	0.000674963		1	1	1	1	1	1
3	8	domanska-2006c	im-1,1	imidazolium	so4-1	sulfates	2-pentanone	ketones	208.236	86.134	361.96	FALSE		0.6922		0.844644			TRUE	TRUE	TRUE	TRUE	TRUE		0.665327	0.0335981	0.827768	0.0775335	0.665327	0.0335981	0.827768	0.0775335	0.0738755	0.00025679	0.161669	0.000620585	0.0738755	0.00025679	0.161669	0.000620585		1	1	1	1	1	1
3	8	domanska-2006c	im-1,1	imidazolium	so4-1	sulfates	2-pentanone	ketones	208.236	86.134	356.61	FALSE		0.7213		0.8622			TRUE	TRUE	TRUE	TRUE	TRUE		0.670139	0.0317412	0.830839	0.0734328	0.670139	0.0317412	0.830839	0.0734328	0.0798813	0.0002169	0.173475	0.000524212	0.0798813	0.0002169	0.173475	0.000524212		1	1	1	1	1	1
3	8	domanska-2006c	im-1,1	imidazolium	so4-1	sulfates	2-pentanone	ketones	208.236	86.134	352.02	FALSE		0.7457		0.876379			TRUE	TRUE	TRUE	TRUE	TRUE		0.673983	0.030241	0.833276	0.0701048	0.673983	0.030241	0.833276	0.0701048	0.0854373	0.00018753	0.184238	0.000453249	0.0854373	0.00018753	0.184238	0.000453249		1	1	1	1	1	1
3	8	domanska-2006c	im-1,1	imidazolium	so4-1	sulfates	2-pentanone	ketones	208.236	86.134	344.07	FALSE		0.7819		0.896557			TRUE	TRUE	TRUE	TRUE	TRUE		0.680002	0.0278321	0.837065	0.0647325	0.680002	0.0278321	0.837065	0.0647325	0.0961449	0.00014542	0.204558	0.000351492	0.0961449	0.00014542	0.204558	0.000351492		1	1	1	1	1	1
3	8	domanska-2006c	im-1,1	imidazolium	so4-1	sulfates	2-pentanone	ketones	208.236	86.134	330.6	FALSE		0.8118		0.912497			TRUE	TRUE	TRUE	TRUE	TRUE		0.688351	0.0242532	0.842267	0.0566853	0.688351	0.0242532	0.842267	0.0566853	0.118708	9.3632e-05	0.245649	0.000226333	0.118708	9.3632e-05	0.245649	0.000226333		1	1	1	1	1	1
3	8	domanska-2006c	im-1,1	imidazolium	so4-1	sulfates	2-pentanone	ketones	208.236	86.134	320.92	FALSE		0.8455		0.929727			TRUE	TRUE	TRUE	TRUE	TRUE		0.692859	0.0220315	0.845049	0.0516499	0.692859	0.0220315	0.845049	0.0516499	0.140533	6.7556e-05	0.283311	0.000163307	0.140533	6.7556e-05	0.283311	0.000163307		1	1	1	1	1	1
3	8	domanska-2006c	im-1,1	imidazolium	so4-1	sulfates	2-pentanone	ketones	208.236	86.134	311.04	FALSE		0.8909		0.951788			TRUE	TRUE	TRUE	TRUE	TRUE		0.696113	0.0200346	0.847047	0.0470976	0.696113	0.0200346	0.847047	0.0470976	0.172401	4.7861e-05	0.334937	0.0001157	0.172401	4.7861e-05	0.334937	0.0001157		1	1	1	1	1	1
3	8	domanska-2006c	im-1,1	imidazolium	so4-1	sulfates	2-pentanone	ketones	208.236	86.134	305.4	FALSE		0.9465		0.977154			TRUE	TRUE	TRUE	TRUE	TRUE		0.697325	0.0190073	0.847789	0.044746	0.697325	0.0190073	0.847789	0.044746	0.200001	3.9061e-05	0.376714	9.44279e-05	0.200001	3.9061e-05	0.376714	9.44279e-05		1	1	1	1	1	1
3	9	domanska-2006c	im-1,1	imidazolium	so4-1	sulfates	3-pentanone	ketones	208.236	86.134	367.51	FALSE		0.6186		0.796794			TRUE	TRUE	TRUE	TRUE	TRUE		0.694091	0.0260152	0.845807	0.060657	0.694091	0.0260152	0.845807	0.060657	0.0900078	0.00018337	0.192978	0.000443197	0.0900078	0.00018337	0.192978	0.000443197		1	1	1	1	1	1
3	9	domanska-2006c	im-1,1	imidazolium	so4-1	sulfates	3-pentanone	ketones	208.236	86.134	364.49	FALSE		0.6556		0.821496			TRUE	TRUE	TRUE	TRUE	TRUE		0.696668	0.0251493	0.847387	0.0587075	0.696668	0.0251493	0.847387	0.0587075	0.0941075	0.00016733	0.200734	0.000404438	0.0941075	0.00016733	0.200734	0.000404438		1	1	1	1	1	1
3	9	domanska-2006c	im-1,1	imidazolium	so4-1	sulfates	3-pentanone	ketones	208.236	86.134	361.77	FALSE		0.6888		0.842544			TRUE	TRUE	TRUE	TRUE	TRUE		0.698903	0.0243951	0.848752	0.0570058	0.698903	0.0243951	0.848752	0.0570058	0.0980073	0.00015402	0.208037	0.000372275	0.0980073	0.00015402	0.208037	0.000372275		1	1	1	1	1	1
3	9	domanska-2006c	im-1,1	imidazolium	so4-1	sulfates	3-pentanone	ketones	208.236	86.134	359.18	FALSE		0.7128		0.857147			TRUE	TRUE	TRUE	TRUE	TRUE		0.700957	0.0236991	0.850003	0.0554324	0.700957	0.0236991	0.850003	0.0554324	0.101933	0.00014228	0.215317	0.000343904	0.101933	0.00014228	0.215317	0.000343904		1	1	1	1	1	1
3	9	domanska-2006c	im-1,1	imidazolium	so4-1	sulfates	3-pentanone	ketones	208.236	86.134	355.8	FALSE		0.735		0.87022			TRUE	TRUE	TRUE	TRUE	TRUE		0.703526	0.0228223	0.851563	0.0534456	0.703526	0.0228223	0.851563	0.0534456	0.107403	0.00012819	0.225346	0.000309854	0.107403	0.00012819	0.225346	0.000309854		1	1	1	1	1	1
3	9	domanska-2006c	im-1,1	imidazolium	so4-1	sulfates	3-pentanone	ketones	208.236	86.134	348.34	FALSE		0.7615		0.885308			TRUE	TRUE	TRUE	TRUE	TRUE		0.708751	0.0210073	0.854718	0.0493182	0.708751	0.0210073	0.854718	0.0493182	0.121266	0.00010153	0.250166	0.000245422	0.121266	0.00010153	0.250166	0.000245422		1	1	1	1	1	1
3	9	domanska-2006c	im-1,1	imidazolium	so4-1	sulfates	3-pentanone	ketones	208.236	86.134	343.36	FALSE		0.7789		0.894922			TRUE	TRUE	TRUE	TRUE	TRUE		0.711893	0.0198832	0.856604	0.0467514	0.711893	0.0198832	0.856604	0.0467514	0.132237	8.6646e-05	0.269226	0.000209448	0.132237	8.6646e-05	0.269226	0.000209448		1	1	1	1	1	1
3	9	domanska-2006c	im-1,1	imidazolium	so4-1	sulfates	3-pentanone	ketones	208.236	86.134	339.51	FALSE		0.791		0.901476			TRUE	TRUE	TRUE	TRUE	TRUE		0.714129	0.0190595	0.857941	0.0448656	0.714129	0.0190595	0.857941	0.0448656	0.142067	7.652e-05	0.285885	0.000184973	0.142067	7.652e-05	0.285885	0.000184973		1	1	1	1	1	1
3	9	domanska-2006c	im-1,1	imidazolium	so4-1	sulfates	3-pentanone	ketones	208.236	86.134	334.83	FALSE		0.8066		0.90977			TRUE	TRUE	TRUE	TRUE	TRUE		0.716617	0.0181091	0.859424	0.0426845	0.716617	0.0181091	0.859424	0.0426845	0.156258	6.5645e-05	0.309262	0.000158687	0.156258	6.5645e-05	0.309262	0.000158687		1	1	1	1	1	1
3	9	domanska-2006c	im-1,1	imidazolium	so4-1	sulfates	3-pentanone	ketones	208.236	86.134	327.53	FALSE		0.8295		0.921641			TRUE	TRUE	TRUE	TRUE	TRUE		0.719988	0.0167328	0.861424	0.0395157	0.719988	0.0167328	0.861424	0.0395157	0.186874	5.1387e-05	0.357166	0.000124223	0.186874	5.1387e-05	0.357166	0.000124223		1	1	1	1	1	1
3	9	domanska-2006c	im-1,1	imidazolium	so4-1	sulfates	3-pentanone	ketones	208.236	86.134	322.09	FALSE		0.8526		0.933262			TRUE	TRUE	TRUE	TRUE	TRUE		0.722078	0.0157863	0.86266	0.0373292	0.722078	0.0157863	0.86266	0.0373292	0.224252	4.2578e-05	0.411374	0.00010293	0.224252	4.2578e-05	0.411374	0.00010293		1	1	1	1	1	1
3	9	domanska-2006c	im-1,1	imidazolium	so4-1	sulfates	3-pentanone	ketones	208.236	86.134	312.85	FALSE		0.8871		0.94999			TRUE	TRUE	TRUE	TRUE	TRUE		0.724774	0.0143226	0.864249	0.033937	0.724774	0.0143226	0.864249	0.033937	0.425159	3.0391e-05	0.641329	7.34696e-05	0.425159	3.0391e-05	0.641329	7.34696e-05		1	1	1	1	1	1
3	9	domanska-2006c	im-1,1	imidazolium	so4-1	sulfates	3-pentanone	ketones	208.236	86.134	306.96	FALSE		0.9402		0.974366			TRUE	TRUE	TRUE	TRUE	TRUE		0.725909	0.0134782	0.864916	0.0319737	0.725909	0.0134782	0.864916	0.0319737	0.508243	2.4203e-05	0.714174	5.85107e-05	0.508243	2.4203e-05	0.714174	5.85107e-05		1	1	1	1	1	1
3	10	domanska-2006c	im-1,1	imidazolium	so4-1	sulfates	2-hexanone	ketones	208.236	100.161	394.01	FALSE		0.6758		0.812514			TRUE	TRUE	TRUE	TRUE	TRUE		0.788032	0.0269638	0.885441	0.0544733	0.784164	0.0276871	0.883087	0.0558921	0.12399	0.00024362	0.227359	0.000506356	0.119385	0.00026228	0.219878	0.000545129		1	1	2	1	1	2
3	10	domanska-2006c	im-1,1	imidazolium	so4-1	sulfates	2-hexanone	ketones	208.236	100.161	389.37	FALSE		0.702		0.830438			TRUE	TRUE	TRUE	TRUE	TRUE		0.79143	0.0256083	0.8875	0.0518084	0.78772	0.0262878	0.885252	0.0531453	0.134604	0.00021235	0.244354	0.000441377	0.129523	0.0002286	0.236262	0.000475145		1	1	2	1	1	2
3	10	domanska-2006c	im-1,1	imidazolium	so4-1	sulfates	2-hexanone	ketones	208.236	100.161	381.51	FALSE		0.7386		0.854532			TRUE	TRUE	TRUE	TRUE	TRUE		0.796808	0.0234589	0.890743	0.0475673	0.793355	0.0240702	0.888663	0.0487754	0.157207	0.00016772	0.279436	0.000348629	0.150714	0.00018054	0.269508	0.000375272		1	1	2	1	1	2
3	10	domanska-2006c	im-1,1	imidazolium	so4-1	sulfates	2-hexanone	ketones	208.236	100.161	374.57	FALSE		0.7828		0.882254			TRUE	TRUE	TRUE	TRUE	TRUE		0.801163	0.0217061	0.893354	0.0440944	0.797922	0.0222627	0.891413	0.0451986	0.186299	0.00013555	0.322491	0.000281769	0.176879	0.00014595	0.308798	0.000303384		1	1	2	1	1	2
3	10	domanska-2006c	im-1,1	imidazolium	so4-1	sulfates	2-hexanone	ketones	208.236	100.161	367.71	FALSE		0.8079		0.897368			TRUE	TRUE	TRUE	FALSE	FALSE		0.805104	0.0200989	0.895706	0.0408989	0.802061	0.0206061	0.893891	0.0419086	0.577585	0.00010917	0.739767	0.000226939						1	1	2	1	1	2
3	10	domanska-2006c	im-1,1	imidazolium	so4-1	sulfates	2-hexanone	ketones	208.236	100.161	360.97	FALSE		0.8336		0.912396			TRUE	TRUE	TRUE	TRUE	TRUE		0.80862	0.0186344	0.897795	0.0379775	0.805761	0.0190972	0.896097	0.0389017	0.65539	8.5273e-05	0.79814	0.000177267	0.63788	9.2615e-05	0.785509	0.000192529		1	1	2	1	1	2
3	10	domanska-2006c	im-1,1	imidazolium	so4-1	sulfates	2-hexanone	ketones	208.236	100.161	359.6	FALSE		0.8386		0.915269			TRUE	TRUE	TRUE	TRUE	TRUE		0.809291	0.01835	0.898193	0.0374092	0.806467	0.0188042	0.896517	0.0383167	0.665651	8.1087e-05	0.805413	0.000168566	0.649926	8.8044e-05	0.794229	0.000183027		1	1	2	1	1	2
3	10	domanska-2006c	im-1,1	imidazolium	so4-1	sulfates	2-hexanone	ketones	208.236	100.161	354.59	FALSE		0.8569		0.925647			TRUE	TRUE	TRUE	TRUE	TRUE		0.811622	0.0173469	0.899572	0.0354019	0.808923	0.017771	0.897975	0.036251	0.696744	6.7437e-05	0.826888	0.000140192	0.685138	7.3147e-05	0.818969	0.000152062		1	1	2	1	1	2
3	10	domanska-2006c	im-1,1	imidazolium	so4-1	sulfates	2-hexanone	ketones	208.236	100.161	346.17	FALSE		0.8717		0.933886			TRUE	TRUE	TRUE	TRUE	TRUE		0.815079	0.0157857	0.90161	0.0322691	0.812584	0.0161637	0.90014	0.0330284	0.735695	4.942e-05	0.852658	0.000102739	0.727564	5.3516e-05	0.847379	0.000111254		1	1	2	1	1	2
3	10	domanska-2006c	im-1,1	imidazolium	so4-1	sulfates	2-hexanone	ketones	208.236	100.161	338.91	FALSE		0.8859		0.941664			TRUE	TRUE	TRUE	TRUE	TRUE		0.81759	0.0145579	0.903086	0.0297981	0.815256	0.0148999	0.901715	0.0304869	0.761619	3.7735e-05	0.86915	7.84484e-05	0.755213	4.0811e-05	0.865122	8.48429e-05		1	1	2	1	1	2
3	10	domanska-2006c	im-1,1	imidazolium	so4-1	sulfates	2-hexanone	ketones	208.236	100.161	325.93	FALSE		0.9146		0.957018			TRUE	TRUE	TRUE	TRUE	TRUE		0.820944	0.0126139	0.905051	0.0258723	0.818873	0.0128996	0.903839	0.0264503	0.797621	2.314e-05	0.891232	4.81072e-05	0.793122	2.498e-05	0.888523	5.19323e-05		1	1	2	1	1	2
3	10	domanska-2006c	im-1,1	imidazolium	so4-1	sulfates	2-hexanone	ketones	208.236	100.161	296.99	FALSE		0.9554		0.978039			TRUE	TRUE	TRUE	TRUE	TRUE		0.822598	0.00928316	0.906017	0.0191084	0.821003	0.00947397	0.905086	0.0194972	0.851402	7.3894e-06	0.922552	1.53625e-05	0.849051	7.9558e-06	0.921222	1.65401e-05		1	1	2	1	1	2
3	11	domanska-2006c	im-1,1	imidazolium	so4-1	sulfates	4-heptanone	ketones	208.236	114.188	405.46	FALSE		0.7473		0.843577			TRUE	TRUE	TRUE	TRUE	TRUE		0.889323	0.0149867	0.936116	0.0269969	0.892438	0.0133835	0.938006	0.0241404	0.854445	4.0654e-05	0.914568	7.41351e-05	0.862981	3.7676e-05	0.919908	6.87047e-05		1	1	3	1	1	3
3	11	domanska-2006c	im-1,1	imidazolium	so4-1	sulfates	4-heptanone	ketones	208.236	114.188	399.01	FALSE		0.7748		0.862527			TRUE	TRUE	TRUE	TRUE	TRUE		0.892036	0.0138394	0.937762	0.0249534	0.895069	0.0123354	0.939598	0.0222688	0.865928	3.2843e-05	0.921741	5.98917e-05	0.873457	3.0463e-05	0.926403	5.55517e-05		1	1	3	1	1	3
3	11	domanska-2006c	im-1,1	imidazolium	so4-1	sulfates	4-heptanone	ketones	208.236	114.188	393.39	FALSE		0.7915		0.873782			TRUE	TRUE	TRUE	TRUE	TRUE		0.894253	0.0129017	0.939104	0.0232804	0.897219	0.0114798	0.940896	0.0207387	0.874923	2.7229e-05	0.927306	4.96543e-05	0.881718	2.5268e-05	0.931478	4.60784e-05		1	1	3	1	1	3
3	11	domanska-2006c	im-1,1	imidazolium	so4-1	sulfates	4-heptanone	ketones	208.236	114.188	385.38	FALSE		0.8208		0.893081			TRUE	TRUE	TRUE	TRUE	TRUE		0.897178	0.01166	0.940871	0.0210612	0.900054	0.0103486	0.942603	0.0187125	0.886389	2.0781e-05	0.934331	3.78961e-05	0.89231	1.9292e-05	0.937928	3.51808e-05		1	1	3	1	1	3
3	11	domanska-2006c	im-1,1	imidazolium	so4-1	sulfates	4-heptanone	ketones	208.236	114.188	380.4	FALSE		0.8413		0.906256			TRUE	TRUE	TRUE	TRUE	TRUE		0.898857	0.0109415	0.941883	0.019775	0.90168	0.00969506	0.94358	0.0175401	0.892829	1.753e-05	0.938243	3.19677e-05	0.898288	1.6275e-05	0.94154	2.96791e-05		1	1	3	1	1	3
3	11	domanska-2006c	im-1,1	imidazolium	so4-1	sulfates	4-heptanone	ketones	208.236	114.188	373.28	FALSE		0.8646		0.920916			TRUE	TRUE	TRUE	TRUE	TRUE		0.90107	0.00998191	0.943214	0.0180548	0.903821	0.0088235	0.944864	0.0159747	0.901252	1.3701e-05	0.943323	2.49852e-05	0.906134	1.2718e-05	0.946249	2.31926e-05		1	1	3	1	1	3
3	11	domanska-2006c	im-1,1	imidazolium	so4-1	sulfates	4-heptanone	ketones	208.236	114.188	367.62	FALSE		0.8799		0.930365			TRUE	TRUE	TRUE	TRUE	TRUE		0.902669	0.00927319	0.944174	0.0167826	0.905368	0.00818091	0.945791	0.0148191	0.907364	1.1229e-05	0.946984	2.04773e-05	0.911846	1.0421e-05	0.949656	1.90038e-05		1	1	3	1	1	3
3	11	domanska-2006c	im-1,1	imidazolium	so4-1	sulfates	4-heptanone	ketones	208.236	114.188	358.97	FALSE		0.8977		0.941186			TRUE	TRUE	TRUE	TRUE	TRUE		0.904835	0.00827744	0.945472	0.0149927	0.907459	0.00727977	0.947041	0.0131964	0.915837	8.2382e-06	0.952025	1.50233e-05	0.919787	7.6393e-06	0.954361	1.39311e-05		1	1	3	1	1	3
3	11	domanska-2006c	im-1,1	imidazolium	so4-1	sulfates	4-heptanone	ketones	208.236	114.188	349.64	FALSE		0.9153		0.951707			TRUE	TRUE	TRUE	TRUE	TRUE		0.906783	0.0073142	0.946637	0.0132585	0.909335	0.00641024	0.94816	0.0116285	0.923952	5.8471e-06	0.956815	1.06629e-05	0.927417	5.4158e-06	0.95885	9.87634e-06		1	1	3	1	1	3
3	11	domanska-2006c	im-1,1	imidazolium	so4-1	sulfates	4-heptanone	ketones	208.236	114.188	338.76	FALSE		0.9408		0.966645			TRUE	TRUE	TRUE	TRUE	TRUE		0.908522	0.00632444	0.947676	0.0114736	0.911	0.00551942	0.949152	0.0100198	0.932272	3.8696e-06	0.961689	7.05667e-06	0.935262	3.5779e-06	0.963431	6.52473e-06		1	1	3	1	1	3
3	11	domanska-2006c	im-1,1	imidazolium	so4-1	sulfates	4-heptanone	ketones	208.236	114.188	322.38	FALSE		0.9746		0.98591			TRUE	TRUE	TRUE	TRUE	TRUE		0.909967	0.00507669	0.948537	0.00921943	0.912361	0.0044012	0.949962	0.00799715	0.942863	2.016e-06	0.967839	3.67642e-06	0.945276	1.8576e-06	0.969231	3.38756e-06		1	1	3	1	1	3
3	12	domanska-2006c	im-1,1	imidazolium	so4-1	sulfates	cyclopentanone	ketones	208.236	84.118	396.8	FALSE		0.3944		0.61718			TRUE	TRUE	TRUE	TRUE	TRUE																			1	1	1	1	1	1
3	12	domanska-2006c	im-1,1	imidazolium	so4-1	sulfates	cyclopentanone	ketones	208.236	84.118	387.43	FALSE		0.4337		0.654681			TRUE	TRUE	TRUE	TRUE	TRUE																			1	1	1	1	1	1
3	12	domanska-2006c	im-1,1	imidazolium	so4-1	sulfates	cyclopentanone	ketones	208.236	84.118	382.27	FALSE		0.4522		0.671431			FALSE	FALSE	TRUE	TRUE	FALSE																			1	1	1	1	1	1
3	12	domanska-2006c	im-1,1	imidazolium	so4-1	sulfates	cyclopentanone	ketones	208.236	84.118	376.39	FALSE		0.4722		0.688933			TRUE	TRUE	TRUE	TRUE	TRUE		0.304202	0.144286	0.51976	0.294488	0.304202	0.144286	0.51976	0.294488										1	1	1	1	1	1
3	12	domanska-2006c	im-1,1	imidazolium	so4-1	sulfates	cyclopentanone	ketones	208.236	84.118	371.32	FALSE		0.4925		0.706086			TRUE	TRUE	TRUE	TRUE	TRUE		0.325429	0.129673	0.544264	0.269453	0.325429	0.129673	0.544264	0.269453										1	1	1	1	1	1
3	12	domanska-2006c	im-1,1	imidazolium	so4-1	sulfates	cyclopentanone	ketones	208.236	84.118	364.98	FALSE		0.5164		0.725533			TRUE	TRUE	TRUE	TRUE	TRUE		0.347317	0.115611	0.568466	0.244491	0.347317	0.115611	0.568466	0.244491										1	1	1	1	1	1
3	12	domanska-2006c	im-1,1	imidazolium	so4-1	sulfates	cyclopentanone	ketones	208.236	84.118	358.17	FALSE		0.5397		0.743757			TRUE	TRUE	FALSE	FALSE	FALSE		0.367153	0.10363	0.589525	0.222514	0.367153	0.10363	0.589525	0.222514										1	1	1	1	1	1
3	12	domanska-2006c	im-1,1	imidazolium	so4-1	sulfates	cyclopentanone	ketones	208.236	84.118	349.63	FALSE		0.5685		0.76534			TRUE	TRUE	FALSE	FALSE	FALSE		0.388271	0.0915495	0.611083	0.199662	0.388271	0.0915495	0.611083	0.199662										1	1	1	1	1	1
3	12	domanska-2006c	im-1,1	imidazolium	so4-1	sulfates	cyclopentanone	ketones	208.236	84.118	336.33	FALSE		0.6031		0.789988			TRUE	TRUE	FALSE	FALSE	FALSE		0.414972	0.076995	0.637147	0.171158	0.414972	0.076995	0.637147	0.171158										1	1	1	1	1	1
3	13	domanska-2006a	im-1,1	imidazolium	so4-1	sulfates	n-pentane	alkanes	208.236	72.151	306.32	FALSE		0.7814		0.911634			TRUE	TRUE	TRUE	TRUE	TRUE		0.96921	3.8604e-06	0.989112	1.11415e-05	0.96921	3.8604e-06	0.989112	1.11415e-05	0.991487	7.8564e-20	0.997034	2.26745e-19	0.991487	7.8564e-20	0.997034	2.26745e-19		1	1	1	1	1	1
3	13	domanska-2006a	im-1,1	imidazolium	so4-1	sulfates	n-pentane	alkanes	208.236	72.151	304.48	FALSE		0.7953		0.918121			TRUE	TRUE	TRUE	TRUE	TRUE		0.969231	3.4631e-06	0.98912	9.99484e-06	0.969231	3.4631e-06	0.98912	9.99484e-06	0.991692	5.9494e-20	0.997106	1.71706e-19	0.991692	5.9494e-20	0.997106	1.71706e-19		1	1	1	1	1	1
3	13	domanska-2006a	im-1,1	imidazolium	so4-1	sulfates	n-pentane	alkanes	208.236	72.151	300.77	FALSE		0.8093		0.924518			TRUE	TRUE	TRUE	TRUE	TRUE		0.969249	2.769e-06	0.989127	7.99161e-06	0.969249	2.769e-06	0.989127	7.99161e-06	0.992092	3.3604e-20	0.997246	9.6985e-20	0.992092	3.3604e-20	0.997246	9.6985e-20		1	1	1	1	1	1
3	13	domanska-2006a	im-1,1	imidazolium	so4-1	sulfates	n-pentane	alkanes	208.236	72.151	298.08	FALSE		0.821		0.929763			TRUE	TRUE	TRUE	TRUE	TRUE		0.96924	2.345e-06	0.989123	6.76791e-06	0.96924	2.345e-06	0.989123	6.76791e-06	0.992371	2.2006e-20	0.997343	6.35118e-20	0.992371	2.2006e-20	0.997343	6.35118e-20		1	1	1	1	1	1
3	13	domanska-2006a	im-1,1	imidazolium	so4-1	sulfates	n-pentane	alkanes	208.236	72.151	293.63	FALSE		0.8398		0.938002			TRUE	TRUE	TRUE	TRUE	TRUE		0.969181	1.7676e-06	0.989102	5.10148e-06	0.969181	1.7676e-06	0.989102	5.10148e-06	0.992815	1.0734e-20	0.997499	3.09795e-20	0.992815	1.0734e-20	0.997499	3.09795e-20		1	1	1	1	1	1
3	13	domanska-2006a	im-1,1	imidazolium	so4-1	sulfates	n-pentane	alkanes	208.236	72.151	288.21	FALSE		0.8619		0.947403			TRUE	TRUE	TRUE	TRUE	TRUE		0.969033	1.236e-06	0.989049	3.56723e-06	0.969033	1.236e-06	0.989049	3.56723e-06	0.993324	4.3418e-21	0.997677	1.25309e-20	0.993324	4.3418e-21	0.997677	1.25309e-20		1	1	1	1	1	1
3	14	domanska-2006a	im-1,1	imidazolium	so4-1	sulfates	n-hexane	alkanes	208.236	86.178	341.39	FALSE		0.6977		0.847952			TRUE	TRUE	TRUE	TRUE	TRUE		0.981167	2.494e-05	0.992119	6.02616e-05	0.981158	2.4939e-05	0.992115	6.02592e-05	0.994323	1.6044e-17	0.997643	3.87679e-17	0.994319	1.6046e-17	0.997641	3.87727e-17		1	1	2	1	1	2
3	14	domanska-2006a	im-1,1	imidazolium	so4-1	sulfates	n-hexane	alkanes	208.236	86.178	338.44	FALSE		0.7303		0.867428			TRUE	TRUE	TRUE	TRUE	TRUE		0.981323	2.179e-05	0.992185	5.26506e-05	0.981314	2.179e-05	0.992181	5.26506e-05	0.994555	1.1279e-17	0.997739	2.7254e-17	0.994552	1.1281e-17	0.997738	2.72588e-17		1	1	2	1	1	2
3	14	domanska-2006a	im-1,1	imidazolium	so4-1	sulfates	n-hexane	alkanes	208.236	86.178	336.67	FALSE		0.7527		0.880305			TRUE	TRUE	TRUE	TRUE	TRUE		0.981411	2.0067e-05	0.992222	4.84875e-05	0.981402	2.0067e-05	0.992219	4.84875e-05	0.99469	9.1019e-18	0.997796	2.19934e-17	0.994687	9.103e-18	0.997795	2.1996e-17		1	1	2	1	1	2
3	14	domanska-2006a	im-1,1	imidazolium	so4-1	sulfates	n-hexane	alkanes	208.236	86.178	333.56	FALSE		0.7791		0.894983			TRUE	TRUE	TRUE	TRUE	TRUE		0.981555	1.7319e-05	0.992283	4.18477e-05	0.981548	1.7319e-05	0.99228	4.18477e-05	0.994921	6.2086e-18	0.997892	1.50021e-17	0.994919	6.2092e-18	0.997891	1.50036e-17		1	1	2	1	1	2
3	14	domanska-2006a	im-1,1	imidazolium	so4-1	sulfates	n-hexane	alkanes	208.236	86.178	331.14	FALSE		0.8084		0.910675			TRUE	TRUE	TRUE	TRUE	TRUE		0.981659	1.5409e-05	0.992327	3.72327e-05	0.981652	1.5408e-05	0.992324	3.72303e-05	0.995095	4.5866e-18	0.997964	1.10828e-17	0.995093	4.587e-18	0.997963	1.10838e-17		1	1	2	1	1	2
3	14	domanska-2006a	im-1,1	imidazolium	so4-1	sulfates	n-hexane	alkanes	208.236	86.178	327.89	FALSE		0.8329		0.923337			TRUE	TRUE	TRUE	TRUE	TRUE		0.981785	1.3127e-05	0.992381	3.17188e-05	0.981779	1.3127e-05	0.992378	3.17188e-05	0.99532	3.032e-18	0.998058	7.32637e-18	0.995318	3.0322e-18	0.998057	7.32685e-18		1	1	2	1	1	2
3	14	domanska-2006a	im-1,1	imidazolium	so4-1	sulfates	n-hexane	alkanes	208.236	86.178	324.33	FALSE		0.8632		0.93845			TRUE	TRUE	TRUE	TRUE	TRUE		0.981908	1.0966e-05	0.992432	2.64973e-05	0.981901	1.0966e-05	0.99243	2.64973e-05	0.995557	1.9079e-18	0.998157	4.61015e-18	0.995555	1.908e-18	0.998156	4.61039e-18		1	1	2	1	1	2
3	14	domanska-2006a	im-1,1	imidazolium	so4-1	sulfates	n-hexane	alkanes	208.236	86.178	321.78	FALSE		0.8742		0.943793			TRUE	TRUE	TRUE	TRUE	TRUE		0.981984	9.6123e-06	0.992465	2.32263e-05	0.981978	9.6121e-06	0.992462	2.32259e-05	0.99572	1.3603e-18	0.998224	3.28696e-18	0.995718	1.3604e-18	0.998224	3.2872e-18		1	1	2	1	1	2
3	14	domanska-2006a	im-1,1	imidazolium	so4-1	sulfates	n-hexane	alkanes	208.236	86.178	319.43	FALSE		0.8866		0.949728			TRUE	TRUE	TRUE	TRUE	TRUE		0.982046	8.4945e-06	0.992491	2.05254e-05	0.982041	8.4943e-06	0.992489	2.05249e-05	0.995866	9.9105e-19	0.998285	2.39472e-18	0.995864	9.9108e-19	0.998284	2.39479e-18		1	1	2	1	1	2
3	14	domanska-2006a	im-1,1	imidazolium	so4-1	sulfates	n-hexane	alkanes	208.236	86.178	313.36	FALSE		0.9185		0.964579			TRUE	TRUE	TRUE	TRUE	TRUE		0.982169	6.1103e-06	0.992543	1.47645e-05	0.982164	6.1102e-06	0.992541	1.47642e-05	0.99963	4.2614e-18	0.999847	1.0297e-17	0.99963	4.2614e-18	0.999847	1.0297e-17		1	1	2	1	1	2
3	14	domanska-2006a	im-1,1	imidazolium	so4-1	sulfates	n-hexane	alkanes	208.236	86.178	308.98	FALSE		0.9322		0.97078			TRUE	TRUE	FALSE	FALSE	FALSE		0.982222	4.7723e-06	0.992565	1.15315e-05	0.982218	4.7722e-06	0.992563	1.15312e-05										1	1	2	1	1	2
3	14	domanska-2006a	im-1,1	imidazolium	so4-1	sulfates	n-hexane	alkanes	208.236	86.178	301.52	FALSE		0.9582		0.982267			TRUE	TRUE	FALSE	TRUE	FALSE		0.98224	3.0729e-06	0.992573	7.42516e-06	0.982236	3.0728e-06	0.992571	7.42492e-06					0.99969	7.4749e-19	0.999872	1.8062e-18		1	1	2	1	1	2
3	14	domanska-2006a	im-1,1	imidazolium	so4-1	sulfates	n-hexane	alkanes	208.236	86.178	295.87	FALSE		0.9731		0.988689			TRUE	TRUE	TRUE	FALSE	FALSE		0.982188	2.1643e-06	0.992551	5.22968e-06	0.982185	2.1643e-06	0.992549	5.22968e-06	0.999715	3.0969e-19	0.999882	7.48319e-19						1	1	2	1	1	2
3	15	domanska-2006a	im-1,1	imidazolium	so4-1	sulfates	n-heptane	alkanes	208.236	100.205	367.52	FALSE		0.702		0.830376			TRUE	TRUE	TRUE	TRUE	TRUE		0.987996	7.6196e-05	0.994187	0.00015833	0.987739	7.6225e-05	0.994062	0.00015839	0.996414	3.9334e-16	0.998271	8.174e-16	0.996368	3.9607e-16	0.998249	8.23073e-16		1	1	2	1	1	2
3	15	domanska-2006a	im-1,1	imidazolium	so4-1	sulfates	n-heptane	alkanes	208.236	100.205	364.6	FALSE		0.7202		0.842495			TRUE	TRUE	TRUE	FALSE	FALSE		0.988154	6.8143e-05	0.994264	0.000141598	0.987905	6.817e-05	0.994143	0.000141654	0.996568	2.9228e-16	0.998345	6.07387e-16						1	1	2	1	1	2
3	15	domanska-2006a	im-1,1	imidazolium	so4-1	sulfates	n-heptane	alkanes	208.236	100.205	361.67	FALSE		0.7421		0.856727			TRUE	TRUE	TRUE	TRUE	TRUE		0.988305	6.0783e-05	0.994338	0.000126305	0.988063	6.0807e-05	0.99422	0.000126355	0.996717	2.1589e-16	0.998417	4.48641e-16	0.996676	2.1736e-16	0.998398	4.51696e-16		1	1	2	1	1	2
3	15	domanska-2006a	im-1,1	imidazolium	so4-1	sulfates	n-heptane	alkanes	208.236	100.205	358.86	FALSE		0.7623		0.869527			TRUE	TRUE	FALSE	TRUE	FALSE		0.988444	5.4356e-05	0.994406	0.000112951	0.988209	5.4377e-05	0.994291	0.000112994					0.996816	1.6176e-16	0.998465	3.36153e-16		1	1	2	1	1	2
3	15	domanska-2006a	im-1,1	imidazolium	so4-1	sulfates	n-heptane	alkanes	208.236	100.205	355.71	FALSE		0.7854		0.883795			TRUE	TRUE	TRUE	FALSE	FALSE		0.988592	4.7832e-05	0.994478	9.93945e-05	0.988364	4.785e-05	0.994367	9.9432e-05	0.997003	1.1474e-16	0.998556	2.38441e-16						1	1	2	1	1	2
3	15	domanska-2006a	im-1,1	imidazolium	so4-1	sulfates	n-heptane	alkanes	208.236	100.205	353.38	FALSE		0.8062		0.896317			TRUE	TRUE	TRUE	TRUE	TRUE		0.988696	4.3438e-05	0.994528	9.02643e-05	0.988473	4.3454e-05	0.99442	9.02975e-05	0.997109	8.9077e-17	0.998607	1.85111e-16	0.997075	8.9663e-17	0.99859	1.86329e-16		1	1	2	1	1	2
3	15	domanska-2006a	im-1,1	imidazolium	so4-1	sulfates	n-heptane	alkanes	208.236	100.205	349.57	FALSE		0.8204		0.904695			TRUE	TRUE	TRUE	TRUE	TRUE		0.988857	3.698e-05	0.994607	7.68451e-05	0.988643	3.6994e-05	0.994503	7.68742e-05	0.997276	5.8444e-17	0.998687	1.21452e-16	0.997244	5.8822e-17	0.998672	1.22238e-16		1	1	2	1	1	2
3	15	domanska-2006a	im-1,1	imidazolium	so4-1	sulfates	n-heptane	alkanes	208.236	100.205	346.12	FALSE		0.834		0.912592			TRUE	TRUE	TRUE	FALSE	FALSE		0.988993	3.1846e-05	0.994673	6.61769e-05	0.988786	3.1858e-05	0.994572	6.62018e-05	0.99742	3.9574e-17	0.998757	8.22387e-17						1	1	2	1	1	2
3	15	domanska-2006a	im-1,1	imidazolium	so4-1	sulfates	n-heptane	alkanes	208.236	100.205	337.86	FALSE		0.8753		0.935843			TRUE	TRUE	TRUE	TRUE	TRUE		0.989278	2.1934e-05	0.994812	4.558e-05	0.989087	2.1942e-05	0.994719	4.55966e-05	0.999777	1.4989e-16	0.999893	3.11486e-16	0.999775	1.5081e-16	0.999892	3.13398e-16		1	1	2	1	1	2
3	15	domanska-2006a	im-1,1	imidazolium	so4-1	sulfates	n-heptane	alkanes	208.236	100.205	331.79	FALSE		0.8982		0.948282			TRUE	TRUE	FALSE	FALSE	FALSE		0.98945	1.644e-05	0.994895	3.41634e-05	0.989271	1.6446e-05	0.994808	3.41758e-05										1	1	2	1	1	2
3	15	domanska-2006a	im-1,1	imidazolium	so4-1	sulfates	n-heptane	alkanes	208.236	100.205	322.66	FALSE		0.9293		0.964683			TRUE	TRUE	TRUE	TRUE	TRUE		0.989648	1.0398e-05	0.994992	2.16078e-05	0.989484	1.0402e-05	0.994912	2.16162e-05	0.99987	2.9643e-17	0.999937	6.16011e-17	0.999869	2.9813e-17	0.999937	6.19544e-17		1	1	2	1	1	2
3	15	domanska-2006a	im-1,1	imidazolium	so4-1	sulfates	n-heptane	alkanes	208.236	100.205	313.07	FALSE		0.9666		0.983644			TRUE	TRUE	TRUE	TRUE	TRUE		0.989771	6.2103e-06	0.995052	1.29055e-05	0.989622	6.2126e-06	0.994979	1.29103e-05	0.999889	8.0317e-18	0.999947	1.66907e-17	0.999888	8.0755e-18	0.999946	1.67817e-17		1	1	2	1	1	2
3	15	domanska-2006a	im-1,1	imidazolium	so4-1	sulfates	n-heptane	alkanes	208.236	100.205	371	FALSE		0.6812		0.81619			TRUE	TRUE	FALSE	FALSE	FALSE		0.987799	8.6799e-05	0.994091	0.00018036	0.987534	8.6833e-05	0.993962	0.000180431										1	1	2	1	1	2
3	16	domanska-2006a	im-1,1	imidazolium	so4-1	sulfates	n-octane	alkanes	208.236	114.232	396.2	FALSE		0.5462		0.686922			TRUE	TRUE	TRUE	TRUE	TRUE		0.991775	0.00021221	0.995471	0.000386775	0.991563	0.00021234	0.995354	0.000387012	0.997429	7.6363e-15	0.998588	1.39204e-14	0.997393	7.6841e-15	0.998568	1.40075e-14		1	1	2	1	1	2
3	16	domanska-2006a	im-1,1	imidazolium	so4-1	sulfates	n-octane	alkanes	208.236	114.232	388.79	FALSE		0.5942		0.727464			TRUE	TRUE	TRUE	FALSE	FALSE		0.992137	0.00016716	0.995671	0.000304678	0.991939	0.00016726	0.995562	0.00030486	0.997711	3.9969e-15	0.998743	7.28604e-15						1	1	2	1	1	2
3	16	domanska-2006a	im-1,1	imidazolium	so4-1	sulfates	n-octane	alkanes	208.236	114.232	384.29	FALSE		0.6273		0.754191			TRUE	TRUE	TRUE	TRUE	TRUE		0.992341	0.0001438	0.995784	0.000262105	0.992153	0.00014389	0.99568	0.000262269	0.997869	2.6638e-15	0.99883	4.8559e-15	0.997841	2.6801e-15	0.998814	4.88561e-15		1	1	2	1	1	2
3	16	domanska-2006a	im-1,1	imidazolium	so4-1	sulfates	n-octane	alkanes	208.236	114.232	376.82	FALSE		0.6829		0.796988			TRUE	TRUE	TRUE	TRUE	TRUE		0.992656	0.00011091	0.995958	0.000202162	0.992482	0.00011098	0.995862	0.000202289	0.998111	1.3284e-15	0.998963	2.42157e-15	0.998087	1.3364e-15	0.998949	2.43615e-15		1	1	2	1	1	2
3	16	domanska-2006a	im-1,1	imidazolium	so4-1	sulfates	n-octane	alkanes	208.236	114.232	374.04	FALSE		0.7016		0.810823			TRUE	TRUE	TRUE	TRUE	TRUE		0.992766	0.00010036	0.996018	0.000182933	0.992596	0.00010042	0.995925	0.000183043	0.998195	1.0179e-15	0.999009	1.85555e-15	0.998172	1.024e-15	0.998996	1.86667e-15		1	1	2	1	1	2
3	16	domanska-2006a	im-1,1	imidazolium	so4-1	sulfates	n-octane	alkanes	208.236	114.232	370.81	FALSE		0.7239		0.826974			TRUE	TRUE	TRUE	TRUE	TRUE		0.992888	8.9155e-05	0.996086	0.000162511	0.992724	8.9209e-05	0.995995	0.000162609	0.998289	7.4315e-16	0.999061	1.3547e-15	0.998267	7.4759e-16	0.999049	1.3628e-15		1	1	2	1	1	2
3	16	domanska-2006a	im-1,1	imidazolium	so4-1	sulfates	n-octane	alkanes	208.236	114.232	366.39	FALSE		0.7612		0.853173			TRUE	TRUE	TRUE	TRUE	TRUE		0.993046	7.55e-05	0.996173	0.000137622	0.992889	7.5546e-05	0.996087	0.000137706	0.99841	4.7873e-16	0.999127	8.72687e-16	0.998391	4.8157e-16	0.999116	8.77864e-16		1	1	2	1	1	2
3	16	domanska-2006a	im-1,1	imidazolium	so4-1	sulfates	n-octane	alkanes	208.236	114.232	360.03	FALSE		0.7988		0.878601			TRUE	TRUE	TRUE	TRUE	TRUE		0.993256	5.8916e-05	0.996289	0.000107394	0.993108	5.8951e-05	0.996208	0.000107458	0.998572	2.4932e-16	0.999216	4.54491e-16	0.998555	2.5078e-16	0.999207	4.57152e-16		1	1	2	1	1	2
3	16	domanska-2006a	im-1,1	imidazolium	so4-1	sulfates	n-octane	alkanes	208.236	114.232	357.85	FALSE		0.8086		0.885074			TRUE	TRUE	TRUE	TRUE	TRUE		0.993322	5.3979e-05	0.996326	9.83951e-05	0.993179	5.4012e-05	0.996246	9.84553e-05	0.998624	1.9827e-16	0.999245	3.61431e-16	0.998608	1.9942e-16	0.999236	3.63527e-16		1	1	2	1	1	2
3	16	domanska-2006a	im-1,1	imidazolium	so4-1	sulfates	n-octane	alkanes	208.236	114.232	354.46	FALSE		0.8319		0.900213			TRUE	TRUE	TRUE	FALSE	FALSE		0.993422	4.6988e-05	0.996381	8.56521e-05	0.993283	4.7017e-05	0.996304	8.5705e-05	0.998702	1.3803e-16	0.999288	2.51618e-16						1	1	2	1	1	2
3	16	domanska-2006a	im-1,1	imidazolium	so4-1	sulfates	n-octane	alkanes	208.236	114.232	347.21	FALSE		0.8611		0.918706			TRUE	TRUE	TRUE	TRUE	TRUE		0.993613	3.4542e-05	0.996486	6.29656e-05	0.993484	3.4563e-05	0.996415	6.30039e-05	0.998857	6.2086e-17	0.999372	1.13178e-16	0.998844	6.2439e-17	0.999365	1.13821e-16		1	1	2	1	1	2
3	16	domanska-2006a	im-1,1	imidazolium	so4-1	sulfates	n-octane	alkanes	208.236	114.232	341.9	FALSE		0.8852		0.933582			TRUE	TRUE	TRUE	TRUE	TRUE		0.993735	2.7295e-05	0.996554	4.97555e-05	0.993613	2.7311e-05	0.996486	4.97847e-05	0.998959	3.3822e-17	0.999429	6.16549e-17	0.998948	3.4012e-17	0.999423	6.20012e-17		1	1	2	1	1	2
3	16	domanska-2006a	im-1,1	imidazolium	so4-1	sulfates	n-octane	alkanes	208.236	114.232	337.11	FALSE		0.9033		0.944532			TRUE	TRUE	TRUE	FALSE	FALSE		0.993833	2.1902e-05	0.996607	3.99249e-05	0.993716	2.1915e-05	0.996543	3.99486e-05	0.999929	2.5643e-16	0.999961	4.67452e-16						1	1	2	1	1	2
3	16	domanska-2006a	im-1,1	imidazolium	so4-1	sulfates	n-octane	alkanes	208.236	114.232	330.28	FALSE		0.926		0.958003			TRUE	TRUE	TRUE	TRUE	TRUE		0.993949	1.5791e-05	0.996672	2.87854e-05	0.99384	1.58e-05	0.996611	2.88018e-05	0.999937	1.1128e-16	0.999966	2.02855e-16	0.999937	1.1189e-16	0.999965	2.03967e-16		1	1	2	1	1	2
3	16	domanska-2006a	im-1,1	imidazolium	so4-1	sulfates	n-octane	alkanes	208.236	114.232	327.8	FALSE		0.9351		0.963323			TRUE	TRUE	TRUE	TRUE	TRUE		0.993985	1.3966e-05	0.996691	2.54586e-05	0.993878	1.3974e-05	0.996633	2.54732e-05	0.99994	8.1453e-17	0.999967	1.48482e-16	0.99994	8.1894e-17	0.999967	1.49286e-16		1	1	2	1	1	2
3	16	domanska-2006a	im-1,1	imidazolium	so4-1	sulfates	n-octane	alkanes	208.236	114.232	324.2	FALSE		0.9472		0.970328			TRUE	TRUE	FALSE	TRUE	FALSE		0.99403	1.1639e-05	0.996716	2.12168e-05	0.993927	1.1646e-05	0.99666	2.12295e-05					0.999943	5.1608e-17	0.999969	9.40773e-17		1	1	2	1	1	2
3	16	domanska-2006a	im-1,1	imidazolium	so4-1	sulfates	n-octane	alkanes	208.236	114.232	319.32	FALSE		0.9595		0.977369			TRUE	TRUE	FALSE	FALSE	FALSE		0.99408	9.0199e-06	0.996744	1.64425e-05	0.993981	9.0253e-06	0.996689	1.64523e-05										1	1	2	1	1	2
3	17	domanska-2006a	im-1,1	imidazolium	so4-1	sulfates	n-decane	alkanes	208.236	142.286	442.81	FALSE		0.5381		0.630306			TRUE	TRUE	TRUE	TRUE	TRUE		0.995674	0.00082004	0.99704	0.00119968	0.995636	0.00081992	0.997014	0.0011995	0.998662	4.1217e-13	0.999086	6.03212e-13	0.998659	4.1242e-13	0.999084	6.03578e-13		1	1	2	1	1	2
3	17	domanska-2006a	im-1,1	imidazolium	so4-1	sulfates	n-decane	alkanes	208.236	142.286	430.6	FALSE		0.5922		0.680028			TRUE	TRUE	TRUE	TRUE	TRUE		0.996091	0.00060674	0.997326	0.000887716	0.99606	0.00060666	0.997305	0.000887599	0.998909	1.7714e-13	0.999254	2.59245e-13	0.998907	1.7723e-13	0.999253	2.59377e-13		1	1	2	1	1	2
3	17	domanska-2006a	im-1,1	imidazolium	so4-1	sulfates	n-decane	alkanes	208.236	142.286	419.84	FALSE		0.634		0.717126			TRUE	TRUE	TRUE	TRUE	TRUE		0.996417	0.00045699	0.997549	0.000668665	0.996392	0.00045693	0.997532	0.000668577	0.999094	8.0675e-14	0.999381	1.18068e-13	0.999092	8.071e-14	0.999379	1.18119e-13		1	1	2	1	1	2
3	17	domanska-2006a	im-1,1	imidazolium	so4-1	sulfates	n-decane	alkanes	208.236	142.286	411.65	FALSE		0.6697		0.747941			TRUE	TRUE	TRUE	TRUE	TRUE		0.996641	0.00036379	0.997703	0.000532318	0.996619	0.00036375	0.997688	0.00053226	0.999216	4.3086e-14	0.999464	6.30565e-14	0.999215	4.3102e-14	0.999463	6.30799e-14		1	1	2	1	1	2
3	17	domanska-2006a	im-1,1	imidazolium	so4-1	sulfates	n-decane	alkanes	208.236	142.286	406.21	FALSE		0.6889		0.764194			TRUE	TRUE	TRUE	TRUE	TRUE		0.996779	0.00031068	0.997797	0.000454616	0.996759	0.00031065	0.997784	0.000454572	0.999289	2.7997e-14	0.999514	4.09737e-14	0.999288	2.8006e-14	0.999514	4.09869e-14		1	1	2	1	1	2
3	17	domanska-2006a	im-1,1	imidazolium	so4-1	sulfates	n-decane	alkanes	208.236	142.286	399.8	FALSE		0.7194		0.789567			TRUE	TRUE	TRUE	TRUE	TRUE		0.996931	0.00025619	0.997901	0.00037489	0.996914	0.00025617	0.997889	0.000374861	0.999368	1.6585e-14	0.999568	2.42722e-14	0.999367	1.659e-14	0.999568	2.42795e-14		1	1	2	1	1	2
3	17	domanska-2006a	im-1,1	imidazolium	so4-1	sulfates	n-decane	alkanes	208.236	142.286	390.63	FALSE		0.7621		0.824199			TRUE	TRUE	TRUE	TRUE	TRUE		0.997129	0.00019178	0.998037	0.000280646	0.997114	0.00019176	0.998026	0.000280616	0.999468	7.6025e-15	0.999636	1.11263e-14	0.999467	7.6042e-15	0.999636	1.11288e-14		1	1	2	1	1	2
3	17	domanska-2006a	im-1,1	imidazolium	so4-1	sulfates	n-decane	alkanes	208.236	142.286	381.71	FALSE		0.8057		0.858531			TRUE	TRUE	TRUE	TRUE	TRUE		0.997301	0.00014231	0.998154	0.000208257	0.997288	0.0001423	0.998145	0.000208243	0.999552	3.4296e-15	0.999694	5.01923e-15	0.999552	3.4302e-15	0.999694	5.02011e-15		1	1	2	1	1	2
3	17	domanska-2006a	im-1,1	imidazolium	so4-1	sulfates	n-decane	alkanes	208.236	142.286	377.83	FALSE		0.8257		0.873944			TRUE	TRUE	TRUE	FALSE	FALSE		0.997369	0.0001243	0.998201	0.000181903	0.997358	0.0001243	0.998193	0.000181903	0.999585	2.3966e-15	0.999716	3.50743e-15						1	1	2	1	1	2
3	17	domanska-2006a	im-1,1	imidazolium	so4-1	sulfates	n-decane	alkanes	208.236	142.286	363.72	FALSE		0.8763		0.91203			TRUE	TRUE	TRUE	TRUE	TRUE		0.997588	7.3745e-05	0.998351	0.000107922	0.997579	7.3741e-05	0.998344	0.000107916	0.999687	6.0887e-16	0.999786	8.91083e-16	0.999687	6.089e-16	0.999786	8.91127e-16		1	1	2	1	1	2
3	17	domanska-2006a	im-1,1	imidazolium	so4-1	sulfates	n-decane	alkanes	208.236	142.286	354	FALSE		0.9176		0.942188			TRUE	TRUE	TRUE	TRUE	TRUE		0.997711	4.9947e-05	0.998435	7.30959e-05	0.997704	4.9945e-05	0.99843	7.3093e-05	0.999745	2.2182e-16	0.999825	3.24634e-16	0.999744	2.2183e-16	0.999825	3.24649e-16		1	1	2	1	1	2
3	17	domanska-2006a	im-1,1	imidazolium	so4-1	sulfates	n-decane	alkanes	208.236	142.286	350.23	FALSE		0.9344		0.954225			TRUE	TRUE	TRUE	TRUE	TRUE		0.997753	4.2636e-05	0.998464	6.23967e-05	0.997747	4.2634e-05	0.998459	6.23938e-05	0.999764	1.4762e-16	0.999839	2.16042e-16	0.999764	1.4762e-16	0.999839	2.16042e-16		1	1	2	1	1	2
3	17	domanska-2006a	im-1,1	imidazolium	so4-1	sulfates	n-decane	alkanes	208.236	142.286	328.5	FALSE		0.9585		0.971266			TRUE	TRUE	TRUE	TRUE	TRUE		0.997932	1.5705e-05	0.998586	2.29841e-05	0.997928	1.5704e-05	0.998583	2.29827e-05	0.999993	2.3378e-16	0.999995	3.42138e-16	0.999993	2.3375e-16	0.999995	3.42094e-16		1	1	2	1	1	2
3	17	domanska-2006a	im-1,1	imidazolium	so4-1	sulfates	n-decane	alkanes	208.236	142.286	322.66	FALSE		0.9681		0.977981			TRUE	TRUE	TRUE	TRUE	TRUE		0.997961	1.168e-05	0.998606	1.70936e-05	0.997957	1.168e-05	0.998603	1.70936e-05	0.999994	1.1134e-16	0.999996	1.62946e-16	0.999994	1.1132e-16	0.999996	1.62917e-16		1	1	2	1	1	2
3	17	domanska-2006a	im-1,1	imidazolium	so4-1	sulfates	n-decane	alkanes	208.236	142.286	318.18	FALSE		0.9809		0.98687			TRUE	TRUE	TRUE	TRUE	TRUE		0.997977	9.2263e-06	0.998617	1.35027e-05	0.997973	9.226e-06	0.998614	1.35022e-05	0.999994	6.1833e-17	0.999996	9.04928e-17	0.999994	6.1822e-17	0.999996	9.04767e-17		1	1	2	1	1	2
3	17	domanska-2006a	im-1,1	imidazolium	so4-1	sulfates	n-decane	alkanes	208.236	142.286	308.3	FALSE		1		1			TRUE	TRUE	TRUE	TRUE	TRUE		0.997994	5.3299e-06	0.998628	7.80031e-06	0.997991	5.3298e-06	0.998626	7.80016e-06	0.999995	1.5879e-17	0.999997	2.3239e-17	0.999995	1.5875e-17	0.999997	2.32331e-17		1	1	2	1	1	2
3	18	domanska-2006a	im-1,1	imidazolium	so4-1	sulfates	cyclohexane	cyclic alkanes	208.236	84.162	348.12	FALSE		0.7404		0.87588			TRUE	TRUE	TRUE	TRUE	TRUE		0.959396	3.3493e-05	0.983182	8.28652e-05	0.959396	3.3493e-05	0.983182	8.28652e-05	0.985182	8.0918e-17	0.993958	2.0021e-16	0.985182	8.0918e-17	0.993958	2.0021e-16		1	1	1	1	1	1
3	18	domanska-2006a	im-1,1	imidazolium	so4-1	sulfates	cyclohexane	cyclic alkanes	208.236	84.162	343.98	FALSE		0.7857		0.900709			TRUE	TRUE	TRUE	TRUE	TRUE		0.95991	2.7888e-05	0.9834	6.89984e-05	0.95991	2.7888e-05	0.9834	6.89984e-05	0.985915	5.0695e-17	0.994259	1.25431e-16	0.985915	5.0695e-17	0.994259	1.25431e-16		1	1	1	1	1	1
3	18	domanska-2006a	im-1,1	imidazolium	so4-1	sulfates	cyclohexane	cyclic alkanes	208.236	84.162	337.39	FALSE		0.8503		0.933571			TRUE	TRUE	TRUE	TRUE	TRUE		0.960651	2.0603e-05	0.983715	5.0975e-05	0.960651	2.0603e-05	0.983715	5.0975e-05	0.987019	2.3499e-17	0.994713	5.81419e-17	0.987019	2.3499e-17	0.994713	5.81419e-17		1	1	1	1	1	1
3	18	domanska-2006a	im-1,1	imidazolium	so4-1	sulfates	cyclohexane	cyclic alkanes	208.236	84.162	333.17	FALSE		0.8787		0.947155			TRUE	TRUE	TRUE	TRUE	TRUE		0.961074	1.6843e-05	0.983894	4.16724e-05	0.961074	1.6843e-05	0.983894	4.16724e-05	0.987687	1.4126e-17	0.994987	3.49509e-17	0.987687	1.4126e-17	0.994987	3.49509e-17		1	1	1	1	1	1
3	18	domanska-2006a	im-1,1	imidazolium	so4-1	sulfates	cyclohexane	cyclic alkanes	208.236	84.162	328.6	FALSE		0.9026		0.958209			TRUE	TRUE	TRUE	TRUE	TRUE		0.961486	1.3446e-05	0.984069	3.32678e-05	0.961486	1.3446e-05	0.984069	3.32678e-05	0.988377	8.0174e-18	0.99527	1.98369e-17	0.988377	8.0174e-18	0.99527	1.98369e-17		1	1	1	1	1	1
3	18	domanska-2006a	im-1,1	imidazolium	so4-1	sulfates	cyclohexane	cyclic alkanes	208.236	84.162	322.47	FALSE		0.932		0.971356			TRUE	TRUE	TRUE	TRUE	TRUE		0.961962	9.8212e-06	0.98427	2.42995e-05	0.961962	9.8212e-06	0.98427	2.42995e-05	0.989251	3.6535e-18	0.995627	9.03959e-18	0.989251	3.6535e-18	0.995627	9.03959e-18		1	1	1	1	1	1
3	18	domanska-2006a	im-1,1	imidazolium	so4-1	sulfates	cyclohexane	cyclic alkanes	208.236	84.162	316.9	FALSE		0.9531		0.9805			TRUE	TRUE	TRUE	TRUE	TRUE		0.962314	7.29e-06	0.984419	1.80369e-05	0.962314	7.29e-06	0.984419	1.80369e-05	0.989995	1.7407e-18	0.995932	4.30689e-18	0.989995	1.7407e-18	0.995932	4.30689e-18		1	1	1	1	1	1
3	19	domanska-2006a	im-1,1	imidazolium	so4-1	sulfates	cycloheptane	cyclic alkanes	208.236	98.189	362.5	FALSE		0.6145		0.771719			TRUE	TRUE	TRUE	TRUE	TRUE		0.973367	6.3964e-05	0.987263	0.000135643	0.973367	6.3964e-05	0.987263	0.000135643	0.990513	7.3025e-16	0.995504	1.54869e-15	0.990513	7.3025e-16	0.995504	1.54869e-15		1	1	1	1	1	1
3	19	domanska-2006a	im-1,1	imidazolium	so4-1	sulfates	cycloheptane	cyclic alkanes	208.236	98.189	360.89	FALSE		0.6851		0.821873			TRUE	TRUE	TRUE	TRUE	TRUE		0.973543	6.0007e-05	0.987348	0.000127252	0.973543	6.0007e-05	0.987348	0.000127252	0.990711	6.2038e-16	0.995598	1.31568e-15	0.990711	6.2038e-16	0.995598	1.31568e-15		1	1	1	1	1	1
3	19	domanska-2006a	im-1,1	imidazolium	so4-1	sulfates	cycloheptane	cyclic alkanes	208.236	98.189	356.03	FALSE		0.7518		0.865299			TRUE	TRUE	TRUE	TRUE	TRUE		0.974048	4.9272e-05	0.987593	0.000104489	0.974048	4.9272e-05	0.987593	0.000104489	0.991287	3.7572e-16	0.995873	7.96815e-16	0.991287	3.7572e-16	0.995873	7.96815e-16		1	1	1	1	1	1
3	19	domanska-2006a	im-1,1	imidazolium	so4-1	sulfates	cycloheptane	cyclic alkanes	208.236	98.189	353.37	FALSE		0.7914		0.889453			TRUE	TRUE	TRUE	TRUE	TRUE		0.97431	4.4109e-05	0.98772	9.35403e-05	0.97431	4.4109e-05	0.98772	9.35403e-05	0.99159	2.8381e-16	0.996017	6.01895e-16	0.99159	2.8381e-16	0.996017	6.01895e-16		1	1	1	1	1	1
3	19	domanska-2006a	im-1,1	imidazolium	so4-1	sulfates	cycloheptane	cyclic alkanes	208.236	98.189	349.98	FALSE		0.8223		0.907525			TRUE	TRUE	TRUE	TRUE	TRUE		0.974628	3.8191e-05	0.987874	8.09907e-05	0.974628	3.8191e-05	0.987874	8.09907e-05	0.991963	1.9723e-16	0.996194	4.18279e-16	0.991963	1.9723e-16	0.996194	4.18279e-16		1	1	1	1	1	1
3	19	domanska-2006a	im-1,1	imidazolium	so4-1	sulfates	cycloheptane	cyclic alkanes	208.236	98.189	343.3	FALSE		0.8613		0.929426			TRUE	TRUE	TRUE	TRUE	TRUE		0.975202	2.8462e-05	0.988152	6.03593e-05	0.975202	2.8462e-05	0.988152	6.03593e-05	0.992657	9.4196e-17	0.996524	1.99768e-16	0.992657	9.4196e-17	0.996524	1.99768e-16		1	1	1	1	1	1
3	19	domanska-2006a	im-1,1	imidazolium	so4-1	sulfates	cycloheptane	cyclic alkanes	208.236	98.189	337.21	FALSE		0.882		0.940659			TRUE	TRUE	TRUE	TRUE	TRUE		0.975666	2.1502e-05	0.988376	4.55996e-05	0.975666	2.1502e-05	0.988376	4.55996e-05	0.993246	4.6767e-17	0.996804	9.91819e-17	0.993246	4.6767e-17	0.996804	9.91819e-17		1	1	1	1	1	1
3	19	domanska-2006a	im-1,1	imidazolium	so4-1	sulfates	cycloheptane	cyclic alkanes	208.236	98.189	313.98	FALSE		0.9571		0.979302			TRUE	TRUE	TRUE	TRUE	TRUE		0.976874	6.5361e-06	0.98896	1.38614e-05	0.976874	6.5361e-06	0.98896	1.38614e-05	0.995137	2.4973e-18	0.997701	5.29619e-18	0.995137	2.4973e-18	0.997701	5.29619e-18		1	1	1	1	1	1
3	20	domanska-2006a	im-1,1	imidazolium	so4-1	sulfates	benzene	aromatics	208.236	78.114	354.99	FALSE		0.5186		0.741722			TRUE	TRUE	TRUE	TRUE	TRUE		0.675005	0.00424589	0.84702	0.0112392	0.675005	0.00424589	0.84702	0.0112392	0.751483	3.4424e-08	0.889637	9.17674e-08	0.751483	3.4424e-08	0.889637	9.17674e-08		1	1	1	1	1	1
3	20	domanska-2006a	im-1,1	imidazolium	so4-1	sulfates	benzene	aromatics	208.236	78.114	349.4	FALSE		0.528		0.748875			TRUE	TRUE	TRUE	TRUE	TRUE		0.678652	0.00375225	0.849167	0.0099406	0.678652	0.00375225	0.849167	0.0099406	0.761371	2.5566e-08	0.894798	6.81537e-08	0.761371	2.5566e-08	0.894798	6.81537e-08		1	1	1	1	1	1
3	20	domanska-2006a	im-1,1	imidazolium	so4-1	sulfates	benzene	aromatics	208.236	78.114	348.02	FALSE		0.5365		0.755241			TRUE	TRUE	TRUE	TRUE	TRUE		0.679509	0.00363744	0.84967	0.00963827	0.679509	0.00363744	0.84967	0.00963827	0.763739	2.373e-08	0.896022	6.32593e-08	0.763739	2.373e-08	0.896022	6.32593e-08		1	1	1	1	1	1
3	20	domanska-2006a	im-1,1	imidazolium	so4-1	sulfates	benzene	aromatics	208.236	78.114	344.4	FALSE		0.54		0.757835			TRUE	TRUE	TRUE	TRUE	TRUE		0.681675	0.00334904	0.850939	0.00887833	0.681675	0.00334904	0.850939	0.00887833	0.769816	1.9475e-08	0.899146	5.19164e-08	0.769816	1.9475e-08	0.899146	5.19164e-08		1	1	1	1	1	1
3	20	domanska-2006a	im-1,1	imidazolium	so4-1	sulfates	benzene	aromatics	208.236	78.114	339.2	FALSE		0.5637		0.774988			TRUE	TRUE	TRUE	TRUE	TRUE		0.684578	0.00296585	0.852632	0.00786748	0.684578	0.00296585	0.852632	0.00786748	0.778217	1.4579e-08	0.903419	3.88646e-08	0.778217	1.4579e-08	0.903419	3.88646e-08		1	1	1	1	1	1
3	20	domanska-2006a	im-1,1	imidazolium	so4-1	sulfates	benzene	aromatics	208.236	78.114	333.76	FALSE		0.5834		0.788724			TRUE	TRUE	TRUE	TRUE	TRUE		0.687341	0.00260198	0.854236	0.00690641	0.687341	0.00260198	0.854236	0.00690641	0.786608	1.0687e-08	0.907636	2.84894e-08	0.786608	1.0687e-08	0.907636	2.84894e-08		1	1	1	1	1	1
3	20	domanska-2006a	im-1,1	imidazolium	so4-1	sulfates	benzene	aromatics	208.236	78.114	328.94	FALSE		0.5937		0.795725			TRUE	TRUE	TRUE	TRUE	TRUE		0.689552	0.00230928	0.855515	0.00613248	0.689552	0.00230928	0.855515	0.00613248	0.793719	8.0599e-09	0.911169	2.14861e-08	0.793719	8.0599e-09	0.911169	2.14861e-08		1	1	1	1	1	1
3	20	domanska-2006a	im-1,1	imidazolium	so4-1	sulfates	benzene	aromatics	208.236	78.114	324.92	FALSE		0.5956		0.797003			TRUE	TRUE	TRUE	TRUE	TRUE		0.691219	0.00208521	0.856476	0.0055395	0.691219	0.00208521	0.856476	0.0055395	0.799427	6.3358e-09	0.913979	1.689e-08	0.799427	6.3358e-09	0.913979	1.689e-08		1	1	1	1	1	1
3	20	domanska-2006a	im-1,1	imidazolium	so4-1	sulfates	benzene	aromatics	208.236	78.114	321.39	FALSE		0.6054		0.803532			TRUE	TRUE	TRUE	TRUE	TRUE		0.692548	0.0019027	0.857241	0.00505618	0.692548	0.0019027	0.857241	0.00505618	0.804276	5.107e-09	0.916349	1.36142e-08	0.804276	5.107e-09	0.916349	1.36142e-08		1	1	1	1	1	1
3	20	domanska-2006a	im-1,1	imidazolium	so4-1	sulfates	benzene	aromatics	208.236	78.114	319.76	FALSE		0.6179		0.811708			TRUE	TRUE	TRUE	TRUE	TRUE		0.693119	0.00182275	0.857569	0.00484437	0.693119	0.00182275	0.857569	0.00484437	0.806465	4.6167e-09	0.917413	1.23072e-08	0.806465	4.6167e-09	0.917413	1.23072e-08		1	1	1	1	1	1
3	20	domanska-2006a	im-1,1	imidazolium	so4-1	sulfates	benzene	aromatics	208.236	78.114	316.9	FALSE		0.6253		0.816469			TRUE	TRUE	TRUE	TRUE	TRUE		0.694051	0.00168879	0.858104	0.00448934	0.694051	0.00168879	0.858104	0.00448934	0.81023	3.8588e-09	0.919236	1.02868e-08	0.81023	3.8588e-09	0.919236	1.02868e-08		1	1	1	1	1	1
3	20	domanska-2006a	im-1,1	imidazolium	so4-1	sulfates	benzene	aromatics	208.236	78.114	318.48	FALSE		0.6284		0.818447			TRUE	TRUE	TRUE	TRUE	TRUE		0.693547	0.00176181	0.857815	0.00468288	0.693547	0.00176181	0.857815	0.00468288	0.808161	4.2622e-09	0.918235	1.13622e-08	0.808161	4.2622e-09	0.918235	1.13622e-08		1	1	1	1	1	1
3	20	domanska-2006a	im-1,1	imidazolium	so4-1	sulfates	benzene	aromatics	208.236	78.114	312.6	FALSE		0.6422		0.827131			TRUE	TRUE	TRUE	TRUE	TRUE		0.69529	0.00150197	0.858813	0.00399395	0.69529	0.00150197	0.858813	0.00399395	0.815717	2.9309e-09	0.921875	7.81318e-09	0.815717	2.9309e-09	0.921875	7.81318e-09		1	1	1	1	1	1
3	20	domanska-2006a	im-1,1	imidazolium	so4-1	sulfates	benzene	aromatics	208.236	78.114	313.61	FALSE		0.6481		0.830785			TRUE	TRUE	TRUE	TRUE	TRUE		0.695017	0.00154432	0.858657	0.00410628	0.695017	0.00154432	0.858657	0.00410628	0.814447	3.1284e-09	0.921266	8.33968e-09	0.814447	3.1284e-09	0.921266	8.33968e-09		1	1	1	1	1	1
3	20	domanska-2006a	im-1,1	imidazolium	so4-1	sulfates	benzene	aromatics	208.236	78.114	309.79	FALSE		0.6687		0.843277			TRUE	TRUE	TRUE	TRUE	TRUE		0.695991	0.00138891	0.859215	0.003694	0.695991	0.00138891	0.859215	0.003694	0.819193	2.4397e-09	0.923536	6.50374e-09	0.819193	2.4397e-09	0.923536	6.50374e-09		1	1	1	1	1	1
3	20	domanska-2006a	im-1,1	imidazolium	so4-1	sulfates	benzene	aromatics	208.236	78.114	308.57	FALSE		0.6707		0.844468			TRUE	TRUE	TRUE	TRUE	TRUE		0.696268	0.00134195	0.859373	0.00356939	0.696268	0.00134195	0.859373	0.00356939	0.820675	2.2509e-09	0.924242	6.00044e-09	0.820675	2.2509e-09	0.924242	6.00044e-09		1	1	1	1	1	1
3	20	domanska-2006a	im-1,1	imidazolium	so4-1	sulfates	benzene	aromatics	208.236	78.114	305.98	FALSE		0.6875		0.854328			TRUE	TRUE	TRUE	TRUE	TRUE		0.6968	0.00124639	0.859677	0.00331574	0.6968	0.00124639	0.859677	0.00331574	0.82377	1.8933e-09	0.925711	5.04715e-09	0.82377	1.8933e-09	0.925711	5.04715e-09		1	1	1	1	1	1
3	20	domanska-2006a	im-1,1	imidazolium	so4-1	sulfates	benzene	aromatics	208.236	78.114	303.99	FALSE		0.7043		0.863935			TRUE	TRUE	TRUE	TRUE	TRUE		0.697158	0.00117667	0.859881	0.00313063	0.697158	0.00117667	0.859881	0.00313063	0.8261	1.6547e-09	0.926813	4.41109e-09	0.8261	1.6547e-09	0.926813	4.41109e-09		1	1	1	1	1	1
3	20	domanska-2006a	im-1,1	imidazolium	so4-1	sulfates	benzene	aromatics	208.236	78.114	302.51	FALSE		0.7074		0.86568			TRUE	TRUE	TRUE	TRUE	TRUE		0.697394	0.00112685	0.860016	0.00299832	0.697394	0.00112685	0.860016	0.00299832	0.827806	1.4953e-09	0.927618	3.98616e-09	0.827806	1.4953e-09	0.927618	3.98616e-09		1	1	1	1	1	1
3	20	domanska-2006a	im-1,1	imidazolium	so4-1	sulfates	benzene	aromatics	208.236	78.114	301.53	FALSE		0.7192		0.87225			TRUE	TRUE	TRUE	TRUE	TRUE		0.697535	0.00109477	0.860096	0.00291312	0.697535	0.00109477	0.860096	0.00291312	0.828923	1.3976e-09	0.928144	3.72572e-09	0.828923	1.3976e-09	0.928144	3.72572e-09		1	1	1	1	1	1
3	20	domanska-2006a	im-1,1	imidazolium	so4-1	sulfates	benzene	aromatics	208.236	78.114	300.29	FALSE		0.7354		0.88108			TRUE	TRUE	TRUE	TRUE	TRUE		0.697699	0.00105523	0.86019	0.00280809	0.697699	0.00105523	0.86019	0.00280809	0.830323	1.2824e-09	0.928801	3.41862e-09	0.830323	1.2824e-09	0.928801	3.41862e-09		1	1	1	1	1	1
3	20	domanska-2006a	im-1,1	imidazolium	so4-1	sulfates	benzene	aromatics	208.236	78.114	301.92	FALSE		0.7437		0.885522			TRUE	TRUE	TRUE	TRUE	TRUE		0.697481	0.00110745	0.860065	0.0029468	0.697481	0.00110745	0.860065	0.0029468	0.82848	1.4358e-09	0.927935	3.82755e-09	0.82848	1.4358e-09	0.927935	3.82755e-09		1	1	1	1	1	1
3	21	domanska-2006a	im-1,1	imidazolium	so4-1	sulfates	toluene	aromatics	208.236	92.141	383.03	FALSE		0.6319		0.795065			TRUE	TRUE	TRUE	TRUE	TRUE		0.794957	0.0043748	0.897562	0.00983272	0.794957	0.0043748	0.897562	0.00983272	0.868945	1.1273e-08	0.937439	2.54767e-08	0.868945	1.1273e-08	0.937439	2.54767e-08		1	1	1	1	1	1
3	21	domanska-2006a	im-1,1	imidazolium	so4-1	sulfates	toluene	aromatics	208.236	92.141	371.6	FALSE		0.6423		0.802297			TRUE	TRUE	TRUE	TRUE	TRUE		0.801182	0.00344238	0.901059	0.00774608	0.801182	0.00344238	0.901059	0.00774608	0.881671	6.254e-09	0.943943	1.41339e-08	0.881671	6.254e-09	0.943943	1.41339e-08		1	1	1	1	1	1
3	21	domanska-2006a	im-1,1	imidazolium	so4-1	sulfates	toluene	aromatics	208.236	92.141	350.59	FALSE		0.668		0.819728			TRUE	TRUE	TRUE	TRUE	TRUE		0.810458	0.00212815	0.906221	0.0047967	0.810458	0.00212815	0.906221	0.0047967	0.901769	1.9324e-09	0.954016	4.36717e-09	0.901769	1.9324e-09	0.954016	4.36717e-09		1	1	1	1	1	1
3	21	domanska-2006a	im-1,1	imidazolium	so4-1	sulfates	toluene	aromatics	208.236	92.141	339.52	FALSE		0.6926		0.835848			TRUE	TRUE	TRUE	TRUE	TRUE		0.814143	0.00161284	0.908255	0.00363758	0.814143	0.00161284	0.908255	0.00363758	0.910877	9.8521e-10	0.958502	2.22655e-09	0.910877	9.8521e-10	0.958502	2.22655e-09		1	1	1	1	1	1
3	21	domanska-2006a	im-1,1	imidazolium	so4-1	sulfates	toluene	aromatics	208.236	92.141	331.37	FALSE		0.7222		0.854551			TRUE	TRUE	TRUE	TRUE	TRUE		0.816287	0.0012996	0.909434	0.00293226	0.816287	0.0012996	0.909434	0.00293226	0.917008	5.8366e-10	0.961496	1.31905e-09	0.917008	5.8366e-10	0.961496	1.31905e-09		1	1	1	1	1	1
3	21	domanska-2006a	im-1,1	imidazolium	so4-1	sulfates	toluene	aromatics	208.236	92.141	323.28	FALSE		0.7405		0.865753			TRUE	TRUE	TRUE	TRUE	TRUE		0.817908	0.00103766	0.910323	0.00234202	0.817908	0.00103766	0.910323	0.00234202	0.922653	3.3845e-10	0.964233	7.64887e-10	0.922653	3.3845e-10	0.964233	7.64887e-10		1	1	1	1	1	1
3	21	domanska-2006a	im-1,1	imidazolium	so4-1	sulfates	toluene	aromatics	208.236	92.141	318.92	FALSE		0.7718		0.884306			TRUE	TRUE	TRUE	TRUE	TRUE		0.818562	0.00091481	0.910682	0.00206506	0.818562	0.00091481	0.910682	0.00206506	0.925524	2.4952e-10	0.965618	5.63908e-10	0.925524	2.4952e-10	0.965618	5.63908e-10		1	1	1	1	1	1
3	21	domanska-2006a	im-1,1	imidazolium	so4-1	sulfates	toluene	aromatics	208.236	92.141	313.26	FALSE		0.8042		0.902745			TRUE	TRUE	TRUE	TRUE	TRUE		0.819171	0.00077275	0.911015	0.00174469	0.819171	0.00077275	0.911015	0.00174469	0.929081	1.659e-10	0.967328	3.74929e-10	0.929081	1.659e-10	0.967328	3.74929e-10		1	1	1	1	1	1
3	21	domanska-2006a	im-1,1	imidazolium	so4-1	sulfates	toluene	aromatics	208.236	92.141	310.03	FALSE		0.8547		0.93004			TRUE	TRUE	TRUE	TRUE	TRUE		0.819393	0.00069989	0.911137	0.00158034	0.819393	0.00069989	0.911137	0.00158034	0.931028	1.3057e-10	0.968261	2.95084e-10	0.931028	1.3057e-10	0.968261	2.95084e-10		1	1	1	1	1	1
3	21	domanska-2006a	im-1,1	imidazolium	so4-1	sulfates	toluene	aromatics	208.236	92.141	309.59	FALSE		0.8931		0.949701			TRUE	TRUE	TRUE	TRUE	TRUE		0.819416	0.0006904	0.911149	0.00155893	0.819416	0.0006904	0.911149	0.00155893	0.931289	1.2633e-10	0.968385	2.85502e-10	0.931289	1.2633e-10	0.968385	2.85502e-10		1	1	1	1	1	1
3	21	domanska-2006a	im-1,1	imidazolium	so4-1	sulfates	toluene	aromatics	208.236	92.141	308.12	FALSE		0.9224		0.964111			TRUE	TRUE	TRUE	TRUE	TRUE		0.81948	0.00065945	0.911184	0.0014891	0.81948	0.00065945	0.911184	0.0014891	0.932152	1.1307e-10	0.968798	2.55535e-10	0.932152	1.1307e-10	0.968798	2.55535e-10		1	1	1	1	1	1
3	21	domanska-2006a	im-1,1	imidazolium	so4-1	sulfates	toluene	aromatics	208.236	92.141	305.65	FALSE		1		1			TRUE	TRUE	TRUE	TRUE	TRUE		0.819542	0.00060992	0.911218	0.00137734	0.819542	0.00060992	0.911218	0.00137734	0.933576	9.3622e-11	0.969478	2.11583e-10	0.933576	9.3622e-11	0.969478	2.11583e-10		1	1	1	1	1	1
3	22	domanska-2006a	im-1,1	imidazolium	so4-1	sulfates	ethylbenzene	aromatics	208.236	106.168	408.78	FALSE		0.8222		0.900695			TRUE	TRUE	TRUE	TRUE	TRUE		0.862383	0.00509216	0.924762	0.00993901	0.862383	0.00509216	0.924762	0.00993901	0.923303	1.1538e-08	0.959369	2.26304e-08	0.923303	1.1538e-08	0.959369	2.26304e-08		1	1	1	1	1	1
3	22	domanska-2006a	im-1,1	imidazolium	so4-1	sulfates	ethylbenzene	aromatics	208.236	106.168	403.74	FALSE		0.828		0.904233			TRUE	TRUE	TRUE	TRUE	TRUE		0.864747	0.00462625	0.926146	0.00903367	0.864747	0.00462625	0.926146	0.00903367	0.92708	9.074e-09	0.961444	1.77976e-08	0.92708	9.074e-09	0.961444	1.77976e-08		1	1	1	1	1	1
3	22	domanska-2006a	im-1,1	imidazolium	so4-1	sulfates	ethylbenzene	aromatics	208.236	106.168	399.92	FALSE		0.8311		0.906115			TRUE	TRUE	TRUE	TRUE	TRUE		0.866465	0.00429478	0.92715	0.00838907	0.866465	0.00429478	0.92715	0.00838907	0.929817	7.5358e-09	0.962943	1.47806e-08	0.929817	7.5358e-09	0.962943	1.47806e-08		1	1	1	1	1	1
3	22	domanska-2006a	im-1,1	imidazolium	so4-1	sulfates	ethylbenzene	aromatics	208.236	106.168	391.97	FALSE		0.8394		0.911123			TRUE	TRUE	TRUE	TRUE	TRUE		0.869837	0.00366188	0.929115	0.00715715	0.869837	0.00366188	0.929115	0.00715715	0.935189	5.0651e-09	0.965872	9.9346e-09	0.935189	5.0651e-09	0.965872	9.9346e-09		1	1	1	1	1	1
3	22	domanska-2006a	im-1,1	imidazolium	so4-1	sulfates	ethylbenzene	aromatics	208.236	106.168	387.87	FALSE		0.8428		0.913161			TRUE	TRUE	TRUE	TRUE	TRUE		0.871468	0.00336408	0.930063	0.00657697	0.871468	0.00336408	0.930063	0.00657697	0.937799	4.1023e-09	0.96729	8.04618e-09	0.937799	4.1023e-09	0.96729	8.04618e-09		1	1	1	1	1	1
3	22	domanska-2006a	im-1,1	imidazolium	so4-1	sulfates	ethylbenzene	aromatics	208.236	106.168	371.42	FALSE		0.856		0.921007			TRUE	TRUE	TRUE	TRUE	TRUE		0.877255	0.00234775	0.933413	0.00459446	0.877255	0.00234775	0.933413	0.00459446	0.94727	1.6843e-09	0.972403	3.30356e-09	0.94727	1.6843e-09	0.972403	3.30356e-09		1	1	1	1	1	1
3	22	domanska-2006a	im-1,1	imidazolium	so4-1	sulfates	ethylbenzene	aromatics	208.236	106.168	362.02	FALSE		0.8653		0.926469			TRUE	TRUE	TRUE	TRUE	TRUE		0.880003	0.00188273	0.934997	0.00368608	0.880003	0.00188273	0.934997	0.00368608	0.952033	9.7809e-10	0.974956	1.91841e-09	0.952033	9.7809e-10	0.974956	1.91841e-09		1	1	1	1	1	1
3	22	domanska-2006a	im-1,1	imidazolium	so4-1	sulfates	ethylbenzene	aromatics	208.236	106.168	353.22	FALSE		0.8723		0.930545			TRUE	TRUE	TRUE	TRUE	TRUE		0.882187	0.0015144	0.936253	0.002966	0.882187	0.0015144	0.936253	0.002966	0.956112	5.7325e-10	0.977132	1.12436e-09	0.956112	5.7325e-10	0.977132	1.12436e-09		1	1	1	1	1	1
3	22	domanska-2006a	im-1,1	imidazolium	so4-1	sulfates	ethylbenzene	aromatics	208.236	106.168	341.5	FALSE		0.8862		0.938552			TRUE	TRUE	TRUE	TRUE	TRUE		0.884482	0.00111293	0.937569	0.00218055	0.884482	0.00111293	0.937569	0.00218055	0.961024	2.6986e-10	0.979741	5.29299e-10	0.961024	2.6986e-10	0.979741	5.29299e-10		1	1	1	1	1	1
3	22	domanska-2006a	im-1,1	imidazolium	so4-1	sulfates	ethylbenzene	aromatics	208.236	106.168	326.99	FALSE		0.9029		0.94802			TRUE	TRUE	TRUE	TRUE	TRUE		0.886272	0.00073643	0.938594	0.0014434	0.886272	0.00073643	0.938594	0.0014434	0.966368	9.8629e-11	0.982565	1.93449e-10	0.966368	9.8629e-11	0.982565	1.93449e-10		1	1	1	1	1	1
3	22	domanska-2006a	im-1,1	imidazolium	so4-1	sulfates	ethylbenzene	aromatics	208.236	106.168	301.88	FALSE		0.9207		0.957934			TRUE	TRUE	TRUE	TRUE	TRUE		0.886209	0.00032749	0.938557	0.000642131	0.886209	0.00032749	0.938557	0.000642131	0.973967	1.377e-11	0.986556	2.70082e-11	0.973967	1.377e-11	0.986556	2.70082e-11		1	1	1	1	1	1
3	23	domanska-2006a	im-1,1	imidazolium	so4-1	sulfates	n-propylbenzene	aromatics	208.236	120.195	428.26	FALSE		0.857		0.912148			TRUE	TRUE	TRUE	TRUE	TRUE		0.907596	0.00585937	0.944496	0.0101079	0.907596	0.00585937	0.944496	0.0101079	0.954751	1.0472e-08	0.973373	1.81426e-08	0.954751	1.0472e-08	0.973373	1.81426e-08		1	1	1	1	1	1
3	23	domanska-2006a	im-1,1	imidazolium	so4-1	sulfates	n-propylbenzene	aromatics	208.236	120.195	416.84	FALSE		0.861		0.914759			TRUE	TRUE	TRUE	TRUE	TRUE		0.911676	0.00476297	0.947041	0.00822308	0.911676	0.00476297	0.947041	0.00822308	0.960038	6.1688e-09	0.976537	1.06874e-08	0.960038	6.1688e-09	0.976537	1.06874e-08		1	1	1	1	1	1
3	23	domanska-2006a	im-1,1	imidazolium	so4-1	sulfates	n-propylbenzene	aromatics	208.236	120.195	388.86	FALSE		0.8875		0.931821			TRUE	TRUE	TRUE	TRUE	TRUE		0.919954	0.00271835	0.952179	0.00470014	0.919954	0.00271835	0.952179	0.00470014	0.97064	1.4897e-09	0.98284	2.58088e-09	0.97064	1.4897e-09	0.98284	2.58088e-09		1	1	1	1	1	1
3	23	domanska-2006a	im-1,1	imidazolium	so4-1	sulfates	n-propylbenzene	aromatics	208.236	120.195	368.48	FALSE		0.8963		0.937399			TRUE	TRUE	TRUE	TRUE	TRUE		0.924418	0.00170706	0.954933	0.00295376	0.924418	0.00170706	0.954933	0.00295376	0.97665	4.6394e-10	0.986388	8.03769e-10	0.97665	4.6394e-10	0.986388	8.03769e-10		1	1	1	1	1	1
3	23	domanska-2006a	im-1,1	imidazolium	so4-1	sulfates	n-propylbenzene	aromatics	208.236	120.195	351.52	FALSE		0.9087		0.945185			TRUE	TRUE	TRUE	TRUE	TRUE		0.927054	0.0011093	0.956555	0.00192028	0.927054	0.0011093	0.956555	0.00192028	0.980766	1.5876e-10	0.988807	2.75049e-10	0.980766	1.5876e-10	0.988807	2.75049e-10		1	1	1	1	1	1
3	23	domanska-2006a	im-1,1	imidazolium	so4-1	sulfates	n-propylbenzene	aromatics	208.236	120.195	348.37	FALSE		0.9099		0.945934			TRUE	TRUE	TRUE	TRUE	TRUE		0.927427	0.00101894	0.956785	0.00176398	0.927427	0.00101894	0.956785	0.00176398	0.981453	1.2861e-10	0.98921	2.22815e-10	0.981453	1.2861e-10	0.98921	2.22815e-10		1	1	1	1	1	1
3	23	domanska-2006a	im-1,1	imidazolium	so4-1	sulfates	n-propylbenzene	aromatics	208.236	120.195	341.1	FALSE		0.9125		0.947554			TRUE	TRUE	TRUE	TRUE	TRUE		0.928142	0.0008322	0.957224	0.0014409	0.928142	0.0008322	0.957224	0.0014409	0.982953	7.7947e-11	0.990089	1.35042e-10	0.982953	7.7947e-11	0.990089	1.35042e-10		1	1	1	1	1	1
3	23	domanska-2006a	im-1,1	imidazolium	so4-1	sulfates	n-propylbenzene	aromatics	208.236	120.195	312.17	FALSE		0.9261		0.955969			TRUE	TRUE	TRUE	TRUE	TRUE		0.9287	0.00033715	0.957566	0.000583963	0.9287	0.00033715	0.957566	0.000583963	0.987881	8.4373e-12	0.992969	1.46175e-11	0.987881	8.4373e-12	0.992969	1.46175e-11		1	1	1	1	1	1
3	24	domanska-2006a	im-1,1	imidazolium	so4-1	sulfates	o-xylene	aromatics	208.236	106.168	410.68	FALSE		0.6231		0.764296			TRUE	TRUE	TRUE	TRUE	TRUE		0.855222	0.00562186	0.920547	0.0109673	0.855222	0.00562186	0.920547	0.0109673	0.906123	1.7002e-08	0.949829	3.33474e-08	0.906123	1.7002e-08	0.949829	3.33474e-08		1	1	1	1	1	1
3	24	domanska-2006a	im-1,1	imidazolium	so4-1	sulfates	o-xylene	aromatics	208.236	106.168	393.06	FALSE		0.6516		0.785789			TRUE	TRUE	TRUE	TRUE	TRUE		0.86371	0.00399898	0.925539	0.00781349	0.86371	0.00399898	0.925539	0.00781349	0.920964	7.3616e-09	0.95808	1.44389e-08	0.920964	7.3616e-09	0.95808	1.44389e-08		1	1	1	1	1	1
3	24	domanska-2006a	im-1,1	imidazolium	so4-1	sulfates	o-xylene	aromatics	208.236	106.168	374.67	FALSE		0.6896		0.813346			TRUE	TRUE	TRUE	TRUE	TRUE		0.871059	0.00270713	0.929825	0.00529593	0.871059	0.00270713	0.929825	0.00529593	0.933928	2.8405e-09	0.965186	5.57131e-09	0.933928	2.8405e-09	0.965186	5.57131e-09		1	1	1	1	1	1
3	24	domanska-2006a	im-1,1	imidazolium	so4-1	sulfates	o-xylene	aromatics	208.236	106.168	362.93	FALSE		0.7204		0.834808			TRUE	TRUE	TRUE	TRUE	TRUE		0.874915	0.00206584	0.932061	0.00404387	0.874915	0.00206584	0.932061	0.00404387	0.94107	1.4736e-09	0.969061	2.89029e-09	0.94107	1.4736e-09	0.969061	2.89029e-09		1	1	1	1	1	1
3	24	domanska-2006a	im-1,1	imidazolium	so4-1	sulfates	o-xylene	aromatics	208.236	106.168	355.96	FALSE		0.7394		0.847678			TRUE	TRUE	TRUE	TRUE	TRUE		0.876882	0.0017442	0.933197	0.00341532	0.876882	0.0017442	0.933197	0.00341532	0.944941	9.7842e-10	0.97115	1.91906e-09	0.944941	9.7842e-10	0.97115	1.91906e-09		1	1	1	1	1	1
3	24	domanska-2006a	im-1,1	imidazolium	so4-1	sulfates	o-xylene	aromatics	208.236	106.168	352.72	FALSE		0.7538		0.85725			TRUE	TRUE	TRUE	TRUE	TRUE		0.877711	0.00160844	0.933676	0.00314989	0.877711	0.00160844	0.933676	0.00314989	0.946654	8.0449e-10	0.972071	1.57791e-09	0.946654	8.0449e-10	0.972071	1.57791e-09		1	1	1	1	1	1
3	24	domanska-2006a	im-1,1	imidazolium	so4-1	sulfates	o-xylene	aromatics	208.236	106.168	339.61	FALSE		0.7793		0.873828			TRUE	TRUE	TRUE	TRUE	TRUE		0.880494	0.00114004	0.935279	0.00223361	0.880494	0.00114004	0.935279	0.00223361	0.953062	3.5104e-10	0.975506	6.88524e-10	0.953062	3.5104e-10	0.975506	6.88524e-10		1	1	1	1	1	1
3	24	domanska-2006a	im-1,1	imidazolium	so4-1	sulfates	o-xylene	aromatics	208.236	106.168	328.98	FALSE		0.8042		0.889575			TRUE	TRUE	TRUE	TRUE	TRUE		0.882035	0.00084469	0.936165	0.00165542	0.882035	0.00084469	0.936165	0.00165542	0.957693	1.7084e-10	0.977973	3.35082e-10	0.957693	1.7084e-10	0.977973	3.35082e-10		1	1	1	1	1	1
3	24	domanska-2006a	im-1,1	imidazolium	so4-1	sulfates	o-xylene	aromatics	208.236	106.168	322.4	FALSE		0.8351		0.908534			TRUE	TRUE	TRUE	TRUE	TRUE		0.882642	0.0006945	0.936513	0.00136127	0.882642	0.0006945	0.936513	0.00136127	0.960329	1.0685e-10	0.979373	2.09574e-10	0.960329	1.0685e-10	0.979373	2.09574e-10		1	1	1	1	1	1
3	24	domanska-2006a	im-1,1	imidazolium	so4-1	sulfates	o-xylene	aromatics	208.236	106.168	315.8	FALSE		0.8684		0.928278			TRUE	TRUE	TRUE	TRUE	TRUE		0.882966	0.00056593	0.9367	0.0011094	0.882966	0.00056593	0.9367	0.0011094	0.962809	6.5446e-11	0.980686	1.28365e-10	0.962809	6.5446e-11	0.980686	1.28365e-10		1	1	1	1	1	1
3	24	domanska-2006a	im-1,1	imidazolium	so4-1	sulfates	o-xylene	aromatics	208.236	106.168	312.92	FALSE		0.9035		0.948357			TRUE	TRUE	TRUE	TRUE	TRUE		0.883014	0.00051615	0.936727	0.00101187	0.883014	0.00051615	0.936727	0.00101187	0.963841	5.2505e-11	0.981232	1.02982e-10	0.963841	5.2505e-11	0.981232	1.02982e-10		1	1	1	1	1	1
3	24	domanska-2006a	im-1,1	imidazolium	so4-1	sulfates	o-xylene	aromatics	208.236	106.168	311.42	FALSE		0.9527		0.975312			TRUE	TRUE	TRUE	TRUE	TRUE		0.883016	0.00049165	0.936728	0.000963858	0.883016	0.00049165	0.936728	0.000963858	0.964368	4.6738e-11	0.98151	9.16711e-11	0.964368	4.6738e-11	0.98151	9.16711e-11		1	1	1	1	1	1
3	25	domanska-2006a	im-1,1	imidazolium	so4-1	sulfates	m-xylene	aromatics	208.236	106.168	415.97	FALSE		0.6238		0.764832			TRUE	TRUE	TRUE	TRUE	TRUE		0.869054	0.00545718	0.928659	0.0106478	0.869054	0.00545718	0.928659	0.0106478	0.919034	1.0772e-08	0.957014	2.1128e-08	0.919034	1.0772e-08	0.957014	2.1128e-08		1	1	1	1	1	1
3	25	domanska-2006a	im-1,1	imidazolium	so4-1	sulfates	m-xylene	aromatics	208.236	106.168	402.19	FALSE		0.6416		0.778331			TRUE	TRUE	TRUE	TRUE	TRUE		0.875473	0.00419812	0.932383	0.00820102	0.875473	0.00419812	0.932383	0.00820102	0.929497	5.5785e-09	0.962768	1.09416e-08	0.929497	5.5785e-09	0.962768	1.09416e-08		1	1	1	1	1	1
3	25	domanska-2006a	im-1,1	imidazolium	so4-1	sulfates	m-xylene	aromatics	208.236	106.168	394.46	FALSE		0.6579		0.790443			TRUE	TRUE	TRUE	TRUE	TRUE		0.878728	0.00359432	0.934262	0.00702556	0.878728	0.00359432	0.934262	0.00702556	0.934765	3.7851e-09	0.965641	7.42403e-09	0.934765	3.7851e-09	0.965641	7.42403e-09		1	1	1	1	1	1
3	25	domanska-2006a	im-1,1	imidazolium	so4-1	sulfates	m-xylene	aromatics	208.236	106.168	380.92	FALSE		0.69		0.81363			TRUE	TRUE	TRUE	TRUE	TRUE		0.883823	0.00269576	0.937191	0.00527375	0.883823	0.00269576	0.937191	0.00527375	0.943073	1.8512e-09	0.970143	3.63091e-09	0.943073	1.8512e-09	0.970143	3.63091e-09		1	1	1	1	1	1
3	25	domanska-2006a	im-1,1	imidazolium	so4-1	sulfates	m-xylene	aromatics	208.236	106.168	370.98	FALSE		0.7134		0.829997			TRUE	TRUE	TRUE	TRUE	TRUE		0.887064	0.00215239	0.939046	0.00421294	0.887064	0.00215239	0.939046	0.00421294	0.948506	1.0607e-09	0.973066	2.08044e-09	0.948506	1.0607e-09	0.973066	2.08044e-09		1	1	1	1	1	1
3	25	domanska-2006a	im-1,1	imidazolium	so4-1	sulfates	m-xylene	aromatics	208.236	106.168	362.93	FALSE		0.7383		0.84694			TRUE	TRUE	TRUE	TRUE	TRUE		0.889367	0.00177681	0.94036	0.00347906	0.889367	0.00177681	0.94036	0.00347906	0.952534	6.6115e-10	0.975224	1.29677e-09	0.952534	6.6115e-10	0.975224	1.29677e-09		1	1	1	1	1	1
3	25	domanska-2006a	im-1,1	imidazolium	so4-1	sulfates	m-xylene	aromatics	208.236	106.168	348.56	FALSE		0.7733		0.869969			TRUE	TRUE	TRUE	TRUE	TRUE		0.892731	0.00123294	0.942274	0.0024154	0.892731	0.00123294	0.942274	0.0024154	0.958982	2.6966e-10	0.978658	5.28906e-10	0.958982	2.6966e-10	0.978658	5.28906e-10		1	1	1	1	1	1
3	25	domanska-2006a	im-1,1	imidazolium	so4-1	sulfates	m-xylene	aromatics	208.236	106.168	345.63	FALSE		0.7794		0.873892			TRUE	TRUE	TRUE	TRUE	TRUE		0.893293	0.00113995	0.942593	0.00223343	0.893293	0.00113995	0.942593	0.00223343	0.960188	2.2259e-10	0.979298	4.36584e-10	0.960188	2.2259e-10	0.979298	4.36584e-10		1	1	1	1	1	1
3	25	domanska-2006a	im-1,1	imidazolium	so4-1	sulfates	m-xylene	aromatics	208.236	106.168	333.28	FALSE		0.8036		0.8892			TRUE	TRUE	TRUE	TRUE	TRUE		0.895176	0.00080626	0.943661	0.00158016	0.895176	0.00080626	0.943661	0.00158016	0.964909	9.5594e-11	0.981796	1.87496e-10	0.964909	9.5594e-11	0.981796	1.87496e-10		1	1	1	1	1	1
3	25	domanska-2006a	im-1,1	imidazolium	so4-1	sulfates	m-xylene	aromatics	208.236	106.168	324.17	FALSE		0.8246		0.902162			TRUE	TRUE	TRUE	TRUE	TRUE		0.896026	0.00061361	0.944143	0.00120281	0.896026	0.00061361	0.944143	0.00120281	0.968039	4.9195e-11	0.983446	9.64902e-11	0.968039	4.9195e-11	0.983446	9.64902e-11		1	1	1	1	1	1
3	25	domanska-2006a	im-1,1	imidazolium	so4-1	sulfates	m-xylene	aromatics	208.236	106.168	319.96	FALSE		0.8462		0.915193			TRUE	TRUE	TRUE	TRUE	TRUE		0.896254	0.00053795	0.944272	0.00105458	0.896254	0.00053795	0.944272	0.00105458	0.969393	3.5735e-11	0.984157	7.009e-11	0.969393	3.5735e-11	0.984157	7.009e-11		1	1	1	1	1	1
3	25	domanska-2006a	im-1,1	imidazolium	so4-1	sulfates	m-xylene	aromatics	208.236	106.168	315.57	FALSE		0.8635		0.925416			TRUE	TRUE	TRUE	TRUE	TRUE		0.896374	0.00046717	0.94434	0.000915887	0.896374	0.00046717	0.94434	0.000915887	0.970745	2.5375e-11	0.984867	4.97701e-11	0.970745	2.5375e-11	0.984867	4.97701e-11		1	1	1	1	1	1
3	25	domanska-2006a	im-1,1	imidazolium	so4-1	sulfates	m-xylene	aromatics	208.236	106.168	315.08	FALSE		0.8882		0.939695			TRUE	TRUE	TRUE	TRUE	TRUE		0.89638	0.00045975	0.944343	0.000901347	0.89638	0.00045975	0.944343	0.000901347	0.970892	2.4409e-11	0.984945	4.78754e-11	0.970892	2.4409e-11	0.984945	4.78754e-11		1	1	1	1	1	1
3	25	domanska-2006a	im-1,1	imidazolium	so4-1	sulfates	m-xylene	aromatics	208.236	106.168	306.34	FALSE		0.9436		0.970427			TRUE	TRUE	TRUE	TRUE	TRUE		0.896212	0.00034263	0.944248	0.000671807	0.896212	0.00034263	0.944248	0.000671807	0.9734	1.1967e-11	0.986259	2.34719e-11	0.9734	1.1967e-11	0.986259	2.34719e-11		1	1	1	1	1	1
3	26	domanska-2006a	im-1,1	imidazolium	so4-1	sulfates	p-xylene	aromatics	208.236	106.168	411.5	FALSE		0.6297		0.769338			TRUE	TRUE	TRUE	TRUE	TRUE		0.871922	0.00490327	0.930326	0.00957206	0.871922	0.00490327	0.930326	0.00957206	0.926239	7.4842e-09	0.960983	1.46794e-08	0.926239	7.4842e-09	0.960983	1.46794e-08		1	1	1	1	1	1
3	26	domanska-2006a	im-1,1	imidazolium	so4-1	sulfates	p-xylene	aromatics	208.236	106.168	404.18	FALSE		0.6432		0.77953			TRUE	TRUE	TRUE	TRUE	TRUE		0.875266	0.00425975	0.932264	0.00832092	0.875266	0.00425975	0.932264	0.00832092	0.931456	5.2472e-09	0.963838	1.02918e-08	0.931456	5.2472e-09	0.963838	1.02918e-08		1	1	1	1	1	1
3	26	domanska-2006a	im-1,1	imidazolium	so4-1	sulfates	p-xylene	aromatics	208.236	106.168	388.35	FALSE		0.6743		0.802398			TRUE	TRUE	TRUE	TRUE	TRUE		0.88174	0.00308453	0.935996	0.00603205	0.88174	0.00308453	0.935996	0.00603205	0.941525	2.3327e-09	0.969307	4.57532e-09	0.941525	2.3327e-09	0.969307	4.57532e-09		1	1	1	1	1	1
3	26	domanska-2006a	im-1,1	imidazolium	so4-1	sulfates	p-xylene	aromatics	208.236	106.168	378.37	FALSE		0.6926		0.81547			TRUE	TRUE	TRUE	TRUE	TRUE		0.88528	0.00248058	0.938026	0.00485379	0.88528	0.00248058	0.938026	0.00485379	0.947114	1.3537e-09	0.972319	2.65512e-09	0.947114	1.3537e-09	0.972319	2.65512e-09		1	1	1	1	1	1
3	26	domanska-2006a	im-1,1	imidazolium	so4-1	sulfates	p-xylene	aromatics	208.236	106.168	372.96	FALSE		0.7088		0.826814			TRUE	TRUE	TRUE	TRUE	TRUE		0.88702	0.00219301	0.939021	0.00429228	0.88702	0.00219301	0.939021	0.00429228	0.949925	9.9614e-10	0.973827	1.95381e-09	0.949925	9.9614e-10	0.973827	1.95381e-09		1	1	1	1	1	1
3	26	domanska-2006a	im-1,1	imidazolium	so4-1	sulfates	p-xylene	aromatics	208.236	106.168	365.87	FALSE		0.7311		0.84209			TRUE	TRUE	TRUE	TRUE	TRUE		0.889107	0.00185524	0.940212	0.00363236	0.889107	0.00185524	0.940212	0.00363236	0.95339	6.5762e-10	0.97568	1.28984e-09	0.95339	6.5762e-10	0.97568	1.28984e-09		1	1	1	1	1	1
3	26	domanska-2006a	im-1,1	imidazolium	so4-1	sulfates	p-xylene	aromatics	208.236	106.168	355.93	FALSE		0.7507		0.855202			TRUE	TRUE	TRUE	TRUE	TRUE		0.891647	0.00145022	0.941658	0.00284048	0.891647	0.00145022	0.941658	0.00284048	0.957862	3.5754e-10	0.978063	7.01273e-10	0.957862	3.5754e-10	0.978063	7.01273e-10		1	1	1	1	1	1
3	26	domanska-2006a	im-1,1	imidazolium	so4-1	sulfates	p-xylene	aromatics	208.236	106.168	349.17	FALSE		0.7673		0.866085			TRUE	TRUE	TRUE	TRUE	TRUE		0.893109	0.00121628	0.942489	0.0023828	0.893109	0.00121628	0.942489	0.0023828	0.960664	2.3168e-10	0.979551	4.54413e-10	0.960664	2.3168e-10	0.979551	4.54413e-10		1	1	1	1	1	1
3	26	domanska-2006a	im-1,1	imidazolium	so4-1	sulfates	p-xylene	aromatics	208.236	106.168	340.79	FALSE		0.7881		0.879442			TRUE	TRUE	TRUE	TRUE	TRUE		0.894606	0.00096808	0.943339	0.00189701	0.894606	0.00096808	0.943339	0.00189701	0.96389	1.3215e-10	0.981258	2.59197e-10	0.96389	1.3215e-10	0.981258	2.59197e-10		1	1	1	1	1	1
3	26	domanska-2006a	im-1,1	imidazolium	so4-1	sulfates	p-xylene	aromatics	208.236	106.168	328.98	FALSE		0.8087		0.892375			TRUE	TRUE	TRUE	TRUE	TRUE		0.896089	0.00068748	0.944178	0.00134752	0.896089	0.00068748	0.944178	0.00134752	0.968007	5.7093e-11	0.983429	1.11981e-10	0.968007	5.7093e-11	0.983429	1.11981e-10		1	1	1	1	1	1
3	26	domanska-2006a	im-1,1	imidazolium	so4-1	sulfates	p-xylene	aromatics	208.236	106.168	322.59	FALSE		0.8304		0.90569			TRUE	TRUE	TRUE	TRUE	TRUE		0.896562	0.00056509	0.944446	0.00110776	0.896562	0.00056509	0.944446	0.00110776	0.970041	3.5344e-11	0.984498	6.93231e-11	0.970041	3.5344e-11	0.984498	6.93231e-11		1	1	1	1	1	1
3	26	domanska-2006a	im-1,1	imidazolium	so4-1	sulfates	p-xylene	aromatics	208.236	106.168	317.31	FALSE		0.8638		0.925592			TRUE	TRUE	TRUE	TRUE	TRUE		0.896768	0.00047763	0.944562	0.000936385	0.896768	0.00047763	0.944562	0.000936385	0.971627	2.3438e-11	0.98533	4.59709e-11	0.971627	2.3438e-11	0.98533	4.59709e-11		1	1	1	1	1	1
3	26	domanska-2006a	im-1,1	imidazolium	so4-1	sulfates	p-xylene	aromatics	208.236	106.168	314.31	FALSE		0.8934		0.942654			TRUE	TRUE	TRUE	TRUE	TRUE		0.896806	0.000433	0.944584	0.000848925	0.896806	0.000433	0.944584	0.000848925	0.972491	1.8447e-11	0.985783	3.61816e-11	0.972491	1.8447e-11	0.985783	3.61816e-11		1	1	1	1	1	1
3	26	domanska-2006a	im-1,1	imidazolium	so4-1	sulfates	p-xylene	aromatics	208.236	106.168	310.57	FALSE		0.9226		0.958982			TRUE	TRUE	TRUE	TRUE	TRUE		0.896771	0.00038211	0.944564	0.000749188	0.896771	0.00038211	0.944564	0.000749188	0.973533	1.3597e-11	0.986328	2.66689e-11	0.973533	1.3597e-11	0.986328	2.66689e-11		1	1	1	1	1	1
3	26	domanska-2006a	im-1,1	imidazolium	so4-1	sulfates	p-xylene	aromatics	208.236	106.168	309.56	FALSE		0.9602		0.979304			TRUE	TRUE	TRUE	TRUE	TRUE		0.896746	0.00036923	0.94455	0.000723944	0.896746	0.00036923	0.94455	0.000723944	0.973807	1.2506e-11	0.986472	2.4529e-11	0.973807	1.2506e-11	0.986472	2.4529e-11		1	1	1	1	1	1
4	1	domanska-2003	im-10,1	imidazolium	cl	inorganics	water	water	258.831	18.015	307.27	FALSE			0.4855		0.931308		TRUE	TRUE	TRUE	TRUE	TRUE										0.375109	0.0955709	0.896099	0.602893	0.374447	0.0964647	0.895835	0.605356		3	1	1	3	1	1
4	1	domanska-2003	im-10,1	imidazolium	cl	inorganics	water	water	258.831	18.015	314.13	FALSE			0.5353		0.943021		TRUE	TRUE	TRUE	TRUE	TRUE										0.366953	0.100337	0.8928	0.615736	0.366312	0.101157	0.892535	0.617873		3	1	1	3	1	1
4	1	domanska-2003	im-10,1	imidazolium	cl	inorganics	water	water	258.831	18.015	320.15	FALSE			0.6025		0.956096		TRUE	TRUE	TRUE	TRUE	TRUE										0.359572	0.104274	0.889707	0.625827	0.358971	0.105012	0.88945	0.627671		3	1	1	3	1	1
4	1	domanska-2003	im-10,1	imidazolium	cl	inorganics	water	water	258.831	18.015	322.49	FALSE			0.6275		0.960322		TRUE	TRUE	TRUE	TRUE	TRUE										0.356642	0.105739	0.88845	0.629471	0.356063	0.10645	0.888199	0.631218		3	1	1	3	1	1
4	1	domanska-2003	im-10,1	imidazolium	cl	inorganics	water	water	258.831	18.015	323.73	FALSE		0.6921		0.969966			TRUE	TRUE	TRUE	TRUE	TRUE										0.355075	0.106503	0.88777	0.631348	0.354509	0.1072	0.887524	0.633046		3	1	1	3	1	1
4	1	domanska-2003	im-10,1	imidazolium	cl	inorganics	water	water	258.831	18.015	321.13	FALSE		0.7595		0.978436			TRUE	TRUE	TRUE	TRUE	TRUE										0.358349	0.104891	0.889184	0.62737	0.357757	0.105618	0.88893	0.629172		3	1	1	3	1	1
4	1	domanska-2003	im-10,1	imidazolium	cl	inorganics	water	water	258.831	18.015	318.07	FALSE		0.7996		0.982855			TRUE	TRUE	TRUE	TRUE	TRUE										0.362147	0.10294	0.890797	0.622459	0.361529	0.103707	0.890537	0.624402		3	1	1	3	1	1
4	1	domanska-2003	im-10,1	imidazolium	cl	inorganics	water	water	258.831	18.015	312.38	FALSE		0.8534		0.988185			TRUE	TRUE	TRUE	TRUE	TRUE										0.369059	0.099147	0.893663	0.612595	0.368408	0.0999867	0.893397	0.614815		3	1	1	3	1	1
5	1	siporska-2015	im-10,1	imidazolium	ntf2	NTf2 derivatives	iodobenzene	alkyl halides	503.524	204.01	288.1	FALSE			0.0172		0.0414063		TRUE	TRUE	TRUE	TRUE	TRUE										0.36267	2.0106e-06	0.58411	4.96242e-06	0.360302	2.1265e-06	0.581616	5.24847e-06		3	3	1	3	3	1
5	1	siporska-2015	im-10,1	imidazolium	ntf2	NTf2 derivatives	iodobenzene	alkyl halides	503.524	204.01	289.1	FALSE			0.019		0.0456219		TRUE	TRUE	TRUE	TRUE	TRUE										0.359757	2.1091e-06	0.581039	5.20553e-06	0.357387	2.2311e-06	0.578529	5.50664e-06		3	3	1	3	3	1
5	1	siporska-2015	im-10,1	imidazolium	ntf2	NTf2 derivatives	iodobenzene	alkyl halides	503.524	204.01	289.8	FALSE			0.0212		0.050745		TRUE	TRUE	TRUE	TRUE	TRUE										0.357727	2.1805e-06	0.57889	5.38175e-06	0.355354	2.307e-06	0.576367	5.69397e-06		3	3	1	3	3	1
5	1	siporska-2015	im-10,1	imidazolium	ntf2	NTf2 derivatives	iodobenzene	alkyl halides	503.524	204.01	290.4	FALSE			0.0235		0.0560668		TRUE	TRUE	TRUE	TRUE	TRUE										0.355992	2.2435e-06	0.577047	5.53724e-06	0.353617	2.3738e-06	0.574512	5.85884e-06		3	3	1	3	3	1
5	1	siporska-2015	im-10,1	imidazolium	ntf2	NTf2 derivatives	iodobenzene	alkyl halides	503.524	204.01	291	FALSE			0.0259		0.061583		TRUE	TRUE	TRUE	TRUE	TRUE										0.35426	2.308e-06	0.575199	5.69643e-06	0.351882	2.4424e-06	0.572654	6.02815e-06		3	3	1	3	3	1
5	1	siporska-2015	im-10,1	imidazolium	ntf2	NTf2 derivatives	iodobenzene	alkyl halides	503.524	204.01	291.7	FALSE			0.0288		0.0681987		TRUE	TRUE	TRUE	TRUE	TRUE										0.352247	2.3854e-06	0.573045	5.88747e-06	0.349867	2.5246e-06	0.570487	6.23103e-06		3	3	1	3	3	1
5	1	siporska-2015	im-10,1	imidazolium	ntf2	NTf2 derivatives	iodobenzene	alkyl halides	503.524	204.01	291.9	FALSE			0.0319		0.0752111		TRUE	TRUE	TRUE	TRUE	TRUE										0.351673	2.4079e-06	0.572429	5.943e-06	0.349292	2.5485e-06	0.569868	6.29002e-06		3	3	1	3	3	1
5	1	siporska-2015	im-10,1	imidazolium	ntf2	NTf2 derivatives	iodobenzene	alkyl halides	503.524	204.01	291.9	FALSE			0.0359		0.0841698		TRUE	TRUE	TRUE	TRUE	TRUE										0.351673	2.4079e-06	0.572429	5.943e-06	0.349292	2.5485e-06	0.569868	6.29002e-06		3	3	1	3	3	1
5	1	siporska-2015	im-10,1	imidazolium	ntf2	NTf2 derivatives	iodobenzene	alkyl halides	503.524	204.01	291.9	FALSE			0.0395		0.0921475		TRUE	TRUE	TRUE	TRUE	TRUE										0.351673	2.4079e-06	0.572429	5.943e-06	0.349292	2.5485e-06	0.569868	6.29002e-06		3	3	1	3	3	1
5	1	siporska-2015	im-10,1	imidazolium	ntf2	NTf2 derivatives	iodobenzene	alkyl halides	503.524	204.01	291.9	FALSE		0.0428		0.0993908			TRUE	TRUE	TRUE	TRUE	TRUE										0.351673	2.4079e-06	0.572429	5.943e-06	0.349292	2.5485e-06	0.569868	6.29002e-06		3	3	1	3	3	1
5	1	siporska-2015	im-10,1	imidazolium	ntf2	NTf2 derivatives	iodobenzene	alkyl halides	503.524	204.01	292	FALSE		0.047		0.108515			TRUE	TRUE	TRUE	TRUE	TRUE										0.351386	2.4192e-06	0.572121	5.97089e-06	0.349005	2.5605e-06	0.569558	6.31963e-06		3	3	1	3	3	1
5	1	siporska-2015	im-10,1	imidazolium	ntf2	NTf2 derivatives	iodobenzene	alkyl halides	503.524	204.01	292	FALSE		0.0511		0.11732			TRUE	TRUE	TRUE	TRUE	TRUE										0.351386	2.4192e-06	0.572121	5.97089e-06	0.349005	2.5605e-06	0.569558	6.31963e-06		3	3	1	3	3	1
5	1	siporska-2015	im-10,1	imidazolium	ntf2	NTf2 derivatives	iodobenzene	alkyl halides	503.524	204.01	292	FALSE		0.0548		0.125182			TRUE	TRUE	TRUE	TRUE	TRUE										0.351386	2.4192e-06	0.572121	5.97089e-06	0.349005	2.5605e-06	0.569558	6.31963e-06		3	3	1	3	3	1
5	1	siporska-2015	im-10,1	imidazolium	ntf2	NTf2 derivatives	iodobenzene	alkyl halides	503.524	204.01	291.6	FALSE		0.0598		0.135682			TRUE	TRUE	TRUE	TRUE	TRUE										0.352534	2.3742e-06	0.573353	5.85982e-06	0.350154	2.5127e-06	0.570797	6.20166e-06		3	3	1	3	3	1
5	1	siporska-2015	im-10,1	imidazolium	ntf2	NTf2 derivatives	iodobenzene	alkyl halides	503.524	204.01	291.3	FALSE		0.0638		0.143981			TRUE	TRUE	TRUE	TRUE	TRUE										0.353396	2.3409e-06	0.574276	5.77763e-06	0.351018	2.4773e-06	0.571725	6.11429e-06		3	3	1	3	3	1
5	1	siporska-2015	im-10,1	imidazolium	ntf2	NTf2 derivatives	iodobenzene	alkyl halides	503.524	204.01	290.9	FALSE		0.0679		0.152395			TRUE	TRUE	TRUE	TRUE	TRUE										0.35455	2.2972e-06	0.575509	5.66978e-06	0.35217	2.4308e-06	0.572963	5.99952e-06		3	3	1	3	3	1
5	1	siporska-2015	im-10,1	imidazolium	ntf2	NTf2 derivatives	iodobenzene	alkyl halides	503.524	204.01	290.4	FALSE		0.074		0.164744			TRUE	TRUE	TRUE	TRUE	TRUE										0.355992	2.2435e-06	0.577047	5.53724e-06	0.353617	2.3738e-06	0.574512	5.85884e-06		3	3	1	3	3	1
5	1	siporska-2015	im-10,1	imidazolium	ntf2	NTf2 derivatives	iodobenzene	alkyl halides	503.524	204.01	289.9	FALSE		0.0763		0.169348			TRUE	TRUE	TRUE	TRUE	TRUE										0.357438	2.1909e-06	0.578583	5.40742e-06	0.355064	2.318e-06	0.576058	5.72111e-06		3	3	1	3	3	1
5	1	siporska-2015	im-10,1	imidazolium	ntf2	NTf2 derivatives	iodobenzene	alkyl halides	503.524	204.01	289.3	FALSE		0.0791		0.174916			TRUE	TRUE	TRUE	TRUE	TRUE										0.359176	2.1293e-06	0.580425	5.25538e-06	0.356806	2.2525e-06	0.577912	5.55945e-06		3	3	1	3	3	1
5	1	siporska-2015	im-10,1	imidazolium	ntf2	NTf2 derivatives	iodobenzene	alkyl halides	503.524	204.01	288.4	FALSE		0.0825		0.181623			TRUE	TRUE	TRUE	TRUE	TRUE										0.361793	2.0397e-06	0.583187	5.03424e-06	0.359426	2.1574e-06	0.58069	5.32474e-06		3	3	1	3	3	1
5	2	forte-2011	im-10,1	imidazolium	ntf2	NTf2 derivatives	1,2-butanediol	alcohols	503.524	90.122	303.56	FALSE		0.7666		0.948323			TRUE	TRUE	TRUE	TRUE	TRUE																			3	3	10	3	3	10
5	2	forte-2011	im-10,1	imidazolium	ntf2	NTf2 derivatives	1,2-butanediol	alcohols	503.524	90.122	321.05	FALSE		0.7021		0.929418			TRUE	TRUE	TRUE	TRUE	TRUE																			3	3	10	3	3	10
5	2	forte-2011	im-10,1	imidazolium	ntf2	NTf2 derivatives	1,2-butanediol	alcohols	503.524	90.122	335.91	FALSE		0.6398		0.908459			TRUE	TRUE	TRUE	TRUE	TRUE																			3	3	10	3	3	10
5	2	forte-2011	im-10,1	imidazolium	ntf2	NTf2 derivatives	1,2-butanediol	alcohols	503.524	90.122	352.82	FALSE		0.5634		0.878194			TRUE	TRUE	TRUE	TRUE	TRUE																			3	3	10	3	3	10
5	2	forte-2011	im-10,1	imidazolium	ntf2	NTf2 derivatives	1,2-butanediol	alcohols	503.524	90.122	360.58	FALSE		0.5422		0.868718			TRUE	TRUE	TRUE	TRUE	TRUE																			3	3	10	3	3	10
5	2	forte-2011	im-10,1	imidazolium	ntf2	NTf2 derivatives	1,2-butanediol	alcohols	503.524	90.122	374.01	FALSE		0.4756		0.835179			TRUE	TRUE	TRUE	TRUE	TRUE																			3	3	10	3	3	10
5	2	forte-2011	im-10,1	imidazolium	ntf2	NTf2 derivatives	1,2-butanediol	alcohols	503.524	90.122	388.63	FALSE			0.3762		0.77114		TRUE	TRUE	TRUE	TRUE	TRUE																			3	3	10	3	3	10
5	2	forte-2011	im-10,1	imidazolium	ntf2	NTf2 derivatives	1,2-butanediol	alcohols	503.524	90.122	382.93	FALSE			0.2706		0.674561		TRUE	TRUE	TRUE	TRUE	TRUE																			3	3	10	3	3	10
5	2	forte-2011	im-10,1	imidazolium	ntf2	NTf2 derivatives	1,2-butanediol	alcohols	503.524	90.122	371.9	FALSE			0.2171		0.607739		TRUE	TRUE	TRUE	TRUE	TRUE																			3	3	10	3	3	10
5	2	forte-2011	im-10,1	imidazolium	ntf2	NTf2 derivatives	1,2-butanediol	alcohols	503.524	90.122	340.49	FALSE			0.1565		0.50899		TRUE	TRUE	TRUE	TRUE	TRUE																			3	3	10	3	3	10
5	2	forte-2011	im-10,1	imidazolium	ntf2	NTf2 derivatives	1,2-butanediol	alcohols	503.524	90.122	316.69	FALSE			0.0978		0.377201		TRUE	TRUE	TRUE	TRUE	TRUE																			3	3	10	3	3	10
5	2	forte-2011	im-10,1	imidazolium	ntf2	NTf2 derivatives	1,2-butanediol	alcohols	503.524	90.122	295.27	FALSE			0.0731		0.305859		TRUE	TRUE	TRUE	TRUE	TRUE																			3	3	10	3	3	10
5	3	trindade-2010	im-10,1	imidazolium	ntf2	NTf2 derivatives	1,2-propanediol	alcohols	503.524	76.095	281.1	FALSE			0.029		0.165014		TRUE	TRUE	TRUE	TRUE	TRUE																			3	3	7	3	3	7
5	3	trindade-2010	im-10,1	imidazolium	ntf2	NTf2 derivatives	1,2-propanediol	alcohols	503.524	76.095	286.7	FALSE			0.0351		0.194008		TRUE	TRUE	TRUE	TRUE	TRUE																			3	3	7	3	3	7
5	3	trindade-2010	im-10,1	imidazolium	ntf2	NTf2 derivatives	1,2-propanediol	alcohols	503.524	76.095	293	FALSE			0.0452		0.23853		TRUE	TRUE	TRUE	TRUE	TRUE																			3	3	7	3	3	7
5	3	trindade-2010	im-10,1	imidazolium	ntf2	NTf2 derivatives	1,2-propanediol	alcohols	503.524	76.095	297.2	FALSE			0.0528		0.269463		TRUE	TRUE	TRUE	TRUE	TRUE																			3	3	7	3	3	7
5	3	trindade-2010	im-10,1	imidazolium	ntf2	NTf2 derivatives	1,2-propanediol	alcohols	503.524	76.095	298.8	FALSE			0.0579		0.289103		TRUE	TRUE	TRUE	TRUE	TRUE																			3	3	7	3	3	7
5	3	trindade-2010	im-10,1	imidazolium	ntf2	NTf2 derivatives	1,2-propanediol	alcohols	503.524	76.095	299.8	FALSE			0.0626		0.306465		TRUE	TRUE	TRUE	TRUE	TRUE																			3	3	7	3	3	7
5	3	trindade-2010	im-10,1	imidazolium	ntf2	NTf2 derivatives	1,2-propanediol	alcohols	503.524	76.095	300.9	FALSE			0.0687		0.328014		TRUE	TRUE	TRUE	TRUE	TRUE																			3	3	7	3	3	7
5	3	trindade-2010	im-10,1	imidazolium	ntf2	NTf2 derivatives	1,2-propanediol	alcohols	503.524	76.095	302.1	FALSE			0.0761		0.352765		TRUE	TRUE	TRUE	TRUE	TRUE																			3	3	7	3	3	7
5	3	trindade-2010	im-10,1	imidazolium	ntf2	NTf2 derivatives	1,2-propanediol	alcohols	503.524	76.095	303.2	FALSE			0.0899		0.395271		TRUE	TRUE	TRUE	TRUE	TRUE																			3	3	7	3	3	7
5	3	trindade-2010	im-10,1	imidazolium	ntf2	NTf2 derivatives	1,2-propanediol	alcohols	503.524	76.095	305	FALSE			0.118		0.469573		TRUE	TRUE	TRUE	TRUE	TRUE																			3	3	7	3	3	7
5	3	trindade-2010	im-10,1	imidazolium	ntf2	NTf2 derivatives	1,2-propanediol	alcohols	503.524	76.095	305.7	FALSE			0.1422		0.523112		TRUE	TRUE	TRUE	TRUE	TRUE																			3	3	7	3	3	7
5	3	trindade-2010	im-10,1	imidazolium	ntf2	NTf2 derivatives	1,2-propanediol	alcohols	503.524	76.095	306	FALSE		0.1901		0.608328			TRUE	TRUE	TRUE	TRUE	TRUE																			3	3	7	3	3	7
5	3	trindade-2010	im-10,1	imidazolium	ntf2	NTf2 derivatives	1,2-propanediol	alcohols	503.524	76.095	305.8	FALSE		0.2064		0.632483			TRUE	TRUE	TRUE	TRUE	TRUE																			3	3	7	3	3	7
5	3	trindade-2010	im-10,1	imidazolium	ntf2	NTf2 derivatives	1,2-propanediol	alcohols	503.524	76.095	305.4	FALSE		0.2217		0.653365			TRUE	TRUE	TRUE	TRUE	TRUE																			3	3	7	3	3	7
5	3	trindade-2010	im-10,1	imidazolium	ntf2	NTf2 derivatives	1,2-propanediol	alcohols	503.524	76.095	304.9	FALSE		0.2302		0.664289			TRUE	TRUE	TRUE	TRUE	TRUE																			3	3	7	3	3	7
5	3	trindade-2010	im-10,1	imidazolium	ntf2	NTf2 derivatives	1,2-propanediol	alcohols	503.524	76.095	304.4	FALSE		0.2413		0.677888			TRUE	TRUE	TRUE	TRUE	TRUE																			3	3	7	3	3	7
5	3	trindade-2010	im-10,1	imidazolium	ntf2	NTf2 derivatives	1,2-propanediol	alcohols	503.524	76.095	302.8	FALSE		0.2641		0.70368			TRUE	TRUE	TRUE	TRUE	TRUE																			3	3	7	3	3	7
5	3	trindade-2010	im-10,1	imidazolium	ntf2	NTf2 derivatives	1,2-propanediol	alcohols	503.524	76.095	301.4	FALSE		0.2835		0.723619			TRUE	TRUE	TRUE	TRUE	TRUE																			3	3	7	3	3	7
5	3	trindade-2010	im-10,1	imidazolium	ntf2	NTf2 derivatives	1,2-propanediol	alcohols	503.524	76.095	299.7	FALSE		0.3022		0.741313			TRUE	TRUE	TRUE	TRUE	TRUE																			3	3	7	3	3	7
5	3	trindade-2010	im-10,1	imidazolium	ntf2	NTf2 derivatives	1,2-propanediol	alcohols	503.524	76.095	297.5	FALSE		0.3361		0.770109			TRUE	TRUE	TRUE	TRUE	TRUE																			3	3	7	3	3	7
5	3	trindade-2010	im-10,1	imidazolium	ntf2	NTf2 derivatives	1,2-propanediol	alcohols	503.524	76.095	293	FALSE		0.3912		0.809595			TRUE	TRUE	TRUE	TRUE	TRUE																			3	3	7	3	3	7
5	3	trindade-2010	im-10,1	imidazolium	ntf2	NTf2 derivatives	1,2-propanediol	alcohols	503.524	76.095	288.4	FALSE		0.4512		0.844727			TRUE	TRUE	TRUE	TRUE	TRUE																			3	3	7	3	3	7
5	3	trindade-2010	im-10,1	imidazolium	ntf2	NTf2 derivatives	1,2-propanediol	alcohols	503.524	76.095	284	FALSE		0.5015		0.869398			TRUE	TRUE	TRUE	TRUE	TRUE																			3	3	7	3	3	7
5	4	trindade-2010	im-10,1	imidazolium	ntf2	NTf2 derivatives	1,3-propanediol	alcohols	503.524	76.095	297.5	FALSE			0.0064		0.0408795		TRUE	TRUE	TRUE	TRUE	TRUE																			3	3	10	3	3	10
5	4	trindade-2010	im-10,1	imidazolium	ntf2	NTf2 derivatives	1,3-propanediol	alcohols	503.524	76.095	317.5	FALSE			0.0094		0.0590807		TRUE	TRUE	TRUE	TRUE	TRUE																			3	3	10	3	3	10
5	4	trindade-2010	im-10,1	imidazolium	ntf2	NTf2 derivatives	1,3-propanediol	alcohols	503.524	76.095	322.95	FALSE			0.0107		0.0667882		TRUE	TRUE	TRUE	TRUE	TRUE																			3	3	10	3	3	10
5	4	trindade-2010	im-10,1	imidazolium	ntf2	NTf2 derivatives	1,3-propanediol	alcohols	503.524	76.095	332.08	FALSE			0.0124		0.0767085		TRUE	TRUE	TRUE	TRUE	TRUE																			3	3	10	3	3	10
5	4	trindade-2010	im-10,1	imidazolium	ntf2	NTf2 derivatives	1,3-propanediol	alcohols	503.524	76.095	353.96	FALSE			0.0256		0.1481		TRUE	TRUE	TRUE	TRUE	TRUE																			3	3	10	3	3	10
5	4	trindade-2010	im-10,1	imidazolium	ntf2	NTf2 derivatives	1,3-propanediol	alcohols	503.524	76.095	360.4	FALSE			0.0316		0.177579		TRUE	TRUE	TRUE	TRUE	TRUE																			3	3	10	3	3	10
5	4	trindade-2010	im-10,1	imidazolium	ntf2	NTf2 derivatives	1,3-propanediol	alcohols	503.524	76.095	376.09	FALSE			0.1036		0.433349		TRUE	TRUE	TRUE	TRUE	TRUE																			3	3	10	3	3	10
5	4	trindade-2010	im-10,1	imidazolium	ntf2	NTf2 derivatives	1,3-propanediol	alcohols	503.524	76.095	377.06	FALSE		0.2014		0.625294			TRUE	TRUE	TRUE	TRUE	TRUE																			3	3	10	3	3	10
5	4	trindade-2010	im-10,1	imidazolium	ntf2	NTf2 derivatives	1,3-propanediol	alcohols	503.524	76.095	371.86	FALSE		0.2849		0.724993			TRUE	TRUE	TRUE	TRUE	TRUE																			3	3	10	3	3	10
5	4	trindade-2010	im-10,1	imidazolium	ntf2	NTf2 derivatives	1,3-propanediol	alcohols	503.524	76.095	367.86	FALSE		0.3563		0.78553			TRUE	TRUE	TRUE	TRUE	TRUE																			3	3	10	3	3	10
5	4	trindade-2010	im-10,1	imidazolium	ntf2	NTf2 derivatives	1,3-propanediol	alcohols	503.524	76.095	356.85	FALSE		0.4619		0.8503			TRUE	TRUE	TRUE	TRUE	TRUE																			3	3	10	3	3	10
5	4	trindade-2010	im-10,1	imidazolium	ntf2	NTf2 derivatives	1,3-propanediol	alcohols	503.524	76.095	356.37	FALSE		0.4649		0.851829			TRUE	TRUE	TRUE	TRUE	TRUE																			3	3	10	3	3	10
5	4	trindade-2010	im-10,1	imidazolium	ntf2	NTf2 derivatives	1,3-propanediol	alcohols	503.524	76.095	348.8	FALSE		0.5224		0.878607			TRUE	TRUE	TRUE	TRUE	TRUE																			3	3	10	3	3	10
5	4	trindade-2010	im-10,1	imidazolium	ntf2	NTf2 derivatives	1,3-propanediol	alcohols	503.524	76.095	341.65	FALSE		0.5809		0.901688			TRUE	TRUE	TRUE	TRUE	TRUE																			3	3	10	3	3	10
5	4	trindade-2010	im-10,1	imidazolium	ntf2	NTf2 derivatives	1,3-propanediol	alcohols	503.524	76.095	335.17	FALSE		0.6241		0.91657			TRUE	TRUE	TRUE	TRUE	TRUE																			3	3	10	3	3	10
5	4	trindade-2010	im-10,1	imidazolium	ntf2	NTf2 derivatives	1,3-propanediol	alcohols	503.524	76.095	331.1	FALSE		0.6523		0.92545			TRUE	TRUE	TRUE	TRUE	TRUE																			3	3	10	3	3	10
5	4	trindade-2010	im-10,1	imidazolium	ntf2	NTf2 derivatives	1,3-propanediol	alcohols	503.524	76.095	321.55	FALSE		0.7125		0.942525			TRUE	TRUE	TRUE	TRUE	TRUE																			3	3	10	3	3	10
5	4	trindade-2010	im-10,1	imidazolium	ntf2	NTf2 derivatives	1,3-propanediol	alcohols	503.524	76.095	306.68	FALSE		0.7839		0.960005			TRUE	TRUE	TRUE	TRUE	TRUE																			3	3	10	3	3	10
5	4	trindade-2010	im-10,1	imidazolium	ntf2	NTf2 derivatives	1,3-propanediol	alcohols	503.524	76.095	283.65	FALSE		0.8712		0.978146			TRUE	TRUE	TRUE	TRUE	TRUE																			3	3	10	3	3	10
5	5	trindade-2010	im-10,1	imidazolium	ntf2	NTf2 derivatives	glycerol	alcohols	503.524	92.094	308.5	FALSE			0.0055		0.0293501		TRUE	TRUE	TRUE	TRUE	TRUE														0.685795	0.158511	0.922682	0.507368		3	3	10	3	3	10
5	5	trindade-2010	im-10,1	imidazolium	ntf2	NTf2 derivatives	glycerol	alcohols	503.524	92.094	342	FALSE			0.0069		0.0365976		TRUE	TRUE	TRUE	TRUE	TRUE																			3	3	10	3	3	10
5	5	trindade-2010	im-10,1	imidazolium	ntf2	NTf2 derivatives	glycerol	alcohols	503.524	92.094	358.6	FALSE			0.0159		0.0811677		TRUE	TRUE	TRUE	TRUE	TRUE																			3	3	10	3	3	10
5	5	trindade-2010	im-10,1	imidazolium	ntf2	NTf2 derivatives	glycerol	alcohols	503.524	92.094	368.4	FALSE			0.0202		0.101302		TRUE	TRUE	TRUE	TRUE	TRUE																			3	3	10	3	3	10
5	5	trindade-2010	im-10,1	imidazolium	ntf2	NTf2 derivatives	glycerol	alcohols	503.524	92.094	384.3	FALSE		0.0325		0.155165			TRUE	TRUE	TRUE	TRUE	TRUE																			3	3	10	3	3	10
5	5	trindade-2010	im-10,1	imidazolium	ntf2	NTf2 derivatives	glycerol	alcohols	503.524	92.094	383.7	FALSE		0.9212		0.984596			TRUE	TRUE	TRUE	TRUE	TRUE																			3	3	10	3	3	10
5	5	trindade-2010	im-10,1	imidazolium	ntf2	NTf2 derivatives	glycerol	alcohols	503.524	92.094	363.5	FALSE		0.9415		0.988763			TRUE	TRUE	TRUE	TRUE	TRUE																			3	3	10	3	3	10
5	5	trindade-2010	im-10,1	imidazolium	ntf2	NTf2 derivatives	glycerol	alcohols	503.524	92.094	338.8	FALSE		0.9582		0.992084			TRUE	TRUE	TRUE	TRUE	TRUE																			3	3	10	3	3	10
5	5	trindade-2010	im-10,1	imidazolium	ntf2	NTf2 derivatives	glycerol	alcohols	503.524	92.094	343.3	FALSE		0.9564		0.991731			TRUE	TRUE	TRUE	TRUE	TRUE																			3	3	10	3	3	10
5	5	trindade-2010	im-10,1	imidazolium	ntf2	NTf2 derivatives	glycerol	alcohols	503.524	92.094	303.4	FALSE		0.9731		0.994969			TRUE	TRUE	TRUE	TRUE	TRUE														0.722812	0.136424	0.934458	0.463442		3	3	10	3	3	10
5	6	vale-2010a	im-10,1	imidazolium	ntf2	NTf2 derivatives	1-nonanol	alcohols	503.524	144.258	289.4	FALSE			0.025		0.0821465		TRUE	TRUE	TRUE	TRUE	TRUE		0.543212	0.103713	0.805856	0.287695	0.633529	0.0787375	0.857834	0.229772	0.896644	3.2702e-07	0.968031	1.14144e-06	0.906424	2.5407e-07	0.971273	8.86816e-07		3	3	7	3	3	7
5	6	vale-2010a	im-10,1	imidazolium	ntf2	NTf2 derivatives	1-nonanol	alcohols	503.524	144.258	294.26	FALSE			0.049		0.15243		TRUE	TRUE	TRUE	TRUE	TRUE		0.482803	0.128291	0.765166	0.339365	0.585468	0.0948374	0.831359	0.267779	0.886424	4.2077e-07	0.964591	1.46867e-06	0.897192	3.2473e-07	0.968214	1.13345e-06		3	3	7	3	3	7
5	6	vale-2010a	im-10,1	imidazolium	ntf2	NTf2 derivatives	1-nonanol	alcohols	503.524	144.258	296.41	FALSE			0.1		0.279449		TRUE	TRUE	TRUE	TRUE	TRUE		0.451655	0.142884	0.741934	0.367837	0.56211	0.103613	0.817538	0.287475	0.881698	4.6953e-07	0.962982	1.63886e-06	0.892906	3.6137e-07	0.966779	1.26134e-06		3	3	7	3	3	7
5	6	vale-2010a	im-10,1	imidazolium	ntf2	NTf2 derivatives	1-nonanol	alcohols	503.524	144.258	296.5	FALSE		0.15		0.381173			TRUE	TRUE	TRUE	TRUE	TRUE		0.450267	0.143569	0.740859	0.369135	0.5611	0.104009	0.816926	0.288347	0.881498	4.7168e-07	0.962914	1.64637e-06	0.892724	3.6298e-07	0.966718	1.26696e-06		3	3	7	3	3	7
5	6	vale-2010a	im-10,1	imidazolium	ntf2	NTf2 derivatives	1-nonanol	alcohols	503.524	144.258	296.39	FALSE		0.181		0.435472			TRUE	TRUE	TRUE	TRUE	TRUE		0.451962	0.142733	0.74217	0.367549	0.562334	0.103526	0.817674	0.287282	0.881743	4.6905e-07	0.962998	1.63719e-06	0.892946	3.6101e-07	0.966793	1.26008e-06		3	3	7	3	3	7
5	6	vale-2010a	im-10,1	imidazolium	ntf2	NTf2 derivatives	1-nonanol	alcohols	503.524	144.258	295.23	FALSE		0.248		0.535122			TRUE	TRUE	TRUE	TRUE	TRUE		0.46919	0.134491	0.755217	0.35165	0.575107	0.0986438	0.82531	0.276406	0.884307	4.4217e-07	0.963872	1.54337e-06	0.895273	3.4081e-07	0.967573	1.18958e-06		3	3	7	3	3	7
5	6	vale-2010a	im-10,1	imidazolium	ntf2	NTf2 derivatives	1-nonanol	alcohols	503.524	144.258	292.09	FALSE		0.319		0.620497			TRUE	TRUE	TRUE	TRUE	TRUE		0.511175	0.116188	0.784948	0.314534	0.607677	0.0870992	0.843906	0.249824	0.891067	3.7625e-07	0.966161	1.31328e-06	0.901392	2.9121e-07	0.969611	1.01645e-06		3	3	7	3	3	7
5	6	vale-2010a	im-10,1	imidazolium	ntf2	NTf2 derivatives	1-nonanol	alcohols	503.524	144.258	288.85	FALSE		0.373		0.67495			TRUE	TRUE	TRUE	TRUE	TRUE		0.549408	0.101432	0.809738	0.282643	0.638604	0.0771698	0.860487	0.225935	0.89776	3.1771e-07	0.968404	1.10895e-06	0.907429	2.4703e-07	0.971603	8.62243e-07		3	3	7	3	3	7
5	6	vale-2010a	im-10,1	imidazolium	ntf2	NTf2 derivatives	1-nonanol	alcohols	503.524	144.258	286.95	FALSE		0.398		0.697669			TRUE	TRUE	TRUE	TRUE	TRUE		0.570025	0.0941278	0.822296	0.266155	0.655623	0.0720745	0.869197	0.213287	0.901551	2.8735e-07	0.969664	1.00298e-06	0.91084	2.2407e-07	0.972721	7.82103e-07		3	3	7	3	3	7
5	6	vale-2010a	im-10,1	imidazolium	ntf2	NTf2 derivatives	1-nonanol	alcohols	503.524	144.258	282.55	FALSE		0.448		0.739096			TRUE	TRUE	TRUE	TRUE	TRUE		0.613727	0.0799571	0.84723	0.23274	0.69222	0.0618887	0.887009	0.18717	0.909954	2.2692e-07	0.972431	7.9205e-07	0.918375	1.7821e-07	0.975169	6.22031e-07		3	3	7	3	3	7
5	7	vale-2010a	im-10,1	imidazolium	ntf2	NTf2 derivatives	1-decanol	alcohols	503.524	158.285	298.55	FALSE			0.025		0.0754158		TRUE	TRUE	TRUE	TRUE	TRUE		0.568914	0.113453	0.807626	0.289316	0.649001	0.0881672	0.854692	0.235234	0.919532	2.9493e-07	0.973227	9.38208e-07	0.923188	2.3305e-07	0.974511	7.4136e-07		3	3	6	3	3	6
5	7	vale-2010a	im-10,1	imidazolium	ntf2	NTf2 derivatives	1-decanol	alcohols	503.524	158.285	303.05	FALSE			0.048		0.138223		TRUE	TRUE	TRUE	TRUE	TRUE		0.514824	0.137143	0.771455	0.335817	0.605664	0.104601	0.830103	0.270935	0.911914	3.7215e-07	0.97053	1.18385e-06	0.915934	2.9315e-07	0.971957	9.32546e-07		3	3	6	3	3	6
5	7	vale-2010a	im-10,1	imidazolium	ntf2	NTf2 derivatives	1-decanol	alcohols	503.524	158.285	306.88	FALSE			0.087		0.232617		TRUE	TRUE	TRUE	TRUE	TRUE		0.458824	0.165805	0.729514	0.38736	0.564074	0.12268	0.804545	0.307878	0.90506	4.517e-07	0.968077	1.43691e-06	0.909394	3.5498e-07	0.969631	1.12923e-06		3	3	6	3	3	6
5	7	vale-2010a	im-10,1	imidazolium	ntf2	NTf2 derivatives	1-decanol	alcohols	503.524	158.285	307.94	FALSE		0.139		0.339306			TRUE	TRUE	TRUE	TRUE	TRUE		0.440605	0.176205	0.714742	0.404911	0.551629	0.128644	0.796488	0.319565	0.903103	4.7627e-07	0.967372	1.51507e-06	0.907524	3.7405e-07	0.968962	1.1899e-06		3	3	6	3	3	6
5	7	vale-2010a	im-10,1	imidazolium	ntf2	NTf2 derivatives	1-decanol	alcohols	503.524	158.285	307.8	FALSE		0.173		0.399565			TRUE	TRUE	TRUE	TRUE	TRUE		0.443109	0.174742	0.716807	0.402478	0.5533	0.127827	0.797581	0.317978	0.903363	4.7296e-07	0.967466	1.50454e-06	0.907773	3.7148e-07	0.969051	1.18172e-06		3	3	6	3	3	6
5	7	vale-2010a	im-10,1	imidazolium	ntf2	NTf2 derivatives	1-decanol	alcohols	503.524	158.285	306.99	FALSE		0.218		0.470005			TRUE	TRUE	TRUE	TRUE	TRUE		0.457006	0.166817	0.728066	0.389094	0.562804	0.123276	0.803732	0.309057	0.904859	4.542e-07	0.968005	1.44486e-06	0.909201	3.5691e-07	0.969562	1.13537e-06		3	3	6	3	3	6
5	7	vale-2010a	im-10,1	imidazolium	ntf2	NTf2 derivatives	1-decanol	alcohols	503.524	158.285	305.08	FALSE		0.268		0.538037			TRUE	TRUE	TRUE	TRUE	TRUE		0.486692	0.150955	0.751007	0.361261	0.584234	0.113591	0.817188	0.289598	0.908324	4.1259e-07	0.969248	1.3125e-06	0.91251	3.2459e-07	0.970742	1.03256e-06		3	3	6	3	3	6
5	7	vale-2010a	im-10,1	imidazolium	ntf2	NTf2 derivatives	1-decanol	alcohols	503.524	158.285	301.75	FALSE		0.35		0.631392			TRUE	TRUE	TRUE	TRUE	TRUE		0.531459	0.129479	0.783	0.321183	0.618739	0.0994146	0.83773	0.259896	0.914163	3.4816e-07	0.971329	1.10754e-06	0.918077	2.7449e-07	0.972714	8.73186e-07		3	3	6	3	3	6
5	7	vale-2010a	im-10,1	imidazolium	ntf2	NTf2 derivatives	1-decanol	alcohols	503.524	158.285	297.05	FALSE		0.42		0.697297			TRUE	TRUE	TRUE	TRUE	TRUE		0.585075	0.107019	0.817705	0.276014	0.662334	0.0835133	0.861874	0.224731	0.921967	2.7259e-07	0.974083	8.67142e-07	0.925504	2.1564e-07	0.975321	6.85977e-07		3	3	6	3	3	6
5	8	vale-2010a	im-10,1	imidazolium	ntf2	NTf2 derivatives	1-undecanol	alcohols	503.524	172.312	304.34	FALSE			0.025		0.0697045		TRUE	TRUE	TRUE	TRUE	TRUE		0.72191	0.0774622	0.883529	0.197022	0.692022	0.0871389	0.867831	0.218103	0.939062	2.1816e-07	0.978275	6.37499e-07	0.936801	1.8808e-07	0.977434	5.496e-07		3	3	4	3	3	4
5	8	vale-2010a	im-10,1	imidazolium	ntf2	NTf2 derivatives	1-undecanol	alcohols	503.524	172.312	310.55	FALSE			0.051		0.135725		TRUE	TRUE	TRUE	TRUE	TRUE		0.671634	0.0954548	0.856671	0.23569	0.63718	0.108853	0.836918	0.263049	0.930881	2.9773e-07	0.97522	8.70016e-07	0.928202	2.581e-07	0.974212	7.5421e-07		3	3	4	3	3	4
5	8	vale-2010a	im-10,1	imidazolium	ntf2	NTf2 derivatives	1-undecanol	alcohols	503.524	172.312	313.42	FALSE			0.101		0.247156		TRUE	TRUE	TRUE	TRUE	TRUE		0.645282	0.105703	0.841668	0.256721	0.608331	0.121638	0.81945	0.288089	0.926841	3.4274e-07	0.973698	1.00154e-06	0.923967	2.9778e-07	0.972611	8.70162e-07		3	3	4	3	3	4
5	8	vale-2010a	im-10,1	imidazolium	ntf2	NTf2 derivatives	1-undecanol	alcohols	503.524	172.312	313.82	FALSE			0.144		0.32957		TRUE	TRUE	TRUE	TRUE	TRUE		0.641408	0.107247	0.839405	0.259829	0.604095	0.123603	0.81681	0.29185	0.926264	3.4948e-07	0.97348	1.02124e-06	0.923364	3.0373e-07	0.972382	8.87548e-07		3	3	4	3	3	4
5	8	vale-2010a	im-10,1	imidazolium	ntf2	NTf2 derivatives	1-undecanol	alcohols	503.524	172.312	313.98	FALSE		0.194		0.412922			TRUE	TRUE	TRUE	TRUE	TRUE		0.639853	0.107876	0.838492	0.261093	0.602385	0.124404	0.815738	0.293375	0.926033	3.5221e-07	0.973393	1.02921e-06	0.923122	3.0614e-07	0.97229	8.94591e-07		3	3	4	3	3	4
5	8	vale-2010a	im-10,1	imidazolium	ntf2	NTf2 derivatives	1-undecanol	alcohols	503.524	172.312	313.62	FALSE		0.262		0.50918			TRUE	TRUE	TRUE	TRUE	TRUE		0.643342	0.106467	0.840536	0.258262	0.606219	0.122614	0.818136	0.28996	0.926553	3.461e-07	0.97359	1.01136e-06	0.923666	3.0074e-07	0.972497	8.78811e-07		3	3	4	3	3	4
5	8	vale-2010a	im-10,1	imidazolium	ntf2	NTf2 derivatives	1-undecanol	alcohols	503.524	172.312	311.5	FALSE		0.32		0.578972			TRUE	TRUE	TRUE	TRUE	TRUE		0.663155	0.0986866	0.851916	0.242398	0.627904	0.112845	0.831397	0.270975	0.929562	3.12e-07	0.974724	9.11715e-07	0.926818	2.7068e-07	0.97369	7.90971e-07		3	3	4	3	3	4
5	8	vale-2010a	im-10,1	imidazolium	ntf2	NTf2 derivatives	1-undecanol	alcohols	503.524	172.312	309.27	FALSE		0.368		0.629837			TRUE	TRUE	TRUE	TRUE	TRUE		0.68269	0.0913212	0.86277	0.227008	0.649289	0.103804	0.843993	0.252875	0.932629	2.7944e-07	0.975876	8.16569e-07	0.930037	2.42e-07	0.974903	7.07163e-07		3	3	4	3	3	4
5	8	vale-2010a	im-10,1	imidazolium	ntf2	NTf2 derivatives	1-undecanol	alcohols	503.524	172.312	306.74	FALSE		0.409		0.669124			TRUE	TRUE	TRUE	TRUE	TRUE		0.703459	0.0838384	0.873929	0.210989	0.671933	0.0947506	0.856837	0.234219	0.93599	2.4628e-07	0.977132	7.1967e-07	0.933568	2.128e-07	0.976227	6.21836e-07		3	3	4	3	3	4
5	8	vale-2010a	im-10,1	imidazolium	ntf2	NTf2 derivatives	1-undecanol	alcohols	503.524	172.312	302.85	FALSE		0.462		0.715048			TRUE	TRUE	TRUE	TRUE	TRUE		0.732809	0.0738145	0.889067	0.188897	0.703862	0.0828153	0.874141	0.208767	0.940913	2.0222e-07	0.978962	5.9092e-07	0.93875	1.7407e-07	0.97816	5.08661e-07		3	3	4	3	3	4
5	9	vale-2010a	im-10,1	imidazolium	ntf2	NTf2 derivatives	1-dodecanol	alcohols	503.524	186.339	313.16	FALSE			0.017		0.0446454		TRUE	TRUE	TRUE	TRUE	TRUE		0.657835	0.121037	0.838583	0.271193	0.707345	0.0975165	0.867219	0.225995	0.934357	3.8335e-07	0.97466	1.03589e-06	0.942011	2.3192e-07	0.977726	6.26692e-07		3	3	5	3	3	5
5	9	vale-2010a	im-10,1	imidazolium	ntf2	NTf2 derivatives	1-dodecanol	alcohols	503.524	186.339	322.93	FALSE			0.051		0.126804		TRUE	TRUE	TRUE	TRUE	TRUE		0.551575	0.175551	0.768721	0.365233	0.619124	0.137927	0.814557	0.301839	0.920669	6.1521e-07	0.969098	1.66241e-06	0.929712	3.7349e-07	0.972783	1.00924e-06		3	3	5	3	3	5
5	9	vale-2010a	im-10,1	imidazolium	ntf2	NTf2 derivatives	1-dodecanol	alcohols	503.524	186.339	325.26	FALSE			0.085		0.200654		TRUE	TRUE	TRUE	TRUE	TRUE		0.518078	0.195624	0.743913	0.396563	0.593488	0.151372	0.797778	0.325235	0.917156	6.8634e-07	0.967654	1.85462e-06	0.926541	4.1701e-07	0.971496	1.12684e-06		3	3	5	3	3	5
5	9	vale-2010a	im-10,1	imidazolium	ntf2	NTf2 derivatives	1-dodecanol	alcohols	503.524	186.339	325.35	FALSE			0.133		0.293048		TRUE	TRUE	TRUE	TRUE	TRUE		0.516676	0.196499	0.742842	0.397892	0.59245	0.151936	0.797083	0.326197	0.917018	6.8923e-07	0.967597	1.86243e-06	0.926417	4.1878e-07	0.971445	1.13162e-06		3	3	5	3	3	5
5	9	vale-2010a	im-10,1	imidazolium	ntf2	NTf2 derivatives	1-dodecanol	alcohols	503.524	186.339	325.54	FALSE		0.192		0.391026			TRUE	TRUE	TRUE	TRUE	TRUE		0.513686	0.198377	0.740548	0.400735	0.590245	0.153137	0.795604	0.328243	0.916727	6.9536e-07	0.967477	1.87899e-06	0.926154	4.2253e-07	0.971338	1.14176e-06		3	3	5	3	3	5
5	9	vale-2010a	im-10,1	imidazolium	ntf2	NTf2 derivatives	1-dodecanol	alcohols	503.524	186.339	324.27	FALSE		0.249		0.472555			TRUE	TRUE	TRUE	TRUE	TRUE		0.532922	0.186533	0.75509	0.382576	0.604661	0.145401	0.80518	0.314952	0.91866	6.5527e-07	0.968273	1.77066e-06	0.927899	3.9799e-07	0.972048	1.07545e-06		3	3	5	3	3	5
5	9	vale-2010a	im-10,1	imidazolium	ntf2	NTf2 derivatives	1-dodecanol	alcohols	503.524	186.339	319.53	FALSE		0.367		0.610391			TRUE	TRUE	TRUE	TRUE	TRUE		0.593412	0.152559	0.797728	0.32726	0.652903	0.121475	0.835606	0.272005	0.925623	5.2322e-07	0.971122	1.41384e-06	0.934174	3.1726e-07	0.974586	8.57297e-07		3	3	5	3	3	5
5	9	vale-2010a	im-10,1	imidazolium	ntf2	NTf2 derivatives	1-dodecanol	alcohols	503.524	186.339	317.34	FALSE		0.435		0.675372			TRUE	TRUE	TRUE	TRUE	TRUE		0.617253	0.140383	0.813357	0.306178	0.672781	0.112388	0.847465	0.254926	0.928707	4.7069e-07	0.972376	1.27189e-06	0.936945	2.8518e-07	0.9757	7.70611e-07		3	3	5	3	3	5
5	9	vale-2010a	im-10,1	imidazolium	ntf2	NTf2 derivatives	1-dodecanol	alcohols	503.524	186.339	308.45	FALSE		0.513		0.740021			TRUE	TRUE	TRUE	TRUE	TRUE		0.697605	0.103591	0.86176	0.237963	0.741834	0.083728	0.885906	0.198026	0.940356	3.0257e-07	0.977066	8.17602e-07	0.947371	1.8274e-07	0.979856	4.93799e-07		3	3	5	3	3	5
5	10	vale-2010a	im-10,1	imidazolium	ntf2	NTf2 derivatives	1-tetradecanol	alcohols	503.524	214.393	332.01	FALSE			0.025		0.0568001		TRUE	TRUE	TRUE	TRUE	TRUE		0.73586	0.116928	0.867425	0.237212	0.724881	0.122098	0.860881	0.246217	0.952244	2.81e-07	0.979093	6.59957e-07	0.955044	2.2952e-07	0.980351	5.39051e-07		3	3	4	3	3	4
5	10	vale-2010a	im-10,1	imidazolium	ntf2	NTf2 derivatives	1-tetradecanol	alcohols	503.524	214.393	337.45	FALSE			0.045		0.0996402		TRUE	TRUE	TRUE	TRUE	TRUE		0.693888	0.139354	0.841867	0.27551	0.681414	0.1464	0.83398	0.287143	0.946904	3.6357e-07	0.976682	8.53881e-07	0.949921	2.9706e-07	0.978046	6.97676e-07		3	3	4	3	3	4
5	10	vale-2010a	im-10,1	imidazolium	ntf2	NTf2 derivatives	1-tetradecanol	alcohols	503.524	214.393	340.14	FALSE			0.091		0.190361		TRUE	TRUE	TRUE	TRUE	TRUE		0.670284	0.152687	0.826825	0.297369	0.656945	0.161055	0.8181	0.310758	0.944123	4.1189e-07	0.97542	9.67365e-07	0.94725	3.3657e-07	0.976838	7.90469e-07		3	3	4	3	3	4
5	10	vale-2010a	im-10,1	imidazolium	ntf2	NTf2 derivatives	1-tetradecanol	alcohols	503.524	214.393	340.21	FALSE		0.127		0.254657			TRUE	TRUE	TRUE	TRUE	TRUE		0.669639	0.153058	0.826407	0.297968	0.656277	0.161466	0.817659	0.311409	0.94405	4.1322e-07	0.975386	9.70489e-07	0.94718	3.3766e-07	0.976806	7.93029e-07		3	3	4	3	3	4
5	10	vale-2010a	im-10,1	imidazolium	ntf2	NTf2 derivatives	1-tetradecanol	alcohols	503.524	214.393	340.02	FALSE		0.202		0.372847			TRUE	TRUE	TRUE	TRUE	TRUE		0.671384	0.152053	0.827537	0.296344	0.658086	0.160353	0.818853	0.309645	0.944249	4.0962e-07	0.975477	9.62034e-07	0.947371	3.3472e-07	0.976893	7.86124e-07		3	3	4	3	3	4
5	10	vale-2010a	im-10,1	imidazolium	ntf2	NTf2 derivatives	1-tetradecanol	alcohols	503.524	214.393	339.2	FALSE		0.257		0.448236			TRUE	TRUE	TRUE	TRUE	TRUE		0.678781	0.147825	0.832297	0.289474	0.665755	0.155689	0.823881	0.302201	0.945106	3.9439e-07	0.975866	9.26265e-07	0.948194	3.2227e-07	0.977265	7.56884e-07		3	3	4	3	3	4
5	10	vale-2010a	im-10,1	imidazolium	ntf2	NTf2 derivatives	1-tetradecanol	alcohols	503.524	214.393	337.89	FALSE		0.304		0.506374			TRUE	TRUE	TRUE	TRUE	TRUE		0.690173	0.141418	0.839532	0.278937	0.677564	0.148656	0.831517	0.29083	0.946456	3.7111e-07	0.976479	8.7159e-07	0.94949	3.0323e-07	0.977851	7.12167e-07		3	3	4	3	3	4
5	10	vale-2010a	im-10,1	imidazolium	ntf2	NTf2 derivatives	1-tetradecanol	alcohols	503.524	214.393	336.76	FALSE		0.333		0.539709			TRUE	TRUE	TRUE	TRUE	TRUE		0.69961	0.136203	0.845438	0.270246	0.687341	0.142961	0.837744	0.281488	0.947603	3.5202e-07	0.976998	8.26755e-07	0.950591	2.8762e-07	0.978348	6.75505e-07		3	3	4	3	3	4
5	10	vale-2010a	im-10,1	imidazolium	ntf2	NTf2 derivatives	1-tetradecanol	alcohols	503.524	214.393	333.74	FALSE		0.395		0.605271			TRUE	TRUE	TRUE	TRUE	TRUE		0.723249	0.123501	0.8599	0.248643	0.711824	0.129183	0.852969	0.258384	0.950587	3.0523e-07	0.978346	7.16864e-07	0.953455	2.4934e-07	0.979637	5.856e-07		3	3	4	3	3	4
5	10	vale-2010a	im-10,1	imidazolium	ntf2	NTf2 derivatives	1-tetradecanol	alcohols	503.524	214.393	327.75	FALSE		0.484		0.687788			TRUE	TRUE	TRUE	TRUE	TRUE		0.764416	0.102544	0.884	0.211576	0.75445	0.106686	0.878287	0.219047	0.956164	2.2851e-07	0.980853	5.36679e-07	0.958799	1.8656e-07	0.982032	4.38155e-07		3	3	4	3	3	4
5	11	vale-2010a	im-10,1	imidazolium	ntf2	NTf2 derivatives	1-hexadecanol	alcohols	503.524	242.447	346.55	FALSE			0.033		0.0661839		TRUE	TRUE	TRUE	TRUE	TRUE		0.763315	0.138798	0.870094	0.250779	0.756926	0.143038	0.866082	0.257418	0.963507	3.5064e-07	0.98209	7.28223e-07	0.966618	2.532e-07	0.983643	5.25856e-07		3	3	4	3	3	4
5	11	vale-2010a	im-10,1	imidazolium	ntf2	NTf2 derivatives	1-hexadecanol	alcohols	503.524	242.447	349.84	FALSE			0.055		0.107839		TRUE	TRUE	TRUE	TRUE	TRUE		0.741756	0.152862	0.856432	0.272598	0.734936	0.157832	0.852036	0.280174	0.961094	4.0696e-07	0.980881	8.45191e-07	0.964349	2.9423e-07	0.982511	6.11069e-07		3	3	4	3	3	4
5	11	vale-2010a	im-10,1	imidazolium	ntf2	NTf2 derivatives	1-hexadecanol	alcohols	503.524	242.447	352.68	FALSE			0.123		0.225574		TRUE	TRUE	TRUE	TRUE	TRUE		0.72134	0.166537	0.843165	0.293276	0.714116	0.172294	0.838391	0.301828	0.958928	4.6189e-07	0.979793	9.59272e-07	0.96231	3.3428e-07	0.981491	6.94246e-07		3	3	4	3	3	4
5	11	vale-2010a	im-10,1	imidazolium	ntf2	NTf2 derivatives	1-hexadecanol	alcohols	503.524	242.447	352.77	FALSE			0.146		0.262024		TRUE	TRUE	TRUE	TRUE	TRUE		0.720661	0.166996	0.842718	0.293962	0.713425	0.172782	0.837933	0.302549	0.958858	4.6373e-07	0.979758	9.63093e-07	0.962245	3.3562e-07	0.981458	6.97029e-07		3	3	4	3	3	4
5	11	vale-2010a	im-10,1	imidazolium	ntf2	NTf2 derivatives	1-hexadecanol	alcohols	503.524	242.447	352.79	FALSE		0.152		0.271277			TRUE	TRUE	TRUE	TRUE	TRUE		0.720511	0.167099	0.842619	0.294115	0.713272	0.172891	0.837831	0.30271	0.958842	4.6414e-07	0.97975	9.63945e-07	0.96223	3.3592e-07	0.98145	6.97652e-07		3	3	4	3	3	4
5	11	vale-2010a	im-10,1	imidazolium	ntf2	NTf2 derivatives	1-hexadecanol	alcohols	503.524	242.447	352.13	FALSE		0.249		0.407791			TRUE	TRUE	TRUE	TRUE	TRUE		0.725438	0.163763	0.845854	0.289124	0.718296	0.169354	0.841158	0.297472	0.959353	4.5076e-07	0.980007	9.36157e-07	0.962711	3.2617e-07	0.981691	6.77403e-07		3	3	4	3	3	4
5	11	vale-2010a	im-10,1	imidazolium	ntf2	NTf2 derivatives	1-hexadecanol	alcohols	503.524	242.447	351.15	FALSE		0.291		0.460164			TRUE	TRUE	TRUE	TRUE	TRUE		0.732565	0.158975	0.850499	0.281906	0.725563	0.164286	0.845936	0.289909	0.960105	4.3153e-07	0.980385	8.96219e-07	0.963418	3.1214e-07	0.982045	6.48265e-07		3	3	4	3	3	4
5	11	vale-2010a	im-10,1	imidazolium	ntf2	NTf2 derivatives	1-hexadecanol	alcohols	503.524	242.447	349.67	FALSE		0.335		0.511296			TRUE	TRUE	TRUE	TRUE	TRUE		0.742922	0.152092	0.85718	0.271418	0.736125	0.15702	0.852805	0.278941	0.961221	4.0386e-07	0.980945	8.38753e-07	0.964469	2.9197e-07	0.982571	6.06375e-07		3	3	4	3	3	4
5	11	vale-2010a	im-10,1	imidazolium	ntf2	NTf2 derivatives	1-hexadecanol	alcohols	503.524	242.447	348.27	FALSE		0.364		0.543094			TRUE	TRUE	TRUE	TRUE	TRUE		0.752303	0.145935	0.863159	0.261922	0.745692	0.150536	0.858952	0.269029	0.962259	3.7915e-07	0.981465	7.87434e-07	0.965444	2.7397e-07	0.983058	5.68992e-07		3	3	4	3	3	4
5	11	vale-2010a	im-10,1	imidazolium	ntf2	NTf2 derivatives	1-hexadecanol	alcohols	503.524	242.447	346.36	FALSE		0.404		0.584682			TRUE	TRUE	TRUE	TRUE	TRUE		0.764499	0.138037	0.870834	0.249582	0.758134	0.14224	0.866843	0.256172	0.963643	3.4761e-07	0.982158	7.21931e-07	0.966745	2.5099e-07	0.983707	5.21266e-07		3	3	4	3	3	4
5	12	vale-2010a	im-10,1	imidazolium	ntf2	NTf2 derivatives	1-octadecanol	alcohols	503.524	270.501	352.35	FALSE			0.025		0.0455552		TRUE	TRUE	TRUE	TRUE	TRUE		0.832067	0.128732	0.902182	0.215707	0.826025	0.134837	0.898354	0.224873	0.975714	2.8929e-07	0.986805	5.38499e-07	0.976461	2.3245e-07	0.987215	4.32694e-07		3	3	4	3	3	4
5	12	vale-2010a	im-10,1	imidazolium	ntf2	NTf2 derivatives	1-octadecanol	alcohols	503.524	270.501	359.85	FALSE			0.05		0.0892292		TRUE	TRUE	TRUE	TRUE	TRUE		0.797035	0.155944	0.879661	0.255904	0.790348	0.16354	0.87527	0.26683	0.971771	4.051e-07	0.984634	7.54073e-07	0.97263	3.2523e-07	0.985108	6.05399e-07		3	3	4	3	3	4
5	12	vale-2010a	im-10,1	imidazolium	ntf2	NTf2 derivatives	1-octadecanol	alcohols	503.524	270.501	363.01	FALSE			0.09		0.155476		TRUE	TRUE	TRUE	TRUE	TRUE		0.780116	0.169343	0.868493	0.275093	0.773156	0.177748	0.863842	0.286934	0.969991	4.6503e-07	0.983652	8.6563e-07	0.970902	3.732e-07	0.984155	6.94693e-07		3	3	4	3	3	4
5	12	vale-2010a	im-10,1	imidazolium	ntf2	NTf2 derivatives	1-octadecanol	alcohols	503.524	270.501	363.45	FALSE			0.139		0.231073		TRUE	TRUE	TRUE	TRUE	TRUE		0.777642	0.171316	0.866843	0.277886	0.770644	0.179845	0.862155	0.289865	0.969738	4.7396e-07	0.983512	8.82252e-07	0.970656	3.8034e-07	0.984019	7.07984e-07		3	3	4	3	3	4
5	12	vale-2010a	im-10,1	imidazolium	ntf2	NTf2 derivatives	1-octadecanol	alcohols	503.524	270.501	363.54	FALSE		0.197		0.313502			TRUE	TRUE	TRUE	TRUE	TRUE		0.777132	0.171723	0.866503	0.278461	0.770126	0.180279	0.861807	0.290469	0.969685	4.7581e-07	0.983483	8.85696e-07	0.970605	3.8182e-07	0.983991	7.10738e-07		3	3	4	3	3	4
5	12	vale-2010a	im-10,1	imidazolium	ntf2	NTf2 derivatives	1-octadecanol	alcohols	503.524	270.501	363	FALSE		0.255		0.389179			TRUE	TRUE	TRUE	TRUE	TRUE		0.780172	0.169299	0.86853	0.27503	0.773213	0.177701	0.86388	0.286868	0.969997	4.6483e-07	0.983655	8.65257e-07	0.970908	3.7303e-07	0.984158	6.94376e-07		3	3	4	3	3	4
5	12	vale-2010a	im-10,1	imidazolium	ntf2	NTf2 derivatives	1-octadecanol	alcohols	503.524	270.501	361.78	FALSE		0.312		0.457744			TRUE	TRUE	TRUE	TRUE	TRUE		0.786874	0.16397	0.872977	0.267445	0.780021	0.172044	0.868429	0.278914	0.970693	4.4083e-07	0.984039	8.20583e-07	0.971583	3.5384e-07	0.98453	6.58655e-07		3	3	4	3	3	4
5	12	vale-2010a	im-10,1	imidazolium	ntf2	NTf2 derivatives	1-octadecanol	alcohols	503.524	270.501	361.05	FALSE		0.33		0.478306			TRUE	TRUE	TRUE	TRUE	TRUE		0.790779	0.160879	0.875554	0.263016	0.783988	0.168765	0.871066	0.274273	0.971104	4.27e-07	0.984266	7.94839e-07	0.971982	3.4277e-07	0.984751	6.38049e-07		3	3	4	3	3	4
5	12	vale-2010a	im-10,1	imidazolium	ntf2	NTf2 derivatives	1-octadecanol	alcohols	503.524	270.501	360.9	FALSE		0.334		0.482809			TRUE	TRUE	TRUE	TRUE	TRUE		0.791572	0.160251	0.876076	0.262115	0.784795	0.168102	0.871601	0.273332	0.971188	4.2421e-07	0.984312	7.89645e-07	0.972064	3.4053e-07	0.984796	6.33879e-07		3	3	4	3	3	4
5	13	vale-2010a	im-10,1	imidazolium	ntf2	NTf2 derivatives	1-eicosanol	alcohols	503.524	298.555	361.6	FALSE			0.025		0.041452		TRUE	TRUE	TRUE	TRUE	TRUE		0.867616	0.133792	0.917034	0.206662	0.860639	0.142103	0.912399	0.218359	0.982846	2.7107e-07	0.989758	4.57169e-07	0.98289	2.4568e-07	0.989784	4.14348e-07		3	3	4	3	3	4
5	13	vale-2010a	im-10,1	imidazolium	ntf2	NTf2 derivatives	1-eicosanol	alcohols	503.524	298.555	370.05	FALSE			0.052		0.084677		TRUE	TRUE	TRUE	TRUE	TRUE		0.837666	0.162165	0.896936	0.246098	0.829545	0.172233	0.891396	0.259762	0.979644	3.9203e-07	0.987829	6.61173e-07	0.979718	3.543e-07	0.987874	5.9754e-07		3	3	4	3	3	4
5	13	vale-2010a	im-10,1	imidazolium	ntf2	NTf2 derivatives	1-eicosanol	alcohols	503.524	298.555	373.8	FALSE			0.089		0.141458		TRUE	TRUE	TRUE	TRUE	TRUE		0.822376	0.17669	0.886473	0.265757	0.81368	0.18773	0.880458	0.280466	0.978103	4.5945e-07	0.9869	7.74879e-07	0.978195	4.1468e-07	0.986955	6.99373e-07		3	3	4	3	3	4
5	13	vale-2010a	im-10,1	imidazolium	ntf2	NTf2 derivatives	1-eicosanol	alcohols	503.524	298.555	374.66	FALSE			0.14		0.215411		TRUE	TRUE	TRUE	TRUE	TRUE		0.818669	0.180216	0.883914	0.270476	0.809833	0.191502	0.877783	0.285446	0.977739	4.7627e-07	0.98668	8.03247e-07	0.977835	4.2974e-07	0.986738	7.24772e-07		3	3	4	3	3	4
5	13	vale-2010a	im-10,1	imidazolium	ntf2	NTf2 derivatives	1-eicosanol	alcohols	503.524	298.555	374.77	FALSE		0.19		0.283466			TRUE	TRUE	TRUE	TRUE	TRUE		0.818189	0.180673	0.883583	0.271086	0.809335	0.191991	0.877436	0.28609	0.977692	4.7846e-07	0.986652	8.0694e-07	0.977789	4.317e-07	0.98671	7.28078e-07		3	3	4	3	3	4
5	13	vale-2010a	im-10,1	imidazolium	ntf2	NTf2 derivatives	1-eicosanol	alcohols	503.524	298.555	374.32	FALSE		0.265		0.378137			TRUE	TRUE	TRUE	TRUE	TRUE		0.820144	0.178813	0.884933	0.268601	0.811363	0.189999	0.878848	0.283465	0.977884	4.6956e-07	0.986767	7.9193e-07	0.977978	4.2373e-07	0.986824	7.14636e-07		3	3	4	3	3	4
5	13	vale-2010a	im-10,1	imidazolium	ntf2	NTf2 derivatives	1-eicosanol	alcohols	503.524	298.555	372.98	FALSE		0.325		0.448135			TRUE	TRUE	TRUE	TRUE	TRUE		0.825838	0.173398	0.888854	0.261332	0.817272	0.184212	0.882948	0.2758	0.978446	4.4389e-07	0.987107	7.48637e-07	0.978534	4.0076e-07	0.98716	6.75896e-07		3	3	4	3	3	4
5	13	vale-2010a	im-10,1	imidazolium	ntf2	NTf2 derivatives	1-eicosanol	alcohols	503.524	298.555	371.14	FALSE		0.373		0.500827			TRUE	TRUE	TRUE	TRUE	TRUE		0.833362	0.16625	0.894005	0.251663	0.825079	0.176586	0.888333	0.265617	0.979204	4.1066e-07	0.987564	6.92593e-07	0.979282	3.71e-07	0.987611	6.25705e-07		3	3	4	3	3	4
5	13	vale-2010a	im-10,1	imidazolium	ntf2	NTf2 derivatives	1-eicosanol	alcohols	503.524	298.555	369.79	FALSE		0.406		0.535478			TRUE	TRUE	TRUE	TRUE	TRUE		0.838676	0.161206	0.897623	0.244788	0.830594	0.171213	0.892114	0.258385	0.979748	3.8769e-07	0.987892	6.53853e-07	0.979821	3.5041e-07	0.987936	5.90979e-07		3	3	4	3	3	4
5	13	vale-2010a	im-10,1	imidazolium	ntf2	NTf2 derivatives	1-eicosanol	alcohols	503.524	298.555	367.27	FALSE		0.447		0.576855			TRUE	TRUE	TRUE	TRUE	TRUE		0.848159	0.152212	0.904037	0.232423	0.840436	0.161647	0.898817	0.24539	0.980739	3.4783e-07	0.988489	5.86628e-07	0.980801	3.1465e-07	0.988527	5.30669e-07		3	3	4	3	3	4
5	14	calado-2013	im-10,1	imidazolium	ntf2	NTf2 derivatives	p-xylene	aromatics	503.524	106.168	359.95	FALSE		0.0897		0.318495			TRUE	TRUE	TRUE	TRUE	TRUE										0.306614	3.8566e-07	0.67713	1.82907e-06	0.308662	3.9214e-07	0.679228	1.8598e-06		3	3	1	3	3	1
5	14	calado-2013	im-10,1	imidazolium	ntf2	NTf2 derivatives	p-xylene	aromatics	503.524	106.168	353.85	FALSE		0.092		0.32457			TRUE	TRUE	TRUE	TRUE	TRUE										0.319942	2.9043e-07	0.690524	1.37742e-06	0.322004	2.9496e-07	0.692542	1.39891e-06		3	3	1	3	3	1
5	14	calado-2013	im-10,1	imidazolium	ntf2	NTf2 derivatives	p-xylene	aromatics	503.524	106.168	342.65	FALSE		0.097		0.337512			TRUE	TRUE	TRUE	TRUE	TRUE										0.34535	1.702e-07	0.714444	8.07209e-07	0.347448	1.7253e-07	0.716331	8.18259e-07		3	3	1	3	3	1
5	14	calado-2013	im-10,1	imidazolium	ntf2	NTf2 derivatives	p-xylene	aromatics	503.524	106.168	327.65	FALSE		0.1065		0.361146			TRUE	TRUE	TRUE	TRUE	TRUE										0.38126	8.036e-08	0.745054	3.81124e-07	0.383422	8.1302e-08	0.746789	3.85592e-07		3	3	1	3	3	1
5	14	calado-2013	im-10,1	imidazolium	ntf2	NTf2 derivatives	p-xylene	aromatics	503.524	106.168	298.15	FALSE		0.1139		0.37874			TRUE	TRUE	TRUE	TRUE	TRUE										0.457783	1.5635e-08	0.800167	7.41523e-08	0.460112	1.5778e-08	0.801662	7.48305e-08		3	3	1	3	3	1
5	15	ferreira-2008	im-10,1	imidazolium	ntf2	NTf2 derivatives	1-propanol	alcohols	503.524	60.096	252.3	FALSE			0.038		0.248666		TRUE	TRUE	TRUE	TRUE	TRUE										0.0518589	4.6659e-05	0.314258	0.000390805	0.0644399	5.8282e-05	0.365929	0.000488115		3	3	4	3	3	4
5	15	ferreira-2008	im-10,1	imidazolium	ntf2	NTf2 derivatives	1-propanol	alcohols	503.524	60.096	261.2	FALSE			0.052		0.314876		TRUE	TRUE	FALSE	TRUE	FALSE														0.0588616	8.2517e-05	0.343843	0.000690961		3	3	4	3	3	4
5	15	ferreira-2008	im-10,1	imidazolium	ntf2	NTf2 derivatives	1-propanol	alcohols	503.524	60.096	267.5	FALSE			0.083		0.431293		TRUE	TRUE	FALSE	TRUE	FALSE														0.0546872	0.00010566	0.326469	0.0008846		3	3	4	3	3	4
5	15	ferreira-2008	im-10,1	imidazolium	ntf2	NTf2 derivatives	1-propanol	alcohols	503.524	60.096	270.4	FALSE			0.102		0.487625		TRUE	TRUE	FALSE	TRUE	FALSE														0.0527362	0.00011847	0.318085	0.000991753		3	3	4	3	3	4
5	15	ferreira-2008	im-10,1	imidazolium	ntf2	NTf2 derivatives	1-propanol	alcohols	503.524	60.096	259.9	FALSE			0.76		0.963679		TRUE	TRUE	FALSE	TRUE	FALSE														0.0597058	7.8427e-05	0.347266	0.000656733		3	3	4	3	3	4
5	15	ferreira-2008	im-10,1	imidazolium	ntf2	NTf2 derivatives	1-propanol	alcohols	503.524	60.096	266.2	FALSE			0.69		0.949108		TRUE	TRUE	FALSE	TRUE	FALSE														0.055557	0.00010039	0.330152	0.000840511		3	3	4	3	3	4
5	15	ferreira-2008	im-10,1	imidazolium	ntf2	NTf2 derivatives	1-propanol	alcohols	503.524	60.096	270.7	FALSE			0.625		0.933175		TRUE	TRUE	FALSE	TRUE	FALSE														0.0525341	0.00011989	0.317206	0.00100363		3	3	4	3	3	4
5	15	ferreira-2008	im-10,1	imidazolium	ntf2	NTf2 derivatives	1-propanol	alcohols	503.524	60.096	256.9	FALSE			0.045		0.283054		TRUE	TRUE	FALSE	TRUE	FALSE														0.0616193	6.9752e-05	0.354918	0.000584128		3	3	4	3	3	4
5	15	ferreira-2008	im-10,1	imidazolium	ntf2	NTf2 derivatives	1-propanol	alcohols	503.524	60.096	262.9	FALSE			0.067		0.375657		TRUE	TRUE	FALSE	TRUE	FALSE														0.057748	8.8196e-05	0.339282	0.000738484		3	3	4	3	3	4
5	15	ferreira-2008	im-10,1	imidazolium	ntf2	NTf2 derivatives	1-propanol	alcohols	503.524	60.096	266	FALSE			0.08		0.42149		TRUE	TRUE	FALSE	TRUE	FALSE														0.0556905	9.9603e-05	0.330714	0.000833927		3	3	4	3	3	4
5	15	ferreira-2008	im-10,1	imidazolium	ntf2	NTf2 derivatives	1-propanol	alcohols	503.524	60.096	268.6	FALSE			0.094		0.465043		TRUE	TRUE	FALSE	TRUE	FALSE														0.0539481	0.00011034	0.323313	0.000923749		3	3	4	3	3	4
5	15	ferreira-2008	im-10,1	imidazolium	ntf2	NTf2 derivatives	1-propanol	alcohols	503.524	60.096	270.8	FALSE			0.121		0.535613		TRUE	TRUE	FALSE	TRUE	FALSE														0.0524667	0.00012036	0.316913	0.00100756		3	3	4	3	3	4
5	15	ferreira-2008	im-10,1	imidazolium	ntf2	NTf2 derivatives	1-propanol	alcohols	503.524	60.096	272.2	FALSE			0.139		0.574948		TRUE	TRUE	FALSE	TRUE	FALSE														0.0515221	0.00012723	0.312779	0.00106502		3	3	4	3	3	4
5	15	ferreira-2008	im-10,1	imidazolium	ntf2	NTf2 derivatives	1-propanol	alcohols	503.524	60.096	274.1	FALSE			0.168		0.628508		TRUE	TRUE	FALSE	TRUE	FALSE														0.0502411	0.00013723	0.307105	0.00114864		3	3	4	3	3	4
5	15	ferreira-2008	im-10,1	imidazolium	ntf2	NTf2 derivatives	1-propanol	alcohols	503.524	60.096	274.4	FALSE			0.185		0.655399		TRUE	TRUE	FALSE	FALSE	FALSE																			3	3	4	3	3	4
5	15	ferreira-2008	im-10,1	imidazolium	ntf2	NTf2 derivatives	1-propanol	alcohols	503.524	60.096	275	FALSE			0.219		0.701444		TRUE	TRUE	FALSE	FALSE	FALSE																			3	3	4	3	3	4
5	15	ferreira-2008	im-10,1	imidazolium	ntf2	NTf2 derivatives	1-propanol	alcohols	503.524	60.096	275.6	FALSE			0.261		0.747422		TRUE	TRUE	FALSE	FALSE	FALSE																			3	3	4	3	3	4
5	15	ferreira-2008	im-10,1	imidazolium	ntf2	NTf2 derivatives	1-propanol	alcohols	503.524	60.096	276	FALSE			0.313		0.792417		TRUE	TRUE	FALSE	FALSE	FALSE																			3	3	4	3	3	4
5	15	ferreira-2008	im-10,1	imidazolium	ntf2	NTf2 derivatives	1-propanol	alcohols	503.524	60.096	275.9	FALSE			0.26		0.746441		TRUE	TRUE	FALSE	FALSE	FALSE																			3	3	4	3	3	4
5	15	ferreira-2008	im-10,1	imidazolium	ntf2	NTf2 derivatives	1-propanol	alcohols	503.524	60.096	276.1	FALSE		0.329		0.804235			TRUE	TRUE	FALSE	FALSE	FALSE																			3	3	4	3	3	4
5	15	ferreira-2008	im-10,1	imidazolium	ntf2	NTf2 derivatives	1-propanol	alcohols	503.524	60.096	275.8	FALSE		0.382		0.838163			TRUE	TRUE	FALSE	FALSE	FALSE																			3	3	4	3	3	4
5	15	ferreira-2008	im-10,1	imidazolium	ntf2	NTf2 derivatives	1-propanol	alcohols	503.524	60.096	275.6	FALSE		0.436		0.866259			TRUE	TRUE	FALSE	FALSE	FALSE																			3	3	4	3	3	4
5	15	ferreira-2008	im-10,1	imidazolium	ntf2	NTf2 derivatives	1-propanol	alcohols	503.524	60.096	274.1	FALSE		0.48		0.885507			TRUE	TRUE	FALSE	TRUE	FALSE														0.0502411	0.00013723	0.307105	0.00114864		3	3	4	3	3	4
5	15	ferreira-2008	im-10,1	imidazolium	ntf2	NTf2 derivatives	1-propanol	alcohols	503.524	60.096	273.1	FALSE		0.527		0.903243			TRUE	TRUE	FALSE	TRUE	FALSE														0.0509156	0.00013187	0.310102	0.00110382		3	3	4	3	3	4
5	15	ferreira-2008	im-10,1	imidazolium	ntf2	NTf2 derivatives	1-propanol	alcohols	503.524	60.096	272.2	FALSE		0.565		0.915844			TRUE	TRUE	FALSE	TRUE	FALSE														0.0515221	0.00012723	0.312779	0.00106502		3	3	4	3	3	4
5	15	ferreira-2008	im-10,1	imidazolium	ntf2	NTf2 derivatives	1-propanol	alcohols	503.524	60.096	270.6	FALSE		0.605		0.92771			TRUE	TRUE	FALSE	TRUE	FALSE														0.0526015	0.00011941	0.317499	0.000999615		3	3	4	3	3	4
5	15	ferreira-2008	im-10,1	imidazolium	ntf2	NTf2 derivatives	1-propanol	alcohols	503.524	60.096	268.3	FALSE		0.653		0.94036			TRUE	TRUE	FALSE	TRUE	FALSE														0.0541496	0.00010904	0.324176	0.000912875		3	3	4	3	3	4
5	15	ferreira-2008	im-10,1	imidazolium	ntf2	NTf2 derivatives	1-propanol	alcohols	503.524	60.096	263	FALSE		0.73		0.957723			TRUE	TRUE	FALSE	TRUE	FALSE														0.0576822	8.8542e-05	0.339011	0.000741379		3	3	4	3	3	4
5	16	ferreira-2008	im-10,1	imidazolium	ntf2	NTf2 derivatives	4,4,5,5,6,6,7,7,8,8,9,9,9-tridecafluoro-1-nonanol	alcohols	503.524	378.133	280.8	FALSE			0.093		0.120134		TRUE	TRUE	TRUE	TRUE	TRUE		0.870666	0.0345139	0.899641	0.0454389	0.872111	0.0348191	0.900799	0.0458361	0.97481	4.0696e-09	0.980964	5.4191e-09	0.976528	6.3317e-09	0.982269	8.43133e-09		3	3	9	3	3	9
5	16	ferreira-2008	im-10,1	imidazolium	ntf2	NTf2 derivatives	4,4,5,5,6,6,7,7,8,8,9,9,9-tridecafluoro-1-nonanol	alcohols	503.524	378.133	283.3	FALSE			0.118		0.151213		TRUE	TRUE	TRUE	TRUE	TRUE		0.861767	0.0371092	0.89249	0.0488141	0.863302	0.0374134	0.893726	0.0492094	0.973068	4.8739e-09	0.979638	6.49011e-09	0.974884	7.5326e-09	0.98102	1.00305e-08		3	3	9	3	3	9
5	16	ferreira-2008	im-10,1	imidazolium	ntf2	NTf2 derivatives	4,4,5,5,6,6,7,7,8,8,9,9,9-tridecafluoro-1-nonanol	alcohols	503.524	378.133	285.5	FALSE			0.141		0.17937		TRUE	TRUE	TRUE	TRUE	TRUE		0.853512	0.0395537	0.885826	0.0519881	0.85513	0.0398569	0.887135	0.0523813	0.971462	5.698e-09	0.978415	7.58749e-09	0.973365	8.7561e-09	0.979865	1.16597e-08		3	3	9	3	3	9
5	16	ferreira-2008	im-10,1	imidazolium	ntf2	NTf2 derivatives	4,4,5,5,6,6,7,7,8,8,9,9,9-tridecafluoro-1-nonanol	alcohols	503.524	378.133	287.1	FALSE			0.174		0.21906		TRUE	TRUE	TRUE	TRUE	TRUE		0.847249	0.0414329	0.880752	0.0544245	0.84893	0.0417351	0.882115	0.054816	0.970251	6.3743e-09	0.977492	8.48805e-09	0.972218	9.7557e-09	0.978991	1.29907e-08		3	3	9	3	3	9
5	16	ferreira-2008	im-10,1	imidazolium	ntf2	NTf2 derivatives	4,4,5,5,6,6,7,7,8,8,9,9,9-tridecafluoro-1-nonanol	alcohols	503.524	378.133	287.9	FALSE			0.222		0.275346		TRUE	TRUE	TRUE	TRUE	TRUE		0.844033	0.0424063	0.87814	0.0556854	0.845746	0.042708	0.879532	0.056076	0.969631	6.739e-09	0.97702	8.97369e-09	0.971631	1.0293e-08	0.978544	1.37062e-08		3	3	9	3	3	9
5	16	ferreira-2008	im-10,1	imidazolium	ntf2	NTf2 derivatives	4,4,5,5,6,6,7,7,8,8,9,9,9-tridecafluoro-1-nonanol	alcohols	503.524	378.133	288.3	FALSE			0.273		0.333351		TRUE	TRUE	TRUE	TRUE	TRUE		0.842403	0.0429015	0.876814	0.0563265	0.844133	0.0432032	0.878222	0.056717	0.969318	6.9283e-09	0.976781	9.22576e-09	0.971334	1.0572e-08	0.978318	1.40777e-08		3	3	9	3	3	9
5	16	ferreira-2008	im-10,1	imidazolium	ntf2	NTf2 derivatives	4,4,5,5,6,6,7,7,8,8,9,9,9-tridecafluoro-1-nonanol	alcohols	503.524	378.133	287.8	FALSE			0.35		0.417595		TRUE	TRUE	TRUE	TRUE	TRUE		0.844438	0.0422834	0.878469	0.0555262	0.846147	0.0425851	0.879858	0.055917	0.969709	6.6924e-09	0.977079	8.91164e-09	0.971705	1.0225e-08	0.978601	1.36157e-08		3	3	9	3	3	9
5	16	ferreira-2008	im-10,1	imidazolium	ntf2	NTf2 derivatives	4,4,5,5,6,6,7,7,8,8,9,9,9-tridecafluoro-1-nonanol	alcohols	503.524	378.133	286.1	FALSE			0.406		0.476482		TRUE	TRUE	TRUE	TRUE	TRUE		0.851189	0.0402482	0.883946	0.0528888	0.852831	0.040551	0.885275	0.0532815	0.971012	5.9436e-09	0.978072	7.91453e-09	0.97294	9.1195e-09	0.97954	1.21436e-08		3	3	9	3	3	9
5	16	ferreira-2008	im-10,1	imidazolium	ntf2	NTf2 derivatives	4,4,5,5,6,6,7,7,8,8,9,9,9-tridecafluoro-1-nonanol	alcohols	503.524	378.133	270.3	FALSE			0.048		0.0629156		TRUE	TRUE	TRUE	TRUE	TRUE		0.902966	0.025423	0.925326	0.0335704	0.904071	0.0257283	0.926197	0.0339701	0.981224	1.8434e-09	0.985833	2.45468e-09	0.982547	2.9568e-09	0.986836	3.93729e-09		3	3	9	3	3	9
5	16	ferreira-2008	im-10,1	imidazolium	ntf2	NTf2 derivatives	4,4,5,5,6,6,7,7,8,8,9,9,9-tridecafluoro-1-nonanol	alcohols	503.524	378.133	276.6	FALSE			0.072		0.0936399		TRUE	TRUE	TRUE	TRUE	TRUE		0.884529	0.0305512	0.910717	0.0402742	0.885831	0.0308572	0.911753	0.0406734	0.977547	2.985e-09	0.983044	3.97484e-09	0.979103	4.6988e-09	0.984225	6.25695e-09		3	3	9	3	3	9
5	16	ferreira-2008	im-10,1	imidazolium	ntf2	NTf2 derivatives	4,4,5,5,6,6,7,7,8,8,9,9,9-tridecafluoro-1-nonanol	alcohols	503.524	378.133	274.3	FALSE			0.062		0.0808964		TRUE	TRUE	TRUE	TRUE	TRUE		0.891574	0.0285731	0.916316	0.0376909	0.892802	0.028879	0.917289	0.0380907	0.978947	2.5094e-09	0.984107	3.34153e-09	0.980417	3.9767e-09	0.985221	5.2954e-09		3	3	9	3	3	9
5	16	ferreira-2008	im-10,1	imidazolium	ntf2	NTf2 derivatives	4,4,5,5,6,6,7,7,8,8,9,9,9-tridecafluoro-1-nonanol	alcohols	503.524	378.133	278.1	FALSE			0.078		0.101246		TRUE	TRUE	TRUE	TRUE	TRUE		0.879729	0.0319124	0.906891	0.0420497	0.881081	0.0322182	0.90797	0.0424484	0.976597	3.3378e-09	0.982322	4.44463e-09	0.978209	5.2319e-09	0.983547	6.96683e-09		3	3	9	3	3	9
5	16	ferreira-2008	im-10,1	imidazolium	ntf2	NTf2 derivatives	4,4,5,5,6,6,7,7,8,8,9,9,9-tridecafluoro-1-nonanol	alcohols	503.524	378.133	288.2	FALSE		0.291		0.353396			TRUE	TRUE	TRUE	TRUE	TRUE		0.842812	0.0427771	0.877147	0.0561655	0.844538	0.0430788	0.87855	0.0565561	0.969396	6.8805e-09	0.976841	9.16211e-09	0.971409	1.0502e-08	0.978375	1.39845e-08		3	3	9	3	3	9
5	16	ferreira-2008	im-10,1	imidazolium	ntf2	NTf2 derivatives	4,4,5,5,6,6,7,7,8,8,9,9,9-tridecafluoro-1-nonanol	alcohols	503.524	378.133	288	FALSE		0.329		0.395004			TRUE	TRUE	TRUE	TRUE	TRUE		0.843627	0.0425296	0.87781	0.0558451	0.845344	0.0428312	0.879206	0.0562356	0.969553	6.7858e-09	0.97696	9.03601e-09	0.971557	1.0362e-08	0.978488	1.37981e-08		3	3	9	3	3	9
5	16	ferreira-2008	im-10,1	imidazolium	ntf2	NTf2 derivatives	4,4,5,5,6,6,7,7,8,8,9,9,9-tridecafluoro-1-nonanol	alcohols	503.524	378.133	286.6	FALSE		0.388		0.457765			TRUE	TRUE	TRUE	TRUE	TRUE		0.84923	0.040836	0.882359	0.053651	0.850891	0.0411388	0.883705	0.0540434	0.970633	6.1555e-09	0.977784	8.1967e-09	0.972581	9.4328e-09	0.979267	1.25608e-08		3	3	9	3	3	9
5	16	ferreira-2008	im-10,1	imidazolium	ntf2	NTf2 derivatives	4,4,5,5,6,6,7,7,8,8,9,9,9-tridecafluoro-1-nonanol	alcohols	503.524	378.133	284.9	FALSE		0.451		0.522424			TRUE	TRUE	TRUE	TRUE	TRUE		0.855803	0.0388714	0.887679	0.0511026	0.857398	0.0391748	0.888967	0.0514965	0.971907	5.4616e-09	0.978754	7.2727e-09	0.973786	8.4057e-09	0.980185	1.11931e-08		3	3	9	3	3	9
5	16	ferreira-2008	im-10,1	imidazolium	ntf2	NTf2 derivatives	4,4,5,5,6,6,7,7,8,8,9,9,9-tridecafluoro-1-nonanol	alcohols	503.524	378.133	283	FALSE		0.501		0.57209			TRUE	TRUE	TRUE	TRUE	TRUE		0.862861	0.0367878	0.893371	0.0483964	0.864385	0.0370921	0.894597	0.048792	0.973281	4.7704e-09	0.979801	6.35229e-09	0.975085	7.3784e-09	0.981173	9.82512e-09		3	3	9	3	3	9
5	16	ferreira-2008	im-10,1	imidazolium	ntf2	NTf2 derivatives	4,4,5,5,6,6,7,7,8,8,9,9,9-tridecafluoro-1-nonanol	alcohols	503.524	378.133	279.3	FALSE		0.573		0.641179			TRUE	TRUE	TRUE	TRUE	TRUE		0.87577	0.033044	0.903728	0.0435246	0.877162	0.0333495	0.904841	0.0439227	0.975815	3.6469e-09	0.981728	4.85623e-09	0.977474	5.6973e-09	0.982988	7.58656e-09		3	3	9	3	3	9
5	16	ferreira-2008	im-10,1	imidazolium	ntf2	NTf2 derivatives	4,4,5,5,6,6,7,7,8,8,9,9,9-tridecafluoro-1-nonanol	alcohols	503.524	378.133	273	FALSE		0.648		0.71026			TRUE	TRUE	TRUE	TRUE	TRUE		0.895394	0.0275103	0.919342	0.0363017	0.896581	0.0278161	0.920282	0.0367016	0.979709	2.2722e-09	0.984685	3.02567e-09	0.98113	3.6147e-09	0.985763	4.81335e-09		3	3	9	3	3	9
5	16	ferreira-2008	im-10,1	imidazolium	ntf2	NTf2 derivatives	4,4,5,5,6,6,7,7,8,8,9,9,9-tridecafluoro-1-nonanol	alcohols	503.524	378.133	269.3	FALSE		0.703		0.759147			TRUE	TRUE	TRUE	TRUE	TRUE		0.905651	0.024689	0.927441	0.032609	0.906726	0.024994	0.928288	0.0330085	0.981762	1.7043e-09	0.986241	2.26946e-09	0.98305	2.7423e-09	0.987217	3.65166e-09		3	3	9	3	3	9
6	1	santos-2012	im-10,1	imidazolium	otf	sulfonates	aniline	amines	372.447	93.129	290.21	FALSE			0.1579		0.428536		TRUE	TRUE	TRUE	TRUE	TRUE																			3	1	1	3	1	1
6	1	santos-2012	im-10,1	imidazolium	otf	sulfonates	aniline	amines	372.447	93.129	295.87	FALSE			0.1605		0.433299		TRUE	TRUE	TRUE	TRUE	TRUE																			3	1	1	3	1	1
6	1	santos-2012	im-10,1	imidazolium	otf	sulfonates	aniline	amines	372.447	93.129	318.84	FALSE			0.1658		0.442855		TRUE	TRUE	TRUE	TRUE	TRUE																			3	1	1	3	1	1
6	1	santos-2012	im-10,1	imidazolium	otf	sulfonates	aniline	amines	372.447	93.129	378.13	FALSE			0.1764		0.461372		TRUE	TRUE	TRUE	TRUE	TRUE																			3	1	1	3	1	1
6	1	santos-2012	im-10,1	imidazolium	otf	sulfonates	aniline	amines	372.447	93.129	375.1	FALSE		0.7055		0.905487			TRUE	TRUE	TRUE	TRUE	TRUE																			3	1	1	3	1	1
6	1	santos-2012	im-10,1	imidazolium	otf	sulfonates	aniline	amines	372.447	93.129	350.56	FALSE		0.7235		0.912775			TRUE	TRUE	TRUE	TRUE	TRUE																			3	1	1	3	1	1
6	1	santos-2012	im-10,1	imidazolium	otf	sulfonates	aniline	amines	372.447	93.129	306	FALSE		0.7395		0.919048			TRUE	TRUE	TRUE	TRUE	TRUE																			3	1	1	3	1	1
6	1	santos-2012	im-10,1	imidazolium	otf	sulfonates	aniline	amines	372.447	93.129	290.31	FALSE		0.7419		0.919973			TRUE	TRUE	TRUE	TRUE	TRUE																			3	1	1	3	1	1
6	2	trindade-2010	im-10,1	imidazolium	otf	sulfonates	water	water	372.447	18.015	289.4	FALSE			0.1745		0.81379		TRUE	TRUE	TRUE	TRUE	TRUE										0.430442	0.00208307	0.939848	0.0413705	0.426703	0.00212657	0.938979	0.0421997		3	1	1	3	1	1
6	2	trindade-2010	im-10,1	imidazolium	otf	sulfonates	water	water	372.447	18.015	302.9	FALSE			0.1811		0.820535		TRUE	TRUE	TRUE	TRUE	TRUE										0.417594	0.0017008	0.936804	0.0340243	0.414041	0.00173821	0.935932	0.0347479		3	1	1	3	1	1
6	2	trindade-2010	im-10,1	imidazolium	otf	sulfonates	water	water	372.447	18.015	305.7	FALSE			0.1819		0.821327		TRUE	TRUE	TRUE	TRUE	TRUE										0.414605	0.00164928	0.936072	0.033026	0.411093	0.00168593	0.935199	0.0337364		3	1	1	3	1	1
6	2	trindade-2010	im-10,1	imidazolium	otf	sulfonates	water	water	372.447	18.015	309.6	FALSE			0.1895		0.828584		TRUE	TRUE	TRUE	TRUE	TRUE										0.410266	0.00158956	0.934992	0.0318664	0.406815	0.00162539	0.934118	0.0325625		3	1	1	3	1	1
6	2	trindade-2010	im-10,1	imidazolium	otf	sulfonates	water	water	372.447	18.015	312.1	FALSE			0.1966		0.834962		FALSE	FALSE	TRUE	TRUE	FALSE										0.407383	0.00155791	0.934263	0.0312508	0.403971	0.00159335	0.933388	0.0319401		3	1	1	3	1	1
6	2	trindade-2010	im-10,1	imidazolium	otf	sulfonates	water	water	372.447	18.015	318.9	FALSE			0.2162		0.850806		TRUE	TRUE	TRUE	TRUE	TRUE		0.0928039	0.019143	0.678965	0.287491	0.0910811	0.0195947	0.674451	0.292387	0.399155	0.00149468	0.932131	0.0300187	0.395848	0.00152949	0.931253	0.0306974		3	1	1	3	1	1
6	2	trindade-2010	im-10,1	imidazolium	otf	sulfonates	water	water	372.447	18.015	324.7	FALSE			0.2368		0.865132		TRUE	TRUE	TRUE	TRUE	TRUE		0.101922	0.0160124	0.701163	0.251739	0.10057	0.016318	0.69804	0.255375	0.391713	0.00146388	0.930136	0.0294174	0.388495	0.0014986	0.929251	0.0300951		3	1	1	3	1	1
6	2	trindade-2010	im-10,1	imidazolium	otf	sulfonates	water	water	372.447	18.015	328.6	FALSE			0.2611		0.879598		TRUE	TRUE	TRUE	TRUE	TRUE		0.106203	0.0145514	0.710695	0.233882	0.105031	0.0147978	0.708138	0.236949	0.386502	0.00145375	0.928697	0.0292195	0.383348	0.00148864	0.92781	0.0299008		3	1	1	3	1	1
6	2	trindade-2010	im-10,1	imidazolium	otf	sulfonates	water	water	372.447	18.015	330.7	FALSE		0.2747		0.886752			TRUE	TRUE	TRUE	TRUE	TRUE		0.108024	0.0139086	0.714595	0.22577	0.106938	0.0141307	0.712281	0.228591	0.383633	0.00145159	0.927891	0.0291773	0.380511	0.00148665	0.927001	0.029862		3	1	1	3	1	1
6	2	trindade-2010	im-10,1	imidazolium	otf	sulfonates	water	water	372.447	18.015	337.7	FALSE		0.3902		0.929721			TRUE	TRUE	TRUE	TRUE	TRUE		0.112088	0.012283	0.722982	0.204518	0.111234	0.0124464	0.721254	0.206704	0.373756	0.00146016	0.925031	0.0293447	0.370746	0.00149611	0.924133	0.0300466		3	1	1	3	1	1
6	2	trindade-2010	im-10,1	imidazolium	otf	sulfonates	water	water	372.447	18.015	338.7	FALSE		0.4468		0.943496			TRUE	TRUE	TRUE	TRUE	TRUE		0.112448	0.012102	0.723705	0.202084	0.111622	0.012259	0.722042	0.204197	0.372308	0.0014633	0.9246	0.0294061	0.369314	0.00149943	0.923701	0.0301113		3	1	1	3	1	1
6	2	trindade-2010	im-10,1	imidazolium	otf	sulfonates	water	water	372.447	18.015	337.5	FALSE		0.5844		0.966746			TRUE	TRUE	TRUE	TRUE	TRUE		0.11201	0.0123205	0.722825	0.205021	0.11115	0.0124853	0.721084	0.207222	0.374044	0.00145958	0.925116	0.0293334	0.371031	0.0014955	0.924218	0.0300347		3	1	1	3	1	1
6	2	trindade-2010	im-10,1	imidazolium	otf	sulfonates	water	water	372.447	18.015	334.3	FALSE		0.6285		0.972204			TRUE	TRUE	TRUE	TRUE	TRUE		0.11047	0.0129864	0.719694	0.213847	0.109511	0.0131748	0.717713	0.216311	0.378612	0.00145303	0.926454	0.0292054	0.375546	0.00148847	0.925559	0.0298975		3	1	1	3	1	1
6	2	trindade-2010	im-10,1	imidazolium	otf	sulfonates	water	water	372.447	18.015	328.9	FALSE		0.6486		0.974464			TRUE	TRUE	TRUE	TRUE	TRUE		0.106483	0.0144542	0.7113	0.232665	0.105323	0.0146968	0.708779	0.235695	0.386095	0.0014533	0.928584	0.0292107	0.382945	0.00148822	0.927696	0.0298926		3	1	1	3	1	1
6	2	trindade-2010	im-10,1	imidazolium	otf	sulfonates	water	water	372.447	18.015	306.7	FALSE		0.7032		0.979993			TRUE	TRUE	TRUE	TRUE	TRUE										0.413512	0.00163269	0.935802	0.0327042	0.410015	0.00166911	0.934929	0.0334105		3	1	1	3	1	1
6	2	trindade-2010	im-10,1	imidazolium	otf	sulfonates	water	water	372.447	18.015	303.8	FALSE		0.7066		0.980311			TRUE	TRUE	TRUE	TRUE	TRUE										0.416645	0.0016834	0.936572	0.0336874	0.413105	0.00172054	0.935701	0.0344062		3	1	1	3	1	1
6	2	trindade-2010	im-10,1	imidazolium	otf	sulfonates	water	water	372.447	18.015	273.2	FALSE		0.7279		0.98224			TRUE	TRUE	TRUE	TRUE	TRUE										0.442119	0.00304631	0.942477	0.059419	0.438188	0.00310626	0.941606	0.060521		3	1	1	3	1	1
7	1	domanska-2016g	im-10,1	imidazolium	tcb	BF4 derivatives	water	water	338.258	18.015	287.7	FALSE		0.7194		0.97965			TRUE	TRUE	TRUE	TRUE	TRUE		0.654309	0.00042511	0.972632	0.00792219	0.655748	0.00042562	0.972801	0.00793163	0.890045	0.00013508	0.993464	0.00253025	0.889693	0.00013486	0.99344	0.00252614		3	2	1	3	1	1
7	1	domanska-2016g	im-10,1	imidazolium	tcb	BF4 derivatives	water	water	338.258	18.015	290.1	FALSE		0.7073		0.978436			TRUE	TRUE	TRUE	TRUE	TRUE		0.648427	0.00041522	0.971934	0.00773924	0.649909	0.00041558	0.972111	0.0077459	0.885774	0.00013506	0.993179	0.00252988	0.885425	0.00013488	0.993155	0.00252651		3	2	1	3	1	1
7	1	domanska-2016g	im-10,1	imidazolium	tcb	BF4 derivatives	water	water	338.258	18.015	293.9	FALSE		0.6909		0.976727			TRUE	TRUE	TRUE	TRUE	TRUE		0.63882	0.00040206	0.970769	0.00749569	0.64037	0.0004022	0.970959	0.00749828	0.878754	0.00013553	0.992705	0.00253866	0.87841	0.00013541	0.992682	0.00253642		3	2	1	3	1	1
7	1	domanska-2016g	im-10,1	imidazolium	tcb	BF4 derivatives	water	water	338.258	18.015	297.9	FALSE		0.6776		0.975286			TRUE	TRUE	TRUE	TRUE	TRUE		0.628332	0.00039121	0.969459	0.00729481	0.629953	0.00039112	0.969664	0.00729314	0.871022	0.00013666	0.992175	0.00255977	0.870685	0.00013661	0.992152	0.00255884		3	2	1	3	1	1
7	1	domanska-2016g	im-10,1	imidazolium	tcb	BF4 derivatives	water	water	338.258	18.015	301.2	FALSE		0.6618		0.973505			TRUE	TRUE	TRUE	TRUE	TRUE		0.619404	0.00038435	0.968312	0.00716776	0.62108	0.00038408	0.96853	0.00716276	0.864379	0.00013808	0.991713	0.00258631	0.86405	0.00013809	0.99169	0.00258649		3	2	1	3	1	1
7	1	domanska-2016g	im-10,1	imidazolium	tcb	BF4 derivatives	water	water	338.258	18.015	304.7	FALSE		0.6457		0.971607			TRUE	TRUE	TRUE	TRUE	TRUE		0.609674	0.00037897	0.967027	0.0070681	0.611407	0.00037852	0.967259	0.00705976	0.857077	0.00014008	0.991197	0.00262367	0.856757	0.00014013	0.991174	0.00262461		3	2	1	3	1	1
7	1	domanska-2016g	im-10,1	imidazolium	tcb	BF4 derivatives	water	water	338.258	18.015	307.6	FALSE		0.628		0.969417			TRUE	TRUE	TRUE	TRUE	TRUE		0.601421	0.0003759	0.965908	0.00701122	0.603201	0.0003753	0.966151	0.00700011	0.850827	0.00014211	0.990749	0.0026616	0.850517	0.00014221	0.990726	0.00266347		3	2	1	3	1	1
7	1	domanska-2016g	im-10,1	imidazolium	tcb	BF4 derivatives	water	water	338.258	18.015	311	FALSE		0.6144		0.967656			TRUE	TRUE	TRUE	TRUE	TRUE		0.591536	0.00037381	0.964529	0.0069725	0.593368	0.00037304	0.964788	0.00695823	0.843272	0.00014493	0.990199	0.00271428	0.842975	0.0001451	0.990177	0.00271746		3	2	1	3	1	1
7	1	domanska-2016g	im-10,1	imidazolium	tcb	BF4 derivatives	water	water	338.258	18.015	314.1	FALSE		0.5992		0.965601			TRUE	TRUE	TRUE	TRUE	TRUE		0.582339	0.00037326	0.963208	0.00696231	0.584216	0.00037233	0.963481	0.00694507	0.836174	0.00014794	0.989673	0.0027705	0.83589	0.00014816	0.989652	0.00277461		3	2	1	3	1	1
7	1	domanska-2016g	im-10,1	imidazolium	tcb	BF4 derivatives	water	water	338.258	18.015	317.2	FALSE		0.5863		0.963782			TRUE	TRUE	TRUE	TRUE	TRUE		0.572978	0.00037395	0.961824	0.00697509	0.574898	0.00037287	0.962111	0.00695508	0.828879	0.00015138	0.989124	0.00283475	0.828608	0.00015165	0.989104	0.0028398		3	2	1	3	1	1
7	1	domanska-2016g	im-10,1	imidazolium	tcb	BF4 derivatives	water	water	338.258	18.015	320.3	FALSE		0.5752		0.962156			TRUE	TRUE	TRUE	TRUE	TRUE		0.563464	0.00037586	0.960374	0.00701048	0.565425	0.00037462	0.960676	0.00698751	0.821392	0.00015525	0.988552	0.00290702	0.821137	0.00015558	0.988532	0.00291319		3	2	1	3	1	1
7	1	domanska-2016g	im-10,1	imidazolium	tcb	BF4 derivatives	water	water	338.258	18.015	325	FALSE		0.5488		0.95805			TRUE	TRUE	TRUE	TRUE	TRUE		0.548783	0.00038101	0.958047	0.00710589	0.550802	0.00037952	0.958374	0.00707829	0.809684	0.000162	0.987636	0.00303305	0.809455	0.00016242	0.987618	0.00304089		3	2	1	3	1	1
7	1	domanska-2016g	im-10,1	imidazolium	tcb	BF4 derivatives	water	water	338.258	18.015	327.3	FALSE		0.5415		0.956851			TRUE	TRUE	TRUE	TRUE	TRUE		0.541497	0.00038451	0.95685	0.00717072	0.543543	0.0003829	0.957189	0.0071409	0.803804	0.00016571	0.987167	0.00310231	0.803588	0.00016618	0.98715	0.00311108		3	2	1	3	1	1
7	1	domanska-2016g	im-10,1	imidazolium	tcb	BF4 derivatives	water	water	338.258	18.015	333.4	FALSE		0.5168		0.952566			TRUE	TRUE	TRUE	TRUE	TRUE		0.521899	0.00039692	0.953481	0.00740054	0.524008	0.00039496	0.953854	0.00736425	0.787747	0.00017693	0.985853	0.0033117	0.787569	0.00017753	0.985838	0.0033229		3	2	1	3	1	1
7	1	domanska-2016g	im-10,1	imidazolium	tcb	BF4 derivatives	water	water	338.258	18.015	338.4	FALSE		0.4927		0.948014			TRUE	TRUE	TRUE	TRUE	TRUE		0.505604	0.00041053	0.9505	0.00765246	0.507756	0.00040825	0.950904	0.00761026	0.774114	0.00018774	0.984697	0.00351337	0.773971	0.00018846	0.984685	0.0035268		3	2	1	3	1	1
7	1	domanska-2016g	im-10,1	imidazolium	tcb	BF4 derivatives	water	water	338.258	18.015	298.2	FALSE			2.9e-05		0.000544237		TRUE	TRUE	TRUE	TRUE	TRUE		0.627531	0.00039051	0.969357	0.00728185	0.629156	0.0003904	0.969563	0.00727981	0.870428	0.00013677	0.992134	0.00256183	0.870092	0.00013673	0.992111	0.00256108		3	2	1	3	1	1
7	1	domanska-2016g	im-10,1	imidazolium	tcb	BF4 derivatives	water	water	338.258	18.015	308.2	FALSE			5.3e-05		0.000994216		TRUE	TRUE	TRUE	TRUE	TRUE		0.599693	0.00037541	0.96567	0.00700214	0.601482	0.00037479	0.965916	0.00699066	0.849511	0.00014257	0.990654	0.00267019	0.849203	0.00014269	0.990631	0.00267243		3	2	1	3	1	1
7	1	domanska-2016g	im-10,1	imidazolium	tcb	BF4 derivatives	water	water	338.258	18.015	318.2	FALSE			7.6e-05		0.00142509		TRUE	TRUE	TRUE	TRUE	TRUE		0.569926	0.00037444	0.961363	0.00698417	0.571859	0.00037331	0.961656	0.00696323	0.826484	0.00015258	0.988942	0.00285716	0.826219	0.00015287	0.988922	0.00286258		3	2	1	3	1	1
7	1	domanska-2016g	im-10,1	imidazolium	tcb	BF4 derivatives	water	water	338.258	18.015	328.2	FALSE			0.0001		0.00187431		TRUE	TRUE	TRUE	TRUE	TRUE		0.538628	0.00038606	0.956371	0.00719943	0.540685	0.0003844	0.956715	0.00716869	0.801476	0.00016723	0.98698	0.00313068	0.801266	0.00016772	0.986963	0.00313983		3	2	1	3	1	1
8	1	vale-2010	im-12,1	imidazolium	ntf2	NTf2 derivatives	1-decanol	alcohols	531.561	158.285	282.65	FALSE			0.063		0.184203		TRUE	TRUE	TRUE	TRUE	TRUE		0.548348	0.105863	0.803042	0.28449	0.64503	0.0783822	0.859203	0.222162	0.921768	1.6972e-07	0.975351	5.69962e-07	0.923809	1.3736e-07	0.97603	4.61289e-07		3	3	6	3	3	6
8	1	vale-2010	im-12,1	imidazolium	ntf2	NTf2 derivatives	1-decanol	alcohols	531.561	158.285	287.66	FALSE			0.083		0.233108		TRUE	TRUE	TRUE	TRUE	TRUE		0.485012	0.132053	0.759776	0.338159	0.595853	0.0950352	0.831968	0.26072	0.913433	2.2283e-07	0.972554	7.48319e-07	0.915953	1.7924e-07	0.973403	6.01933e-07		3	3	6	3	3	6
8	1	vale-2010	im-12,1	imidazolium	ntf2	NTf2 derivatives	1-decanol	alcohols	531.561	158.285	287.96	FALSE		0.116		0.305881			TRUE	TRUE	TRUE	TRUE	TRUE		0.480771	0.133992	0.756662	0.341933	0.592695	0.0961963	0.830129	0.263317	0.912914	2.2644e-07	0.972379	7.60442e-07	0.915464	1.8208e-07	0.973239	6.1147e-07		3	3	6	3	3	6
8	1	vale-2010	im-12,1	imidazolium	ntf2	NTf2 derivatives	1-decanol	alcohols	531.561	158.285	287.05	FALSE		0.158		0.386567			TRUE	TRUE	TRUE	TRUE	TRUE		0.493448	0.128271	0.765884	0.330723	0.602193	0.0927398	0.835625	0.255553	0.91448	2.1564e-07	0.972907	7.24173e-07	0.916942	1.7358e-07	0.973735	5.82925e-07		3	3	6	3	3	6
8	1	vale-2010	im-12,1	imidazolium	ntf2	NTf2 derivatives	1-decanol	alcohols	531.561	158.285	287.05	FALSE		0.196		0.45015			TRUE	TRUE	TRUE	TRUE	TRUE		0.493448	0.128271	0.765884	0.330723	0.602193	0.0927398	0.835625	0.255553	0.91448	2.1564e-07	0.972907	7.24173e-07	0.916942	1.7358e-07	0.973735	5.82925e-07		3	3	6	3	3	6
8	1	vale-2010	im-12,1	imidazolium	ntf2	NTf2 derivatives	1-decanol	alcohols	531.561	158.285	287.01	FALSE		0.211		0.473154			TRUE	TRUE	TRUE	TRUE	TRUE		0.493992	0.128029	0.766273	0.330245	0.602605	0.0925923	0.835862	0.25522	0.914549	2.1518e-07	0.972931	7.22628e-07	0.917006	1.7322e-07	0.973757	5.81716e-07		3	3	6	3	3	6
8	1	vale-2010	im-12,1	imidazolium	ntf2	NTf2 derivatives	1-decanol	alcohols	531.561	158.285	280.85	FALSE		0.295		0.584239			TRUE	TRUE	TRUE	TRUE	TRUE		0.568453	0.0985057	0.815622	0.268447	0.661228	0.0734129	0.867633	0.210155	0.924615	1.5365e-07	0.976297	5.15995e-07	0.926487	1.2464e-07	0.976918	4.18572e-07		3	3	6	3	3	6
8	2	vale-2010	im-12,1	imidazolium	ntf2	NTf2 derivatives	1-undecanol	alcohols	531.561	172.312	283.85	FALSE			0.021		0.062065		TRUE	TRUE	TRUE	TRUE	TRUE		0.750068	0.0594788	0.902515	0.163242	0.720393	0.0664848	0.888244	0.180129	0.943821	1.0241e-07	0.98107	3.15922e-07	0.943397	8.5397e-08	0.980922	2.63439e-07		3	3	4	3	3	4
8	2	vale-2010	im-12,1	imidazolium	ntf2	NTf2 derivatives	1-undecanol	alcohols	531.561	172.312	288.35	FALSE			0.026		0.0760826		TRUE	TRUE	TRUE	TRUE	TRUE		0.717426	0.068819	0.886778	0.18566	0.684646	0.077584	0.870086	0.206014	0.938531	1.3008e-07	0.979211	4.0128e-07	0.93782	1.0922e-07	0.978959	3.3693e-07		3	3	4	3	3	4
8	2	vale-2010	im-12,1	imidazolium	ntf2	NTf2 derivatives	1-undecanol	alcohols	531.561	172.312	290.12	FALSE			0.046		0.129486		TRUE	TRUE	TRUE	TRUE	TRUE		0.703523	0.0729907	0.879811	0.195428	0.669432	0.0826131	0.862015	0.217406	0.936342	1.4273e-07	0.978437	4.40304e-07	0.935512	1.2015e-07	0.978143	3.70648e-07		3	3	4	3	3	4
8	2	vale-2010	im-12,1	imidazolium	ntf2	NTf2 derivatives	1-undecanol	alcohols	531.561	172.312	291.18	FALSE			0.056		0.154692		TRUE	TRUE	TRUE	TRUE	TRUE		0.694893	0.0756472	0.875404	0.201571	0.659977	0.0858379	0.856891	0.224604	0.935001	1.5084e-07	0.977962	4.65322e-07	0.934099	1.2716e-07	0.977642	3.92273e-07		3	3	4	3	3	4
8	2	vale-2010	im-12,1	imidazolium	ntf2	NTf2 derivatives	1-undecanol	alcohols	531.561	172.312	292.25	FALSE			0.088		0.229384		TRUE	TRUE	TRUE	TRUE	TRUE		0.685948	0.0784622	0.870767	0.208018	0.65016	0.0892728	0.85148	0.232181	0.933624	1.5945e-07	0.977473	4.91883e-07	0.932649	1.3462e-07	0.977126	4.15286e-07		3	3	4	3	3	4
8	2	vale-2010	im-12,1	imidazolium	ntf2	NTf2 derivatives	1-undecanol	alcohols	531.561	172.312	293	FALSE			0.12		0.296104		TRUE	TRUE	TRUE	TRUE	TRUE		0.679517	0.0805159	0.867389	0.21268	0.643107	0.0917967	0.847534	0.237691	0.932645	1.6575e-07	0.977125	5.11318e-07	0.931619	1.4008e-07	0.976759	4.32129e-07		3	3	4	3	3	4
8	2	vale-2010	im-12,1	imidazolium	ntf2	NTf2 derivatives	1-undecanol	alcohols	531.561	172.312	292.9	FALSE			0.122		0.300039		TRUE	TRUE	TRUE	TRUE	TRUE		0.680382	0.0802379	0.867845	0.212051	0.644056	0.0914545	0.848068	0.236947	0.932777	1.649e-07	0.977172	5.08696e-07	0.931757	1.3934e-07	0.976809	4.29846e-07		3	3	4	3	3	4
8	2	vale-2010	im-12,1	imidazolium	ntf2	NTf2 derivatives	1-undecanol	alcohols	531.561	172.312	293.2	FALSE			0.154		0.35961		TRUE	TRUE	TRUE	TRUE	TRUE		0.677781	0.081076	0.86647	0.213945	0.641202	0.092487	0.846459	0.239189	0.932383	1.6747e-07	0.977031	5.16624e-07	0.931342	1.4157e-07	0.976661	4.36726e-07		3	3	4	3	3	4
8	2	vale-2010	im-12,1	imidazolium	ntf2	NTf2 derivatives	1-undecanol	alcohols	531.561	172.312	293.28	FALSE		0.179		0.402123			TRUE	TRUE	TRUE	TRUE	TRUE		0.67707	0.0812973	0.866093	0.214445	0.640437	0.0927651	0.846027	0.239792	0.932277	1.6816e-07	0.976994	5.18752e-07	0.931231	1.4217e-07	0.976621	4.38577e-07		3	3	4	3	3	4
8	2	vale-2010	im-12,1	imidazolium	ntf2	NTf2 derivatives	1-undecanol	alcohols	531.561	172.312	293.2	FALSE		0.181		0.405385			TRUE	TRUE	TRUE	TRUE	TRUE		0.677781	0.081076	0.86647	0.213945	0.641202	0.092487	0.846459	0.239189	0.932383	1.6747e-07	0.977031	5.16624e-07	0.931342	1.4157e-07	0.976661	4.36726e-07		3	3	4	3	3	4
8	2	vale-2010	im-12,1	imidazolium	ntf2	NTf2 derivatives	1-undecanol	alcohols	531.561	172.312	292.6	FALSE		0.226		0.473892			TRUE	TRUE	TRUE	TRUE	TRUE		0.682963	0.0794118	0.869203	0.210178	0.646887	0.0904383	0.849655	0.234732	0.933169	1.6236e-07	0.977311	5.0086e-07	0.93217	1.3714e-07	0.976956	4.2306e-07		3	3	4	3	3	4
8	2	vale-2010	im-12,1	imidazolium	ntf2	NTf2 derivatives	1-undecanol	alcohols	531.561	172.312	292.94	FALSE		0.252		0.509633			TRUE	TRUE	TRUE	TRUE	TRUE		0.680036	0.0803489	0.867663	0.212302	0.643677	0.0915912	0.847854	0.237244	0.932724	1.6524e-07	0.977153	5.09745e-07	0.931702	1.3963e-07	0.976789	4.30741e-07		3	3	4	3	3	4
8	2	vale-2010	im-12,1	imidazolium	ntf2	NTf2 derivatives	1-undecanol	alcohols	531.561	172.312	291.2	FALSE		0.289		0.556326			TRUE	TRUE	TRUE	TRUE	TRUE		0.69473	0.0756988	0.87532	0.20169	0.659796	0.0859004	0.856792	0.224742	0.934975	1.51e-07	0.977953	4.65816e-07	0.934073	1.273e-07	0.977632	3.92704e-07		3	3	4	3	3	4
8	2	vale-2010	im-12,1	imidazolium	ntf2	NTf2 derivatives	1-undecanol	alcohols	531.561	172.312	288.85	FALSE		0.333		0.606319			TRUE	TRUE	TRUE	TRUE	TRUE		0.713557	0.0699642	0.884855	0.188356	0.680418	0.0789621	0.867864	0.209156	0.937919	1.3355e-07	0.978994	4.11985e-07	0.937175	1.1221e-07	0.978731	3.46154e-07		3	3	4	3	3	4
8	2	vale-2010	im-12,1	imidazolium	ntf2	NTf2 derivatives	1-undecanol	alcohols	531.561	172.312	286.35	FALSE		0.371		0.645332			TRUE	TRUE	TRUE	TRUE	TRUE		0.732382	0.0644568	0.894094	0.175286	0.701032	0.0723777	0.878545	0.194002	0.940931	1.1703e-07	0.980056	3.61023e-07	0.940349	9.7968e-08	0.979851	3.02219e-07		3	3	4	3	3	4
8	3	vale-2010	im-12,1	imidazolium	ntf2	NTf2 derivatives	1-dodecanol	alcohols	531.561	186.339	296.36	FALSE			0.018		0.0496907		TRUE	TRUE	TRUE	TRUE	TRUE		0.638886	0.112162	0.834627	0.264912	0.700928	0.0860714	0.869888	0.211764	0.936269	2.1737e-07	0.976694	6.20082e-07	0.94311	1.3162e-07	0.979292	3.75466e-07		3	3	5	3	3	5
8	3	vale-2010	im-12,1	imidazolium	ntf2	NTf2 derivatives	1-dodecanol	alcohols	531.561	186.339	298.97	FALSE			0.024		0.0655492		TRUE	TRUE	TRUE	TRUE	TRUE		0.612627	0.123329	0.818559	0.286381	0.679064	0.0941379	0.857872	0.228663	0.932803	2.4908e-07	0.975369	7.10539e-07	0.940037	1.509e-07	0.978128	4.30466e-07		3	3	5	3	3	5
8	3	vale-2010	im-12,1	imidazolium	ntf2	NTf2 derivatives	1-dodecanol	alcohols	531.561	186.339	304.35	FALSE			0.053		0.137673		TRUE	TRUE	TRUE	TRUE	TRUE		0.549838	0.152945	0.777	0.339967	0.628507	0.114478	0.828363	0.269425	0.925249	3.2799e-07	0.972459	9.35642e-07	0.933324	1.9892e-07	0.975569	5.6745e-07		3	3	5	3	3	5
8	3	vale-2010	im-12,1	imidazolium	ntf2	NTf2 derivatives	1-dodecanol	alcohols	531.561	186.339	305.57	FALSE			0.074		0.185645		TRUE	TRUE	TRUE	TRUE	TRUE		0.533407	0.161479	0.765321	0.354569	0.615846	0.120006	0.820569	0.280069	0.923459	3.4875e-07	0.971765	9.94863e-07	0.93173	2.1157e-07	0.974958	6.03536e-07		3	3	5	3	3	5
8	3	vale-2010	im-12,1	imidazolium	ntf2	NTf2 derivatives	1-dodecanol	alcohols	531.561	186.339	305.79	FALSE			0.092		0.224226		TRUE	TRUE	TRUE	TRUE	TRUE		0.53033	0.163117	0.763094	0.357331	0.613504	0.121046	0.819108	0.28205	0.923134	3.5262e-07	0.971639	1.0059e-06	0.93144	2.1392e-07	0.974846	6.1024e-07		3	3	5	3	3	5
8	3	vale-2010	im-12,1	imidazolium	ntf2	NTf2 derivatives	1-dodecanol	alcohols	531.561	186.339	305.59	FALSE			0.095		0.230444		TRUE	TRUE	TRUE	TRUE	TRUE		0.533129	0.161627	0.765121	0.354819	0.615634	0.1201	0.820437	0.280248	0.92343	3.491e-07	0.971754	9.95861e-07	0.931704	2.1178e-07	0.974947	6.04135e-07		3	3	5	3	3	5
8	3	vale-2010	im-12,1	imidazolium	ntf2	NTf2 derivatives	1-dodecanol	alcohols	531.561	186.339	305.83	FALSE			0.117		0.274303		TRUE	TRUE	TRUE	TRUE	TRUE		0.529766	0.163418	0.762685	0.357837	0.613077	0.121236	0.818841	0.282413	0.923074	3.5333e-07	0.971616	1.00793e-06	0.931387	2.1436e-07	0.974826	6.11495e-07		3	3	5	3	3	5
8	3	vale-2010	im-12,1	imidazolium	ntf2	NTf2 derivatives	1-dodecanol	alcohols	531.561	186.339	305.94	FALSE		0.12		0.280057			TRUE	TRUE	TRUE	TRUE	TRUE		0.528211	0.164253	0.761553	0.359239	0.611897	0.121763	0.818103	0.283413	0.922911	3.5528e-07	0.971552	1.01349e-06	0.931241	2.1555e-07	0.97477	6.1489e-07		3	3	5	3	3	5
8	3	vale-2010	im-12,1	imidazolium	ntf2	NTf2 derivatives	1-dodecanol	alcohols	531.561	186.339	305.81	FALSE		0.124		0.287648			TRUE	TRUE	TRUE	TRUE	TRUE		0.530048	0.163267	0.762889	0.357583	0.613291	0.121141	0.818975	0.282232	0.923104	3.5297e-07	0.971627	1.0069e-06	0.931413	2.1414e-07	0.974836	6.10867e-07		3	3	5	3	3	5
8	3	vale-2010	im-12,1	imidazolium	ntf2	NTf2 derivatives	1-dodecanol	alcohols	531.561	186.339	305.8	FALSE		0.127		0.293282			TRUE	TRUE	TRUE	TRUE	TRUE		0.53019	0.163192	0.762992	0.357458	0.613398	0.121093	0.819041	0.282141	0.923119	3.528e-07	0.971633	1.00642e-06	0.931426	2.1403e-07	0.974841	6.10554e-07		3	3	5	3	3	5
8	3	vale-2010	im-12,1	imidazolium	ntf2	NTf2 derivatives	1-dodecanol	alcohols	531.561	186.339	305.81	FALSE		0.14		0.31712			TRUE	TRUE	TRUE	TRUE	TRUE		0.530048	0.163267	0.762889	0.357583	0.613291	0.121141	0.818975	0.282232	0.923104	3.5297e-07	0.971627	1.0069e-06	0.931413	2.1414e-07	0.974836	6.10867e-07		3	3	5	3	3	5
8	3	vale-2010	im-12,1	imidazolium	ntf2	NTf2 derivatives	1-dodecanol	alcohols	531.561	186.339	305.84	FALSE		0.149		0.333096			TRUE	TRUE	TRUE	TRUE	TRUE		0.529626	0.163494	0.762583	0.357965	0.61297	0.121284	0.818774	0.282504	0.923059	3.535e-07	0.97161	1.00841e-06	0.931374	2.1446e-07	0.974821	6.1178e-07		3	3	5	3	3	5
8	3	vale-2010	im-12,1	imidazolium	ntf2	NTf2 derivatives	1-dodecanol	alcohols	531.561	186.339	305.87	FALSE		0.158		0.34866			TRUE	TRUE	TRUE	TRUE	TRUE		0.529201	0.16372	0.762274	0.358345	0.612648	0.121427	0.818573	0.282775	0.923015	3.5403e-07	0.971593	1.00993e-06	0.931334	2.1479e-07	0.974805	6.12722e-07		3	3	5	3	3	5
8	3	vale-2010	im-12,1	imidazolium	ntf2	NTf2 derivatives	1-dodecanol	alcohols	531.561	186.339	305.67	FALSE		0.173		0.373727			TRUE	TRUE	TRUE	TRUE	TRUE		0.532013	0.162219	0.764314	0.355819	0.614784	0.120477	0.819907	0.280967	0.923311	3.505e-07	0.971708	9.99855e-07	0.931598	2.1264e-07	0.974907	6.06588e-07		3	3	5	3	3	5
8	3	vale-2010	im-12,1	imidazolium	ntf2	NTf2 derivatives	1-dodecanol	alcohols	531.561	186.339	305.54	FALSE		0.199		0.414764			TRUE	TRUE	TRUE	TRUE	TRUE		0.533823	0.161257	0.765621	0.354195	0.616164	0.119865	0.820766	0.2798	0.923504	3.4823e-07	0.971782	9.9338e-07	0.93177	2.1125e-07	0.974973	6.02623e-07		3	3	5	3	3	5
8	3	vale-2010	im-12,1	imidazolium	ntf2	NTf2 derivatives	1-dodecanol	alcohols	531.561	186.339	305.12	FALSE		0.211		0.432746			TRUE	TRUE	TRUE	TRUE	TRUE		0.539588	0.158227	0.769756	0.349048	0.620584	0.117924	0.823505	0.27608	0.924123	3.4096e-07	0.972023	9.72641e-07	0.932321	2.0682e-07	0.975184	5.89986e-07		3	3	5	3	3	5
8	3	vale-2010	im-12,1	imidazolium	ntf2	NTf2 derivatives	1-dodecanol	alcohols	531.561	186.339	304.66	FALSE		0.233		0.464262			TRUE	TRUE	TRUE	TRUE	TRUE		0.545759	0.155031	0.774133	0.34357	0.625354	0.115852	0.826437	0.272086	0.924797	3.3316e-07	0.972284	9.5039e-07	0.932922	2.0207e-07	0.975415	5.76436e-07		3	3	5	3	3	5
8	3	vale-2010	im-12,1	imidazolium	ntf2	NTf2 derivatives	1-dodecanol	alcohols	531.561	186.339	303.67	FALSE		0.261		0.501868			TRUE	TRUE	TRUE	TRUE	TRUE		0.558531	0.148525	0.783037	0.332263	0.635363	0.11157	0.832513	0.263753	0.926235	3.1691e-07	0.97284	9.04035e-07	0.934201	1.9217e-07	0.975905	5.48195e-07		3	3	5	3	3	5
8	3	vale-2010	im-12,1	imidazolium	ntf2	NTf2 derivatives	1-dodecanol	alcohols	531.561	186.339	302.1	FALSE		0.288		0.535722			TRUE	TRUE	TRUE	TRUE	TRUE		0.57773	0.1392	0.796038	0.315679	0.650663	0.105271	0.841603	0.251291	0.928476	2.926e-07	0.973706	8.34687e-07	0.936195	1.7737e-07	0.976666	5.05975e-07		3	3	5	3	3	5
8	3	vale-2010	im-12,1	imidazolium	ntf2	NTf2 derivatives	1-dodecanol	alcohols	531.561	186.339	301.85	FALSE		0.302		0.552421			TRUE	TRUE	TRUE	TRUE	TRUE		0.580672	0.137809	0.797991	0.313166	0.653029	0.104315	0.842988	0.249379	0.928828	2.8888e-07	0.973842	8.24075e-07	0.936508	1.7511e-07	0.976786	4.99528e-07		3	3	5	3	3	5
8	3	vale-2010	im-12,1	imidazolium	ntf2	NTf2 derivatives	1-dodecanol	alcohols	531.561	186.339	299.81	FALSE		0.335		0.589668			TRUE	TRUE	TRUE	TRUE	TRUE		0.603635	0.127278	0.812888	0.293802	0.671702	0.0969604	0.853728	0.234475	0.93166	2.6015e-07	0.974931	7.42118e-07	0.939023	1.5763e-07	0.977743	4.49664e-07		3	3	5	3	3	5
8	3	vale-2010	im-12,1	imidazolium	ntf2	NTf2 derivatives	1-dodecanol	alcohols	531.561	186.339	298.26	FALSE		0.356		0.611942			TRUE	TRUE	TRUE	TRUE	TRUE		0.620002	0.12013	0.823145	0.280304	0.685165	0.0918444	0.861268	0.223902	0.933759	2.4007e-07	0.975735	6.84837e-07	0.940885	1.4541e-07	0.97845	4.14805e-07		3	3	5	3	3	5
8	4	vale-2010	im-12,1	imidazolium	ntf2	NTf2 derivatives	1-tetradecanol	alcohols	531.561	214.393	311.54	FALSE			0.023		0.0551492		TRUE	TRUE	TRUE	TRUE	TRUE		0.747002	0.0933794	0.879816	0.203421	0.735489	0.0969343	0.873322	0.210194	0.955884	1.3378e-07	0.981726	3.31691e-07	0.958869	1.0881e-07	0.982993	2.69781e-07		3	3	4	3	3	4
8	4	vale-2010	im-12,1	imidazolium	ntf2	NTf2 derivatives	1-tetradecanol	alcohols	531.561	214.393	316.35	FALSE			0.032		0.0757539		TRUE	TRUE	TRUE	TRUE	TRUE		0.71083	0.109272	0.859051	0.233225	0.697808	0.114081	0.851307	0.242006	0.951377	1.7115e-07	0.979803	4.24345e-07	0.95457	1.3937e-07	0.981166	3.45551e-07		3	3	4	3	3	4
8	4	vale-2010	im-12,1	imidazolium	ntf2	NTf2 derivatives	1-tetradecanol	alcohols	531.561	214.393	317.85	FALSE			0.037		0.0869761		TRUE	TRUE	TRUE	TRUE	TRUE		0.698465	0.114953	0.851701	0.243588	0.684921	0.120261	0.843498	0.253136	0.949906	1.8459e-07	0.979173	4.57668e-07	0.953166	1.5036e-07	0.980568	3.72799e-07		3	3	4	3	3	4
8	4	vale-2010	im-12,1	imidazolium	ntf2	NTf2 derivatives	1-tetradecanol	alcohols	531.561	214.393	319.03	FALSE			0.062		0.140806		TRUE	TRUE	TRUE	TRUE	TRUE		0.688326	0.119711	0.845576	0.252153	0.67435	0.125459	0.836981	0.262365	0.948728	1.9583e-07	0.978668	4.85536e-07	0.95204	1.5955e-07	0.980087	3.95584e-07		3	3	4	3	3	4
8	4	vale-2010	im-12,1	imidazolium	ntf2	NTf2 derivatives	1-tetradecanol	alcohols	531.561	214.393	320.45	FALSE			0.087		0.191109		TRUE	TRUE	TRUE	TRUE	TRUE		0.675607	0.125811	0.837761	0.262985	0.661082	0.132158	0.828656	0.274083	0.947284	2.1016e-07	0.978048	5.21066e-07	0.950661	1.7127e-07	0.979496	4.24643e-07		3	3	4	3	3	4
8	4	vale-2010	im-12,1	imidazolium	ntf2	NTf2 derivatives	1-tetradecanol	alcohols	531.561	214.393	320.74	FALSE			0.101		0.217864		TRUE	TRUE	TRUE	TRUE	TRUE		0.672936	0.127111	0.836101	0.265273	0.658296	0.133592	0.826886	0.276566	0.946986	2.1321e-07	0.97792	5.28628e-07	0.950375	1.7376e-07	0.979374	4.30816e-07		3	3	4	3	3	4
8	4	vale-2010	im-12,1	imidazolium	ntf2	NTf2 derivatives	1-tetradecanol	alcohols	531.561	214.393	320.81	FALSE			0.143		0.292642		TRUE	TRUE	TRUE	TRUE	TRUE		0.672287	0.127428	0.835697	0.265829	0.657618	0.133941	0.826454	0.277169	0.946914	2.1395e-07	0.977889	5.30462e-07	0.950306	1.7437e-07	0.979345	4.32329e-07		3	3	4	3	3	4
8	4	vale-2010	im-12,1	imidazolium	ntf2	NTf2 derivatives	1-tetradecanol	alcohols	531.561	214.393	320.83	FALSE		0.147		0.299366			TRUE	TRUE	TRUE	TRUE	TRUE		0.672101	0.127519	0.835581	0.265988	0.657424	0.134041	0.826331	0.277342	0.946893	2.1416e-07	0.97788	5.30983e-07	0.950287	1.7454e-07	0.979336	4.3275e-07		3	3	4	3	3	4
8	4	vale-2010	im-12,1	imidazolium	ntf2	NTf2 derivatives	1-tetradecanol	alcohols	531.561	214.393	320.6	FALSE		0.192		0.370736			TRUE	TRUE	TRUE	TRUE	TRUE		0.674229	0.126481	0.836905	0.264166	0.659644	0.132896	0.827743	0.275363	0.94713	2.1173e-07	0.977982	5.24958e-07	0.950513	1.7256e-07	0.979433	4.27841e-07		3	3	4	3	3	4
8	4	vale-2010	im-12,1	imidazolium	ntf2	NTf2 derivatives	1-tetradecanol	alcohols	531.561	214.393	319.9	FALSE		0.24		0.439135			TRUE	TRUE	TRUE	TRUE	TRUE		0.680604	0.123397	0.840848	0.258719	0.666296	0.129502	0.831946	0.269461	0.947847	2.045e-07	0.97829	5.07032e-07	0.951198	1.6664e-07	0.979727	4.13163e-07		3	3	4	3	3	4
8	4	vale-2010	im-12,1	imidazolium	ntf2	NTf2 derivatives	1-tetradecanol	alcohols	531.561	214.393	318.44	FALSE		0.288		0.500722			TRUE	TRUE	TRUE	TRUE	TRUE		0.693442	0.117299	0.848678	0.247823	0.679685	0.122821	0.840283	0.257696	0.949319	1.9014e-07	0.978922	4.71429e-07	0.952605	1.5489e-07	0.980328	3.84031e-07		3	3	4	3	3	4
8	4	vale-2010	im-12,1	imidazolium	ntf2	NTf2 derivatives	1-tetradecanol	alcohols	531.561	214.393	316.44	FALSE		0.33		0.54979			TRUE	TRUE	TRUE	TRUE	TRUE		0.710104	0.109602	0.858622	0.233831	0.697052	0.114439	0.850853	0.242656	0.951289	1.7193e-07	0.979766	4.26279e-07	0.954486	1.4001e-07	0.981131	3.47137e-07		3	3	4	3	3	4
8	4	vale-2010	im-12,1	imidazolium	ntf2	NTf2 derivatives	1-tetradecanol	alcohols	531.561	214.393	314.65	FALSE		0.355		0.577099			TRUE	TRUE	TRUE	TRUE	TRUE		0.72419	0.10328	0.866846	0.22213	0.711728	0.107592	0.859579	0.230131	0.953006	1.5698e-07	0.980499	3.89212e-07	0.956124	1.2778e-07	0.981828	3.16815e-07		3	3	4	3	3	4
8	4	vale-2010	im-12,1	imidazolium	ntf2	NTf2 derivatives	1-tetradecanol	alcohols	531.561	214.393	313.55	FALSE		0.387		0.61018			TRUE	TRUE	TRUE	TRUE	TRUE		0.732489	0.09963	0.871613	0.215289	0.720373	0.103655	0.864634	0.22283	0.954039	1.4839e-07	0.98094	3.67915e-07	0.95711	1.2076e-07	0.982247	2.99409e-07		3	3	4	3	3	4
8	5	vale-2010	im-12,1	imidazolium	ntf2	NTf2 derivatives	1-hexadecanol	alcohols	531.561	242.447	322.75	FALSE			0.02		0.0428282		TRUE	TRUE	TRUE	TRUE	TRUE		0.781545	0.104505	0.886927	0.203735	0.774658	0.10724	0.882864	0.208463	0.96796	1.4722e-07	0.985127	3.22777e-07	0.971386	1.0431e-07	0.986743	2.28698e-07		3	3	4	3	3	4
8	5	vale-2010	im-12,1	imidazolium	ntf2	NTf2 derivatives	1-hexadecanol	alcohols	531.561	242.447	327.74	FALSE			0.027		0.0573505		TRUE	TRUE	TRUE	TRUE	TRUE		0.749111	0.121784	0.867486	0.233151	0.741353	0.125409	0.862718	0.239187	0.9645	1.8851e-07	0.983489	4.13305e-07	0.968178	1.3399e-07	0.98523	2.93771e-07		3	3	4	3	3	4
8	5	vale-2010	im-12,1	imidazolium	ntf2	NTf2 derivatives	1-hexadecanol	alcohols	531.561	242.447	330.75	FALSE			0.056		0.115093		TRUE	TRUE	TRUE	TRUE	TRUE		0.727125	0.133992	0.85385	0.253301	0.718778	0.138322	0.848572	0.260328	0.96229	2.1817e-07	0.98244	4.78334e-07	0.966123	1.5535e-07	0.984259	3.40602e-07		3	3	4	3	3	4
8	5	vale-2010	im-12,1	imidazolium	ntf2	NTf2 derivatives	1-hexadecanol	alcohols	531.561	242.447	332.25	FALSE			0.082		0.16377		TRUE	TRUE	TRUE	TRUE	TRUE		0.715373	0.140687	0.846402	0.26414	0.706711	0.145437	0.840841	0.27174	0.961153	2.3446e-07	0.981899	5.14049e-07	0.965065	1.671e-07	0.983757	3.66364e-07		3	3	4	3	3	4
8	5	vale-2010	im-12,1	imidazolium	ntf2	NTf2 derivatives	1-hexadecanol	alcohols	531.561	242.447	333.14	FALSE		0.124		0.236846			TRUE	TRUE	TRUE	TRUE	TRUE		0.708123	0.144879	0.841752	0.270851	0.699266	0.149905	0.836011	0.278823	0.960467	2.4463e-07	0.981573	5.36347e-07	0.964426	1.7443e-07	0.983455	3.82435e-07		3	3	4	3	3	4
8	5	vale-2010	im-12,1	imidazolium	ntf2	NTf2 derivatives	1-hexadecanol	alcohols	531.561	242.447	333	FALSE		0.169		0.308382			TRUE	TRUE	TRUE	TRUE	TRUE		0.709278	0.144208	0.842495	0.26978	0.700452	0.149189	0.836783	0.277692	0.960576	2.4301e-07	0.981624	5.32795e-07	0.964527	1.7326e-07	0.983502	3.7987e-07		3	3	4	3	3	4
8	5	vale-2010	im-12,1	imidazolium	ntf2	NTf2 derivatives	1-hexadecanol	alcohols	531.561	242.447	332.55	FALSE		0.221		0.383478			TRUE	TRUE	TRUE	TRUE	TRUE		0.712953	0.142081	0.844855	0.266378	0.704226	0.146922	0.839234	0.274101	0.960923	2.3785e-07	0.98179	5.21482e-07	0.964851	1.6954e-07	0.983656	3.71714e-07		3	3	4	3	3	4
8	5	vale-2010	im-12,1	imidazolium	ntf2	NTf2 derivatives	1-hexadecanol	alcohols	531.561	242.447	332.33	FALSE		0.231		0.397082			TRUE	TRUE	TRUE	TRUE	TRUE		0.71473	0.141057	0.845992	0.264735	0.706051	0.145831	0.840414	0.272367	0.961092	2.3536e-07	0.98187	5.16023e-07	0.965008	1.6774e-07	0.98373	3.67767e-07		3	3	4	3	3	4
8	5	vale-2010	im-12,1	imidazolium	ntf2	NTf2 derivatives	1-hexadecanol	alcohols	531.561	242.447	330.45	FALSE		0.298		0.482056			TRUE	TRUE	TRUE	TRUE	TRUE		0.729408	0.132704	0.855283	0.251199	0.721123	0.136956	0.85006	0.258119	0.962514	2.1504e-07	0.982547	4.71471e-07	0.966332	1.5309e-07	0.984357	3.35647e-07		3	3	4	3	3	4
8	5	vale-2010	im-12,1	imidazolium	ntf2	NTf2 derivatives	1-hexadecanol	alcohols	531.561	242.447	325.98	FALSE		0.392		0.585677			TRUE	TRUE	TRUE	TRUE	TRUE		0.761082	0.115309	0.874753	0.222252	0.753644	0.118586	0.87025	0.227786	0.965749	1.7289e-07	0.984082	3.79058e-07	0.969337	1.2275e-07	0.985777	2.69127e-07		3	3	4	3	3	4
8	5	vale-2010	im-12,1	imidazolium	ntf2	NTf2 derivatives	1-hexadecanol	alcohols	531.561	242.447	330.12	FALSE		0.334		0.523704			TRUE	TRUE	TRUE	TRUE	TRUE		0.731896	0.131307	0.856841	0.248913	0.723677	0.135476	0.851676	0.255717	0.96276	2.1164e-07	0.982664	4.64017e-07	0.966561	1.5064e-07	0.984466	3.30276e-07		3	3	4	3	3	4
8	6	vale-2010	im-12,1	imidazolium	ntf2	NTf2 derivatives	1-octadecanol	alcohols	531.561	270.501	334.65	FALSE			0.029		0.0554363		TRUE	TRUE	TRUE	TRUE	TRUE		0.80746	0.11922	0.891788	0.210104	0.798382	0.12595	0.886125	0.220679	0.975961	1.6084e-07	0.987621	3.16066e-07	0.976843	1.2923e-07	0.98808	2.5395e-07		3	3	4	3	3	4
8	6	vale-2010	im-12,1	imidazolium	ntf2	NTf2 derivatives	1-octadecanol	alcohols	531.561	270.501	340.25	FALSE			0.055		0.102633		TRUE	TRUE	TRUE	TRUE	TRUE		0.775761	0.139913	0.871767	0.242233	0.765563	0.148235	0.865176	0.254839	0.972961	2.1112e-07	0.986055	4.14871e-07	0.973927	1.6956e-07	0.98656	3.33202e-07		3	3	4	3	3	4
8	6	vale-2010	im-12,1	imidazolium	ntf2	NTf2 derivatives	1-octadecanol	alcohols	531.561	270.501	342.35	FALSE			0.1		0.179214		TRUE	TRUE	TRUE	TRUE	TRUE		0.762508	0.148789	0.863188	0.255671	0.751849	0.157856	0.856195	0.269192	0.971773	2.333e-07	0.985434	4.58457e-07	0.972772	1.8735e-07	0.985957	3.68161e-07		3	3	4	3	3	4
8	6	vale-2010	im-12,1	imidazolium	ntf2	NTf2 derivatives	1-octadecanol	alcohols	531.561	270.501	342.75	FALSE		0.152		0.260483			TRUE	TRUE	TRUE	TRUE	TRUE		0.759888	0.150559	0.861477	0.258328	0.749137	0.15978	0.854403	0.272035	0.971542	2.3775e-07	0.985313	4.67202e-07	0.972549	1.9092e-07	0.98584	3.75176e-07		3	3	4	3	3	4
8	6	vale-2010	im-12,1	imidazolium	ntf2	NTf2 derivatives	1-octadecanol	alcohols	531.561	270.501	342.65	FALSE		0.199		0.328051			TRUE	TRUE	TRUE	TRUE	TRUE		0.760546	0.150114	0.861907	0.25766	0.749819	0.159297	0.854854	0.271321	0.9716	2.3663e-07	0.985343	4.65001e-07	0.972605	1.9002e-07	0.985869	3.73408e-07		3	3	4	3	3	4
8	6	vale-2010	im-12,1	imidazolium	ntf2	NTf2 derivatives	1-octadecanol	alcohols	531.561	270.501	341.85	FALSE		0.257		0.404662			TRUE	TRUE	TRUE	TRUE	TRUE		0.765739	0.146612	0.865291	0.252395	0.755191	0.155492	0.858396	0.265687	0.972059	2.2784e-07	0.985583	4.47728e-07	0.97305	1.8297e-07	0.986102	3.59554e-07		3	3	4	3	3	4
8	6	vale-2010	im-12,1	imidazolium	ntf2	NTf2 derivatives	1-octadecanol	alcohols	531.561	270.501	341.15	FALSE		0.278		0.430733			TRUE	TRUE	TRUE	TRUE	TRUE		0.770182	0.143633	0.868171	0.24789	0.759789	0.152262	0.861411	0.260875	0.972456	2.2038e-07	0.985791	4.33068e-07	0.973436	1.7699e-07	0.986304	3.47803e-07		3	3	4	3	3	4
8	6	vale-2010	im-12,1	imidazolium	ntf2	NTf2 derivatives	1-octadecanol	alcohols	531.561	270.501	338.85	FALSE		0.347		0.510821			TRUE	TRUE	TRUE	TRUE	TRUE		0.784157	0.134359	0.877138	0.233722	0.774252	0.142235	0.870797	0.245769	0.973734	1.9739e-07	0.986459	3.87891e-07	0.974678	1.5855e-07	0.986952	3.11566e-07		3	3	4	3	3	4
8	6	vale-2010	im-12,1	imidazolium	ntf2	NTf2 derivatives	1-octadecanol	alcohols	531.561	270.501	336.85	FALSE		0.382		0.548466			TRUE	TRUE	TRUE	TRUE	TRUE		0.79559	0.126882	0.884372	0.222134	0.786089	0.13418	0.878366	0.233447	0.974811	1.7915e-07	0.987021	3.52047e-07	0.975726	1.4392e-07	0.987498	2.82817e-07		3	3	4	3	3	4
8	6	vale-2010	im-12,1	imidazolium	ntf2	NTf2 derivatives	1-octadecanol	alcohols	531.561	270.501	332.15	FALSE		0.452		0.618444			TRUE	TRUE	TRUE	TRUE	TRUE		0.820126	0.111157	0.899596	0.197271	0.811507	0.11731	0.894294	0.207081	0.977222	1.4206e-07	0.988278	2.79162e-07	0.978069	1.1416e-07	0.988718	2.24336e-07		3	3	4	3	3	4
8	7	vale-2010	im-12,1	imidazolium	ntf2	NTf2 derivatives	1-eicosanol	alcohols	531.561	298.555	343.85	FALSE			0.033		0.0572795		TRUE	TRUE	TRUE	TRUE	TRUE		0.840551	0.127008	0.903715	0.205738	0.830312	0.136524	0.897035	0.219668	0.982645	1.5382e-07	0.990178	2.73868e-07	0.982857	1.394e-07	0.990298	2.48194e-07		3	3	4	3	3	4
8	7	vale-2010	im-12,1	imidazolium	ntf2	NTf2 derivatives	1-eicosanol	alcohols	531.561	298.555	348.65	FALSE			0.054		0.092256		TRUE	TRUE	TRUE	TRUE	TRUE		0.819018	0.143902	0.889591	0.230341	0.807582	0.15488	0.881972	0.246018	0.980784	1.9304e-07	0.989116	3.43697e-07	0.98101	1.7473e-07	0.989245	3.11097e-07		3	3	4	3	3	4
8	7	vale-2010	im-12,1	imidazolium	ntf2	NTf2 derivatives	1-eicosanol	alcohols	531.561	298.555	350.85	FALSE			0.096		0.159009		TRUE	TRUE	TRUE	TRUE	TRUE		0.80821	0.152477	0.882393	0.242606	0.796168	0.164238	0.874284	0.259193	0.979887	2.1382e-07	0.988603	3.80695e-07	0.98012	1.9342e-07	0.988736	3.44374e-07		3	3	4	3	3	4
8	7	vale-2010	im-12,1	imidazolium	ntf2	NTf2 derivatives	1-eicosanol	alcohols	531.561	298.555	351.65	FALSE		0.151		0.240505			TRUE	TRUE	TRUE	TRUE	TRUE		0.804118	0.155739	0.879648	0.247235	0.791846	0.167807	0.87135	0.264174	0.979554	2.2185e-07	0.988412	3.94992e-07	0.97979	2.0065e-07	0.988547	3.57246e-07		3	3	4	3	3	4
8	7	vale-2010	im-12,1	imidazolium	ntf2	NTf2 derivatives	1-eicosanol	alcohols	531.561	298.555	351.55	FALSE		0.187		0.290541			TRUE	TRUE	TRUE	TRUE	TRUE		0.804635	0.155328	0.879995	0.246652	0.792392	0.167357	0.871721	0.263547	0.979595	2.2083e-07	0.988436	3.93176e-07	0.979831	1.9973e-07	0.988571	3.55608e-07		3	3	4	3	3	4
8	7	vale-2010	im-12,1	imidazolium	ntf2	NTf2 derivatives	1-eicosanol	alcohols	531.561	298.555	350.95	FALSE		0.255		0.378656			TRUE	TRUE	TRUE	TRUE	TRUE		0.807704	0.15288	0.882054	0.24318	0.795633	0.164679	0.873922	0.259811	0.979845	2.148e-07	0.988579	3.8244e-07	0.980079	1.9431e-07	0.988713	3.45958e-07		3	3	4	3	3	4
8	7	vale-2010	im-12,1	imidazolium	ntf2	NTf2 derivatives	1-eicosanol	alcohols	531.561	298.555	350.35	FALSE		0.292		0.423401			TRUE	TRUE	TRUE	TRUE	TRUE		0.810723	0.150478	0.884073	0.23976	0.798822	0.162053	0.876079	0.256133	0.980093	2.0893e-07	0.988721	3.71988e-07	0.980325	1.8903e-07	0.988853	3.36558e-07		3	3	4	3	3	4
8	7	vale-2010	im-12,1	imidazolium	ntf2	NTf2 derivatives	1-eicosanol	alcohols	531.561	298.555	348.45	FALSE		0.339		0.477293			TRUE	TRUE	TRUE	TRUE	TRUE		0.81997	0.14315	0.890222	0.229258	0.808587	0.154061	0.882645	0.244856	0.980864	1.9125e-07	0.989161	3.4051e-07	0.98109	1.7311e-07	0.98929	3.08213e-07		3	3	4	3	3	4
8	7	vale-2010	im-12,1	imidazolium	ntf2	NTf2 derivatives	1-eicosanol	alcohols	531.561	298.555	344.45	FALSE		0.415		0.558119			TRUE	TRUE	TRUE	TRUE	TRUE		0.838002	0.128996	0.902058	0.208663	0.827622	0.138679	0.895269	0.222797	0.98242	1.583e-07	0.990049	2.81845e-07	0.982633	1.4343e-07	0.990171	2.55369e-07		3	3	4	3	3	4
8	7	vale-2010	im-12,1	imidazolium	ntf2	NTf2 derivatives	1-eicosanol	alcohols	531.561	298.555	341.75	FALSE		0.457		0.599753			TRUE	TRUE	TRUE	TRUE	TRUE		0.849179	0.12031	0.909293	0.195818	0.83942	0.12927	0.90298	0.209066	0.983418	1.3902e-07	0.990618	2.47518e-07	0.983624	1.2604e-07	0.990736	2.24407e-07		3	3	4	3	3	4
8	8	ferreira-2008	im-12,1	imidazolium	ntf2	NTf2 derivatives	ethanol	alcohols	531.561	46.069	285.8	FALSE		0.273		0.812483			TRUE	TRUE	TRUE	TRUE	TRUE																			3	3	2	3	3	2
8	8	ferreira-2008	im-12,1	imidazolium	ntf2	NTf2 derivatives	ethanol	alcohols	531.561	46.069	285.2	FALSE		0.393		0.881943			TRUE	TRUE	TRUE	TRUE	TRUE																			3	3	2	3	3	2
8	9	ferreira-2008	im-12,1	imidazolium	ntf2	NTf2 derivatives	3,3,4,4,5,5,6,6,7,7,8,8,8-tridecafluoro-1-octanol	alcohols	531.561	364.106	273.7	FALSE			0.06		0.0852422		TRUE	TRUE	TRUE	TRUE	TRUE		0.872624	0.0312549	0.909103	0.0449827	0.883954	0.0271272	0.917495	0.0391151	0.974324	3.7423e-09	0.982269	5.46341e-09	0.975189	3.5818e-09	0.982871	5.2291e-09		3	3	10	3	3	10
8	9	ferreira-2008	im-12,1	imidazolium	ntf2	NTf2 derivatives	3,3,4,4,5,5,6,6,7,7,8,8,8-tridecafluoro-1-octanol	alcohols	531.561	364.106	283.2	FALSE			0.136		0.18686		TRUE	TRUE	TRUE	TRUE	TRUE		0.836097	0.0404352	0.881618	0.0579539	0.84975	0.0352184	0.891969	0.050596	0.967096	7.4682e-09	0.977226	1.09029e-08	0.968133	7.1562e-09	0.977951	1.04474e-08		3	3	10	3	3	10
8	9	ferreira-2008	im-12,1	imidazolium	ntf2	NTf2 derivatives	3,3,4,4,5,5,6,6,7,7,8,8,8-tridecafluoro-1-octanol	alcohols	531.561	364.106	284.8	FALSE			0.199		0.266162		TRUE	TRUE	TRUE	TRUE	TRUE		0.82915	0.042245	0.876315	0.0604984	0.843227	0.0368144	0.887035	0.0528508	0.965741	8.3547e-09	0.976278	1.21971e-08	0.966808	8.0074e-09	0.977024	1.16901e-08		3	3	10	3	3	10
8	9	ferreira-2008	im-12,1	imidazolium	ntf2	NTf2 derivatives	3,3,4,4,5,5,6,6,7,7,8,8,8-tridecafluoro-1-octanol	alcohols	531.561	364.106	282	FALSE		0.533		0.624939			TRUE	TRUE	TRUE	TRUE	TRUE		0.841148	0.0391323	0.885459	0.0561196	0.854491	0.0340695	0.895542	0.048971	0.968085	6.8602e-09	0.977917	1.00153e-08	0.969101	6.5727e-09	0.978627	9.59553e-09		3	3	10	3	3	10
8	9	ferreira-2008	im-12,1	imidazolium	ntf2	NTf2 derivatives	3,3,4,4,5,5,6,6,7,7,8,8,8-tridecafluoro-1-octanol	alcohols	531.561	364.106	277.2	FALSE		0.623		0.706962			TRUE	TRUE	TRUE	TRUE	TRUE		0.860063	0.0343515	0.899726	0.0493701	0.872214	0.029855	0.908798	0.0429952	0.971819	4.8517e-09	0.980524	7.08303e-09	0.972747	4.6456e-09	0.981171	6.78215e-09		3	3	10	3	3	10
8	9	ferreira-2008	im-12,1	imidazolium	ntf2	NTf2 derivatives	3,3,4,4,5,5,6,6,7,7,8,8,8-tridecafluoro-1-octanol	alcohols	531.561	364.106	267.3	FALSE		0.739		0.805205			TRUE	TRUE	TRUE	TRUE	TRUE		0.89314	0.0263174	0.924254	0.0379615	0.903073	0.0227844	0.931517	0.0329182	0.978456	2.2909e-09	0.985142	3.3445e-09	0.979209	2.1911e-09	0.985665	3.1988e-09		3	3	10	3	3	10
9	1	domanska-2006b	im-1o4,1o4	imidazolium	bf4	BF4 derivatives	ethanol	alcohols	328.154	46.069	257	FALSE			0.05		0.272674		TRUE	TRUE	FALSE	TRUE	FALSE														0.074781	4.8234e-05	0.365372	0.000343474		9	1	2	9	1	2
9	1	domanska-2006b	im-1o4,1o4	imidazolium	bf4	BF4 derivatives	ethanol	alcohols	328.154	46.069	259.8	FALSE			0.094		0.42497		TRUE	TRUE	FALSE	TRUE	FALSE														0.0725731	5.3649e-05	0.357903	0.000382022		9	1	2	9	1	2
9	1	domanska-2006b	im-1o4,1o4	imidazolium	bf4	BF4 derivatives	ethanol	alcohols	328.154	46.069	260.3	FALSE		0.109		0.465641			TRUE	TRUE	FALSE	TRUE	FALSE														0.0721617	5.4677e-05	0.356496	0.000389339		9	1	2	9	1	2
9	1	domanska-2006b	im-1o4,1o4	imidazolium	bf4	BF4 derivatives	ethanol	alcohols	328.154	46.069	260.2	FALSE		0.125		0.504358			TRUE	TRUE	FALSE	TRUE	FALSE														0.0722441	5.447e-05	0.356778	0.000387866		9	1	2	9	1	2
9	1	domanska-2006b	im-1o4,1o4	imidazolium	bf4	BF4 derivatives	ethanol	alcohols	328.154	46.069	260	FALSE		0.146		0.549096			TRUE	TRUE	FALSE	TRUE	FALSE														0.0724084	5.4058e-05	0.357341	0.000384933		9	1	2	9	1	2
9	1	domanska-2006b	im-1o4,1o4	imidazolium	bf4	BF4 derivatives	ethanol	alcohols	328.154	46.069	258.8	FALSE		0.17		0.593322			TRUE	TRUE	FALSE	TRUE	FALSE														0.0733801	5.165e-05	0.360649	0.000367792		9	1	2	9	1	2
9	1	domanska-2006b	im-1o4,1o4	imidazolium	bf4	BF4 derivatives	ethanol	alcohols	328.154	46.069	255.4	FALSE		0.194		0.631607			TRUE	TRUE	FALSE	TRUE	FALSE														0.0759662	4.5384e-05	0.369324	0.000323185		9	1	2	9	1	2
9	2	domanska-2006b	im-1o4,1o4	imidazolium	bf4	BF4 derivatives	1-octanol	alcohols	328.154	130.231	271.7	FALSE			0.012		0.0296958		TRUE	TRUE	TRUE	TRUE	TRUE		0.934249	0.00548043	0.972829	0.0136954	0.942049	0.00477746	0.976169	0.0119514	0.961349	1.527e-08	0.984295	3.84771e-08	0.962916	1.6068e-08	0.984946	4.04879e-08		9	1	9	9	1	9
9	2	domanska-2006b	im-1o4,1o4	imidazolium	bf4	BF4 derivatives	1-octanol	alcohols	328.154	130.231	273.3	FALSE			0.044		0.103921		TRUE	TRUE	TRUE	TRUE	TRUE		0.931891	0.00576561	0.971812	0.0144019	0.939817	0.00503749	0.975216	0.0125969	0.959997	1.6977e-08	0.983732	4.27784e-08	0.961721	1.7778e-08	0.98445	4.47967e-08		9	1	9	9	1	9
9	2	domanska-2006b	im-1o4,1o4	imidazolium	bf4	BF4 derivatives	1-octanol	alcohols	328.154	130.231	273	FALSE		0.065		0.149061			TRUE	TRUE	TRUE	TRUE	TRUE		0.932338	0.00571116	0.972005	0.0142671	0.940241	0.0049878	0.975397	0.0124736	0.960253	1.6644e-08	0.983839	4.19393e-08	0.961947	1.7445e-08	0.984544	4.39576e-08		9	1	9	9	1	9
9	2	domanska-2006b	im-1o4,1o4	imidazolium	bf4	BF4 derivatives	1-octanol	alcohols	328.154	130.231	272.9	FALSE		0.077		0.173697			TRUE	TRUE	TRUE	TRUE	TRUE		0.932486	0.00569311	0.972069	0.0142224	0.940381	0.00497134	0.975457	0.0124328	0.960339	1.6534e-08	0.983874	4.16621e-08	0.962023	1.7335e-08	0.984575	4.36805e-08		9	1	9	9	1	9
9	2	domanska-2006b	im-1o4,1o4	imidazolium	bf4	BF4 derivatives	1-octanol	alcohols	328.154	130.231	273	FALSE		0.08		0.179731			TRUE	TRUE	TRUE	TRUE	TRUE		0.932338	0.00571116	0.972005	0.0142671	0.940241	0.0049878	0.975397	0.0124736	0.960253	1.6644e-08	0.983839	4.19393e-08	0.961947	1.7445e-08	0.984544	4.39576e-08		9	1	9	9	1	9
9	2	domanska-2006b	im-1o4,1o4	imidazolium	bf4	BF4 derivatives	1-octanol	alcohols	328.154	130.231	272.7	FALSE		0.11		0.237476			TRUE	TRUE	TRUE	TRUE	TRUE		0.932783	0.00565716	0.972197	0.0141333	0.940662	0.00493855	0.975577	0.0123514	0.960508	1.6317e-08	0.983945	4.11153e-08	0.962173	1.7118e-08	0.984637	4.31337e-08		9	1	9	9	1	9
9	2	domanska-2006b	im-1o4,1o4	imidazolium	bf4	BF4 derivatives	1-octanol	alcohols	328.154	130.231	272.5	FALSE		0.135		0.282259			TRUE	TRUE	TRUE	TRUE	TRUE		0.933078	0.00562142	0.972324	0.0140448	0.940941	0.00490595	0.975696	0.0122704	0.960678	1.6103e-08	0.984015	4.05761e-08	0.962323	1.6903e-08	0.9847	4.25919e-08		9	1	9	9	1	9
9	2	domanska-2006b	im-1o4,1o4	imidazolium	bf4	BF4 derivatives	1-octanol	alcohols	328.154	130.231	271.9	FALSE		0.169		0.33882			TRUE	TRUE	TRUE	TRUE	TRUE		0.933958	0.00551538	0.972703	0.013782	0.941774	0.0048093	0.976051	0.0120305	0.961182	1.5474e-08	0.984225	3.89911e-08	0.962768	1.6273e-08	0.984885	4.10044e-08		9	1	9	9	1	9
9	2	domanska-2006b	im-1o4,1o4	imidazolium	bf4	BF4 derivatives	1-octanol	alcohols	328.154	130.231	271.4	FALSE		0.202		0.38944			TRUE	TRUE	TRUE	TRUE	TRUE		0.934684	0.00542838	0.973016	0.0135664	0.94246	0.00473005	0.976344	0.0118336	0.961598	1.4968e-08	0.984399	3.77161e-08	0.963136	1.5765e-08	0.985038	3.97244e-08		9	1	9	9	1	9
9	2	domanska-2006b	im-1o4,1o4	imidazolium	bf4	BF4 derivatives	1-octanol	alcohols	328.154	130.231	271	FALSE		0.239		0.441766			TRUE	TRUE	TRUE	TRUE	TRUE		0.935261	0.00535966	0.973264	0.0133961	0.943005	0.00466749	0.976576	0.0116782	0.961929	1.4574e-08	0.984536	3.67233e-08	0.963428	1.5369e-08	0.985159	3.87266e-08		9	1	9	9	1	9
9	3	domanska-2006b	im-1o4,1o4	imidazolium	bf4	BF4 derivatives	benzene	aromatics	328.154	78.114	278.6	FALSE		0.115		0.353123			TRUE	TRUE	TRUE	TRUE	TRUE		0.511255	0.00519529	0.814624	0.0214682	0.510889	0.0052519	0.814403	0.0216983	0.457534	1.4269e-08	0.779892	5.99435e-08	0.454834	1.5402e-08	0.778018	6.47032e-08		9	1	1	9	1	1
9	3	domanska-2006b	im-1o4,1o4	imidazolium	bf4	BF4 derivatives	benzene	aromatics	328.154	78.114	278.7	FALSE		0.127		0.37932			TRUE	TRUE	TRUE	TRUE	TRUE		0.510959	0.00521216	0.814445	0.0215368	0.510593	0.00526899	0.814224	0.0217677	0.457266	1.4363e-08	0.779707	6.03384e-08	0.454563	1.5505e-08	0.77783	6.51359e-08		9	1	1	9	1	1
9	3	domanska-2006b	im-1o4,1o4	imidazolium	bf4	BF4 derivatives	benzene	aromatics	328.154	78.114	278.6	FALSE		0.157		0.438954			TRUE	TRUE	TRUE	TRUE	TRUE		0.511255	0.00519529	0.814624	0.0214682	0.510889	0.0052519	0.814403	0.0216983	0.457534	1.4269e-08	0.779892	5.99435e-08	0.454834	1.5402e-08	0.778018	6.47032e-08		9	1	1	9	1	1
9	3	domanska-2006b	im-1o4,1o4	imidazolium	bf4	BF4 derivatives	benzene	aromatics	328.154	78.114	278.5	FALSE		0.178		0.476357			TRUE	TRUE	TRUE	TRUE	TRUE		0.51155	0.00517847	0.814803	0.0213998	0.511185	0.00523486	0.814582	0.021629	0.457805	1.4175e-08	0.78008	5.95486e-08	0.455104	1.53e-08	0.778206	6.42747e-08		9	1	1	9	1	1
9	3	domanska-2006b	im-1o4,1o4	imidazolium	bf4	BF4 derivatives	benzene	aromatics	328.154	78.114	278.4	FALSE		0.196		0.505957			TRUE	TRUE	TRUE	TRUE	TRUE		0.511848	0.00516171	0.814982	0.0213317	0.511481	0.00521786	0.814761	0.0215599	0.458073	1.4081e-08	0.780265	5.91538e-08	0.455374	1.5199e-08	0.778394	6.38504e-08		9	1	1	9	1	1
9	3	domanska-2006b	im-1o4,1o4	imidazolium	bf4	BF4 derivatives	benzene	aromatics	328.154	78.114	277.9	FALSE		0.216		0.536481			TRUE	TRUE	TRUE	TRUE	TRUE		0.513322	0.00507852	0.81587	0.0209934	0.512959	0.00513363	0.815652	0.0212175	0.459414	1.3621e-08	0.781189	5.72213e-08	0.456726	1.47e-08	0.779333	6.17541e-08		9	1	1	9	1	1
9	3	domanska-2006b	im-1o4,1o4	imidazolium	bf4	BF4 derivatives	benzene	aromatics	328.154	78.114	277.5	FALSE		0.233		0.560666			TRUE	TRUE	TRUE	TRUE	TRUE		0.514498	0.00501282	0.816576	0.0207261	0.514137	0.00506707	0.81636	0.0209468	0.460486	1.3263e-08	0.781927	5.57174e-08	0.45781	1.4312e-08	0.780083	6.01242e-08		9	1	1	9	1	1
9	3	domanska-2006b	im-1o4,1o4	imidazolium	bf4	BF4 derivatives	benzene	aromatics	328.154	78.114	277.1	FALSE		0.251		0.584683			TRUE	TRUE	TRUE	TRUE	TRUE		0.515671	0.00494784	0.817279	0.0204616	0.515312	0.00500127	0.817064	0.0206791	0.461559	1.2914e-08	0.782662	5.42512e-08	0.458891	1.3933e-08	0.780829	5.8532e-08		9	1	1	9	1	1
9	3	domanska-2006b	im-1o4,1o4	imidazolium	bf4	BF4 derivatives	benzene	aromatics	328.154	78.114	276.5	FALSE		0.274		0.613226			TRUE	TRUE	TRUE	TRUE	TRUE		0.517426	0.00485175	0.818326	0.0200703	0.517068	0.00490395	0.818113	0.0202829	0.463169	1.2406e-08	0.783761	5.21171e-08	0.460514	1.3383e-08	0.781945	5.62215e-08		9	1	1	9	1	1
9	3	domanska-2006b	im-1o4,1o4	imidazolium	bf4	BF4 derivatives	benzene	aromatics	328.154	78.114	274.4	FALSE		0.303		0.646173			TRUE	TRUE	TRUE	TRUE	TRUE		0.52352	0.004528	0.821928	0.0187502	0.52317	0.00457611	0.821722	0.0189465	0.468807	1.0767e-08	0.787576	4.52318e-08	0.466194	1.1607e-08	0.785815	4.87606e-08		9	1	1	9	1	1
9	3	domanska-2006b	im-1o4,1o4	imidazolium	bf4	BF4 derivatives	benzene	aromatics	328.154	78.114	273.5	FALSE		0.318		0.662026			TRUE	TRUE	TRUE	TRUE	TRUE		0.526108	0.00439505	0.823441	0.0182073	0.52576	0.00444149	0.823238	0.018397	0.471222	1.0127e-08	0.789194	4.25431e-08	0.468631	1.0915e-08	0.787458	4.58535e-08		9	1	1	9	1	1
9	3	domanska-2006b	im-1o4,1o4	imidazolium	bf4	BF4 derivatives	benzene	aromatics	328.154	78.114	270.2	FALSE		0.349		0.692509			TRUE	TRUE	TRUE	TRUE	TRUE		0.535475	0.00393578	0.828843	0.0163284	0.535137	0.00397656	0.828651	0.0164954	0.480083	8.0661e-09	0.795044	3.38854e-08	0.47756	8.6839e-09	0.793392	3.64807e-08		9	1	1	9	1	1
9	3	domanska-2006b	im-1o4,1o4	imidazolium	bf4	BF4 derivatives	benzene	aromatics	328.154	78.114	268.6	FALSE		0.365		0.707151			TRUE	TRUE	TRUE	TRUE	TRUE		0.539947	0.0037283	0.83138	0.0154777	0.539614	0.00376656	0.831192	0.0156347	0.484378	7.211e-09	0.797833	3.02931e-08	0.481891	7.7594e-09	0.796222	3.25969e-08		9	1	1	9	1	1
9	3	domanska-2006b	im-1o4,1o4	imidazolium	bf4	BF4 derivatives	benzene	aromatics	328.154	78.114	267.2	FALSE		0.384		0.723664			TRUE	TRUE	TRUE	TRUE	TRUE		0.543825	0.00355448	0.833559	0.0147643	0.543496	0.00359065	0.833375	0.0149128	0.488138	6.5313e-09	0.80025	2.74377e-08	0.485681	7.0249e-09	0.798673	2.95113e-08		9	1	1	9	1	1
9	3	domanska-2006b	im-1o4,1o4	imidazolium	bf4	BF4 derivatives	benzene	aromatics	328.154	78.114	266.6	FALSE		0.39		0.728693			TRUE	TRUE	TRUE	TRUE	TRUE		0.545475	0.00348211	0.83448	0.014467	0.545148	0.00351742	0.834298	0.014612	0.489748	6.2582e-09	0.801278	2.62905e-08	0.487304	6.7299e-09	0.799716	2.82721e-08		9	1	1	9	1	1
9	3	domanska-2006b	im-1o4,1o4	imidazolium	bf4	BF4 derivatives	benzene	aromatics	328.154	78.114	265.4	FALSE		0.402		0.738498			TRUE	TRUE	TRUE	TRUE	TRUE		0.548758	0.00334114	0.836302	0.0138875	0.548433	0.00337478	0.836123	0.0140258	0.492968	5.743e-09	0.803321	2.41261e-08	0.49055	6.1734e-09	0.801788	2.59342e-08		9	1	1	9	1	1
9	3	domanska-2006b	im-1o4,1o4	imidazolium	bf4	BF4 derivatives	benzene	aromatics	328.154	78.114	262.8	FALSE		0.426		0.757151			TRUE	TRUE	TRUE	TRUE	TRUE		0.555785	0.00305222	0.840156	0.0126982	0.555468	0.00308247	0.839983	0.0128228	0.499944	4.7563e-09	0.807693	1.9981e-08	0.497582	5.1085e-09	0.806222	2.14606e-08		9	1	1	9	1	1
9	3	domanska-2006b	im-1o4,1o4	imidazolium	bf4	BF4 derivatives	benzene	aromatics	328.154	78.114	260.8	FALSE		0.452		0.776037			TRUE	TRUE	TRUE	TRUE	TRUE		0.561111	0.00284461	0.843035	0.0118423	0.560796	0.00287246	0.842866	0.0119572	0.505308	4.1049e-09	0.811004	1.72445e-08	0.502987	4.406e-09	0.809577	1.85094e-08		9	1	1	9	1	1
10	1	domanska-2007c	im-1o6,1	imidazolium	bf4	BF4 derivatives	1-butanol	alcohols	284.106	74.123	288.61	FALSE			0.0162		0.0593684		TRUE	TRUE	TRUE	TRUE	TRUE		0.5607	0.0314045	0.830282	0.110536	0.61083	0.0251986	0.857469	0.0901484	0.794402	6.3784e-07	0.936748	2.44477e-06	0.781141	6.338e-07	0.931881	2.42929e-06		6	1	5	6	1	5
10	1	domanska-2007c	im-1o6,1	imidazolium	bf4	BF4 derivatives	1-butanol	alcohols	284.106	74.123	290.14	FALSE			0.0217		0.078357		TRUE	TRUE	TRUE	TRUE	TRUE		0.549736	0.0331214	0.823933	0.116061	0.600323	0.0265943	0.852008	0.0947917	0.789524	6.8765e-07	0.934971	2.63569e-06	0.776388	6.8168e-07	0.930109	2.61281e-06		6	1	5	6	1	5
10	1	domanska-2007c	im-1o6,1	imidazolium	bf4	BF4 derivatives	1-butanol	alcohols	284.106	74.123	291.07	FALSE			0.0279		0.0991049		TRUE	TRUE	TRUE	TRUE	TRUE		0.542949	0.0342176	0.819925	0.119563	0.59384	0.0274847	0.848577	0.0977361	0.78652	7.1965e-07	0.933869	2.75834e-06	0.773463	7.1239e-07	0.929011	2.73051e-06		6	1	5	6	1	5
10	1	domanska-2007c	im-1o6,1	imidazolium	bf4	BF4 derivatives	1-butanol	alcohols	284.106	74.123	291.47	FALSE			0.0325		0.114067		TRUE	TRUE	TRUE	TRUE	TRUE		0.540011	0.0347026	0.818172	0.121106	0.59103	0.0278779	0.847076	0.0990322	0.785221	7.3382e-07	0.933391	2.81265e-06	0.772197	7.2599e-07	0.928534	2.78264e-06		6	1	5	6	1	5
10	1	domanska-2007c	im-1o6,1	imidazolium	bf4	BF4 derivatives	1-butanol	alcohols	284.106	74.123	291.81	FALSE			0.0374		0.129617		TRUE	TRUE	TRUE	TRUE	TRUE		0.537505	0.0351214	0.816666	0.122435	0.58863	0.0282172	0.845786	0.100148	0.784113	7.4608e-07	0.932982	2.85964e-06	0.771117	7.3774e-07	0.928126	2.82768e-06		6	1	5	6	1	5
10	1	domanska-2007c	im-1o6,1	imidazolium	bf4	BF4 derivatives	1-butanol	alcohols	284.106	74.123	292.11	FALSE			0.0437		0.149046		TRUE	TRUE	TRUE	TRUE	TRUE		0.535282	0.0354958	0.815324	0.123621	0.586503	0.0285204	0.844638	0.101144	0.783132	7.5704e-07	0.932619	2.90165e-06	0.770161	7.4825e-07	0.927764	2.86796e-06		6	1	5	6	1	5
10	1	domanska-2007c	im-1o6,1	imidazolium	bf4	BF4 derivatives	1-butanol	alcohols	284.106	74.123	292.24	FALSE			0.0503		0.168749		TRUE	TRUE	TRUE	TRUE	TRUE		0.534316	0.0356595	0.814739	0.124139	0.58558	0.0286529	0.844138	0.101579	0.782706	7.6184e-07	0.932461	2.92005e-06	0.769746	7.5284e-07	0.927607	2.88555e-06		6	1	5	6	1	5
10	1	domanska-2007c	im-1o6,1	imidazolium	bf4	BF4 derivatives	1-butanol	alcohols	284.106	74.123	292.37	FALSE			0.0565		0.186679		TRUE	TRUE	TRUE	TRUE	TRUE		0.533349	0.0358242	0.814152	0.124659	0.584654	0.0287862	0.843635	0.102015	0.782279	7.6666e-07	0.932303	2.93852e-06	0.769329	7.5747e-07	0.927449	2.9033e-06		6	1	5	6	1	5
10	1	domanska-2007c	im-1o6,1	imidazolium	bf4	BF4 derivatives	1-butanol	alcohols	284.106	74.123	292.55	FALSE			0.0665		0.214482		TRUE	TRUE	TRUE	TRUE	TRUE		0.532009	0.0360537	0.813336	0.125384	0.583371	0.0289718	0.842937	0.102623	0.781688	7.7339e-07	0.932084	2.96432e-06	0.768752	7.6391e-07	0.92723	2.92798e-06		6	1	5	6	1	5
10	1	domanska-2007c	im-1o6,1	imidazolium	bf4	BF4 derivatives	1-butanol	alcohols	284.106	74.123	289.23	FALSE		0.2419		0.550163			TRUE	TRUE	TRUE	TRUE	TRUE		0.556282	0.0320874	0.827742	0.11274	0.606596	0.0257541	0.855282	0.0920007	0.792434	6.5761e-07	0.936033	2.52055e-06	0.779224	6.5281e-07	0.931168	2.50215e-06		6	1	5	6	1	5
10	1	domanska-2007c	im-1o6,1	imidazolium	bf4	BF4 derivatives	1-butanol	alcohols	284.106	74.123	291.13	FALSE		0.1921		0.476816			TRUE	TRUE	TRUE	TRUE	TRUE		0.542509	0.0342899	0.819663	0.119793	0.59342	0.0275433	0.848353	0.0979294	0.786326	7.2176e-07	0.933797	2.76643e-06	0.773274	7.1442e-07	0.928939	2.73829e-06		6	1	5	6	1	5
10	1	domanska-2007c	im-1o6,1	imidazolium	bf4	BF4 derivatives	1-butanol	alcohols	284.106	74.123	291.77	FALSE		0.1672		0.434877			TRUE	TRUE	TRUE	TRUE	TRUE		0.5378	0.0350718	0.816844	0.122278	0.588913	0.0281771	0.845939	0.100016	0.784243	7.4462e-07	0.93303	2.85405e-06	0.771244	7.3634e-07	0.928174	2.82231e-06		6	1	5	6	1	5
10	1	domanska-2007c	im-1o6,1	imidazolium	bf4	BF4 derivatives	1-butanol	alcohols	284.106	74.123	292.06	FALSE		0.1385		0.381265			TRUE	TRUE	TRUE	TRUE	TRUE		0.535653	0.0354331	0.815549	0.123422	0.586857	0.0284696	0.84483	0.100977	0.783295	7.552e-07	0.932679	2.8946e-06	0.77032	7.4648e-07	0.927825	2.86118e-06		6	1	5	6	1	5
10	1	domanska-2007c	im-1o6,1	imidazolium	bf4	BF4 derivatives	1-butanol	alcohols	284.106	74.123	292.21	FALSE		0.1215		0.34645			TRUE	TRUE	TRUE	TRUE	TRUE		0.53454	0.0356217	0.814874	0.124019	0.585793	0.0286223	0.844253	0.101478	0.782804	7.6073e-07	0.932498	2.9158e-06	0.769842	7.5178e-07	0.927643	2.88149e-06		6	1	5	6	1	5
10	1	domanska-2007c	im-1o6,1	imidazolium	bf4	BF4 derivatives	1-butanol	alcohols	284.106	74.123	292.32	FALSE		0.1066		0.313818			TRUE	TRUE	TRUE	TRUE	TRUE		0.533721	0.0357607	0.814378	0.124459	0.58501	0.0287348	0.843829	0.101847	0.782443	7.6481e-07	0.932364	2.93143e-06	0.76949	7.5569e-07	0.92751	2.89648e-06		6	1	5	6	1	5
10	1	domanska-2007c	im-1o6,1	imidazolium	bf4	BF4 derivatives	1-butanol	alcohols	284.106	74.123	292.5	FALSE		0.0912		0.27779			TRUE	TRUE	TRUE	TRUE	TRUE		0.532382	0.0359898	0.813563	0.125182	0.583727	0.0289201	0.843131	0.102454	0.781852	7.7152e-07	0.932145	2.95715e-06	0.768913	7.6211e-07	0.927291	2.92108e-06		6	1	5	6	1	5
10	1	domanska-2007c	im-1o6,1	imidazolium	bf4	BF4 derivatives	1-butanol	alcohols	284.106	74.123	292.55	FALSE		0.0772		0.2428			TRUE	TRUE	TRUE	TRUE	TRUE		0.532009	0.0360537	0.813336	0.125384	0.583371	0.0289718	0.842937	0.102623	0.781688	7.7339e-07	0.932084	2.96432e-06	0.768752	7.6391e-07	0.92723	2.92798e-06		6	1	5	6	1	5
10	2	domanska-2007c	im-1o6,1	imidazolium	bf4	BF4 derivatives	1-hexanol	alcohols	284.106	102.177	300.66	FALSE			0.0114		0.0310674		TRUE	TRUE	TRUE	TRUE	TRUE		0.813956	0.01739	0.924041	0.0469012	0.83027	0.0152918	0.931514	0.0413922	0.899441	1.3466e-07	0.961345	3.74426e-07	0.905056	1.2066e-07	0.963644	3.35498e-07		6	1	10	6	1	10
10	2	domanska-2007c	im-1o6,1	imidazolium	bf4	BF4 derivatives	1-hexanol	alcohols	284.106	102.177	306.04	FALSE			0.0151		0.0408867		TRUE	TRUE	TRUE	TRUE	TRUE		0.794808	0.0203799	0.915041	0.0546827	0.811504	0.0180469	0.922902	0.0486177	0.889235	1.7979e-07	0.957123	4.99911e-07	0.895468	1.6082e-07	0.959709	4.47164e-07		6	1	10	6	1	10
10	2	domanska-2007c	im-1o6,1	imidazolium	bf4	BF4 derivatives	1-hexanol	alcohols	284.106	102.177	308.51	FALSE			0.0178		0.047973		TRUE	TRUE	TRUE	TRUE	TRUE		0.785549	0.0219092	0.910597	0.0586318	0.802395	0.0194614	0.918637	0.0523006	0.884323	2.0476e-07	0.955069	5.69341e-07	0.890839	1.8303e-07	0.957791	5.0892e-07		6	1	10	6	1	10
10	2	domanska-2007c	im-1o6,1	imidazolium	bf4	BF4 derivatives	1-hexanol	alcohols	284.106	102.177	311.1	FALSE			0.0282		0.074662		TRUE	TRUE	TRUE	TRUE	TRUE		0.775513	0.0236293	0.90571	0.0630492	0.79251	0.0210565	0.913943	0.0564324	0.879019	2.3426e-07	0.952836	6.51366e-07	0.88583	2.0928e-07	0.955701	5.81909e-07		6	1	10	6	1	10
10	2	domanska-2007c	im-1o6,1	imidazolium	bf4	BF4 derivatives	1-hexanol	alcohols	284.106	102.177	311.46	FALSE			0.0368		0.0960311		TRUE	TRUE	TRUE	TRUE	TRUE		0.774091	0.0238783	0.905012	0.0636865	0.791108	0.0212878	0.913272	0.0570296	0.87827	2.3866e-07	0.952519	6.63601e-07	0.885121	2.1318e-07	0.955404	5.92753e-07		6	1	10	6	1	10
10	2	domanska-2007c	im-1o6,1	imidazolium	bf4	BF4 derivatives	1-hexanol	alcohols	284.106	102.177	286.65	FALSE		0.5071		0.740975			TRUE	TRUE	TRUE	TRUE	TRUE		0.857589	0.011409	0.943643	0.0310914	0.872688	0.00983708	0.950149	0.0268814	0.92288	6.1041e-08	0.970824	1.69726e-07	0.926915	5.5067e-08	0.972425	1.53115e-07		6	1	10	6	1	10
10	2	domanska-2007c	im-1o6,1	imidazolium	bf4	BF4 derivatives	1-hexanol	alcohols	284.106	102.177	297.49	FALSE		0.4041		0.653448			TRUE	TRUE	TRUE	TRUE	TRUE		0.824598	0.0158259	0.928936	0.0427984	0.840666	0.0138572	0.936185	0.0376025	0.905139	1.1315e-07	0.963677	3.14617e-07	0.91039	1.0151e-07	0.965811	2.82251e-07		6	1	10	6	1	10
10	2	domanska-2007c	im-1o6,1	imidazolium	bf4	BF4 derivatives	1-hexanol	alcohols	284.106	102.177	300.66	FALSE		0.3457		0.594993			TRUE	TRUE	TRUE	TRUE	TRUE		0.813956	0.01739	0.924041	0.0469012	0.83027	0.0152918	0.931514	0.0413922	0.899441	1.3466e-07	0.961345	3.74426e-07	0.905056	1.2066e-07	0.963644	3.35498e-07		6	1	10	6	1	10
10	2	domanska-2007c	im-1o6,1	imidazolium	bf4	BF4 derivatives	1-hexanol	alcohols	284.106	102.177	303.71	FALSE		0.3011		0.545022			TRUE	TRUE	TRUE	TRUE	TRUE		0.803269	0.0190301	0.919049	0.0511797	0.819808	0.0168013	0.926742	0.0453595	0.893738	1.5879e-07	0.958993	4.4152e-07	0.899704	1.4214e-07	0.961453	3.95224e-07		6	1	10	6	1	10
10	2	domanska-2007c	im-1o6,1	imidazolium	bf4	BF4 derivatives	1-hexanol	alcohols	284.106	102.177	306.04	FALSE		0.2484		0.478882			TRUE	TRUE	TRUE	TRUE	TRUE		0.794808	0.0203799	0.915041	0.0546827	0.811504	0.0180469	0.922902	0.0486177	0.889235	1.7979e-07	0.957123	4.99911e-07	0.895468	1.6082e-07	0.959709	4.47164e-07		6	1	10	6	1	10
10	2	domanska-2007c	im-1o6,1	imidazolium	bf4	BF4 derivatives	1-hexanol	alcohols	284.106	102.177	307.62	FALSE		0.1911		0.39646			TRUE	TRUE	TRUE	TRUE	TRUE		0.788919	0.021346	0.912221	0.0571799	0.805712	0.0189401	0.920197	0.0509453	0.886109	1.9542e-07	0.955818	5.43371e-07	0.892524	1.7473e-07	0.95849	4.85841e-07		6	1	10	6	1	10
10	2	domanska-2007c	im-1o6,1	imidazolium	bf4	BF4 derivatives	1-hexanol	alcohols	284.106	102.177	308.49	FALSE		0.1535		0.335198			TRUE	TRUE	TRUE	TRUE	TRUE		0.785625	0.0218964	0.910633	0.0585988	0.80247	0.0194495	0.918673	0.0522698	0.884363	2.0455e-07	0.955086	5.68757e-07	0.890877	1.8284e-07	0.957806	5.08392e-07		6	1	10	6	1	10
10	2	domanska-2007c	im-1o6,1	imidazolium	bf4	BF4 derivatives	1-hexanol	alcohols	284.106	102.177	309.99	FALSE		0.0985		0.233015			TRUE	TRUE	TRUE	TRUE	TRUE		0.779855	0.0228769	0.907833	0.0611202	0.79679	0.0203584	0.915984	0.0546268	0.881311	2.2118e-07	0.953803	6.14997e-07	0.887996	1.9764e-07	0.956606	5.49543e-07		6	1	10	6	1	10
10	2	domanska-2007c	im-1o6,1	imidazolium	bf4	BF4 derivatives	1-hexanol	alcohols	284.106	102.177	311.04	FALSE		0.0579		0.145947			TRUE	TRUE	TRUE	TRUE	TRUE		0.775748	0.0235879	0.905826	0.0629433	0.792743	0.0210182	0.914055	0.0563335	0.879144	2.3354e-07	0.952889	6.49364e-07	0.885947	2.0863e-07	0.95575	5.80101e-07		6	1	10	6	1	10
10	2	domanska-2007c	im-1o6,1	imidazolium	bf4	BF4 derivatives	1-hexanol	alcohols	284.106	102.177	311.46	FALSE		0.037		0.0965208			TRUE	TRUE	TRUE	TRUE	TRUE		0.774091	0.0238783	0.905012	0.0636865	0.791108	0.0212878	0.913272	0.0570296	0.87827	2.3866e-07	0.952519	6.63601e-07	0.885121	2.1318e-07	0.955404	5.92753e-07		6	1	10	6	1	10
10	3	domanska-2007c	im-1o6,1	imidazolium	bf4	BF4 derivatives	1-octanol	alcohols	284.106	130.231	312.93	FALSE			0.0046		0.0099809		TRUE	TRUE	TRUE	TRUE	TRUE		0.919521	0.0134805	0.961428	0.0289474	0.924946	0.0125855	0.964138	0.0270536	0.953609	5.29e-08	0.978187	1.15404e-07	0.958078	4.9527e-08	0.980337	1.08046e-07		6	1	9	6	1	9
10	3	domanska-2007c	im-1o6,1	imidazolium	bf4	BF4 derivatives	1-octanol	alcohols	284.106	130.231	314.71	FALSE			0.0058		0.0125669		TRUE	TRUE	TRUE	TRUE	TRUE		0.916719	0.0141524	0.960022	0.0303664	0.922198	0.0132364	0.962767	0.0284312	0.951899	5.8511e-08	0.977361	1.27645e-07	0.956506	5.4731e-08	0.979582	1.19399e-07		6	1	9	6	1	9
10	3	domanska-2007c	im-1o6,1	imidazolium	bf4	BF4 derivatives	1-octanol	alcohols	284.106	130.231	316.95	FALSE			0.0108		0.0232639		TRUE	TRUE	TRUE	TRUE	TRUE		0.913095	0.015038	0.958196	0.0322334	0.918636	0.0140956	0.960984	0.0302466	0.949685	6.6327e-08	0.97629	1.44696e-07	0.954465	6.1979e-08	0.978599	1.35211e-07		6	1	9	6	1	9
10	3	domanska-2007c	im-1o6,1	imidazolium	bf4	BF4 derivatives	1-octanol	alcohols	284.106	130.231	318.41	FALSE			0.0133		0.0285658		TRUE	TRUE	TRUE	TRUE	TRUE		0.910672	0.0156399	0.956971	0.0335003	0.916253	0.0146807	0.959787	0.0314807	0.948204	7.1913e-08	0.975572	1.56882e-07	0.953097	6.7158e-08	0.97794	1.46509e-07		6	1	9	6	1	9
10	3	domanska-2007c	im-1o6,1	imidazolium	bf4	BF4 derivatives	1-octanol	alcohols	284.106	130.231	320.18	FALSE			0.0162		0.0346774		TRUE	TRUE	TRUE	TRUE	TRUE		0.90767	0.0163966	0.955449	0.0350904	0.913297	0.0154174	0.958298	0.0330322	0.946368	7.9247e-08	0.97468	1.72882e-07	0.951398	7.3957e-08	0.977119	1.61341e-07		6	1	9	6	1	9
10	3	domanska-2007c	im-1o6,1	imidazolium	bf4	BF4 derivatives	1-octanol	alcohols	284.106	130.231	321.98	FALSE			0.0208		0.0442879		TRUE	TRUE	TRUE	TRUE	TRUE		0.904544	0.0171976	0.953859	0.0367703	0.910216	0.0161983	0.956741	0.0346737	0.944454	8.7385e-08	0.973749	1.90635e-07	0.949624	8.1501e-08	0.97626	1.77799e-07		6	1	9	6	1	9
10	3	domanska-2007c	im-1o6,1	imidazolium	bf4	BF4 derivatives	1-octanol	alcohols	284.106	130.231	324.41	FALSE			0.0282		0.0595361		TRUE	TRUE	TRUE	TRUE	TRUE		0.900206	0.0183307	0.951642	0.0391416	0.905935	0.0173048	0.954567	0.0369949	0.941796	9.9553e-08	0.972451	2.1718e-07	0.947155	9.2781e-08	0.975062	2.02407e-07		6	1	9	6	1	9
10	3	domanska-2007c	im-1o6,1	imidazolium	bf4	BF4 derivatives	1-octanol	alcohols	284.106	130.231	324.98	FALSE			0.0339		0.0711065		TRUE	TRUE	TRUE	TRUE	TRUE		0.899167	0.018605	0.951109	0.0397148	0.90491	0.0175733	0.954045	0.0375573	0.94116	1.0262e-07	0.97214	2.23871e-07	0.946563	9.5622e-08	0.974775	2.08605e-07		6	1	9	6	1	9
10	3	domanska-2007c	im-1o6,1	imidazolium	bf4	BF4 derivatives	1-octanol	alcohols	284.106	130.231	325.75	FALSE			0.0391		0.0815321		TRUE	TRUE	TRUE	TRUE	TRUE		0.897753	0.0189814	0.950384	0.0405007	0.903513	0.0179417	0.953333	0.0383282	0.940293	1.0689e-07	0.971716	2.33186e-07	0.945756	9.9584e-08	0.974382	2.17248e-07		6	1	9	6	1	9
10	3	domanska-2007c	im-1o6,1	imidazolium	bf4	BF4 derivatives	1-octanol	alcohols	284.106	130.231	326.61	FALSE			0.0477		0.0985082		TRUE	TRUE	TRUE	TRUE	TRUE		0.896158	0.0194093	0.949563	0.0413932	0.901936	0.0183607	0.952527	0.0392044	0.939315	1.1185e-07	0.971237	2.44007e-07	0.944844	1.0418e-07	0.973939	2.27274e-07		6	1	9	6	1	9
10	3	domanska-2007c	im-1o6,1	imidazolium	bf4	BF4 derivatives	1-octanol	alcohols	284.106	130.231	326.92	FALSE			0.0561		0.114777		TRUE	TRUE	TRUE	TRUE	TRUE		0.895579	0.0195656	0.949265	0.0417189	0.901363	0.0185137	0.952234	0.0395242	0.93896	1.1369e-07	0.971063	2.48021e-07	0.944512	1.0589e-07	0.973777	2.31005e-07		6	1	9	6	1	9
10	3	domanska-2007c	im-1o6,1	imidazolium	bf4	BF4 derivatives	1-octanol	alcohols	284.106	130.231	327.39	FALSE			0.0642		0.130181		TRUE	TRUE	TRUE	TRUE	TRUE		0.894696	0.0198044	0.94881	0.0422165	0.900489	0.0187477	0.951787	0.0400128	0.938418	1.1653e-07	0.970798	2.54216e-07	0.944007	1.0852e-07	0.973531	2.36742e-07		6	1	9	6	1	9
10	3	domanska-2007c	im-1o6,1	imidazolium	bf4	BF4 derivatives	1-octanol	alcohols	284.106	130.231	327.61	FALSE			0.074		0.148455		TRUE	TRUE	TRUE	TRUE	TRUE		0.894281	0.019917	0.948597	0.0424511	0.900079	0.0188581	0.951577	0.0402433	0.938164	1.1788e-07	0.970673	2.57162e-07	0.94377	1.0977e-07	0.973415	2.39469e-07		6	1	9	6	1	9
10	3	domanska-2007c	im-1o6,1	imidazolium	bf4	BF4 derivatives	1-octanol	alcohols	284.106	130.231	327.73	FALSE			0.0823		0.16363		TRUE	TRUE	TRUE	TRUE	TRUE		0.894055	0.0199787	0.948479	0.0425795	0.899854	0.0189185	0.951462	0.0403695	0.938025	1.1862e-07	0.970605	2.58776e-07	0.94364	1.1046e-07	0.973352	2.40974e-07		6	1	9	6	1	9
10	3	domanska-2007c	im-1o6,1	imidazolium	bf4	BF4 derivatives	1-octanol	alcohols	284.106	130.231	327.78	FALSE			0.094		0.184567		TRUE	TRUE	TRUE	TRUE	TRUE		0.89396	0.0200044	0.948431	0.042633	0.899761	0.0189438	0.951414	0.0404221	0.937967	1.1893e-07	0.970576	2.59452e-07	0.943586	1.1074e-07	0.973325	2.41585e-07		6	1	9	6	1	9
10	3	domanska-2007c	im-1o6,1	imidazolium	bf4	BF4 derivatives	1-octanol	alcohols	284.106	130.231	327.87	FALSE			0.1055		0.204644		TRUE	TRUE	TRUE	TRUE	TRUE		0.893789	0.0200508	0.948343	0.0427296	0.899592	0.0189893	0.951327	0.0405171	0.937862	1.1949e-07	0.970525	2.60674e-07	0.943488	1.1126e-07	0.973278	2.4272e-07		6	1	9	6	1	9
10	3	domanska-2007c	im-1o6,1	imidazolium	bf4	BF4 derivatives	1-octanol	alcohols	284.106	130.231	327.97	FALSE			0.1216		0.231951		TRUE	TRUE	TRUE	TRUE	TRUE		0.8936	0.0201025	0.948245	0.0428372	0.899404	0.0190399	0.951231	0.0406228	0.937746	1.2012e-07	0.970468	2.62048e-07	0.943379	1.1184e-07	0.973225	2.43985e-07		6	1	9	6	1	9
10	3	domanska-2007c	im-1o6,1	imidazolium	bf4	BF4 derivatives	1-octanol	alcohols	284.106	130.231	295.87	FALSE		0.5683		0.741725			TRUE	TRUE	TRUE	TRUE	TRUE		0.942987	0.00829693	0.973033	0.0179245	0.947821	0.00760576	0.975386	0.0164446	0.967839	1.9046e-08	0.984996	4.15499e-08	0.971037	1.8067e-08	0.986512	3.94141e-08		6	1	9	6	1	9
10	3	domanska-2007c	im-1o6,1	imidazolium	bf4	BF4 derivatives	1-octanol	alcohols	284.106	130.231	303.21	FALSE		0.5468		0.724678			TRUE	TRUE	TRUE	TRUE	TRUE		0.933621	0.0102679	0.968438	0.0221314	0.938727	0.00948953	0.970949	0.0204724	0.962182	2.9935e-08	0.982302	6.53048e-08	0.965915	2.8205e-08	0.984082	6.15307e-08		6	1	9	6	1	9
10	3	domanska-2007c	im-1o6,1	imidazolium	bf4	BF4 derivatives	1-octanol	alcohols	284.106	130.231	309.22	FALSE		0.485		0.672611			TRUE	TRUE	TRUE	TRUE	TRUE		0.925139	0.0121662	0.964234	0.0261651	0.930448	0.0113156	0.96687	0.0243598	0.957031	4.273e-08	0.979834	9.32178e-08	0.961216	4.0091e-08	0.981841	8.74607e-08		6	1	9	6	1	9
10	3	domanska-2007c	im-1o6,1	imidazolium	bf4	BF4 derivatives	1-octanol	alcohols	284.106	130.231	314.52	FALSE		0.4489		0.639898			TRUE	TRUE	TRUE	TRUE	TRUE		0.917022	0.0140793	0.960174	0.0302122	0.922494	0.0131655	0.962916	0.0282814	0.952084	5.7888e-08	0.977451	1.26286e-07	0.956676	5.4153e-08	0.979663	1.18138e-07		6	1	9	6	1	9
10	3	domanska-2007c	im-1o6,1	imidazolium	bf4	BF4 derivatives	1-octanol	alcohols	284.106	130.231	319.96	FALSE		0.396		0.588527			TRUE	TRUE	TRUE	TRUE	TRUE		0.908047	0.0163009	0.95564	0.0348894	0.913669	0.0153242	0.958486	0.032836	0.946598	7.83e-08	0.974792	1.70816e-07	0.951611	7.3079e-08	0.977222	1.59426e-07		6	1	9	6	1	9
10	3	domanska-2007c	im-1o6,1	imidazolium	bf4	BF4 derivatives	1-octanol	alcohols	284.106	130.231	321.85	FALSE		0.3773		0.569304			TRUE	TRUE	TRUE	TRUE	TRUE		0.904772	0.0171387	0.953975	0.0366468	0.910441	0.0161408	0.956855	0.034553	0.944594	8.6773e-08	0.973817	1.893e-07	0.949754	8.0933e-08	0.976323	1.7656e-07		6	1	9	6	1	9
10	3	domanska-2007c	im-1o6,1	imidazolium	bf4	BF4 derivatives	1-octanol	alcohols	284.106	130.231	323.06	FALSE		0.3538		0.544299			TRUE	TRUE	TRUE	TRUE	TRUE		0.902633	0.0176937	0.952883	0.0378093	0.908331	0.0166824	0.955785	0.03569	0.943283	9.2618e-08	0.973178	2.02051e-07	0.948537	8.6352e-08	0.975734	1.88382e-07		6	1	9	6	1	9
10	3	domanska-2007c	im-1o6,1	imidazolium	bf4	BF4 derivatives	1-octanol	alcohols	284.106	130.231	323.93	FALSE		0.3294		0.517278			TRUE	TRUE	TRUE	TRUE	TRUE		0.901074	0.018102	0.952086	0.0386636	0.906791	0.0170813	0.955003	0.0365265	0.942327	9.7036e-08	0.972711	2.11689e-07	0.947649	9.0448e-08	0.975303	1.97317e-07		6	1	9	6	1	9
10	3	domanska-2007c	im-1o6,1	imidazolium	bf4	BF4 derivatives	1-octanol	alcohols	284.106	130.231	324.35	FALSE		0.3146		0.500334			TRUE	TRUE	TRUE	TRUE	TRUE		0.900315	0.018302	0.951697	0.0390816	0.906042	0.0172767	0.954621	0.036936	0.941862	9.9235e-08	0.972484	2.16487e-07	0.947217	9.2486e-08	0.975093	2.01763e-07		6	1	9	6	1	9
10	3	domanska-2007c	im-1o6,1	imidazolium	bf4	BF4 derivatives	1-octanol	alcohols	284.106	130.231	325.25	FALSE		0.2905		0.4718			TRUE	TRUE	TRUE	TRUE	TRUE		0.898673	0.0187363	0.950856	0.039989	0.904421	0.0177018	0.953796	0.0378262	0.940857	1.041e-07	0.971992	2.271e-07	0.946281	9.6995e-08	0.974638	2.116e-07		6	1	9	6	1	9
10	3	domanska-2007c	im-1o6,1	imidazolium	bf4	BF4 derivatives	1-octanol	alcohols	284.106	130.231	325.95	FALSE		0.27		0.446559			TRUE	TRUE	TRUE	TRUE	TRUE		0.897384	0.0190802	0.950194	0.0407068	0.903148	0.0180384	0.953146	0.0385305	0.940067	1.0803e-07	0.971606	2.35673e-07	0.945545	1.0064e-07	0.97428	2.19552e-07		6	1	9	6	1	9
10	3	domanska-2007c	im-1o6,1	imidazolium	bf4	BF4 derivatives	1-octanol	alcohols	284.106	130.231	326.4	FALSE		0.2441		0.413311			TRUE	TRUE	TRUE	TRUE	TRUE		0.896549	0.0193041	0.949765	0.0411738	0.902322	0.0182576	0.952725	0.0389889	0.939555	1.1062e-07	0.971355	2.41324e-07	0.945068	1.0304e-07	0.974048	2.24787e-07		6	1	9	6	1	9
10	3	domanska-2007c	im-1o6,1	imidazolium	bf4	BF4 derivatives	1-octanol	alcohols	284.106	130.231	326.75	FALSE		0.2232		0.385308			TRUE	TRUE	TRUE	TRUE	TRUE		0.895897	0.0194798	0.949429	0.0415401	0.901677	0.0184297	0.952395	0.0393485	0.939155	1.1268e-07	0.971159	2.45818e-07	0.944694	1.0495e-07	0.973866	2.28954e-07		6	1	9	6	1	9
10	3	domanska-2007c	im-1o6,1	imidazolium	bf4	BF4 derivatives	1-octanol	alcohols	284.106	130.231	327.09	FALSE		0.2016		0.355194			TRUE	TRUE	TRUE	TRUE	TRUE		0.89526	0.0196517	0.949101	0.0418984	0.901047	0.0185981	0.952073	0.0397004	0.938764	1.1471e-07	0.970967	2.50246e-07	0.94433	1.0683e-07	0.973688	2.33055e-07		6	1	9	6	1	9
10	3	domanska-2007c	im-1o6,1	imidazolium	bf4	BF4 derivatives	1-octanol	alcohols	284.106	130.231	327.35	FALSE		0.1846		0.330605			TRUE	TRUE	TRUE	TRUE	TRUE		0.894772	0.019784	0.948849	0.042174	0.900564	0.0187277	0.951825	0.039971	0.938465	1.1628e-07	0.97082	2.53671e-07	0.94405	1.0829e-07	0.973552	2.3624e-07		6	1	9	6	1	9
10	3	domanska-2007c	im-1o6,1	imidazolium	bf4	BF4 derivatives	1-octanol	alcohols	284.106	130.231	327.59	FALSE		0.1676		0.305192			TRUE	TRUE	TRUE	TRUE	TRUE		0.894319	0.0199068	0.948616	0.0424297	0.900116	0.018848	0.951596	0.0402223	0.938187	1.1775e-07	0.970684	2.56878e-07	0.943791	1.0965e-07	0.973426	2.39207e-07		6	1	9	6	1	9
10	3	domanska-2007c	im-1o6,1	imidazolium	bf4	BF4 derivatives	1-octanol	alcohols	284.106	130.231	327.8	FALSE		0.1542		0.284552			TRUE	TRUE	TRUE	TRUE	TRUE		0.893922	0.0200147	0.948411	0.0426545	0.899723	0.0189539	0.951394	0.0404432	0.937944	1.1905e-07	0.970565	2.59714e-07	0.943564	1.1086e-07	0.973315	2.41847e-07		6	1	9	6	1	9
10	3	domanska-2007c	im-1o6,1	imidazolium	bf4	BF4 derivatives	1-octanol	alcohols	284.106	130.231	327.87	FALSE		0.143		0.266871			TRUE	TRUE	TRUE	TRUE	TRUE		0.893789	0.0200508	0.948343	0.0427296	0.899592	0.0189893	0.951327	0.0405171	0.937862	1.1949e-07	0.970525	2.60674e-07	0.943488	1.1126e-07	0.973278	2.4272e-07		6	1	9	6	1	9
10	3	domanska-2007c	im-1o6,1	imidazolium	bf4	BF4 derivatives	1-octanol	alcohols	284.106	130.231	327.97	FALSE		0.1298		0.245513			TRUE	TRUE	TRUE	TRUE	TRUE		0.8936	0.0201025	0.948245	0.0428372	0.899404	0.0190399	0.951231	0.0406228	0.937746	1.2012e-07	0.970468	2.62048e-07	0.943379	1.1184e-07	0.973225	2.43985e-07		6	1	9	6	1	9
11	1	domanska-2007c	im-1o6,1	imidazolium	ntf2	NTf2 derivatives	1-hexanol	alcohols	477.448	102.177	277.87	FALSE		0.393		0.751575			TRUE	TRUE	TRUE	TRUE	TRUE		0.605238	0.0502336	0.877513	0.198168	0.680394	0.0379493	0.908656	0.155636	0.797258	2.5883e-06	0.948387	1.20944e-05	0.805197	2.3216e-06	0.950774	1.08482e-05		6	3	10	6	3	10
11	1	domanska-2007c	im-1o6,1	imidazolium	ntf2	NTf2 derivatives	1-hexanol	alcohols	477.448	102.177	279.72	FALSE		0.3507		0.716219			TRUE	TRUE	TRUE	TRUE	TRUE		0.589732	0.0534055	0.870412	0.208629	0.666572	0.040281	0.903302	0.163966	0.790864	2.8252e-06	0.946439	1.32013e-05	0.799324	2.5283e-06	0.949011	1.1814e-05		6	3	10	6	3	10
11	1	domanska-2007c	im-1o6,1	imidazolium	ntf2	NTf2 derivatives	1-hexanol	alcohols	477.448	102.177	282.05	FALSE		0.2984		0.665259			TRUE	TRUE	TRUE	TRUE	TRUE		0.569436	0.057793	0.860722	0.222768	0.648493	0.0434747	0.896058	0.175176	0.782631	3.1524e-06	0.943896	1.47302e-05	0.791749	2.8133e-06	0.94671	1.31457e-05		6	3	10	6	3	10
11	1	domanska-2007c	im-1o6,1	imidazolium	ntf2	NTf2 derivatives	1-hexanol	alcohols	477.448	102.177	283.52	FALSE		0.2599		0.621345			TRUE	TRUE	TRUE	TRUE	TRUE		0.556162	0.060818	0.854128	0.232299	0.63669	0.0456538	0.891172	0.182695	0.777335	3.3767e-06	0.942239	1.57783e-05	0.786869	3.0083e-06	0.94521	1.40569e-05		6	3	10	6	3	10
11	1	domanska-2007c	im-1o6,1	imidazolium	ntf2	NTf2 derivatives	1-hexanol	alcohols	477.448	102.177	284.49	FALSE		0.2241		0.574398			TRUE	TRUE	TRUE	TRUE	TRUE		0.547192	0.0629362	0.84955	0.238871	0.628726	0.047168	0.887804	0.18786	0.773799	3.5328e-06	0.941124	1.65077e-05	0.783605	3.1438e-06	0.944199	1.469e-05		6	3	10	6	3	10
11	1	domanska-2007c	im-1o6,1	imidazolium	ntf2	NTf2 derivatives	1-hexanol	alcohols	477.448	102.177	284.98	FALSE		0.1979		0.535509			TRUE	TRUE	TRUE	TRUE	TRUE		0.542593	0.064046	0.847165	0.242281	0.62465	0.0479575	0.886057	0.190534	0.771999	3.6142e-06	0.940553	1.6888e-05	0.781943	3.2145e-06	0.943682	1.50204e-05		6	3	10	6	3	10
11	1	domanska-2007c	im-1o6,1	imidazolium	ntf2	NTf2 derivatives	1-hexanol	alcohols	477.448	102.177	285.47	FALSE		0.1643		0.478806			TRUE	TRUE	TRUE	TRUE	TRUE		0.53795	0.0651841	0.844728	0.245754	0.620536	0.0487641	0.884277	0.193252	0.77019	3.6973e-06	0.939977	1.72763e-05	0.780273	3.2866e-06	0.943161	1.53573e-05		6	3	10	6	3	10
11	1	domanska-2007c	im-1o6,1	imidazolium	ntf2	NTf2 derivatives	1-hexanol	alcohols	477.448	102.177	285.73	FALSE		0.1445		0.44111			TRUE	TRUE	TRUE	TRUE	TRUE		0.535467	0.0657998	0.843414	0.247624	0.618339	0.0491993	0.88332	0.194712	0.769227	3.7421e-06	0.93967	1.74857e-05	0.779384	3.3254e-06	0.942882	1.55386e-05		6	3	10	6	3	10
11	1	domanska-2007c	im-1o6,1	imidazolium	ntf2	NTf2 derivatives	1-hexanol	alcohols	477.448	102.177	285.83	FALSE		0.1221		0.393901			TRUE	TRUE	TRUE	TRUE	TRUE		0.534507	0.0660388	0.842904	0.248348	0.617491	0.049368	0.882949	0.195277	0.768856	3.7595e-06	0.939552	1.7567e-05	0.779041	3.3405e-06	0.942775	1.56091e-05		6	3	10	6	3	10
11	1	domanska-2007c	im-1o6,1	imidazolium	ntf2	NTf2 derivatives	1-hexanol	alcohols	477.448	102.177	285.94	FALSE		0.1109		0.368227			TRUE	TRUE	TRUE	TRUE	TRUE		0.53345	0.0663031	0.842341	0.249147	0.616556	0.0495544	0.88254	0.195901	0.768448	3.7787e-06	0.939421	1.76567e-05	0.778664	3.3572e-06	0.942657	1.56872e-05		6	3	10	6	3	10
11	1	domanska-2007c	im-1o6,1	imidazolium	ntf2	NTf2 derivatives	1-hexanol	alcohols	477.448	102.177	285.97	FALSE		0.0974		0.335212			TRUE	TRUE	TRUE	TRUE	TRUE		0.533161	0.0663754	0.842187	0.249366	0.616301	0.0496054	0.882428	0.196072	0.768336	3.7839e-06	0.939385	1.7681e-05	0.77856	3.3617e-06	0.942624	1.57082e-05		6	3	10	6	3	10
11	1	domanska-2007c	im-1o6,1	imidazolium	ntf2	NTf2 derivatives	1-hexanol	alcohols	477.448	102.177	278	FALSE			0.0198		0.0862485		TRUE	TRUE	TRUE	TRUE	TRUE		0.604165	0.0504482	0.87703	0.198882	0.679438	0.0381077	0.90829	0.156205	0.796812	2.6043e-06	0.948252	1.21691e-05	0.804788	2.3356e-06	0.950652	1.09136e-05		6	3	10	6	3	10
11	1	domanska-2007c	im-1o6,1	imidazolium	ntf2	NTf2 derivatives	1-hexanol	alcohols	477.448	102.177	280.5	FALSE			0.0265		0.112845		TRUE	TRUE	TRUE	TRUE	TRUE		0.583038	0.0548227	0.867267	0.213238	0.660604	0.0413167	0.900942	0.167626	0.78813	2.9311e-06	0.945599	1.36962e-05	0.79681	2.6206e-06	0.948251	1.22453e-05		6	3	10	6	3	10
11	1	domanska-2007c	im-1o6,1	imidazolium	ntf2	NTf2 derivatives	1-hexanol	alcohols	477.448	102.177	282.49	FALSE			0.037		0.152208		TRUE	TRUE	TRUE	TRUE	TRUE		0.565504	0.0586764	0.85879	0.225569	0.644993	0.044113	0.894622	0.177389	0.781054	3.2181e-06	0.943405	1.50372e-05	0.790297	2.8704e-06	0.946265	1.34125e-05		6	3	10	6	3	10
11	1	domanska-2007c	im-1o6,1	imidazolium	ntf2	NTf2 derivatives	1-hexanol	alcohols	477.448	102.177	284.04	FALSE			0.0485		0.192363		TRUE	TRUE	TRUE	TRUE	TRUE		0.551374	0.0619407	0.851697	0.235793	0.632437	0.0464576	0.889381	0.185443	0.775444	3.4596e-06	0.941644	1.61657e-05	0.785124	3.0803e-06	0.944671	1.43933e-05		6	3	10	6	3	10
11	1	domanska-2007c	im-1o6,1	imidazolium	ntf2	NTf2 derivatives	1-hexanol	alcohols	477.448	102.177	285.08	FALSE			0.0572		0.220879		TRUE	TRUE	TRUE	TRUE	TRUE		0.54165	0.064276	0.846672	0.242985	0.623813	0.0481207	0.885696	0.191085	0.771631	3.631e-06	0.940436	1.69665e-05	0.781603	3.2291e-06	0.943576	1.50886e-05		6	3	10	6	3	10
11	1	domanska-2007c	im-1o6,1	imidazolium	ntf2	NTf2 derivatives	1-hexanol	alcohols	477.448	102.177	285.72	FALSE			0.0709		0.262852		TRUE	TRUE	TRUE	TRUE	TRUE		0.535563	0.065776	0.843465	0.247552	0.618424	0.0491825	0.883357	0.194656	0.769264	3.7404e-06	0.939682	1.74777e-05	0.779418	3.3239e-06	0.942893	1.55316e-05		6	3	10	6	3	10
11	1	domanska-2007c	im-1o6,1	imidazolium	ntf2	NTf2 derivatives	1-hexanol	alcohols	477.448	102.177	285.94	FALSE			0.0813		0.292543		TRUE	TRUE	TRUE	TRUE	TRUE		0.53345	0.0663031	0.842341	0.249147	0.616556	0.0495544	0.88254	0.195901	0.768448	3.7787e-06	0.939421	1.76567e-05	0.778664	3.3572e-06	0.942657	1.56872e-05		6	3	10	6	3	10
11	1	domanska-2007c	im-1o6,1	imidazolium	ntf2	NTf2 derivatives	1-hexanol	alcohols	477.448	102.177	285.97	FALSE			0.0974		0.335212		TRUE	TRUE	TRUE	TRUE	TRUE		0.533161	0.0663754	0.842187	0.249366	0.616301	0.0496054	0.882428	0.196072	0.768336	3.7839e-06	0.939385	1.7681e-05	0.77856	3.3617e-06	0.942624	1.57082e-05		6	3	10	6	3	10
11	2	domanska-2007c	im-1o6,1	imidazolium	ntf2	NTf2 derivatives	1-octanol	alcohols	477.448	130.231	297.61	FALSE			0.0145		0.0511807		TRUE	TRUE	TRUE	TRUE	TRUE		0.724833	0.047416	0.906167	0.154325	0.756416	0.0425968	0.919255	0.14024	0.879278	1.1712e-06	0.963902	4.2938e-06	0.885544	1.2003e-06	0.965946	4.40048e-06		6	3	9	6	3	9
11	2	domanska-2007c	im-1o6,1	imidazolium	ntf2	NTf2 derivatives	1-octanol	alcohols	477.448	130.231	303.24	FALSE			0.0194		0.0676257		TRUE	TRUE	TRUE	TRUE	TRUE		0.687917	0.0562703	0.889883	0.179384	0.721615	0.0506542	0.904791	0.16361	0.865937	1.5443e-06	0.959482	5.66163e-06	0.873085	1.5691e-06	0.961862	5.75255e-06		6	3	9	6	3	9
11	2	domanska-2007c	im-1o6,1	imidazolium	ntf2	NTf2 derivatives	1-octanol	alcohols	477.448	130.231	308.15	FALSE			0.0311		0.105287		TRUE	TRUE	TRUE	TRUE	TRUE		0.652206	0.0656744	0.873016	0.204896	0.687932	0.059182	0.88989	0.187401	0.853589	1.9538e-06	0.955305	7.16291e-06	0.861493	1.9721e-06	0.957989	7.23e-06		6	3	9	6	3	9
11	2	domanska-2007c	im-1o6,1	imidazolium	ntf2	NTf2 derivatives	1-octanol	alcohols	477.448	130.231	310.8	FALSE			0.0415		0.136989		TRUE	TRUE	TRUE	TRUE	TRUE		0.631391	0.0715789	0.862633	0.220365	0.668327	0.0645167	0.880773	0.201814	0.846653	2.2134e-06	0.952922	8.11464e-06	0.854956	2.2269e-06	0.955772	8.16413e-06		6	3	9	6	3	9
11	2	domanska-2007c	im-1o6,1	imidazolium	ntf2	NTf2 derivatives	1-octanol	alcohols	477.448	130.231	312.05	FALSE			0.0522		0.167993		TRUE	TRUE	TRUE	TRUE	TRUE		0.621159	0.0746051	0.85737	0.228136	0.658705	0.0672439	0.876172	0.209048	0.843316	2.3463e-06	0.951766	8.60186e-06	0.851805	2.3572e-06	0.954695	8.64182e-06		6	3	9	6	3	9
11	2	domanska-2007c	im-1o6,1	imidazolium	ntf2	NTf2 derivatives	1-octanol	alcohols	477.448	130.231	313.05	FALSE			0.066		0.20576		TRUE	TRUE	TRUE	TRUE	TRUE		0.612771	0.07715	0.852974	0.23459	0.650826	0.0695336	0.872341	0.215053	0.840617	2.4578e-06	0.950826	9.01063e-06	0.849253	2.4663e-06	0.953819	9.0418e-06		6	3	9	6	3	9
11	2	domanska-2007c	im-1o6,1	imidazolium	ntf2	NTf2 derivatives	1-octanol	alcohols	477.448	130.231	313.58	FALSE			0.0858		0.255996		TRUE	TRUE	TRUE	TRUE	TRUE		0.608249	0.0785463	0.850573	0.238101	0.646583	0.0707883	0.870253	0.218318	0.839175	2.5188e-06	0.950322	9.23427e-06	0.84789	2.526e-06	0.953349	9.26066e-06		6	3	9	6	3	9
11	2	domanska-2007c	im-1o6,1	imidazolium	ntf2	NTf2 derivatives	1-octanol	alcohols	477.448	130.231	313.65	FALSE			0.0919		0.270614		TRUE	TRUE	TRUE	TRUE	TRUE		0.607647	0.0787333	0.850252	0.23857	0.646019	0.0709563	0.869974	0.218753	0.838984	2.5269e-06	0.950255	9.26396e-06	0.847709	2.534e-06	0.953287	9.28999e-06		6	3	9	6	3	9
11	2	domanska-2007c	im-1o6,1	imidazolium	ntf2	NTf2 derivatives	1-octanol	alcohols	477.448	130.231	301.12	FALSE		0.6181		0.855775			TRUE	TRUE	TRUE	TRUE	TRUE		0.702295	0.0527232	0.896358	0.16947	0.735176	0.047429	0.910535	0.154363	0.871064	1.3928e-06	0.961192	5.10621e-06	0.877881	1.4195e-06	0.963444	5.2041e-06		6	3	9	6	3	9
11	2	domanska-2007c	im-1o6,1	imidazolium	ntf2	NTf2 derivatives	1-octanol	alcohols	477.448	130.231	304.94	FALSE		0.5225		0.800466			TRUE	TRUE	TRUE	TRUE	TRUE		0.675947	0.0593253	0.884357	0.187793	0.710323	0.0534283	0.899899	0.171453	0.861737	1.6763e-06	0.958071	6.14556e-06	0.869148	1.6992e-06	0.960554	6.22951e-06		6	3	9	6	3	9
11	2	domanska-2007c	im-1o6,1	imidazolium	ntf2	NTf2 derivatives	1-octanol	alcohols	477.448	130.231	306.9	FALSE		0.455		0.75374			TRUE	TRUE	TRUE	TRUE	TRUE		0.661634	0.0631053	0.877582	0.198035	0.696822	0.0568559	0.893914	0.181005	0.856796	1.8412e-06	0.956398	6.75011e-06	0.864508	1.8614e-06	0.959003	6.82416e-06		6	3	9	6	3	9
11	2	domanska-2007c	im-1o6,1	imidazolium	ntf2	NTf2 derivatives	1-octanol	alcohols	477.448	130.231	308.48	FALSE		0.395		0.705329			TRUE	TRUE	TRUE	TRUE	TRUE		0.649675	0.0663746	0.871777	0.206752	0.685547	0.0598154	0.888798	0.189131	0.852736	1.9846e-06	0.955014	7.27583e-06	0.86069	2.0023e-06	0.957717	7.34072e-06		6	3	9	6	3	9
11	2	domanska-2007c	im-1o6,1	imidazolium	ntf2	NTf2 derivatives	1-octanol	alcohols	477.448	130.231	310.05	FALSE		0.3305		0.644104			TRUE	TRUE	TRUE	TRUE	TRUE		0.6374	0.0698405	0.865675	0.215853	0.673982	0.0629476	0.883438	0.197611	0.848635	2.1369e-06	0.953606	7.83418e-06	0.856826	2.1519e-06	0.956408	7.88917e-06		6	3	9	6	3	9
11	2	domanska-2007c	im-1o6,1	imidazolium	ntf2	NTf2 derivatives	1-octanol	alcohols	477.448	130.231	311.48	FALSE		0.2806		0.588473			TRUE	TRUE	TRUE	TRUE	TRUE		0.62586	0.0732047	0.859801	0.224553	0.663123	0.0659824	0.878296	0.205713	0.844843	2.2848e-06	0.952296	8.3764e-06	0.853247	2.2969e-06	0.955189	8.42076e-06		6	3	9	6	3	9
11	2	domanska-2007c	im-1o6,1	imidazolium	ntf2	NTf2 derivatives	1-octanol	alcohols	477.448	130.231	312.15	FALSE		0.2493		0.549041			TRUE	TRUE	TRUE	TRUE	TRUE		0.620328	0.0748544	0.856938	0.228772	0.657924	0.0674684	0.875795	0.20964	0.843048	2.3572e-06	0.951673	8.64182e-06	0.851551	2.3679e-06	0.954608	8.68105e-06		6	3	9	6	3	9
11	2	domanska-2007c	im-1o6,1	imidazolium	ntf2	NTf2 derivatives	1-octanol	alcohols	477.448	130.231	312.87	FALSE		0.2153		0.501469			TRUE	TRUE	TRUE	TRUE	TRUE		0.614294	0.0766833	0.853778	0.233412	0.652256	0.0691139	0.873041	0.213957	0.841105	2.4374e-06	0.950996	8.93585e-06	0.849715	2.4463e-06	0.953978	8.96847e-06		6	3	9	6	3	9
11	2	domanska-2007c	im-1o6,1	imidazolium	ntf2	NTf2 derivatives	1-octanol	alcohols	477.448	130.231	313.3	FALSE		0.1735		0.434902			TRUE	TRUE	TRUE	TRUE	TRUE		0.610644	0.0778044	0.851848	0.236238	0.64883	0.0701217	0.871361	0.216586	0.839938	2.4864e-06	0.950589	9.11549e-06	0.848611	2.4943e-06	0.953598	9.14445e-06		6	3	9	6	3	9
11	2	domanska-2007c	im-1o6,1	imidazolium	ntf2	NTf2 derivatives	1-octanol	alcohols	477.448	130.231	313.5	FALSE		0.1386		0.371025			TRUE	TRUE	TRUE	TRUE	TRUE		0.608935	0.0783334	0.850939	0.237567	0.647227	0.0705971	0.870571	0.217821	0.839393	2.5095e-06	0.950399	9.20017e-06	0.848096	2.5169e-06	0.95342	9.2273e-06		6	3	9	6	3	9
11	2	domanska-2007c	im-1o6,1	imidazolium	ntf2	NTf2 derivatives	1-octanol	alcohols	477.448	130.231	313.58	FALSE		0.1106		0.31314			TRUE	TRUE	TRUE	TRUE	TRUE		0.608249	0.0785463	0.850573	0.238101	0.646583	0.0707883	0.870253	0.218318	0.839175	2.5188e-06	0.950322	9.23427e-06	0.84789	2.526e-06	0.953349	9.26066e-06		6	3	9	6	3	9
11	2	domanska-2007c	im-1o6,1	imidazolium	ntf2	NTf2 derivatives	1-octanol	alcohols	477.448	130.231	313.65	FALSE		0.0919		0.270614			TRUE	TRUE	TRUE	TRUE	TRUE		0.607647	0.0787333	0.850252	0.23857	0.646019	0.0709563	0.869974	0.218753	0.838984	2.5269e-06	0.950255	9.26396e-06	0.847709	2.534e-06	0.953287	9.28999e-06		6	3	9	6	3	9
11	3	domanska-2007c	im-1o6,1	imidazolium	ntf2	NTf2 derivatives	n-hexane	alkanes	477.448	86.178	300.05	FALSE		0.5012		0.847721			TRUE	TRUE	TRUE	TRUE	TRUE		0.889102	0.00077469	0.977982	0.00427694	0.886578	0.00088703	0.97743	0.00489466	0.885009	8.0982e-16	0.977085	4.48661e-15	0.884605	8.6421e-16	0.976996	4.78794e-15		6	3	2	6	3	2
11	3	domanska-2007c	im-1o6,1	imidazolium	ntf2	NTf2 derivatives	n-hexane	alkanes	477.448	86.178	307.75	FALSE		0.4885		0.841046			TRUE	TRUE	TRUE	TRUE	TRUE		0.876328	0.00104463	0.97516	0.0057602	0.873337	0.0011945	0.97449	0.00658214	0.87384	1.9885e-15	0.974603	1.10168e-14	0.873323	2.1202e-15	0.974487	1.17464e-14		6	3	2	6	3	2
11	3	domanska-2007c	im-1o6,1	imidazolium	ntf2	NTf2 derivatives	n-hexane	alkanes	477.448	86.178	316.35	FALSE		0.4757		0.834072			TRUE	TRUE	TRUE	TRUE	TRUE		0.860869	0.00143055	0.971656	0.00787447	0.857291	0.00163346	0.97083	0.00898316	0.8608	5.1351e-15	0.97164	2.84498e-14	0.860146	5.4691e-15	0.971489	3.03002e-14		6	3	2	6	3	2
11	3	domanska-2007c	im-1o6,1	imidazolium	ntf2	NTf2 derivatives	n-hexane	alkanes	477.448	86.178	324.45	FALSE		0.4659		0.828556			TRUE	TRUE	TRUE	TRUE	TRUE		0.845124	0.00189122	0.967981	0.0103886	0.840927	0.00215684	0.966984	0.0118336	0.848004	1.1953e-14	0.968661	6.62227e-14	0.847211	1.2717e-14	0.968475	7.04554e-14		6	3	2	6	3	2
11	3	domanska-2007c	im-1o6,1	imidazolium	ntf2	NTf2 derivatives	n-hexane	alkanes	477.448	86.178	330.95	FALSE		0.4544		0.821879			TRUE	TRUE	TRUE	TRUE	TRUE		0.831637	0.00234077	0.964747	0.0128321	0.826898	0.00266719	0.963591	0.0146001	0.837397	2.2813e-14	0.966138	1.2639e-13	0.836486	2.4247e-14	0.965919	1.34335e-13		6	3	2	6	3	2
11	3	domanska-2007c	im-1o6,1	imidazolium	ntf2	NTf2 derivatives	n-hexane	alkanes	477.448	86.178	341.25	FALSE		0.443		0.815032			TRUE	TRUE	TRUE	TRUE	TRUE		0.808683	0.0032246	0.959047	0.0176073	0.802992	0.00366995	0.957594	0.0199992	0.820018	6.0225e-14	0.961893	3.33662e-13	0.818912	6.3913e-14	0.961618	3.54094e-13		6	3	2	6	3	2
11	4	domanska-2007c	im-1o6,1	imidazolium	ntf2	NTf2 derivatives	cyclohexane	cyclic alkanes	477.448	84.162	300.65	FALSE		0.3704		0.76945			TRUE	TRUE	TRUE	TRUE	TRUE		0.810544	0.00080498	0.960428	0.00454951	0.806879	0.00092121	0.959518	0.00520359	0.828472	1.9054e-15	0.964789	1.08093e-14	0.827845	2.0367e-15	0.964639	1.15541e-14		6	3	1	6	3	1
11	4	domanska-2007c	im-1o6,1	imidazolium	ntf2	NTf2 derivatives	cyclohexane	cyclic alkanes	477.448	84.162	306.35	FALSE		0.3582		0.759972			TRUE	TRUE	TRUE	TRUE	TRUE		0.797032	0.00100764	0.957039	0.00568952	0.792931	0.00115206	0.955993	0.0065006	0.817949	3.6627e-15	0.962248	2.07784e-14	0.817222	3.9122e-15	0.96207	2.21938e-14		6	3	1	6	3	1
11	4	domanska-2007c	im-1o6,1	imidazolium	ntf2	NTf2 derivatives	cyclohexane	cyclic alkanes	477.448	84.162	312.85	FALSE		0.344		0.748418			TRUE	TRUE	TRUE	TRUE	TRUE		0.780912	0.00128713	0.952876	0.00725819	0.776278	0.00147015	0.951654	0.0082832	0.805685	7.4814e-15	0.95922	4.24417e-14	0.80484	7.9843e-15	0.959008	4.52946e-14		6	3	1	6	3	1
11	4	domanska-2007c	im-1o6,1	imidazolium	ntf2	NTf2 derivatives	cyclohexane	cyclic alkanes	477.448	84.162	317.35	FALSE		0.3344		0.740268			TRUE	TRUE	TRUE	TRUE	TRUE		0.76931	0.00151494	0.949795	0.00853379	0.764286	0.00172925	0.948438	0.00973134	0.797044	1.2045e-14	0.957042	6.83309e-14	0.796115	1.2846e-14	0.956806	7.28749e-14		6	3	1	6	3	1
11	4	domanska-2007c	im-1o6,1	imidazolium	ntf2	NTf2 derivatives	cyclohexane	cyclic alkanes	477.448	84.162	324.25	FALSE		0.3212		0.728584			TRUE	TRUE	TRUE	TRUE	TRUE		0.750825	0.00192649	0.944733	0.0108314	0.745166	0.0021971	0.943144	0.0123374	0.783577	2.4323e-14	0.953574	1.37984e-13	0.782514	2.5915e-14	0.953296	1.47015e-13		6	3	1	6	3	1
11	4	domanska-2007c	im-1o6,1	imidazolium	ntf2	NTf2 derivatives	cyclohexane	cyclic alkanes	477.448	84.162	331.45	FALSE		0.3053		0.713721			TRUE	TRUE	TRUE	TRUE	TRUE		0.730649	0.00244772	0.938982	0.0137288	0.724282	0.0027894	0.937116	0.0156206	0.769274	4.8982e-14	0.949785	2.77873e-13	0.76807	5.2131e-14	0.949461	2.95737e-13		6	3	1	6	3	1
11	4	domanska-2007c	im-1o6,1	imidazolium	ntf2	NTf2 derivatives	cyclohexane	cyclic alkanes	477.448	84.162	339.45	FALSE		0.2852		0.693578			TRUE	TRUE	TRUE	TRUE	TRUE		0.707184	0.00315503	0.931977	0.0176383	0.699982	0.00359311	0.929754	0.020047	0.753123	1.0273e-13	0.945373	5.82784e-13	0.75176	1.0919e-13	0.944994	6.19431e-13		6	3	1	6	3	1
11	4	domanska-2007c	im-1o6,1	imidazolium	ntf2	NTf2 derivatives	cyclohexane	cyclic alkanes	477.448	84.162	345.65	FALSE		0.2717		0.679113			TRUE	TRUE	TRUE	TRUE	TRUE		0.68826	0.00381046	0.926062	0.0212384	0.68037	0.00433808	0.923522	0.0241208	0.740449	1.7783e-13	0.941806	1.00882e-12	0.738962	1.8883e-13	0.941381	1.07123e-12		6	3	1	6	3	1
11	4	domanska-2007c	im-1o6,1	imidazolium	ntf2	NTf2 derivatives	cyclohexane	cyclic alkanes	477.448	84.162	352.75	FALSE		0.2605		0.666487			TRUE	TRUE	TRUE	TRUE	TRUE		0.665814	0.00469369	0.918716	0.0260556	0.657101	0.00534264	0.915762	0.0295704	0.725798	3.2503e-13	0.937563	1.84388e-12	0.724169	3.4471e-13	0.937083	1.95553e-12		6	3	1	6	3	1
11	5	domanska-2007c	im-1o6,1	imidazolium	ntf2	NTf2 derivatives	water	water	477.448	18.015	307.2	FALSE			0.0001		0.00264354		TRUE	TRUE	TRUE	TRUE	TRUE		0.638775	0.00043142	0.979109	0.0113094	0.656324	0.00039325	0.980625	0.0103187	0.839623	0.00017422	0.992844	0.00459689	0.837419	0.00017545	0.992728	0.0046292		6	3	1	6	3	1
11	5	domanska-2007c	im-1o6,1	imidazolium	ntf2	NTf2 derivatives	water	water	477.448	18.015	336.55	FALSE			0.00015		0.00396027		TRUE	TRUE	TRUE	TRUE	TRUE		0.517454	0.00054655	0.96601	0.014286	0.534689	0.00050187	0.968208	0.0131329	0.761945	0.00021314	0.988349	0.00561827	0.760426	0.00021315	0.988252	0.00561853		6	3	1	6	3	1
11	5	domanska-2007c	im-1o6,1	imidazolium	ntf2	NTf2 derivatives	water	water	477.448	18.015	347.65	FALSE			0.00018		0.00474871		TRUE	TRUE	TRUE	TRUE	TRUE		0.47133	0.00062914	0.959396	0.0164107	0.487947	0.00057977	0.961912	0.0151416	0.728287	0.0002444	0.986118	0.00643716	0.727112	0.0002439	0.986037	0.00642408		6	3	1	6	3	1
11	5	domanska-2007c	im-1o6,1	imidazolium	ntf2	NTf2 derivatives	water	water	477.448	18.015	362.45	FALSE			0.00024		0.00632198		TRUE	TRUE	TRUE	TRUE	TRUE		0.411742	0.00078336	0.94885	0.0203546	0.427239	0.00072552	0.951852	0.018879	0.680814	0.00030541	0.982618	0.00803166	0.680149	0.00030403	0.982565	0.00799565		6	3	1	6	3	1
11	5	domanska-2007c	im-1o6,1	imidazolium	ntf2	NTf2 derivatives	water	water	477.448	18.015	312.35	FALSE		0.5817		0.973584			TRUE	TRUE	TRUE	TRUE	TRUE		0.618028	0.00044219	0.977211	0.0115886	0.635674	0.00040346	0.978832	0.0105839	0.827361	0.00017704	0.992188	0.00467097	0.825251	0.00017805	0.992074	0.00469749		6	3	1	6	3	1
11	5	domanska-2007c	im-1o6,1	imidazolium	ntf2	NTf2 derivatives	water	water	477.448	18.015	324.65	FALSE		0.5224		0.966654			TRUE	TRUE	TRUE	TRUE	TRUE		0.567268	0.00048356	0.972022	0.0126596	0.584882	0.0004425	0.973918	0.0115966	0.795631	0.00019047	0.990401	0.00502359	0.793791	0.00019098	0.990293	0.00503697		6	3	1	6	3	1
11	5	domanska-2007c	im-1o6,1	imidazolium	ntf2	NTf2 derivatives	water	water	477.448	18.015	328.35	FALSE		0.4961		0.963089			TRUE	TRUE	TRUE	TRUE	TRUE		0.5518	0.00050057	0.970264	0.0130993	0.569331	0.00045854	0.97225	0.0120121	0.785451	0.00019643	0.989799	0.00518	0.783705	0.00019679	0.989694	0.00518944		6	3	1	6	3	1
11	5	domanska-2007c	im-1o6,1	imidazolium	ntf2	NTf2 derivatives	water	water	477.448	18.015	334.75	FALSE		0.465		0.958394			TRUE	TRUE	TRUE	TRUE	TRUE		0.52499	0.00053544	0.966987	0.0139995	0.542301	0.00049139	0.969137	0.012862	0.767212	0.00020904	0.988681	0.00551077	0.765641	0.00020913	0.988582	0.00551313		6	3	1	6	3	1
11	5	domanska-2007c	im-1o6,1	imidazolium	ntf2	NTf2 derivatives	water	water	477.448	18.015	342.25	FALSE		0.4186		0.950203			TRUE	TRUE	TRUE	TRUE	TRUE		0.493671	0.00058582	0.962742	0.0152973	0.510618	0.0005389	0.965099	0.0140887	0.744904	0.00022784	0.987243	0.00600351	0.743557	0.0002276	0.987154	0.00599723		6	3	1	6	3	1
11	5	domanska-2007c	im-1o6,1	imidazolium	ntf2	NTf2 derivatives	water	water	477.448	18.015	348.05	FALSE		0.3942		0.945192			TRUE	TRUE	TRUE	TRUE	TRUE		0.469685	0.0006326	0.959138	0.0164995	0.486275	0.00058304	0.961666	0.0152258	0.727039	0.00024574	0.986032	0.00647224	0.725878	0.00024522	0.985951	0.00645863		6	3	1	6	3	1
11	5	domanska-2007c	im-1o6,1	imidazolium	ntf2	NTf2 derivatives	water	water	477.448	18.015	357.25	FALSE		0.3589		0.936856			TRUE	TRUE	TRUE	TRUE	TRUE		0.432341	0.0007227	0.952797	0.0188069	0.448262	0.00066815	0.955619	0.0174112	0.697774	0.00028108	0.98392	0.00739639	0.696925	0.00028004	0.983856	0.00736922		6	3	1	6	3	1
11	5	domanska-2007c	im-1o6,1	imidazolium	ntf2	NTf2 derivatives	water	water	477.448	18.015	369.95	FALSE		0.3289		0.928514			TRUE	TRUE	TRUE	TRUE	TRUE		0.382834	0.00088499	0.94266	0.022937	0.397668	0.00082175	0.945939	0.0213316	0.655937	0.00034698	0.980592	0.00911528	0.655545	0.00034505	0.980559	0.00906502		6	3	1	6	3	1
11	6	marciniak-2011b	im-1o6,1	imidazolium	ntf2	NTf2 derivatives	thiophene	S-compounds	477.448	84.14	282.9	FALSE			0.0019		0.0106865		TRUE	TRUE	TRUE	TRUE	TRUE										0.136151	1.9324e-05	0.472114	0.000109643	0.135189	2.1479e-05	0.470069	0.000121869		6	3	1	6	3	1
11	6	marciniak-2011b	im-1o6,1	imidazolium	ntf2	NTf2 derivatives	thiophene	S-compounds	477.448	84.14	286.6	FALSE			0.0022		0.0123567		TRUE	TRUE	TRUE	TRUE	TRUE										0.126787	3.0392e-05	0.451727	0.000172433	0.125824	3.4596e-05	0.449566	0.000196281		6	3	1	6	3	1
11	6	marciniak-2011b	im-1o6,1	imidazolium	ntf2	NTf2 derivatives	thiophene	S-compounds	477.448	84.14	289.3	FALSE			0.0024		0.0134676		TRUE	TRUE	TRUE	TRUE	TRUE										0.119938	4.3618e-05	0.43609	0.000247458	0.118976	5.0798e-05	0.433843	0.000288182		6	3	1	6	3	1
11	6	marciniak-2011b	im-1o6,1	imidazolium	ntf2	NTf2 derivatives	thiophene	S-compounds	477.448	84.14	292.1	FALSE			0.0026		0.0145764		TRUE	TRUE	TRUE	TRUE	TRUE										0.112783	6.575e-05	0.419055	0.00037298	0.111827	7.9091e-05	0.416723	0.000448632		6	3	1	6	3	1
11	6	marciniak-2011b	im-1o6,1	imidazolium	ntf2	NTf2 derivatives	thiophene	S-compounds	477.448	84.14	293.9	FALSE			0.0029		0.0162358		TRUE	TRUE	TRUE	TRUE	TRUE										0.108135	8.7929e-05	0.407585	0.000498743	0.107187	0.00010909	0.405204	0.00061871		6	3	1	6	3	1
11	6	marciniak-2011b	im-1o6,1	imidazolium	ntf2	NTf2 derivatives	thiophene	S-compounds	477.448	84.14	295.8	FALSE			0.0031		0.0173395		TRUE	TRUE	TRUE	TRUE	TRUE										0.102916	0.00325373	0.394303	0.0181865	0.102113	0.00375568	0.39222	0.0209437		6	3	1	6	3	1
11	6	marciniak-2011b	im-1o6,1	imidazolium	ntf2	NTf2 derivatives	thiophene	S-compounds	477.448	84.14	297.9	FALSE			0.0033		0.0184412		TRUE	TRUE	TRUE	TRUE	TRUE										0.0979602	0.00458259	0.381279	0.0254583	0.0971886	0.00488862	0.379214	0.0271205		6	3	1	6	3	1
11	6	marciniak-2011b	im-1o6,1	imidazolium	ntf2	NTf2 derivatives	thiophene	S-compounds	477.448	84.14	300	FALSE			0.0036		0.0200899		TRUE	TRUE	TRUE	TRUE	TRUE										0.0930892	0.00560815	0.368068	0.0310102	0.0923464	0.00587676	0.366017	0.0324558		6	3	1	6	3	1
11	6	marciniak-2011b	im-1o6,1	imidazolium	ntf2	NTf2 derivatives	thiophene	S-compounds	477.448	84.14	302.4	FALSE			0.004		0.0222812		TRUE	TRUE	TRUE	TRUE	TRUE										0.087587	0.00672247	0.352633	0.0369841	0.0868774	0.00698337	0.350601	0.0383741		6	3	1	6	3	1
11	6	marciniak-2011b	im-1o6,1	imidazolium	ntf2	NTf2 derivatives	thiophene	S-compounds	477.448	84.14	305.1	FALSE			0.0044		0.0244644		TRUE	TRUE	TRUE	TRUE	TRUE										0.0814436	0.00800523	0.334719	0.0437868	0.0807767	0.00827883	0.332729	0.0452275		6	3	1	6	3	1
11	6	marciniak-2011b	im-1o6,1	imidazolium	ntf2	NTf2 derivatives	thiophene	S-compounds	477.448	84.14	307.5	FALSE			0.0049		0.0271822		TRUE	TRUE	TRUE	TRUE	TRUE										0.0759882	0.00922636	0.318175	0.0501899	0.0753675	0.00952709	0.316253	0.0517561		6	3	1	6	3	1
11	6	marciniak-2011b	im-1o6,1	imidazolium	ntf2	NTf2 derivatives	thiophene	S-compounds	477.448	84.14	309.9	FALSE			0.0055		0.0304272		TRUE	TRUE	TRUE	TRUE	TRUE										0.0705022	0.010573	0.300897	0.0571704	0.069937	0.0109191	0.29908	0.0589509		6	3	1	6	3	1
11	6	marciniak-2011b	im-1o6,1	imidazolium	ntf2	NTf2 derivatives	thiophene	S-compounds	477.448	84.14	312.3	FALSE			0.0062		0.0341907		TRUE	TRUE	TRUE	TRUE	TRUE										0.0649353	0.0121062	0.282671	0.0650166	0.0644405	0.0125263	0.281016	0.0671479		6	3	1	6	3	1
11	6	marciniak-2011b	im-1o6,1	imidazolium	ntf2	NTf2 derivatives	thiophene	S-compounds	477.448	84.14	314	FALSE			0.0068		0.0373975		TRUE	TRUE	FALSE	FALSE	FALSE																			6	3	1	6	3	1
11	6	marciniak-2011b	im-1o6,1	imidazolium	ntf2	NTf2 derivatives	thiophene	S-compounds	477.448	84.14	315.6	FALSE			0.0076		0.0416463		TRUE	TRUE	FALSE	FALSE	FALSE																			6	3	1	6	3	1
11	6	marciniak-2011b	im-1o6,1	imidazolium	ntf2	NTf2 derivatives	thiophene	S-compounds	477.448	84.14	317	FALSE			0.0083		0.0453389		TRUE	TRUE	FALSE	FALSE	FALSE																			6	3	1	6	3	1
11	6	marciniak-2011b	im-1o6,1	imidazolium	ntf2	NTf2 derivatives	thiophene	S-compounds	477.448	84.14	318	FALSE			0.009		0.0490082		TRUE	TRUE	TRUE	TRUE	TRUE																			6	3	1	6	3	1
11	6	marciniak-2011b	im-1o6,1	imidazolium	ntf2	NTf2 derivatives	thiophene	S-compounds	477.448	84.14	318.8	FALSE			0.0095		0.0516152		TRUE	TRUE	TRUE	TRUE	TRUE																			6	3	1	6	3	1
11	6	marciniak-2011b	im-1o6,1	imidazolium	ntf2	NTf2 derivatives	thiophene	S-compounds	477.448	84.14	319.8	FALSE			0.0108		0.0583389		TRUE	TRUE	FALSE	TRUE	FALSE																			6	3	1	6	3	1
11	6	marciniak-2011b	im-1o6,1	imidazolium	ntf2	NTf2 derivatives	thiophene	S-compounds	477.448	84.14	321	FALSE			0.0124		0.0665081		TRUE	TRUE	TRUE	TRUE	TRUE																			6	3	1	6	3	1
11	6	marciniak-2011b	im-1o6,1	imidazolium	ntf2	NTf2 derivatives	thiophene	S-compounds	477.448	84.14	322.1	FALSE			0.014		0.0745627		TRUE	TRUE	FALSE	TRUE	FALSE																			6	3	1	6	3	1
11	6	marciniak-2011b	im-1o6,1	imidazolium	ntf2	NTf2 derivatives	thiophene	S-compounds	477.448	84.14	323.2	FALSE			0.0157		0.0829977		TRUE	TRUE	TRUE	TRUE	TRUE																			6	3	1	6	3	1
11	6	marciniak-2011b	im-1o6,1	imidazolium	ntf2	NTf2 derivatives	thiophene	S-compounds	477.448	84.14	324.3	FALSE			0.0182		0.0951777		TRUE	TRUE	TRUE	TRUE	TRUE																			6	3	1	6	3	1
11	6	marciniak-2011b	im-1o6,1	imidazolium	ntf2	NTf2 derivatives	thiophene	S-compounds	477.448	84.14	324.3	FALSE			0.0242		0.123366		TRUE	TRUE	TRUE	TRUE	TRUE																			6	3	1	6	3	1
11	6	marciniak-2011b	im-1o6,1	imidazolium	ntf2	NTf2 derivatives	thiophene	S-compounds	477.448	84.14	323.3	FALSE		0.0281		0.140939			TRUE	TRUE	TRUE	TRUE	TRUE																			6	3	1	6	3	1
11	6	marciniak-2011b	im-1o6,1	imidazolium	ntf2	NTf2 derivatives	thiophene	S-compounds	477.448	84.14	322.2	FALSE		0.0317		0.156665			TRUE	TRUE	FALSE	TRUE	FALSE																			6	3	1	6	3	1
11	6	marciniak-2011b	im-1o6,1	imidazolium	ntf2	NTf2 derivatives	thiophene	S-compounds	477.448	84.14	320.4	FALSE		0.0359		0.17444			TRUE	TRUE	TRUE	TRUE	TRUE																			6	3	1	6	3	1
11	6	marciniak-2011b	im-1o6,1	imidazolium	ntf2	NTf2 derivatives	thiophene	S-compounds	477.448	84.14	319.2	FALSE		0.039		0.18718			TRUE	TRUE	TRUE	TRUE	TRUE																			6	3	1	6	3	1
11	6	marciniak-2011b	im-1o6,1	imidazolium	ntf2	NTf2 derivatives	thiophene	S-compounds	477.448	84.14	317.9	FALSE		0.0414		0.196831			TRUE	TRUE	TRUE	TRUE	TRUE																			6	3	1	6	3	1
11	6	marciniak-2011b	im-1o6,1	imidazolium	ntf2	NTf2 derivatives	thiophene	S-compounds	477.448	84.14	316.9	FALSE		0.0433		0.204344			TRUE	TRUE	FALSE	FALSE	FALSE																			6	3	1	6	3	1
11	6	marciniak-2011b	im-1o6,1	imidazolium	ntf2	NTf2 derivatives	thiophene	S-compounds	477.448	84.14	315.4	FALSE		0.046		0.214831			TRUE	TRUE	FALSE	FALSE	FALSE																			6	3	1	6	3	1
11	6	marciniak-2011b	im-1o6,1	imidazolium	ntf2	NTf2 derivatives	thiophene	S-compounds	477.448	84.14	314.1	FALSE		0.0479		0.222081			TRUE	TRUE	FALSE	FALSE	FALSE																			6	3	1	6	3	1
11	6	marciniak-2011b	im-1o6,1	imidazolium	ntf2	NTf2 derivatives	thiophene	S-compounds	477.448	84.14	312.5	FALSE		0.05		0.229973			TRUE	TRUE	TRUE	TRUE	TRUE										0.064465	0.0122449	0.281098	0.0657212	0.0639769	0.012673	0.279459	0.0678907		6	3	1	6	3	1
11	6	marciniak-2011b	im-1o6,1	imidazolium	ntf2	NTf2 derivatives	thiophene	S-compounds	477.448	84.14	310.7	FALSE		0.0524		0.238839			TRUE	TRUE	TRUE	TRUE	TRUE										0.0686589	0.0110596	0.294942	0.0596723	0.0681156	0.0114264	0.293172	0.0615512		6	3	1	6	3	1
11	6	marciniak-2011b	im-1o6,1	imidazolium	ntf2	NTf2 derivatives	thiophene	S-compounds	477.448	84.14	308.9	FALSE		0.0549		0.247907			TRUE	TRUE	TRUE	TRUE	TRUE										0.0727947	0.00999324	0.308198	0.0541754	0.0722043	0.0103177	0.306329	0.0558535		6	3	1	6	3	1
11	6	marciniak-2011b	im-1o6,1	imidazolium	ntf2	NTf2 derivatives	thiophene	S-compounds	477.448	84.14	306.4	FALSE		0.0573		0.256455			TRUE	TRUE	TRUE	TRUE	TRUE										0.0784897	0.00865407	0.325837	0.0471978	0.077846	0.00894036	0.323878	0.0486965		6	3	1	6	3	1
11	6	marciniak-2011b	im-1o6,1	imidazolium	ntf2	NTf2 derivatives	thiophene	S-compounds	477.448	84.14	304	FALSE		0.0599		0.265547			TRUE	TRUE	TRUE	TRUE	TRUE										0.0839427	0.00747428	0.342095	0.0409806	0.0832585	0.00774052	0.340088	0.0423894		6	3	1	6	3	1
11	6	marciniak-2011b	im-1o6,1	imidazolium	ntf2	NTf2 derivatives	thiophene	S-compounds	477.448	84.14	301.4	FALSE		0.063		0.276163			TRUE	TRUE	TRUE	TRUE	TRUE										0.0898738	0.00625907	0.359116	0.0345072	0.0891504	0.0065205	0.357076	0.0359058		6	3	1	6	3	1
11	6	marciniak-2011b	im-1o6,1	imidazolium	ntf2	NTf2 derivatives	thiophene	S-compounds	477.448	84.14	297.2	FALSE		0.0664		0.287537			TRUE	TRUE	TRUE	TRUE	TRUE										0.0996	0.00420433	0.385634	0.0233974	0.0988181	0.00453912	0.383563	0.0252218		6	3	1	6	3	1
11	6	marciniak-2011b	im-1o6,1	imidazolium	ntf2	NTf2 derivatives	thiophene	S-compounds	477.448	84.14	293.8	FALSE		0.0693		0.297022			TRUE	TRUE	TRUE	TRUE	TRUE										0.108395	8.6458e-05	0.408235	0.000490403	0.107445	0.00010704	0.405854	0.000607089		6	3	1	6	3	1
11	6	marciniak-2011b	im-1o6,1	imidazolium	ntf2	NTf2 derivatives	thiophene	S-compounds	477.448	84.14	291.2	FALSE		0.0719		0.305363			TRUE	TRUE	TRUE	TRUE	TRUE										0.11509	5.7353e-05	0.42463	0.000325359	0.114133	6.8179e-05	0.422327	0.000386755		6	3	1	6	3	1
11	6	marciniak-2011b	im-1o6,1	imidazolium	ntf2	NTf2 derivatives	thiophene	S-compounds	477.448	84.14	289	FALSE		0.0737		0.311048			TRUE	TRUE	TRUE	TRUE	TRUE										0.1207	4.1839e-05	0.437861	0.000237367	0.119738	4.8588e-05	0.435625	0.000275647		6	3	1	6	3	1
11	6	marciniak-2011b	im-1o6,1	imidazolium	ntf2	NTf2 derivatives	thiophene	S-compounds	477.448	84.14	287.3	FALSE		0.0754		0.316353			TRUE	TRUE	TRUE	TRUE	TRUE										0.125015	3.3284e-05	0.44774	0.000188839	0.124051	3.8093e-05	0.445555	0.000216118		6	3	1	6	3	1
11	6	marciniak-2011b	im-1o6,1	imidazolium	ntf2	NTf2 derivatives	thiophene	S-compounds	477.448	84.14	285.8	FALSE		0.0765		0.319753			TRUE	TRUE	TRUE	TRUE	TRUE										0.128813	2.7452e-05	0.456232	0.000155755	0.127849	3.107e-05	0.454095	0.000176279		6	3	1	6	3	1
11	6	marciniak-2011b	im-1o6,1	imidazolium	ntf2	NTf2 derivatives	thiophene	S-compounds	477.448	84.14	284.6	FALSE		0.0771		0.321597			TRUE	TRUE	TRUE	TRUE	TRUE										0.131849	2.3664e-05	0.462884	0.000134265	0.130886	2.6569e-05	0.460787	0.000150746		6	3	1	6	3	1
11	6	marciniak-2011b	im-1o6,1	imidazolium	ntf2	NTf2 derivatives	thiophene	S-compounds	477.448	84.14	284	FALSE		0.0773		0.322209			TRUE	TRUE	TRUE	TRUE	TRUE										0.133367	2.2009e-05	0.466168	0.000124876	0.132404	2.4619e-05	0.464089	0.000139683		6	3	1	6	3	1
11	6	marciniak-2011b	im-1o6,1	imidazolium	ntf2	NTf2 derivatives	thiophene	S-compounds	477.448	84.14	283.6	FALSE		0.0774		0.322515			TRUE	TRUE	TRUE	TRUE	TRUE										0.134379	2.0983e-05	0.468341	0.000119055	0.133417	2.3416e-05	0.466274	0.000132858		6	3	1	6	3	1
12	1	domanska-2007c	im-1o6,1o6	imidazolium	ntf2	NTf2 derivatives	water	water	577.603	18.015	306.16	FALSE		0.5333		0.973431			TRUE	TRUE	TRUE	TRUE	TRUE		0.711321	2.5602e-05	0.987501	0.000820208	0.72426	2.2715e-05	0.988265	0.000727782	0.868453	9.6565e-06	0.995298	0.000309517	0.866887	9.4705e-06	0.995234	0.000303557		10	3	1	8	3	1
12	1	domanska-2007c	im-1o6,1o6	imidazolium	ntf2	NTf2 derivatives	water	water	577.603	18.015	316.74	FALSE		0.4933		0.968958			TRUE	TRUE	TRUE	TRUE	TRUE		0.674104	2.7589e-05	0.985146	0.00088381	0.687658	2.4447e-05	0.986031	0.000783233	0.846882	1.0141e-05	0.994393	0.000325042	0.845382	9.919e-06	0.994328	0.000317928		10	3	1	8	3	1
12	1	domanska-2007c	im-1o6,1o6	imidazolium	ntf2	NTf2 derivatives	water	water	577.603	18.015	331.05	FALSE		0.4374		0.961431			TRUE	TRUE	TRUE	TRUE	TRUE		0.621122	3.2377e-05	0.98133	0.00103704	0.635188	2.8676e-05	0.982402	0.000918601	0.814106	1.1653e-05	0.992929	0.000373487	0.812735	1.1362e-05	0.992865	0.000364164		10	3	1	8	3	1
12	1	domanska-2007c	im-1o6,1o6	imidazolium	ntf2	NTf2 derivatives	water	water	577.603	18.015	341.25	FALSE		0.396		0.954589			TRUE	TRUE	TRUE	TRUE	TRUE		0.582274	3.7588e-05	0.978114	0.00120375	0.596471	3.3306e-05	0.979336	0.00106676	0.788478	1.3453e-05	0.991702	0.000431154	0.787228	1.3092e-05	0.991641	0.000419589		10	3	1	8	3	1
12	1	domanska-2007c	im-1o6,1o6	imidazolium	ntf2	NTf2 derivatives	water	water	577.603	18.015	350.32	FALSE		0.357		0.946812			TRUE	TRUE	TRUE	TRUE	TRUE		0.54752	4.3808e-05	0.974872	0.00140268	0.561676	3.8851e-05	0.976239	0.00124415	0.764329	1.5702e-05	0.990475	0.000503197	0.763206	1.5261e-05	0.990416	0.000489071		10	3	1	8	3	1
12	1	domanska-2007c	im-1o6,1o6	imidazolium	ntf2	NTf2 derivatives	water	water	577.603	18.015	363.9	FALSE		0.319		0.937574			TRUE	TRUE	TRUE	TRUE	TRUE		0.496031	5.6717e-05	0.969285	0.00181528	0.509885	5.0396e-05	0.970893	0.00161329	0.726214	2.0603e-05	0.988378	0.000660158	0.725312	1.9992e-05	0.988326	0.000640592		10	3	1	8	3	1
13	1	domanska-2005	im-1o6	imidazolium	bf4	BF4 derivatives	n-pentane	alkanes	270.075	72.151	309.05	FALSE		0.7427		0.915289			TRUE	TRUE	TRUE	TRUE	TRUE		0.983778	5.1737e-06	0.995614	1.93659e-05	0.983735	5.1683e-06	0.995602	1.93457e-05	0.954204	1.0307e-19	0.987341	3.85811e-19	0.953864	1.1623e-19	0.987243	4.35071e-19		5	1	1	5	1	1
13	1	domanska-2005	im-1o6	imidazolium	bf4	BF4 derivatives	n-pentane	alkanes	270.075	72.151	306.34	FALSE		0.7627		0.923259			TRUE	TRUE	TRUE	TRUE	TRUE		0.984382	4.3634e-06	0.995779	1.63328e-05	0.98434	4.3589e-06	0.995768	1.6316e-05	0.955825	6.8028e-20	0.987804	2.54642e-19	0.955498	7.6693e-20	0.987711	2.87077e-19		5	1	1	5	1	1
13	1	domanska-2005	im-1o6	imidazolium	bf4	BF4 derivatives	n-pentane	alkanes	270.075	72.151	303.95	FALSE		0.7798		0.929853			TRUE	TRUE	TRUE	TRUE	TRUE		0.984899	3.7436e-06	0.995921	1.40129e-05	0.984858	3.7397e-06	0.995909	1.39983e-05	0.957225	4.6856e-20	0.988203	1.75391e-19	0.956909	5.281e-20	0.988113	1.97678e-19		5	1	1	5	1	1
13	1	domanska-2005	im-1o6	imidazolium	bf4	BF4 derivatives	n-pentane	alkanes	270.075	72.151	301.24	FALSE		0.8009		0.937723			TRUE	TRUE	TRUE	TRUE	TRUE		0.985467	3.1356e-06	0.996076	1.1737e-05	0.985427	3.1323e-06	0.996065	1.17247e-05	0.958777	3.0474e-20	0.988644	1.1407e-19	0.958473	3.4335e-20	0.988558	1.28522e-19		5	1	1	5	1	1
13	1	domanska-2005	im-1o6	imidazolium	bf4	BF4 derivatives	n-pentane	alkanes	270.075	72.151	299.05	FALSE		0.8153		0.942933			TRUE	TRUE	TRUE	TRUE	TRUE		0.985913	2.7097e-06	0.996197	1.01429e-05	0.985874	2.7068e-06	0.996187	1.0132e-05	0.960004	2.1398e-20	0.988992	8.00968e-20	0.95971	2.4102e-20	0.988909	9.02184e-20		5	1	1	5	1	1
13	2	domanska-2005	im-1o6	imidazolium	bf4	BF4 derivatives	n-hexane	alkanes	270.075	86.178	341.32	FALSE		0.7862		0.920155			TRUE	TRUE	TRUE	TRUE	TRUE		0.987036	3.1963e-05	0.995827	0.000100163	0.986999	3.1928e-05	0.995815	0.000100053	0.961034	1.5461e-17	0.987228	4.84535e-17	0.960677	1.7451e-17	0.987107	5.469e-17		5	1	2	5	1	2
13	2	domanska-2005	im-1o6	imidazolium	bf4	BF4 derivatives	n-hexane	alkanes	270.075	86.178	339.05	FALSE		0.7955		0.92419			TRUE	TRUE	TRUE	TRUE	TRUE		0.987464	2.8589e-05	0.995965	8.95902e-05	0.987428	2.8558e-05	0.995954	8.9493e-05	0.962169	1.1703e-17	0.98761	3.66763e-17	0.961823	1.3207e-17	0.987493	4.13897e-17		5	1	2	5	1	2
13	2	domanska-2005	im-1o6	imidazolium	bf4	BF4 derivatives	n-hexane	alkanes	270.075	86.178	334.68	FALSE		0.805		0.928251			TRUE	TRUE	TRUE	TRUE	TRUE		0.988254	2.2942e-05	0.996222	7.18949e-05	0.98822	2.2917e-05	0.996211	7.18165e-05	0.964292	6.7709e-18	0.988322	2.12195e-17	0.963967	7.6387e-18	0.988213	2.39391e-17		5	1	2	5	1	2
13	2	domanska-2005	im-1o6	imidazolium	bf4	BF4 derivatives	n-hexane	alkanes	270.075	86.178	333.46	FALSE		0.808		0.929521			TRUE	TRUE	TRUE	TRUE	TRUE		0.988467	2.1548e-05	0.996291	6.75266e-05	0.988433	2.1524e-05	0.99628	6.74514e-05	0.96487	5.796e-18	0.988516	1.81642e-17	0.964551	6.5383e-18	0.988409	2.04905e-17		5	1	2	5	1	2
13	2	domanska-2005	im-1o6	imidazolium	bf4	BF4 derivatives	n-hexane	alkanes	270.075	86.178	322.98	FALSE		0.8233		0.935905			TRUE	TRUE	TRUE	TRUE	TRUE		0.990166	1.2274e-05	0.996841	3.84647e-05	0.990136	1.2261e-05	0.996831	3.8424e-05	0.969583	1.4493e-18	0.990089	4.54199e-18	0.96931	1.6334e-18	0.989998	5.11895e-18		5	1	2	5	1	2
13	2	domanska-2005	im-1o6	imidazolium	bf4	BF4 derivatives	n-hexane	alkanes	270.075	86.178	307.65	FALSE		0.8443		0.944426			TRUE	TRUE	TRUE	TRUE	TRUE		0.992265	4.9518e-06	0.997519	1.55184e-05	0.99224	4.9464e-06	0.997511	1.55015e-05	0.975684	1.5967e-19	0.99211	5.00393e-19	0.975469	1.7967e-19	0.992039	5.63071e-19		5	1	2	5	1	2
13	3	domanska-2005	im-1o6	imidazolium	bf4	BF4 derivatives	n-heptane	alkanes	270.075	100.205	366.55	FALSE		0.8387		0.933396			TRUE	TRUE	TRUE	TRUE	TRUE		0.98991	0.00010057	0.996232	0.000271013	0.989681	0.00010047	0.996146	0.000270743	0.968625	3.6672e-16	0.988125	9.88393e-16	0.968049	4.162e-16	0.987902	1.12175e-15		5	1	2	5	1	2
13	3	domanska-2005	im-1o6	imidazolium	bf4	BF4 derivatives	n-heptane	alkanes	270.075	100.205	362.45	FALSE		0.8425		0.935138			TRUE	TRUE	TRUE	TRUE	TRUE		0.990532	8.489e-05	0.996466	0.000228765	0.99032	8.4807e-05	0.996386	0.000228541	0.970272	2.3806e-16	0.98876	6.41625e-16	0.969731	2.7011e-16	0.988552	7.28007e-16		5	1	2	5	1	2
13	3	domanska-2005	im-1o6	imidazolium	bf4	BF4 derivatives	n-heptane	alkanes	270.075	100.205	354.05	FALSE		0.85		0.938548			TRUE	TRUE	TRUE	TRUE	TRUE		0.991709	5.9057e-05	0.996908	0.000159156	0.991526	5.9e-05	0.996839	0.000159002	0.973461	9.5038e-17	0.989986	2.56149e-16	0.972986	1.0778e-16	0.989804	2.90491e-16		5	1	2	5	1	2
13	3	domanska-2005	im-1o6	imidazolium	bf4	BF4 derivatives	n-heptane	alkanes	270.075	100.205	343.85	FALSE		0.8609		0.943442			TRUE	TRUE	TRUE	TRUE	TRUE		0.99297	3.688e-05	0.99738	9.93937e-05	0.99282	3.6844e-05	0.997324	9.92967e-05	0.977008	2.9244e-17	0.991344	7.88192e-17	0.976605	3.3137e-17	0.99119	8.93117e-17		5	1	2	5	1	2
13	3	domanska-2005	im-1o6	imidazolium	bf4	BF4 derivatives	n-heptane	alkanes	270.075	100.205	330.35	FALSE		0.8735		0.949008			TRUE	TRUE	TRUE	TRUE	TRUE		0.994387	1.8696e-05	0.99791	5.03883e-05	0.994272	1.8678e-05	0.997867	5.03398e-05	0.981178	5.4634e-18	0.992933	1.47251e-17	0.98086	6.1824e-18	0.992812	1.6663e-17		5	1	2	5	1	2
13	3	domanska-2005	im-1o6	imidazolium	bf4	BF4 derivatives	n-heptane	alkanes	270.075	100.205	319.85	FALSE		0.8834		0.953314			TRUE	TRUE	TRUE	TRUE	TRUE		0.995314	1.0494e-05	0.998256	2.82832e-05	0.995221	1.0483e-05	0.998222	2.82535e-05	0.984033	1.3372e-18	0.994016	3.60405e-18	0.98377	1.5113e-18	0.993916	4.07329e-18		5	1	2	5	1	2
13	3	domanska-2005	im-1o6	imidazolium	bf4	BF4 derivatives	n-heptane	alkanes	270.075	100.205	306.75	FALSE		0.8945		0.958075			TRUE	TRUE	TRUE	TRUE	TRUE		0.996282	4.7712e-06	0.998617	1.28594e-05	0.996213	4.7665e-06	0.998591	1.28467e-05	0.987149	2.0054e-19	0.995193	5.405e-19	0.986945	2.2625e-19	0.995116	6.09795e-19		5	1	2	5	1	2
13	4	domanska-2005	im-1o6	imidazolium	bf4	BF4 derivatives	n-octane	alkanes	270.075	114.232	396.95	FALSE		0.8508		0.930949			TRUE	TRUE	TRUE	TRUE	TRUE		0.990892	0.00031576	0.996127	0.00074622	0.990661	0.00031555	0.996029	0.000745724	0.971514	8.9122e-15	0.98775	2.10708e-14	0.970912	1.0103e-14	0.987487	2.38862e-14		5	1	2	5	1	2
13	4	domanska-2005	im-1o6	imidazolium	bf4	BF4 derivatives	n-octane	alkanes	270.075	114.232	388.95	FALSE		0.8634		0.937279			TRUE	TRUE	TRUE	TRUE	TRUE		0.991976	0.00024038	0.99659	0.000568136	0.991774	0.00024022	0.996504	0.000567758	0.974314	4.3624e-15	0.988972	1.03139e-14	0.973779	4.9452e-15	0.988739	1.16918e-14		5	1	2	5	1	2
13	4	domanska-2005	im-1o6	imidazolium	bf4	BF4 derivatives	n-octane	alkanes	270.075	114.232	377.35	FALSE		0.8759		0.943461			TRUE	TRUE	TRUE	TRUE	TRUE		0.993358	0.00015762	0.99718	0.000372576	0.993194	0.00015751	0.99711	0.000372316	0.978025	1.4623e-15	0.990586	3.45727e-15	0.977575	1.6573e-15	0.990391	3.9183e-15		5	1	2	5	1	2
13	4	domanska-2005	im-1o6	imidazolium	bf4	BF4 derivatives	n-octane	alkanes	270.075	114.232	363.95	FALSE		0.8933		0.951909			TRUE	TRUE	TRUE	TRUE	TRUE		0.994702	9.2694e-05	0.997752	0.000219126	0.994574	9.2631e-05	0.997698	0.000218977	0.981822	3.7738e-16	0.99223	8.92227e-16	0.981459	4.2748e-16	0.992073	1.01068e-15		5	1	2	5	1	2
13	4	domanska-2005	im-1o6	imidazolium	bf4	BF4 derivatives	n-octane	alkanes	270.075	114.232	360.85	FALSE		0.8968		0.953586			TRUE	TRUE	TRUE	TRUE	TRUE		0.994978	8.1393e-05	0.99787	0.000192413	0.994858	8.1338e-05	0.997818	0.000192283	0.982629	2.7171e-16	0.992578	6.42395e-16	0.982284	3.0774e-16	0.99243	7.2758e-16		5	1	2	5	1	2
13	4	domanska-2005	im-1o6	imidazolium	bf4	BF4 derivatives	n-octane	alkanes	270.075	114.232	338.45	FALSE		0.9171		0.963175			TRUE	TRUE	TRUE	TRUE	TRUE		0.996635	2.9064e-05	0.998574	6.87123e-05	0.996559	2.9044e-05	0.998541	6.86651e-05	0.987725	2.0957e-17	0.994771	4.9548e-17	0.987492	2.37e-17	0.994671	5.60331e-17		5	1	2	5	1	2
13	4	domanska-2005	im-1o6	imidazolium	bf4	BF4 derivatives	n-octane	alkanes	270.075	114.232	308.95	FALSE		0.9319		0.970018			TRUE	TRUE	TRUE	TRUE	TRUE		0.998086	5.6183e-06	0.999189	1.32831e-05	0.998046	5.6143e-06	0.999173	1.32736e-05	0.992669	3.9522e-19	0.996886	9.34406e-19	0.99254	4.4554e-19	0.996831	1.05338e-18		5	1	2	5	1	2
13	5	domanska-2005	im-1o6	imidazolium	bf4	BF4 derivatives	cyclohexane	cyclic alkanes	270.075	84.162	353.2	FALSE		0.6609		0.86215			TRUE	TRUE	TRUE	TRUE	TRUE		0.964494	5.714e-05	0.988658	0.000183339	0.964435	5.7071e-05	0.988639	0.000183117	0.924305	1.3504e-16	0.975115	4.33342e-16	0.923712	1.5196e-16	0.974909	4.87638e-16		5	1	1	5	1	1
13	5	domanska-2005	im-1o6	imidazolium	bf4	BF4 derivatives	cyclohexane	cyclic alkanes	270.075	84.162	341.8	FALSE		0.6788		0.871492			TRUE	TRUE	TRUE	TRUE	TRUE		0.969272	3.3448e-05	0.990217	0.000107326	0.969214	3.3408e-05	0.990199	0.000107198	0.933373	3.6254e-17	0.978239	1.16339e-16	0.932852	4.0773e-17	0.978061	1.3084e-16		5	1	1	5	1	1
13	5	domanska-2005	im-1o6	imidazolium	bf4	BF4 derivatives	cyclohexane	cyclic alkanes	270.075	84.162	334.6	FALSE		0.6908		0.877592			TRUE	TRUE	TRUE	TRUE	TRUE		0.972011	2.3291e-05	0.991106	7.47367e-05	0.971954	2.3263e-05	0.991088	7.46469e-05	0.938743	1.5047e-17	0.98007	4.82857e-17	0.938265	1.6914e-17	0.979908	5.42769e-17		5	1	1	5	1	1
13	5	domanska-2005	im-1o6	imidazolium	bf4	BF4 derivatives	cyclohexane	cyclic alkanes	270.075	84.162	334	FALSE		0.6914		0.877893			TRUE	TRUE	TRUE	TRUE	TRUE		0.97223	2.2579e-05	0.991177	7.24522e-05	0.972173	2.2552e-05	0.991159	7.23655e-05	0.939178	1.3958e-17	0.980218	4.47911e-17	0.938704	1.569e-17	0.980057	5.03491e-17		5	1	1	5	1	1
13	5	domanska-2005	im-1o6	imidazolium	bf4	BF4 derivatives	cyclohexane	cyclic alkanes	270.075	84.162	318	FALSE		0.7073		0.885772			TRUE	TRUE	TRUE	TRUE	TRUE		0.977568	9.3526e-06	0.9929	3.00118e-05	0.977517	9.3414e-06	0.992883	2.99758e-05	0.950087	1.6879e-18	0.983893	5.41645e-18	0.9497	1.8947e-18	0.983763	6.08007e-18		5	1	1	5	1	1
13	5	domanska-2005	im-1o6	imidazolium	bf4	BF4 derivatives	cyclohexane	cyclic alkanes	270.075	84.162	300.4	FALSE		0.7187		0.891289			TRUE	TRUE	TRUE	TRUE	TRUE		0.982422	3.1044e-06	0.994455	9.96192e-06	0.982378	3.1007e-06	0.994441	9.95005e-06	0.960565	1.257e-19	0.987368	4.0337e-19	0.960263	1.4083e-19	0.987269	4.51922e-19		5	1	1	5	1	1
13	6	domanska-2005	im-1o6	imidazolium	bf4	BF4 derivatives	benzene	aromatics	270.075	78.114	351.3	FALSE			0.0023		0.00790743		TRUE	TRUE	TRUE	TRUE	TRUE		0.661137	0.00474904	0.870895	0.0162301	0.660403	0.00475569	0.870526	0.0162526	0.577539	1.9605e-08	0.825377	6.77832e-08	0.574826	2.0842e-08	0.823769	7.20601e-08		5	1	1	5	1	1
13	6	domanska-2005	im-1o6	imidazolium	bf4	BF4 derivatives	benzene	aromatics	270.075	78.114	332.9	FALSE			0.0017		0.00585321		TRUE	TRUE	TRUE	TRUE	TRUE		0.701548	0.00282497	0.890437	0.00969985	0.700858	0.00282864	0.890115	0.00971236	0.621762	6.6368e-09	0.850377	2.29464e-08	0.619362	7.0363e-09	0.849076	2.43276e-08		5	1	1	5	1	1
13	6	domanska-2005	im-1o6	imidazolium	bf4	BF4 derivatives	benzene	aromatics	270.075	78.114	305.4	FALSE			0.0012		0.00413674		TRUE	TRUE	TRUE	TRUE	TRUE		0.753597	0.00117362	0.913601	0.00404606	0.752993	0.00117496	0.913344	0.00405067	0.683633	1.0587e-09	0.881952	3.6604e-09	0.681672	1.118e-09	0.881006	3.86543e-09		5	1	1	5	1	1
13	6	domanska-2005	im-1o6	imidazolium	bf4	BF4 derivatives	benzene	aromatics	270.075	78.114	292.7	FALSE			0.001		0.00344897		TRUE	TRUE	TRUE	TRUE	TRUE		0.774383	0.00074367	0.922281	0.00256651	0.773824	0.00074446	0.922052	0.00256923	0.710446	4.0635e-10	0.89455	1.40493e-09	0.708678	4.2829e-10	0.893738	1.48079e-09		5	1	1	5	1	1
13	6	domanska-2005	im-1o6	imidazolium	bf4	BF4 derivatives	benzene	aromatics	270.075	78.114	348	FALSE		0.1874		0.443625			TRUE	TRUE	TRUE	TRUE	TRUE		0.668719	0.00434147	0.874673	0.0148519	0.667992	0.00434748	0.874313	0.0148723	0.585636	1.6259e-08	0.830121	5.62146e-08	0.58298	1.7276e-08	0.828573	5.97308e-08		5	1	1	5	1	1
13	6	domanska-2005	im-1o6	imidazolium	bf4	BF4 derivatives	benzene	aromatics	270.075	78.114	332.9	FALSE		0.1898		0.447499			TRUE	TRUE	TRUE	TRUE	TRUE		0.701548	0.00282497	0.890437	0.00969985	0.700858	0.00282864	0.890115	0.00971236	0.621762	6.6368e-09	0.850377	2.29464e-08	0.619362	7.0363e-09	0.849076	2.43276e-08		5	1	1	5	1	1
13	6	domanska-2005	im-1o6	imidazolium	bf4	BF4 derivatives	benzene	aromatics	270.075	78.114	320.4	FALSE		0.1916		0.450385			TRUE	TRUE	TRUE	TRUE	TRUE		0.726427	0.00192723	0.901775	0.00663189	0.725774	0.00192959	0.901483	0.00663997	0.650521	2.9877e-09	0.865513	1.03298e-08	0.648323	3.1619e-09	0.864386	1.09321e-08		5	1	1	5	1	1
13	6	domanska-2005	im-1o6	imidazolium	bf4	BF4 derivatives	benzene	aromatics	270.075	78.114	312.7	FALSE		0.1934		0.453253			TRUE	TRUE	TRUE	TRUE	TRUE		0.740735	0.00150213	0.908072	0.00517443	0.740106	0.00150391	0.907799	0.00518054	0.667711	1.7747e-09	0.874174	6.13593e-09	0.665636	1.8761e-09	0.873144	6.48652e-09		5	1	1	5	1	1
13	6	domanska-2005	im-1o6	imidazolium	bf4	BF4 derivatives	benzene	aromatics	270.075	78.114	297	FALSE		0.1975		0.459722			TRUE	TRUE	TRUE	TRUE	TRUE		0.767568	0.0008714	0.919469	0.00300638	0.766993	0.00087236	0.919231	0.00300969	0.701496	5.6695e-10	0.890412	1.9602e-09	0.699663	5.9795e-10	0.889557	2.06738e-09		5	1	1	5	1	1
13	7	domanska-2005	im-1o6	imidazolium	bf4	BF4 derivatives	toluene	aromatics	270.075	92.141	382.95	FALSE		0.3137		0.572609			TRUE	TRUE	TRUE	TRUE	TRUE		0.755731	0.00642926	0.900679	0.0186137	0.755197	0.00643838	0.900421	0.0186398	0.685812	1.1028e-08	0.864829	3.23242e-08	0.683291	1.1712e-08	0.863458	3.43291e-08		5	1	1	5	1	1
13	7	domanska-2005	im-1o6	imidazolium	bf4	BF4 derivatives	toluene	aromatics	270.075	92.141	372.25	FALSE		0.3191		0.578707			TRUE	TRUE	TRUE	TRUE	TRUE		0.776297	0.00495399	0.910487	0.0143831	0.775776	0.00496097	0.910242	0.0144031	0.708533	6.2512e-09	0.876928	1.83229e-08	0.706203	6.6336e-09	0.875707	1.94438e-08		5	1	1	5	1	1
13	7	domanska-2005	im-1o6	imidazolium	bf4	BF4 derivatives	toluene	aromatics	270.075	92.141	357.95	FALSE		0.326		0.586386			TRUE	TRUE	TRUE	TRUE	TRUE		0.801521	0.00342017	0.922098	0.0099591	0.801024	0.00342496	0.921874	0.00997296	0.737344	2.7838e-09	0.891639	8.15961e-09	0.735254	2.9505e-09	0.890594	8.64823e-09		5	1	1	5	1	1
13	7	domanska-2005	im-1o6	imidazolium	bf4	BF4 derivatives	toluene	aromatics	270.075	92.141	339.55	FALSE		0.3338		0.594917			TRUE	TRUE	TRUE	TRUE	TRUE		0.830333	0.00203335	0.93483	0.00593665	0.829873	0.00203616	0.934631	0.00594482	0.771849	8.9174e-10	0.908392	2.61378e-09	0.770048	9.436e-10	0.90754	2.76579e-09		5	1	1	5	1	1
13	7	domanska-2005	im-1o6	imidazolium	bf4	BF4 derivatives	toluene	aromatics	270.075	92.141	321.65	FALSE		0.3403		0.601908			TRUE	TRUE	TRUE	TRUE	TRUE		0.854647	0.00116035	0.945158	0.0033935	0.854229	0.00116192	0.944984	0.00339809	0.802693	2.6041e-10	0.922627	7.63289e-10	0.801154	2.7505e-10	0.921933	8.06201e-10		5	1	1	5	1	1
13	7	domanska-2005	im-1o6	imidazolium	bf4	BF4 derivatives	toluene	aromatics	270.075	92.141	311.65	FALSE		0.3436		0.605417			TRUE	TRUE	TRUE	TRUE	TRUE		0.866735	0.00082532	0.950158	0.00241525	0.866342	0.00082642	0.949997	0.00241846	0.818773	1.2313e-10	0.929788	3.60907e-10	0.817372	1.2991e-10	0.929171	3.8078e-10		5	1	1	5	1	1
13	7	domanska-2005	im-1o6	imidazolium	bf4	BF4 derivatives	toluene	aromatics	270.075	92.141	288.15	FALSE		0.353		0.615266			TRUE	TRUE	TRUE	TRUE	TRUE		0.891267	0.00033852	0.960041	0.00099159	0.890939	0.00033895	0.959911	0.000992848	0.853367	1.7264e-11	0.944624	5.06026e-11	0.852267	1.8163e-11	0.944163	5.32377e-11		5	1	1	5	1	1
13	8	domanska-2005	im-1o6	imidazolium	bf4	BF4 derivatives	ethylbenzene	aromatics	270.075	106.168	408.35	FALSE		0.4348		0.661813			TRUE	TRUE	TRUE	TRUE	TRUE		0.820968	0.00794166	0.921043	0.0199577	0.820653	0.00794998	0.920887	0.0199783	0.753187	1.2013e-08	0.885883	3.05592e-08	0.751004	1.282e-08	0.884694	3.26121e-08		5	1	1	5	1	1
13	8	domanska-2005	im-1o6	imidazolium	bf4	BF4 derivatives	ethylbenzene	aromatics	270.075	106.168	402.55	FALSE		0.4432		0.669404			TRUE	TRUE	TRUE	TRUE	TRUE		0.830212	0.00699644	0.925588	0.0176077	0.829897	0.00700386	0.925434	0.0176261	0.764058	9.0423e-09	0.891749	2.30022e-08	0.761977	9.6463e-09	0.890633	2.45387e-08		5	1	1	5	1	1
13	8	domanska-2005	im-1o6	imidazolium	bf4	BF4 derivatives	ethylbenzene	aromatics	270.075	106.168	389.45	FALSE		0.4538		0.678819			TRUE	TRUE	TRUE	TRUE	TRUE		0.849682	0.00518734	0.934977	0.013091	0.84937	0.00519299	0.934829	0.0131051	0.787452	4.6187e-09	0.904072	1.17493e-08	0.785586	4.9234e-09	0.903104	1.25244e-08		5	1	1	5	1	1
13	8	domanska-2005	im-1o6	imidazolium	bf4	BF4 derivatives	ethylbenzene	aromatics	270.075	106.168	371.95	FALSE		0.4651		0.688657			TRUE	TRUE	TRUE	TRUE	TRUE		0.872796	0.00336928	0.945812	0.00852658	0.872493	0.00337306	0.945672	0.00853609	0.816271	1.7509e-09	0.918711	4.45402e-09	0.814666	1.8642e-09	0.917911	4.74224e-09		5	1	1	5	1	1
13	8	domanska-2005	im-1o6	imidazolium	bf4	BF4 derivatives	ethylbenzene	aromatics	270.075	106.168	348.35	FALSE		0.4756		0.697622			TRUE	TRUE	TRUE	TRUE	TRUE		0.899125	0.00175734	0.95776	0.00445831	0.898849	0.00175937	0.957636	0.00446344	0.85093	4.0569e-10	0.935571	1.03201e-09	0.849637	4.3111e-10	0.934956	1.09668e-09		5	1	1	5	1	1
13	8	domanska-2005	im-1o6	imidazolium	bf4	BF4 derivatives	ethylbenzene	aromatics	270.075	106.168	327.85	FALSE		0.4847		0.705257			TRUE	TRUE	TRUE	TRUE	TRUE		0.917928	0.00092369	0.966046	0.00234638	0.917681	0.00092477	0.965938	0.00234912	0.877321	9.5892e-11	0.947895	2.43934e-10	0.876265	1.017e-10	0.94741	2.58709e-10		5	1	1	5	1	1
13	8	domanska-2005	im-1o6	imidazolium	bf4	BF4 derivatives	ethylbenzene	aromatics	270.075	106.168	306.85	FALSE		0.4937		0.712688			TRUE	TRUE	TRUE	TRUE	TRUE		0.933736	0.00043635	0.97286	0.00110926	0.933523	0.00043687	0.972769	0.00111058	0.900974	1.7887e-11	0.958583	4.55018e-11	0.900133	1.8924e-11	0.958209	4.81397e-11		5	1	1	5	1	1
13	9	domanska-2005	im-1o6	imidazolium	bf4	BF4 derivatives	o-xylene	aromatics	270.075	106.168	416.05	FALSE		0.3785		0.607724			TRUE	TRUE	TRUE	TRUE	TRUE		0.793862	0.0102597	0.907379	0.0256922	0.793481	0.0102734	0.907183	0.0257258	0.705924	2.5275e-08	0.859283	6.42957e-08	0.703287	2.6765e-08	0.857744	6.8086e-08		5	1	1	5	1	1
13	9	domanska-2005	im-1o6	imidazolium	bf4	BF4 derivatives	o-xylene	aromatics	270.075	106.168	403.55	FALSE		0.3919		0.621129			TRUE	TRUE	TRUE	TRUE	TRUE		0.815662	0.00786807	0.918408	0.0197749	0.815285	0.00787875	0.91822	0.0198015	0.731817	1.4155e-08	0.874081	3.60081e-08	0.729411	1.498e-08	0.87273	3.81068e-08		5	1	1	5	1	1
13	9	domanska-2005	im-1o6	imidazolium	bf4	BF4 derivatives	o-xylene	aromatics	270.075	106.168	389.95	FALSE		0.4049		0.633808			TRUE	TRUE	TRUE	TRUE	TRUE		0.837247	0.00579347	0.929009	0.014607	0.836878	0.00580149	0.92883	0.0146271	0.758276	7.2346e-09	0.88864	1.84037e-08	0.756104	7.65e-09	0.887466	1.94604e-08		5	1	1	5	1	1
13	9	domanska-2005	im-1o6	imidazolium	bf4	BF4 derivatives	o-xylene	aromatics	270.075	106.168	378.45	FALSE		0.4189		0.647116			TRUE	TRUE	TRUE	TRUE	TRUE		0.853848	0.00440076	0.936955	0.0111193	0.853489	0.00440694	0.936785	0.0111348	0.779295	3.9534e-09	0.899821	1.00568e-08	0.777309	4.1775e-09	0.898779	1.06269e-08		5	1	1	5	1	1
13	9	domanska-2005	im-1o6	imidazolium	bf4	BF4 derivatives	o-xylene	aromatics	270.075	106.168	364.35	FALSE		0.434		0.661084			TRUE	TRUE	TRUE	TRUE	TRUE		0.872251	0.0030698	0.94556	0.00777226	0.871908	0.00307419	0.945402	0.00778332	0.803428	1.7902e-09	0.912259	4.55399e-09	0.801656	1.8898e-09	0.91136	4.80736e-09		5	1	1	5	1	1
13	9	domanska-2005	im-1o6	imidazolium	bf4	BF4 derivatives	o-xylene	aromatics	270.075	106.168	351.95	FALSE		0.4431		0.669315			TRUE	TRUE	TRUE	TRUE	TRUE		0.886753	0.002184	0.952196	0.00553709	0.886428	0.00218715	0.952049	0.00554505	0.823198	8.4653e-10	0.922144	2.15344e-09	0.821604	8.9281e-10	0.921357	2.27117e-09		5	1	1	5	1	1
13	9	domanska-2005	im-1o6	imidazolium	bf4	BF4 derivatives	o-xylene	aromatics	270.075	106.168	342.85	FALSE		0.4499		0.675376			TRUE	TRUE	TRUE	TRUE	TRUE		0.89645	0.00167453	0.956564	0.00424876	0.896139	0.00167696	0.956425	0.00425491	0.836865	4.7209e-10	0.928824	1.20092e-09	0.835394	4.9753e-10	0.928111	1.26564e-09		5	1	1	5	1	1
13	9	domanska-2005	im-1o6	imidazolium	bf4	BF4 derivatives	o-xylene	aromatics	270.075	106.168	330.75	FALSE		0.4577		0.682237			TRUE	TRUE	TRUE	TRUE	TRUE		0.908178	0.00114965	0.961774	0.00291935	0.907888	0.00115132	0.961646	0.00292358	0.85396	2.0663e-10	0.937008	5.25635e-10	0.852645	2.1754e-10	0.936385	5.53388e-10		5	1	1	5	1	1
13	9	domanska-2005	im-1o6	imidazolium	bf4	BF4 derivatives	o-xylene	aromatics	270.075	106.168	322.85	FALSE		0.4631		0.686931			TRUE	TRUE	TRUE	TRUE	TRUE		0.915154	0.00088562	0.964836	0.0022498	0.914879	0.00088691	0.964716	0.00225308	0.864471	1.1653e-10	0.941948	2.96434e-10	0.863255	1.2259e-10	0.94138	3.1185e-10		5	1	1	5	1	1
13	9	domanska-2005	im-1o6	imidazolium	bf4	BF4 derivatives	o-xylene	aromatics	270.075	106.168	304.95	FALSE		0.4804		0.701665			TRUE	TRUE	TRUE	TRUE	TRUE		0.929125	0.00046626	0.970886	0.00118524	0.928885	0.00046694	0.970783	0.00118697	0.886448	2.8524e-11	0.952058	7.25607e-11	0.885439	2.9953e-11	0.9516	7.61958e-11		5	1	1	5	1	1
13	9	domanska-2005	im-1o6	imidazolium	bf4	BF4 derivatives	o-xylene	aromatics	270.075	106.168	294.75	FALSE		0.4895		0.709235			TRUE	TRUE	TRUE	TRUE	TRUE		0.936035	0.00031242	0.97384	0.000794365	0.935816	0.00031287	0.973746	0.000795509	0.89786	1.1854e-11	0.957195	3.01547e-11	0.896961	1.2434e-11	0.956793	3.16302e-11		5	1	1	5	1	1
13	10	domanska-2005	im-1o6	imidazolium	bf4	BF4 derivatives	m-xylene	aromatics	270.075	106.168	408.35	FALSE		0.4496		0.67511			TRUE	TRUE	TRUE	TRUE	TRUE		0.829511	0.00770504	0.925245	0.01937	0.829183	0.00771465	0.925085	0.0193939	0.755267	9.189e-09	0.887012	2.33754e-08	0.753072	9.7582e-09	0.885821	2.48234e-08		5	1	1	5	1	1
13	10	domanska-2005	im-1o6	imidazolium	bf4	BF4 derivatives	m-xylene	aromatics	270.075	106.168	390.45	FALSE		0.4692		0.692178			TRUE	TRUE	TRUE	TRUE	TRUE		0.855887	0.00515149	0.937919	0.0130012	0.855566	0.00515816	0.937767	0.0130179	0.787708	3.7238e-09	0.904205	9.47277e-09	0.785798	3.9504e-09	0.903214	1.00492e-08		5	1	1	5	1	1
13	10	domanska-2005	im-1o6	imidazolium	bf4	BF4 derivatives	m-xylene	aromatics	270.075	106.168	377.95	FALSE		0.4802		0.701497			TRUE	TRUE	TRUE	TRUE	TRUE		0.872257	0.00380512	0.945563	0.00962311	0.871944	0.00381016	0.945419	0.00963578	0.808609	1.8857e-09	0.914876	4.79693e-09	0.806882	1.9989e-09	0.914006	5.08489e-09		5	1	1	5	1	1
13	10	domanska-2005	im-1o6	imidazolium	bf4	BF4 derivatives	m-xylene	aromatics	270.075	106.168	367.25	FALSE		0.4874		0.707499			TRUE	TRUE	TRUE	TRUE	TRUE		0.885009	0.00288843	0.951405	0.0073151	0.884707	0.00289232	0.951268	0.00732491	0.825394	1.0155e-09	0.923226	2.58328e-09	0.823816	1.0757e-09	0.922449	2.73641e-09		5	1	1	5	1	1
13	10	domanska-2005	im-1o6	imidazolium	bf4	BF4 derivatives	m-xylene	aromatics	270.075	106.168	365.05	FALSE		0.489		0.708822			TRUE	TRUE	TRUE	TRUE	TRUE		0.887492	0.00272377	0.952531	0.00689984	0.887193	0.00272746	0.952396	0.00690914	0.828721	8.9021e-10	0.924859	2.26456e-09	0.827173	9.4281e-10	0.9241	2.39836e-09		5	1	1	5	1	1
13	10	domanska-2005	im-1o6	imidazolium	bf4	BF4 derivatives	m-xylene	aromatics	270.075	106.168	363.05	FALSE		0.4902		0.709812			TRUE	TRUE	TRUE	TRUE	TRUE		0.889711	0.00258063	0.953534	0.00653867	0.889413	0.00258413	0.9534	0.00654751	0.83171	7.8866e-10	0.926319	2.00623e-09	0.830188	8.3513e-10	0.925576	2.12444e-09		5	1	1	5	1	1
13	10	domanska-2005	im-1o6	imidazolium	bf4	BF4 derivatives	m-xylene	aromatics	270.075	106.168	341.45	FALSE		0.5032		0.720406			TRUE	TRUE	TRUE	TRUE	TRUE		0.911338	0.00138231	0.963164	0.00350889	0.91107	0.00138423	0.963047	0.00351376	0.861841	1.9475e-10	0.940718	4.95414e-10	0.860592	2.0587e-10	0.940133	5.23701e-10		5	1	1	5	1	1
13	10	domanska-2005	im-1o6	imidazolium	bf4	BF4 derivatives	m-xylene	aromatics	270.075	106.168	310.85	FALSE		0.5148		0.729659			TRUE	TRUE	TRUE	TRUE	TRUE		0.935403	0.00049009	0.973571	0.00124577	0.935186	0.00049079	0.973478	0.00124755	0.898111	1.9238e-11	0.957307	4.89385e-11	0.897201	2.0279e-11	0.9569	5.15866e-11		5	1	1	5	1	1
13	11	domanska-2005	im-1o6	imidazolium	bf4	BF4 derivatives	p-xylene	aromatics	270.075	106.168	410.95	FALSE		0.4335		0.660627			TRUE	TRUE	TRUE	TRUE	TRUE		0.826694	0.00793609	0.923865	0.0199438	0.826375	0.00794551	0.923708	0.0199672	0.754731	8.8181e-09	0.886722	2.24319e-08	0.752483	9.4144e-09	0.8855	2.39488e-08		5	1	1	5	1	1
13	11	domanska-2005	im-1o6	imidazolium	bf4	BF4 derivatives	p-xylene	aromatics	270.075	106.168	402.05	FALSE		0.4471		0.672889			TRUE	TRUE	TRUE	TRUE	TRUE		0.840404	0.00653536	0.930534	0.0164589	0.840086	0.00654328	0.93038	0.0164786	0.771098	5.6807e-09	0.8955	1.44508e-08	0.769004	6.0617e-09	0.894389	1.542e-08		5	1	1	5	1	1
13	11	domanska-2005	im-1o6	imidazolium	bf4	BF4 derivatives	p-xylene	aromatics	270.075	106.168	390.45	FALSE		0.4618		0.685805			TRUE	TRUE	TRUE	TRUE	TRUE		0.856952	0.00501079	0.938421	0.0126488	0.856638	0.00501701	0.938273	0.0126644	0.791343	3.1105e-09	0.906083	7.91263e-09	0.78944	3.3167e-09	0.905101	8.43717e-09		5	1	1	5	1	1
13	11	domanska-2005	im-1o6	imidazolium	bf4	BF4 derivatives	p-xylene	aromatics	270.075	106.168	369.75	FALSE		0.4786		0.700153			TRUE	TRUE	TRUE	TRUE	TRUE		0.882982	0.00299503	0.950483	0.00758383	0.882684	0.00299889	0.950347	0.00759356	0.824522	9.6813e-10	0.922797	2.46277e-09	0.822928	1.0308e-09	0.922011	2.6222e-09		5	1	1	5	1	1
13	11	domanska-2005	im-1o6	imidazolium	bf4	BF4 derivatives	p-xylene	aromatics	270.075	106.168	366.55	FALSE		0.4817		0.702753			TRUE	TRUE	TRUE	TRUE	TRUE		0.886626	0.00275159	0.952139	0.00697001	0.886331	0.00275516	0.952005	0.00697902	0.829323	7.9891e-10	0.925153	2.0323e-09	0.827774	8.5041e-10	0.924394	2.16331e-09		5	1	1	5	1	1
13	11	domanska-2005	im-1o6	imidazolium	bf4	BF4 derivatives	p-xylene	aromatics	270.075	106.168	345.65	FALSE		0.4949		0.71367			TRUE	TRUE	TRUE	TRUE	TRUE		0.908102	0.00152042	0.961741	0.00385866	0.907833	0.00152245	0.961622	0.0038638	0.858599	2.0872e-10	0.939197	5.30951e-10	0.857323	2.2177e-10	0.938596	5.64149e-10		5	1	1	5	1	1
13	11	domanska-2005	im-1o6	imidazolium	bf4	BF4 derivatives	p-xylene	aromatics	270.075	106.168	340.95	FALSE		0.497		0.715384			TRUE	TRUE	TRUE	TRUE	TRUE		0.912403	0.0013169	0.963632	0.00334319	0.912141	0.00131867	0.963517	0.00334768	0.864696	1.5087e-10	0.942053	3.8379e-10	0.863478	1.6023e-10	0.941484	4.076e-10		5	1	1	5	1	1
13	11	domanska-2005	im-1o6	imidazolium	bf4	BF4 derivatives	p-xylene	aromatics	270.075	106.168	298.55	FALSE		0.5084		0.724577			TRUE	TRUE	TRUE	TRUE	TRUE		0.943553	0.00029192	0.977023	0.000742265	0.94336	0.00029232	0.976942	0.000743282	0.912097	5.0809e-12	0.963498	1.2925e-11	0.91133	5.3701e-12	0.963161	1.36607e-11		5	1	1	5	1	1
14	1	domanska-2005	im-1o6	imidazolium	ntf2	NTf2 derivatives	n-hexane	alkanes	463.417	86.178	341.45	FALSE		0.6823		0.920311			TRUE	TRUE	TRUE	TRUE	TRUE		0.881963	0.00056959	0.975716	0.00305532	0.878808	0.00064402	0.974996	0.00345344	0.849225	2.2893e-15	0.968039	1.23106e-14	0.849229	2.4538e-15	0.96804	1.31952e-14		5	3	2	5	3	2
14	1	domanska-2005	im-1o6	imidazolium	ntf2	NTf2 derivatives	n-hexane	alkanes	463.417	86.178	328.49	FALSE		0.7095		0.929246			TRUE	TRUE	TRUE	TRUE	TRUE		0.8992	0.00033874	0.979579	0.00181886	0.896673	0.00038516	0.97902	0.00206769	0.86726	5.4298e-16	0.972325	2.91984e-15	0.867332	5.8145e-16	0.972342	3.12671e-15		5	3	2	5	3	2
14	1	domanska-2005	im-1o6	imidazolium	ntf2	NTf2 derivatives	n-hexane	alkanes	463.417	86.178	320.65	FALSE		0.7299		0.935615			TRUE	TRUE	TRUE	TRUE	TRUE		0.908698	0.00024112	0.981658	0.00129524	0.906509	0.00027513	0.981182	0.00147772	0.877659	2.1406e-16	0.974733	1.15109e-15	0.877763	2.2909e-16	0.974757	1.23192e-15		5	3	2	5	3	2
14	1	domanska-2005	im-1o6	imidazolium	ntf2	NTf2 derivatives	n-hexane	alkanes	463.417	86.178	318.45	FALSE		0.7357		0.937377			TRUE	TRUE	TRUE	TRUE	TRUE		0.911242	0.00021835	0.982209	0.00117304	0.909142	0.00024941	0.981754	0.00133972	0.880504	1.6342e-16	0.975384	8.78781e-16	0.880617	1.7485e-16	0.97541	9.40245e-16		5	3	2	5	3	2
14	1	domanska-2005	im-1o6	imidazolium	ntf2	NTf2 derivatives	n-hexane	alkanes	463.417	86.178	312.95	FALSE		0.7505		0.941777			TRUE	TRUE	TRUE	TRUE	TRUE		0.917373	0.00016911	0.983526	0.000908706	0.915486	0.00019365	0.983122	0.00104046	0.887478	8.1755e-17	0.976965	4.39633e-16	0.88761	8.7436e-17	0.976995	4.70182e-16		5	3	2	5	3	2
14	1	domanska-2005	im-1o6	imidazolium	ntf2	NTf2 derivatives	n-hexane	alkanes	463.417	86.178	308.28	FALSE		0.7605		0.944676			TRUE	TRUE	TRUE	TRUE	TRUE		0.922329	0.0001349	0.984581	0.000724989	0.920611	0.00015481	0.984217	0.000831918	0.893239	4.448e-17	0.978257	2.39189e-16	0.893385	4.7552e-17	0.978289	2.55708e-16		5	3	2	5	3	2
14	1	domanska-2005	im-1o6	imidazolium	ntf2	NTf2 derivatives	n-hexane	alkanes	463.417	86.178	303.1	FALSE		0.7722		0.947994			TRUE	TRUE	TRUE	TRUE	TRUE		0.927566	0.00010392	0.985686	0.000558569	0.926023	0.00011954	0.985362	0.000642483	0.899453	2.2123e-17	0.979635	1.18965e-16	0.899613	2.3639e-17	0.979671	1.27117e-16		5	3	2	5	3	2
14	1	domanska-2005	im-1o6	imidazolium	ntf2	NTf2 derivatives	n-hexane	alkanes	463.417	86.178	299.95	FALSE		0.7819		0.950686			TRUE	TRUE	TRUE	TRUE	TRUE		0.930619	8.8185e-05	0.986326	0.000474027	0.929177	0.00010159	0.986024	0.000546051	0.903141	1.4288e-17	0.980446	7.68329e-17	0.903308	1.5263e-17	0.980483	8.20759e-17		5	3	2	5	3	2
14	2	domanska-2005	im-1o6	imidazolium	ntf2	NTf2 derivatives	n-heptane	alkanes	463.417	100.205	368.95	FALSE		0.7368		0.928296			TRUE	TRUE	TRUE	TRUE	TRUE		0.889733	0.00147568	0.973901	0.00678825	0.88479	0.00165013	0.972615	0.00758597	0.868342	4.5103e-14	0.968256	2.08587e-13	0.867549	4.8642e-14	0.968043	2.24954e-13		5	3	2	5	3	2
14	2	domanska-2005	im-1o6	imidazolium	ntf2	NTf2 derivatives	n-heptane	alkanes	463.417	100.205	357.95	FALSE		0.752		0.933437			TRUE	TRUE	TRUE	TRUE	TRUE		0.903805	0.0010285	0.977504	0.00473883	0.899646	0.00115476	0.976448	0.00531815	0.881765	1.6273e-14	0.971823	7.52576e-14	0.881127	1.7538e-14	0.971655	8.11078e-14		5	3	2	5	3	2
14	2	domanska-2005	im-1o6	imidazolium	ntf2	NTf2 derivatives	n-heptane	alkanes	463.417	100.205	347.95	FALSE		0.7647		0.937616			TRUE	TRUE	TRUE	TRUE	TRUE		0.91541	0.00072293	0.98041	0.00333459	0.911889	0.00081491	0.979534	0.00375761	0.893329	6.0653e-15	0.97483	2.80501e-14	0.892816	6.5319e-15	0.974698	3.0208e-14		5	3	2	5	3	2
14	2	domanska-2005	im-1o6	imidazolium	ntf2	NTf2 derivatives	n-heptane	alkanes	463.417	100.205	340.85	FALSE		0.7749		0.9409			TRUE	TRUE	TRUE	TRUE	TRUE		0.922995	0.00055414	0.98228	0.00255759	0.919886	0.00062649	0.981516	0.00289076	0.901163	2.8984e-15	0.976834	1.34042e-14	0.90073	3.1195e-15	0.976724	1.44267e-14		5	3	2	5	3	2
14	2	domanska-2005	im-1o6	imidazolium	ntf2	NTf2 derivatives	n-heptane	alkanes	463.417	100.205	328.27	FALSE		0.7912		0.946017			TRUE	TRUE	TRUE	TRUE	TRUE		0.935167	0.00033389	0.985231	0.00154227	0.932706	0.00037957	0.984639	0.00175298	0.914266	7.203e-16	0.980126	3.33116e-15	0.913958	7.7428e-16	0.98005	3.5808e-15		5	3	2	5	3	2
14	2	domanska-2005	im-1o6	imidazolium	ntf2	NTf2 derivatives	n-heptane	alkanes	463.417	100.205	322.05	FALSE		0.8002		0.948775			TRUE	TRUE	TRUE	TRUE	TRUE		0.940618	0.00025517	0.986533	0.00117899	0.938439	0.00029089	0.986014	0.00134386	0.920373	3.4669e-16	0.981636	1.60333e-15	0.920119	3.7242e-16	0.981574	1.72233e-15		5	3	2	5	3	2
14	2	domanska-2005	im-1o6	imidazolium	ntf2	NTf2 derivatives	n-heptane	alkanes	463.417	100.205	315.1	FALSE		0.8096		0.951608			TRUE	TRUE	TRUE	TRUE	TRUE		0.946287	0.00018598	0.987875	0.00085952	0.944397	0.00021269	0.987429	0.000982867	0.926902	1.4768e-16	0.983233	6.82974e-16	0.926703	1.5851e-16	0.983185	7.3306e-16		5	3	2	5	3	2
14	2	domanska-2005	im-1o6	imidazolium	ntf2	NTf2 derivatives	n-heptane	alkanes	463.417	100.205	309.38	FALSE		0.8185		0.954245			TRUE	TRUE	TRUE	TRUE	TRUE		0.950634	0.00014144	0.988896	0.000653781	0.948961	0.00016219	0.988504	0.000749638	0.932042	7.096e-17	0.984479	3.28168e-16	0.931883	7.6116e-17	0.98444	3.52013e-16		5	3	2	5	3	2
14	2	domanska-2005	im-1o6	imidazolium	ntf2	NTf2 derivatives	n-heptane	alkanes	463.417	100.205	303.25	FALSE		0.8274		0.95684			TRUE	TRUE	TRUE	TRUE	TRUE		0.954987	0.00010396	0.989911	0.000480602	0.953525	0.00011955	0.989571	0.000552642	0.937315	3.1316e-17	0.985745	1.44827e-16	0.937195	3.3566e-17	0.985717	1.55232e-16		5	3	2	5	3	2
14	3	domanska-2005	im-1o6	imidazolium	ntf2	NTf2 derivatives	cyclohexane	cyclic alkanes	463.417	84.162	352.65	FALSE		0.5105		0.851686			TRUE	TRUE	TRUE	TRUE	TRUE		0.777622	0.00088596	0.950628	0.00485892	0.772526	0.00099689	0.949238	0.00546458	0.762626	1.4596e-14	0.946496	8.03692e-14	0.762379	1.5643e-14	0.946427	8.61343e-14		5	3	1	5	3	1
14	3	domanska-2005	im-1o6	imidazolium	ntf2	NTf2 derivatives	cyclohexane	cyclic alkanes	463.417	84.162	344.65	FALSE		0.5308		0.861671			TRUE	TRUE	TRUE	TRUE	TRUE		0.794479	0.00066082	0.955128	0.00362784	0.789906	0.0007459	0.953922	0.00409335	0.777023	6.5623e-15	0.950466	3.61337e-14	0.776838	7.0305e-15	0.950415	3.87117e-14		5	3	1	5	3	1
14	3	domanska-2005	im-1o6	imidazolium	ntf2	NTf2 derivatives	cyclohexane	cyclic alkanes	463.417	84.162	336.25	FALSE		0.5498		0.870541			TRUE	TRUE	TRUE	TRUE	TRUE		0.811304	0.00047686	0.959472	0.00262008	0.80725	0.00054012	0.958438	0.00296681	0.791856	2.7121e-15	0.954437	1.49335e-14	0.791728	2.9041e-15	0.954404	1.59907e-14		5	3	1	5	3	1
14	3	domanska-2005	im-1o6	imidazolium	ntf2	NTf2 derivatives	cyclohexane	cyclic alkanes	463.417	84.162	329.05	FALSE		0.5669		0.878158			TRUE	TRUE	TRUE	TRUE	TRUE		0.82501	0.00035464	0.962908	0.00194962	0.821376	0.00040294	0.962006	0.00221467	0.804315	1.2234e-15	0.957685	6.73635e-15	0.804232	1.3094e-15	0.957663	7.20988e-15		5	3	1	5	3	1
14	3	domanska-2005	im-1o6	imidazolium	ntf2	NTf2 derivatives	cyclohexane	cyclic alkanes	463.417	84.162	319.35	FALSE		0.5928		0.889086			TRUE	TRUE	TRUE	TRUE	TRUE		0.842436	0.00023177	0.967148	0.00127485	0.839329	0.00026448	0.966402	0.00145456	0.820688	3.9379e-16	0.961834	2.16831e-15	0.82066	4.2116e-16	0.961827	2.31901e-15		5	3	1	5	3	1
14	3	domanska-2005	im-1o6	imidazolium	ntf2	NTf2 derivatives	cyclohexane	cyclic alkanes	463.417	84.162	310.35	FALSE		0.6152		0.897992			TRUE	TRUE	TRUE	TRUE	TRUE		0.857546	0.00015158	0.970714	0.000834068	0.854889	0.00017368	0.970095	0.000955578	0.83542	1.2852e-16	0.965458	7.07663e-16	0.835437	1.3735e-16	0.965462	7.56283e-16		5	3	1	5	3	1
14	3	domanska-2005	im-1o6	imidazolium	ntf2	NTf2 derivatives	cyclohexane	cyclic alkanes	463.417	84.162	305.75	FALSE		0.6279		0.902833			TRUE	TRUE	TRUE	TRUE	TRUE		0.864881	0.00012053	0.97241	0.000663308	0.862437	0.0001384	0.971848	0.00076159	0.842765	7.0564e-17	0.967227	3.88543e-16	0.842803	7.5382e-17	0.967236	4.15072e-16		5	3	1	5	3	1
14	4	domanska-2005	im-1o6	imidazolium	ntf2	NTf2 derivatives	benzene	aromatics	463.417	78.114	351.55	FALSE		0.0253		0.133441			TRUE	TRUE	TRUE	TRUE	TRUE										0.26394	0.00205551	0.680239	0.0120721	0.262487	0.00185918	0.678606	0.0109295		5	3	1	5	3	1
14	4	domanska-2005	im-1o6	imidazolium	ntf2	NTf2 derivatives	benzene	aromatics	463.417	78.114	350.59	FALSE		0.0314		0.1613			TRUE	TRUE	TRUE	TRUE	TRUE										0.267154	5.4493e-07	0.683812	3.23283e-06	0.265799	5.663e-07	0.682312	3.35961e-06		5	3	1	5	3	1
14	4	domanska-2005	im-1o6	imidazolium	ntf2	NTf2 derivatives	benzene	aromatics	463.417	78.114	348.61	FALSE		0.039		0.194042			TRUE	TRUE	TRUE	TRUE	TRUE										0.27243	4.8021e-07	0.689574	2.84887e-06	0.271118	4.9951e-07	0.688154	2.96337e-06		5	3	1	5	3	1
14	4	domanska-2005	im-1o6	imidazolium	ntf2	NTf2 derivatives	benzene	aromatics	463.417	78.114	344.25	FALSE		0.046		0.222429			TRUE	TRUE	TRUE	TRUE	TRUE										0.284031	3.6491e-07	0.701804	2.16485e-06	0.282803	3.8017e-07	0.700537	2.25538e-06		5	3	1	5	3	1
14	4	domanska-2005	im-1o6	imidazolium	ntf2	NTf2 derivatives	benzene	aromatics	463.417	78.114	333.58	FALSE		0.0564		0.261773			TRUE	TRUE	TRUE	TRUE	TRUE										0.312399	1.8871e-07	0.72939	1.11953e-06	0.31136	1.9693e-07	0.728433	1.1683e-06		5	3	1	5	3	1
14	4	domanska-2005	im-1o6	imidazolium	ntf2	NTf2 derivatives	benzene	aromatics	463.417	78.114	324.05	FALSE		0.0637		0.287554			TRUE	TRUE	TRUE	TRUE	TRUE		0.151521	0.0584408	0.51443	0.269125					0.337854	1.0493e-07	0.751679	6.22505e-07	0.336968	1.0948e-07	0.750939	6.49498e-07		5	3	1	5	3	1
14	4	domanska-2005	im-1o6	imidazolium	ntf2	NTf2 derivatives	benzene	aromatics	463.417	78.114	315.1	FALSE		0.0693		0.306394			TRUE	TRUE	TRUE	TRUE	TRUE		0.209599	0.0354918	0.61138	0.179188	0.184285	0.0444778	0.5727	0.216393	0.361967	5.9973e-08	0.770939	3.55794e-07	0.361209	6.2514e-08	0.770358	3.70869e-07		5	3	1	5	3	1
14	4	domanska-2005	im-1o6	imidazolium	ntf2	NTf2 derivatives	benzene	aromatics	463.417	78.114	308.35	FALSE		0.0734		0.319702			TRUE	TRUE	TRUE	TRUE	TRUE		0.245205	0.0263407	0.658386	0.138299	0.224068	0.0318418	0.631427	0.163262	0.380323	3.895e-08	0.784533	2.31074e-07	0.379658	4.0557e-08	0.784056	2.40607e-07		5	3	1	5	3	1
14	4	domanska-2005	im-1o6	imidazolium	ntf2	NTf2 derivatives	benzene	aromatics	463.417	78.114	303.29	FALSE		0.0766		0.329818			TRUE	TRUE	TRUE	TRUE	TRUE		0.269984	0.0214034	0.686919	0.114852	0.250762	0.0254983	0.665055	0.13437	0.39419	2.7979e-08	0.794248	1.65987e-07	0.393594	2.9107e-08	0.79384	1.72679e-07		5	3	1	5	3	1
14	4	domanska-2005	im-1o6	imidazolium	ntf2	NTf2 derivatives	benzene	aromatics	463.417	78.114	298.45	FALSE		0.08		0.340315			TRUE	TRUE	TRUE	TRUE	TRUE		0.292589	0.0176653	0.710459	0.0964009	0.274889	0.0208505	0.692217	0.112162	0.407549	2.0249e-08	0.80319	1.20129e-07	0.40702	2.1046e-08	0.802843	1.24857e-07		5	3	1	5	3	1
14	4	domanska-2005	im-1o6	imidazolium	ntf2	NTf2 derivatives	benzene	aromatics	463.417	78.114	351.7	FALSE			0.0189		0.102564		TRUE	TRUE	TRUE	TRUE	TRUE										0.263557	0.00211303	0.67981	0.0124064	0.262099	0.00194177	0.678169	0.0114104		5	3	1	5	3	1
14	4	domanska-2005	im-1o6	imidazolium	ntf2	NTf2 derivatives	benzene	aromatics	463.417	78.114	351.37	FALSE			0.0149		0.0823435		TRUE	TRUE	TRUE	TRUE	TRUE										0.264401	0.00197936	0.680755	0.0116292	0.262953	0.0017196	0.679131	0.0101158		5	3	1	5	3	1
14	4	domanska-2005	im-1o6	imidazolium	ntf2	NTf2 derivatives	benzene	aromatics	463.417	78.114	348.7	FALSE			0.0105		0.0592247		TRUE	TRUE	TRUE	TRUE	TRUE										0.272191	4.8296e-07	0.689315	2.86519e-06	0.270876	5.0235e-07	0.687891	2.98022e-06		5	3	1	5	3	1
14	4	domanska-2005	im-1o6	imidazolium	ntf2	NTf2 derivatives	benzene	aromatics	463.417	78.114	345.77	FALSE			0.0086		0.0489439		TRUE	TRUE	TRUE	TRUE	TRUE										0.27999	4.0136e-07	0.697611	2.38109e-06	0.278732	4.1794e-07	0.696291	2.47945e-06		5	3	1	5	3	1
14	4	domanska-2005	im-1o6	imidazolium	ntf2	NTf2 derivatives	benzene	aromatics	463.417	78.114	338.35	FALSE			0.007		0.040142		TRUE	TRUE	TRUE	TRUE	TRUE										0.299711	2.5308e-07	0.717437	1.50141e-06	0.29859	2.6399e-07	0.716352	1.56614e-06		5	3	1	5	3	1
14	4	domanska-2005	im-1o6	imidazolium	ntf2	NTf2 derivatives	benzene	aromatics	463.417	78.114	328.65	FALSE			0.0056		0.0323294		TRUE	TRUE	TRUE	TRUE	TRUE										0.325546	1.3937e-07	0.74117	8.26822e-07	0.324587	1.4545e-07	0.74033	8.62892e-07		5	3	1	5	3	1
14	4	domanska-2005	im-1o6	imidazolium	ntf2	NTf2 derivatives	benzene	aromatics	463.417	78.114	319.75	FALSE			0.0044		0.0255488		TRUE	TRUE	TRUE	TRUE	TRUE		0.182027	0.0448277	0.569003	0.217787	0.150422	0.0596799	0.512289	0.273534	0.349409	8.0319e-08	0.761118	4.76498e-07	0.348587	8.3772e-08	0.76046	4.96983e-07		5	3	1	5	3	1
14	4	domanska-2005	im-1o6	imidazolium	ntf2	NTf2 derivatives	benzene	aromatics	463.417	78.114	308.93	FALSE			0.0029		0.0169618		TRUE	TRUE	TRUE	TRUE	TRUE		0.242339	0.0269969	0.65488	0.14134	0.220876	0.0327	0.627122	0.167051	0.378738	4.0438e-08	0.783393	2.39901e-07	0.378066	4.2111e-08	0.782908	2.49827e-07		5	3	1	5	3	1
14	4	domanska-2005	im-1o6	imidazolium	ntf2	NTf2 derivatives	benzene	aromatics	463.417	78.114	302.25	FALSE			0.0024		0.0140716		TRUE	TRUE	TRUE	TRUE	TRUE		0.274916	0.0205297	0.692245	0.110595	0.25609	0.024404	0.671299	0.129223	0.397054	2.6117e-08	0.796199	1.54941e-07	0.396472	2.7165e-08	0.795804	1.61158e-07		5	3	1	5	3	1
14	5	domanska-2005	im-1o6	imidazolium	ntf2	NTf2 derivatives	toluene	aromatics	463.417	92.141	304.56	FALSE		0.1349		0.439546			TRUE	TRUE	TRUE	TRUE	TRUE		0.447892	0.0118741	0.803153	0.056993	0.431807	0.0137636	0.792626	0.0655858	0.574727	2.9234e-09	0.871744	1.4703e-08	0.574346	3.0215e-09	0.87157	1.51964e-08		5	3	1	5	3	1
14	5	domanska-2005	im-1o6	imidazolium	ntf2	NTf2 derivatives	toluene	aromatics	463.417	92.141	311.4	FALSE		0.1312		0.43166			TRUE	TRUE	TRUE	TRUE	TRUE		0.418684	0.0149814	0.783661	0.0710583	0.401089	0.0174286	0.771072	0.0819039	0.556627	4.6511e-09	0.863279	2.33924e-08	0.556148	4.8119e-09	0.863049	2.42011e-08		5	3	1	5	3	1
14	5	domanska-2005	im-1o6	imidazolium	ntf2	NTf2 derivatives	toluene	aromatics	463.417	92.141	319.56	FALSE		0.1266		0.421638			TRUE	TRUE	TRUE	TRUE	TRUE		0.382142	0.0197508	0.756731	0.0920126	0.362513	0.0231272	0.740935	0.106401	0.53495	7.8992e-09	0.852625	3.97285e-08	0.534348	8.1816e-09	0.85232	4.11488e-08		5	3	1	5	3	1
14	5	domanska-2005	im-1o6	imidazolium	ntf2	NTf2 derivatives	toluene	aromatics	463.417	92.141	323.15	FALSE		0.1234		0.41452			TRUE	TRUE	TRUE	TRUE	TRUE		0.365403	0.022322	0.743324	0.103002	0.344717	0.0262402	0.72571	0.119354	0.525389	9.895e-09	0.847736	4.97662e-08	0.52473	1.0254e-08	0.847394	5.15718e-08		5	3	1	5	3	1
14	5	domanska-2005	im-1o6	imidazolium	ntf2	NTf2 derivatives	toluene	aromatics	463.417	92.141	331.3	FALSE		0.1193		0.405218			TRUE	TRUE	TRUE	TRUE	TRUE		0.325503	0.0296321	0.708211	0.133136	0.302081	0.0353014	0.685227	0.155436	0.503635	1.6238e-08	0.836149	8.16679e-08	0.502843	1.6844e-08	0.835714	8.47158e-08		5	3	1	5	3	1
14	5	domanska-2005	im-1o6	imidazolium	ntf2	NTf2 derivatives	toluene	aromatics	463.417	92.141	334.1	FALSE		0.1177		0.401532			TRUE	TRUE	TRUE	TRUE	TRUE		0.311087	0.0327625	0.694293	0.145561	0.286472	0.0392929	0.668792	0.170609	0.496146	1.9157e-08	0.832003	9.63488e-08	0.495306	1.9879e-08	0.831533	9.99801e-08		5	3	1	5	3	1
14	5	domanska-2005	im-1o6	imidazolium	ntf2	NTf2 derivatives	toluene	aromatics	463.417	92.141	340.23	FALSE		0.1141		0.393119			TRUE	TRUE	TRUE	TRUE	TRUE		0.277768	0.0412203	0.659204	0.177785	0.249696	0.0505365	0.625995	0.211169	0.479726	2.7296e-08	0.822615	1.37283e-07	0.478781	2.8344e-08	0.822062	1.42554e-07		5	3	1	5	3	1
14	5	domanska-2005	im-1o6	imidazolium	ntf2	NTf2 derivatives	toluene	aromatics	463.417	92.141	344.25	FALSE		0.1116		0.387177			TRUE	TRUE	TRUE	TRUE	TRUE		0.254112	0.0484793	0.631465	0.203978	0.222502	0.0609574	0.590048	0.246127	0.468941	3.4241e-08	0.816215	1.72213e-07	0.467923	3.557e-08	0.815601	1.78897e-07		5	3	1	5	3	1
14	5	domanska-2005	im-1o6	imidazolium	ntf2	NTf2 derivatives	toluene	aromatics	463.417	92.141	355.1	FALSE		0.1056		0.372575			FALSE	TRUE	TRUE	TRUE	FALSE										0.439761	6.1923e-08	0.797893	3.11438e-07	0.438532	6.4374e-08	0.797087	3.23765e-07		5	3	1	5	3	1
14	5	domanska-2005	im-1o6	imidazolium	ntf2	NTf2 derivatives	toluene	aromatics	463.417	92.141	362.14	FALSE		0.1017		0.362814			TRUE	TRUE	TRUE	TRUE	TRUE										0.420766	8.9767e-08	0.785107	4.51477e-07	0.419393	9.3337e-08	0.784154	4.69432e-07		5	3	1	5	3	1
14	5	domanska-2005	im-1o6	imidazolium	ntf2	NTf2 derivatives	toluene	aromatics	463.417	92.141	364.33	FALSE		0.0997		0.357724			TRUE	TRUE	TRUE	TRUE	TRUE										0.414846	1.0058e-07	0.780972	5.0586e-07	0.413426	1.0458e-07	0.779969	5.25978e-07		5	3	1	5	3	1
14	5	domanska-2005	im-1o6	imidazolium	ntf2	NTf2 derivatives	toluene	aromatics	463.417	92.141	383.42	FALSE		0.0835		0.314232			TRUE	TRUE	TRUE	TRUE	TRUE										0.362959	2.638e-07	0.741305	1.32676e-06	0.361102	2.7375e-07	0.73976	1.37681e-06		5	3	1	5	3	1
14	5	domanska-2005	im-1o6	imidazolium	ntf2	NTf2 derivatives	toluene	aromatics	463.417	92.141	379.5	FALSE			0.0105		0.0506654		TRUE	TRUE	TRUE	TRUE	TRUE										0.373661	2.1709e-07	0.750029	1.09184e-06	0.371899	2.2544e-07	0.748613	1.13383e-06		5	3	1	5	3	1
14	5	domanska-2005	im-1o6	imidazolium	ntf2	NTf2 derivatives	toluene	aromatics	463.417	92.141	376.4	FALSE			0.0097		0.0469504		TRUE	TRUE	TRUE	TRUE	TRUE										0.382106	1.8591e-07	0.756703	9.35021e-07	0.380416	1.9315e-07	0.755382	9.71434e-07		5	3	1	5	3	1
14	5	domanska-2005	im-1o6	imidazolium	ntf2	NTf2 derivatives	toluene	aromatics	463.417	92.141	369.8	FALSE			0.0086		0.0418045		TRUE	TRUE	TRUE	TRUE	TRUE										0.400032	1.3318e-07	0.770295	6.6982e-07	0.398493	1.3845e-07	0.769157	6.96325e-07		5	3	1	5	3	1
14	5	domanska-2005	im-1o6	imidazolium	ntf2	NTf2 derivatives	toluene	aromatics	463.417	92.141	349.1	FALSE			0.0059		0.0289846		TRUE	FALSE	TRUE	TRUE	FALSE		0.222419	0.0603066	0.589931	0.244013					0.455912	4.4771e-08	0.808221	2.25173e-07	0.4548	4.6527e-08	0.807526	2.34004e-07		5	3	1	5	3	1
14	5	domanska-2005	im-1o6	imidazolium	ntf2	NTf2 derivatives	toluene	aromatics	463.417	92.141	334.1	FALSE			0.0044		0.021744		TRUE	TRUE	TRUE	TRUE	TRUE		0.311087	0.0327625	0.694293	0.145561	0.286472	0.0392929	0.668792	0.170609	0.496146	1.9157e-08	0.832003	9.63488e-08	0.495306	1.9879e-08	0.831533	9.99801e-08		5	3	1	5	3	1
14	5	domanska-2005	im-1o6	imidazolium	ntf2	NTf2 derivatives	toluene	aromatics	463.417	92.141	313.1	FALSE			0.0026		0.0129409		TRUE	TRUE	TRUE	TRUE	TRUE		0.411231	0.0158688	0.778411	0.0750145	0.393237	0.0184817	0.765232	0.0865102	0.552117	5.2047e-09	0.861109	2.61767e-08	0.551612	5.3859e-09	0.860865	2.7088e-08		5	3	1	5	3	1
14	5	domanska-2005	im-1o6	imidazolium	ntf2	NTf2 derivatives	toluene	aromatics	463.417	92.141	298.13	FALSE			0.0016		0.00799555		TRUE	TRUE	TRUE	TRUE	TRUE		0.474284	0.00951805	0.819409	0.0461023	0.459512	0.0110062	0.81046	0.0530044	0.591676	1.8547e-09	0.879341	9.32809e-09	0.591385	1.9151e-09	0.879213	9.63187e-09		5	3	1	5	3	1
14	6	domanska-2005	im-1o6	imidazolium	ntf2	NTf2 derivatives	ethylbenzene	aromatics	463.417	106.168	400.45	FALSE		0.1232		0.380161			TRUE	TRUE	TRUE	TRUE	TRUE										0.460449	1.8107e-07	0.78836	7.90359e-07	0.458581	1.8853e-07	0.787103	8.22922e-07		5	3	1	5	3	1
14	6	domanska-2005	im-1o6	imidazolium	ntf2	NTf2 derivatives	ethylbenzene	aromatics	463.417	106.168	384.55	FALSE		0.1409		0.417212			FALSE	TRUE	TRUE	TRUE	FALSE										0.503566	8.5301e-08	0.815758	3.72334e-07	0.502095	8.8905e-08	0.814872	3.88065e-07		5	3	1	5	3	1
14	6	domanska-2005	im-1o6	imidazolium	ntf2	NTf2 derivatives	ethylbenzene	aromatics	463.417	106.168	375.45	FALSE		0.1509		0.43685			TRUE	TRUE	TRUE	TRUE	TRUE		0.278056	0.0707252	0.627026	0.249366	0.237209	0.0909365	0.575801	0.303931	0.52781	5.4409e-08	0.829906	2.37492e-07	0.526545	5.67e-08	0.829188	2.47492e-07		5	3	1	5	3	1
14	6	domanska-2005	im-1o6	imidazolium	ntf2	NTf2 derivatives	ethylbenzene	aromatics	463.417	106.168	367.95	FALSE		0.1594		0.452867			TRUE	TRUE	TRUE	TRUE	TRUE		0.326666	0.053278	0.679244	0.197202	0.295152	0.0647109	0.646368	0.231952	0.547553	3.7088e-08	0.840827	1.61887e-07	0.546445	3.8636e-08	0.840228	1.68644e-07		5	3	1	5	3	1
14	6	domanska-2005	im-1o6	imidazolium	ntf2	NTf2 derivatives	ethylbenzene	aromatics	463.417	106.168	356.75	FALSE		0.1682		0.468832			TRUE	TRUE	TRUE	TRUE	TRUE		0.388858	0.0367934	0.735262	0.142908	0.363564	0.0433422	0.713752	0.165106	0.576621	2.042e-08	0.856008	8.91321e-08	0.57573	2.1253e-08	0.855558	9.27681e-08		5	3	1	5	3	1
14	6	domanska-2005	im-1o6	imidazolium	ntf2	NTf2 derivatives	ethylbenzene	aromatics	463.417	106.168	345.35	FALSE		0.1749		0.480588			TRUE	TRUE	TRUE	TRUE	TRUE		0.445057	0.0258694	0.777809	0.103876	0.423634	0.0300589	0.762373	0.119153	0.605677	1.0745e-08	0.870206	4.69013e-08	0.604984	1.117e-08	0.869878	4.87564e-08		5	3	1	5	3	1
[truncated: 10,346 more rows]

## Sheet: Datasets
Data set general information												Predicted type of LLE phase diagram						RMSE between computed and experimental IL mole fractions					Number of data points with no liquid phase split predicted					Miscibility type predicted (I = immiscible, PM = partially, CM = complete)
[truncated: 963 more rows]

## Sheet: COSMO Sigma-profiles
molecule	molecule class	conformation		p(σ)
[truncated: 797 more rows]
[truncated: 15 more columns]

[truncated: 1 more sheets: FINE Sigma-profiles]
